# Supplementary material for: The transcription factor Xrp1 orchestrates both reduced translation and cell competition upon defective ribosome assembly or function
Source: eLife journal article supplement (doi:10.7554/elife.71705), 2022-02-18

Figure 1 source data 1

unedited northern, 7SL probe

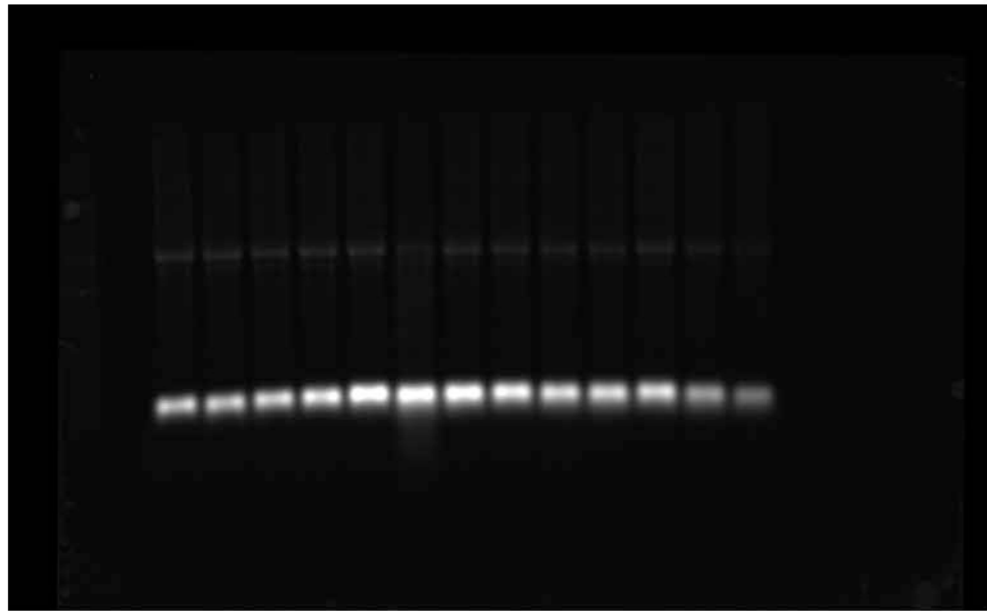

unedited northern, 5.8S probe

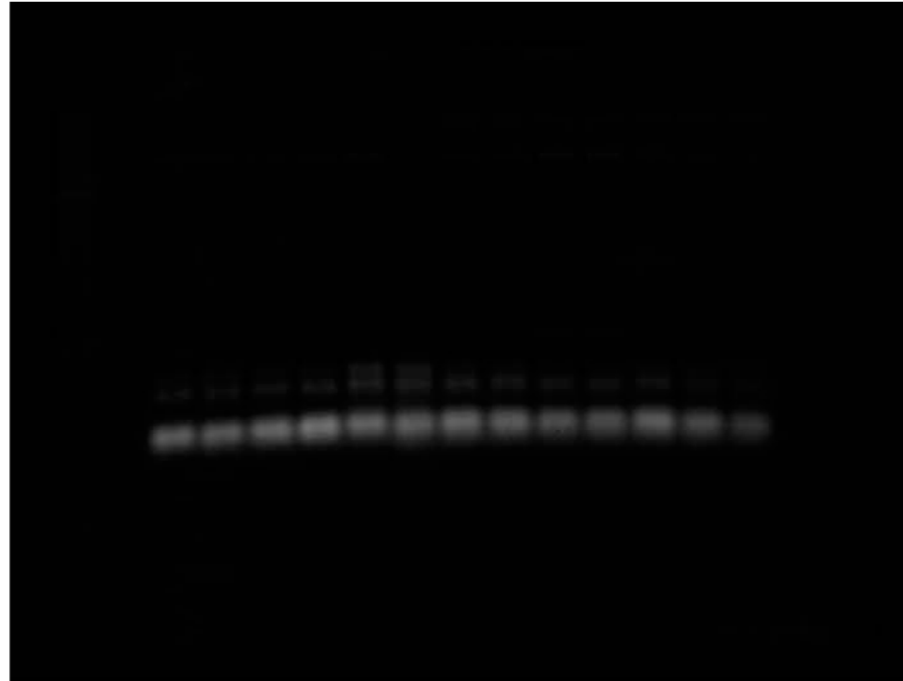

unedited northern, 18S probe

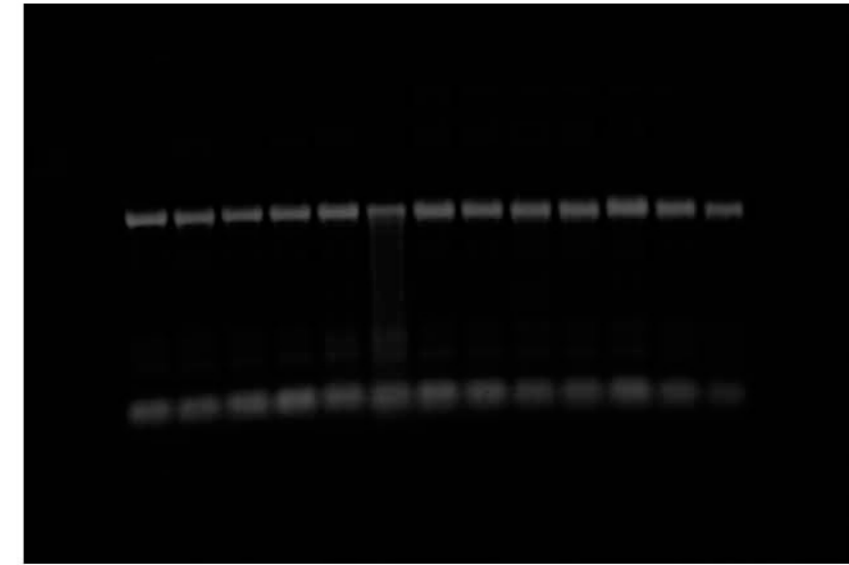

labelled northern, 7SL probe

wild type- Xrp1<sup>+/+</sup>  
Xrp1<sup>+/-</sup>  
RpS18<sup>+/-</sup>  
RpS18<sup>+/-</sup>; Xrp1<sup>+/-</sup>  
RpL27A<sup>+/-</sup>  
RpL27A<sup>+/-</sup>; Xrp1<sup>+/-</sup>  
RpS3<sup>+/-</sup>  
RpS3<sup>+/-</sup>; Xrp1<sup>+/-</sup>  
RpL14<sup>+/-</sup>  
RpL14<sup>+/-</sup>; Xrp1<sup>+/-</sup>  
100% wild type  
75% wild type  
50% wild type

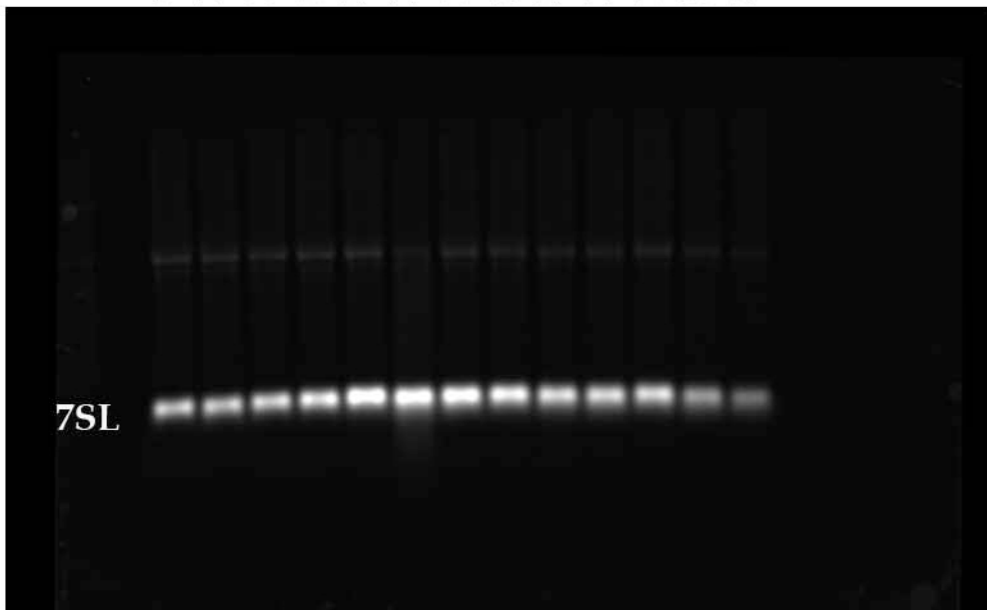

labelled northern, 5.8 probe

wild type- Xrp1<sup>+/+</sup>  
Xrp1<sup>+/-</sup>  
RpS18<sup>+/-</sup>  
RpS18<sup>+/-</sup>; Xrp1<sup>+/-</sup>  
RpL27A<sup>+/-</sup>  
RpL27A<sup>+/-</sup>; Xrp1<sup>+/-</sup>  
RpS3<sup>+/-</sup>  
RpS3<sup>+/-</sup>; Xrp1<sup>+/-</sup>  
RpL14<sup>+/-</sup>  
RpL14<sup>+/-</sup>; Xrp1<sup>+/-</sup>  
100% wild type  
75% wild type  
50% wild type

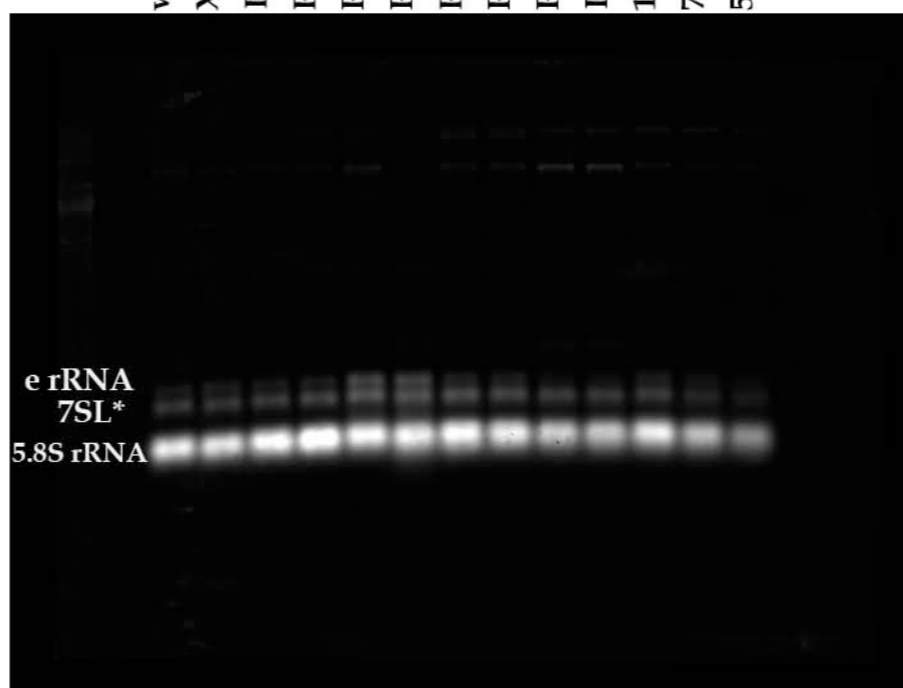

labelled northern, 18S probe

wild type- Xrp1<sup>+/+</sup>  
Xrp1<sup>+/-</sup>  
RpS18<sup>+/-</sup>  
RpS18<sup>+/-</sup>; Xrp1<sup>+/-</sup>  
RpL27A<sup>+/-</sup>  
RpL27A<sup>+/-</sup>; Xrp1<sup>+/-</sup>  
RpS3<sup>+/-</sup>  
RpS3<sup>+/-</sup>; Xrp1<sup>+/-</sup>  
RpL14<sup>+/-</sup>  
RpL14<sup>+/-</sup>; Xrp1<sup>+/-</sup>  
100% wild type  
75% wild type  
50% wild type

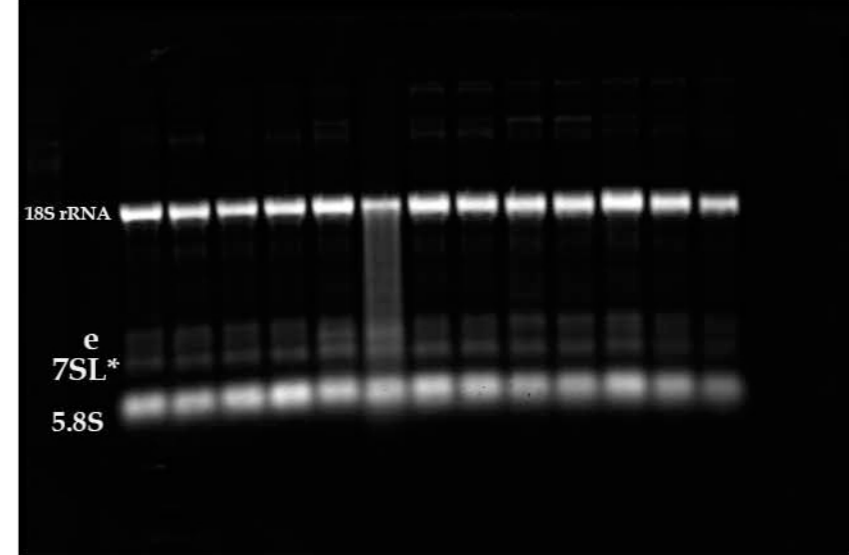

Supplement: fig1-data1 [file elife-71705-fig1-data1-v3.pdf]
