# Supplementary material for: The transcription factor Xrp1 orchestrates both reduced translation and cell competition upon defective ribosome assembly or function
Source: eLife journal article supplement (doi:10.7554/elife.71705), 2022-02-18
Supplement: fig2-data1 [file elife-71705-fig2-data1-v3.pdf]

Figure 2 source data file 1

unedited northern, actin probe

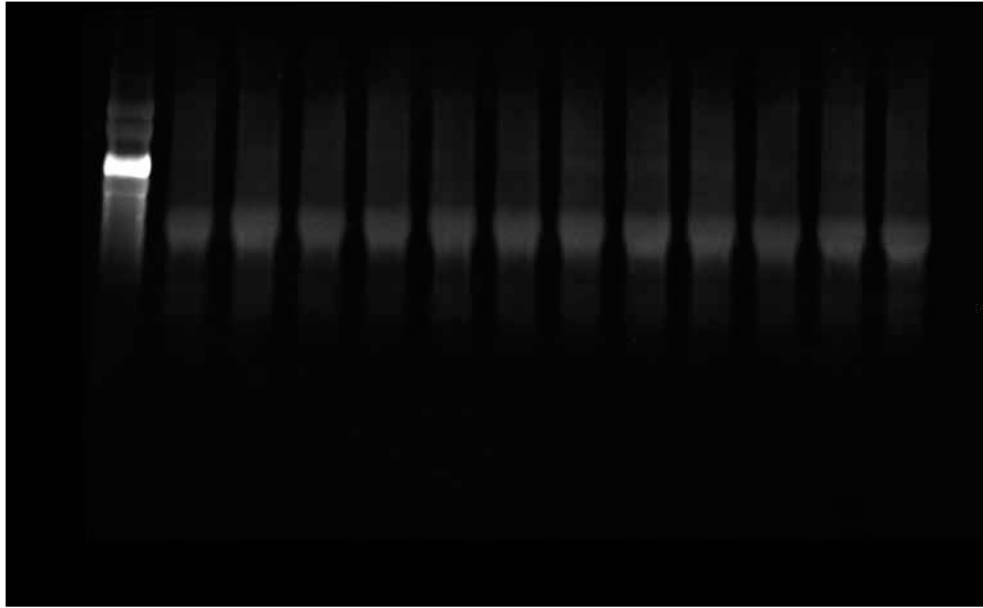

unedited northern, ITS1 probe

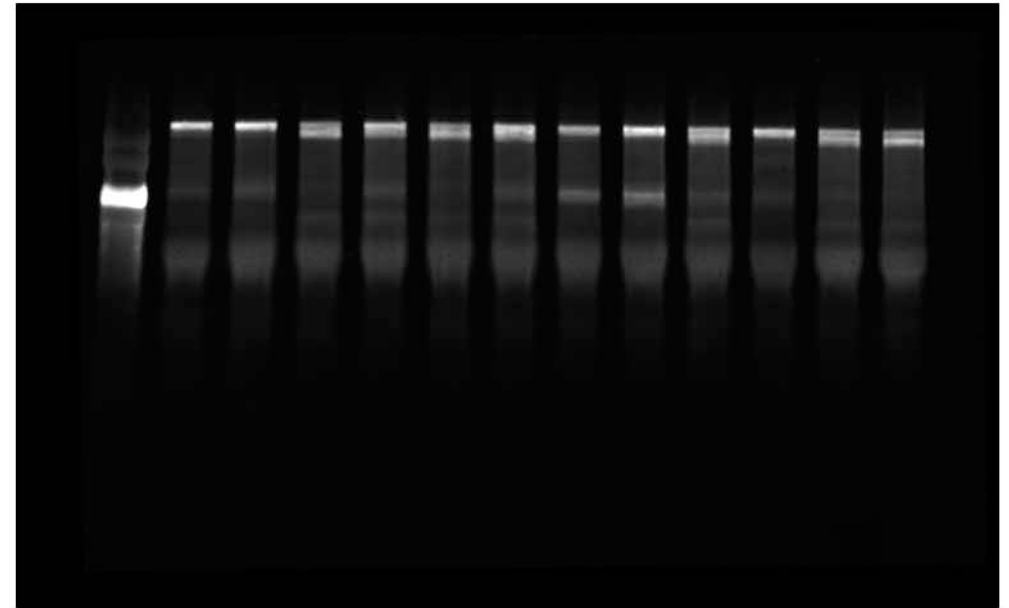

labelled northern, actin probe

marker  
wild type  
Xrp1<sup>+/-</sup>  
RpS3<sup>+/-</sup>  
RpS3<sup>+/-</sup>; Xrp1<sup>+/-</sup>  
RpS17<sup>+/-</sup>  
RpS17<sup>+/-</sup>; Xrp1<sup>+/-</sup>  
RpL27A<sup>+/-</sup>  
RpL27A<sup>+/-</sup>; Xrp1<sup>+/-</sup>  
RpS17<sup>+/-</sup>; RpL27A<sup>+/-</sup>

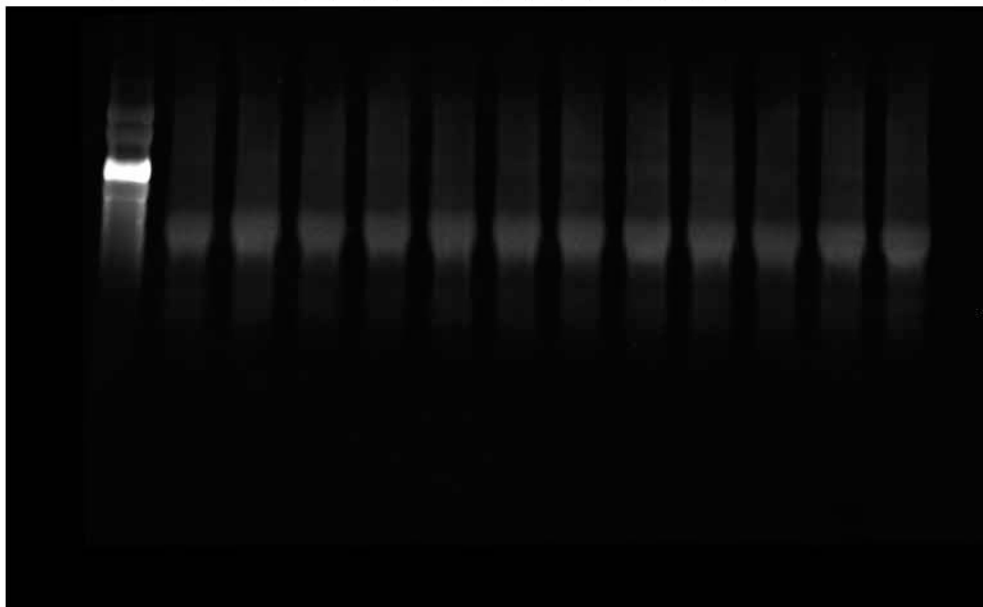

actin\*

labelled northern, ITS1 probe

marker  
wild type  
Xrp1<sup>+/-</sup>  
RpS3<sup>+/-</sup>  
RpS3<sup>+/-</sup>; Xrp1<sup>+/-</sup>  
RpS17<sup>+/-</sup>  
RpS17<sup>+/-</sup>; Xrp1<sup>+/-</sup>  
RpL27A<sup>+/-</sup>  
RpL27A<sup>+/-</sup>; Xrp1<sup>+/-</sup>  
RpS17<sup>+/-</sup>; RpL27A<sup>+/-</sup>

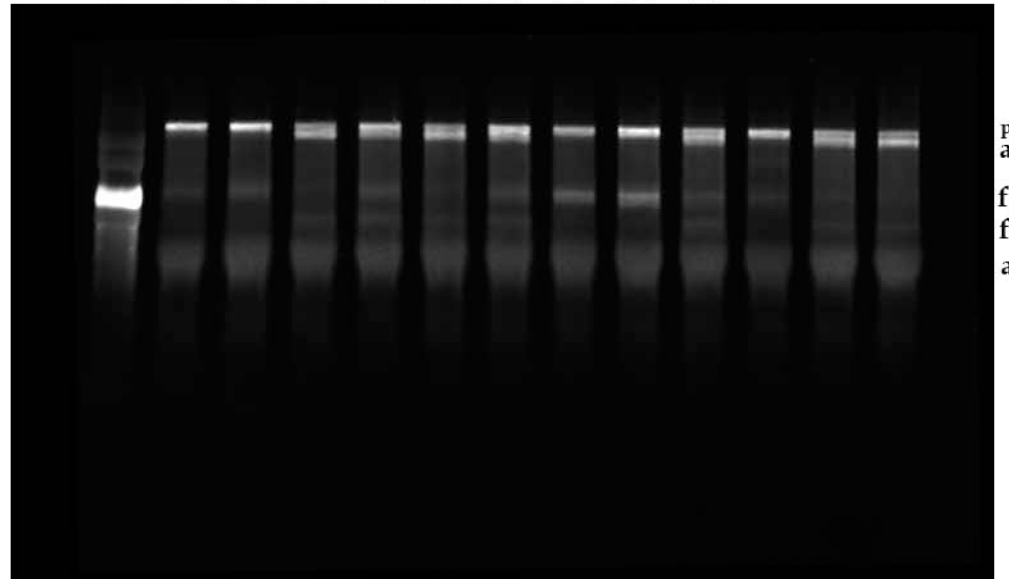

pre-rRNA  
a band  
f band  
f' band  
actin\*
