# Supplementary material for: The transcription factor Xrp1 orchestrates both reduced translation and cell competition upon defective ribosome assembly or function
Source: eLife journal article supplement (doi:10.7554/elife.71705), 2022-02-18

Figure 2 source data file 2

unedited northern, tubulin probe

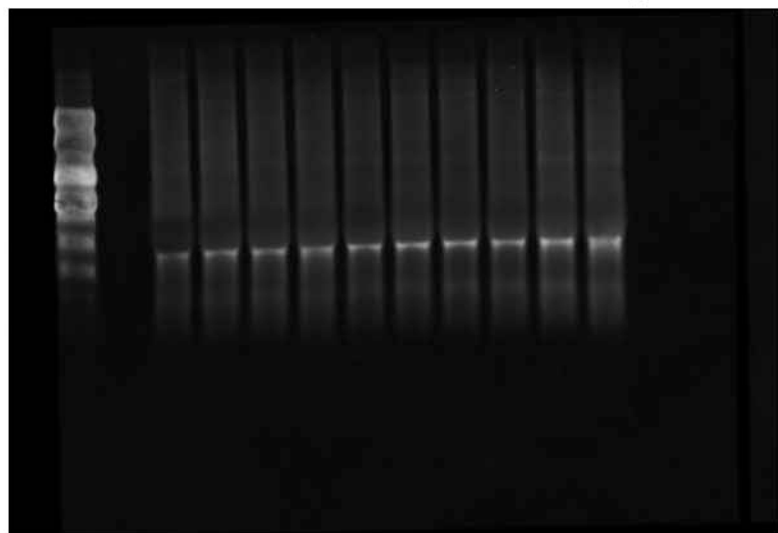

unedited northern, ITS2 probe

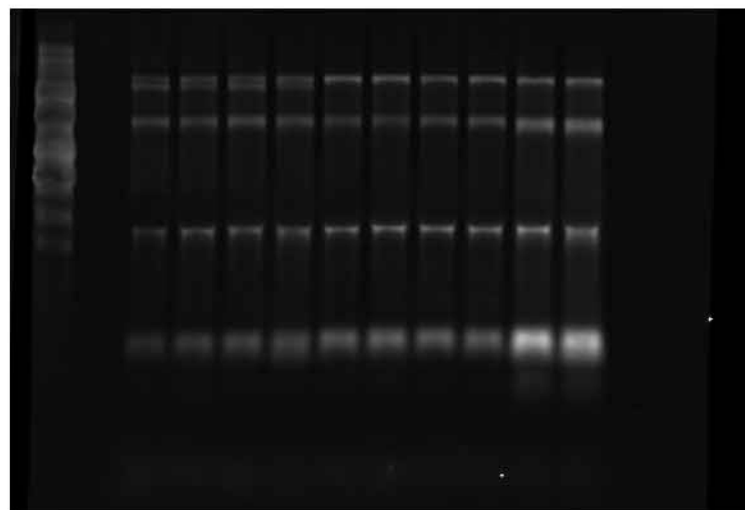

unedited northern, 18S probe

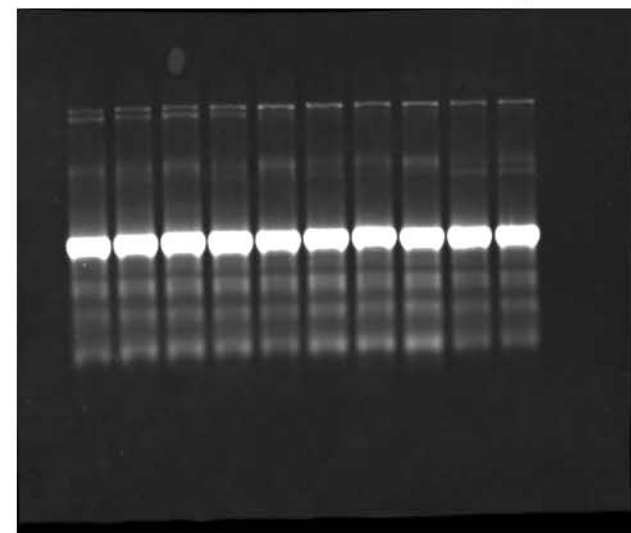

labelled northern, tubulin probe

marker  
 RpS17<sup>+/-</sup>  
 RpS17<sup>+/-</sup>; Xrp1<sup>+/-</sup>  
 RpS3<sup>+/-</sup>  
 RpS3<sup>+/-</sup>; Xrp1<sup>+/-</sup>  
 RpS18<sup>+/-</sup>  
 RpS18<sup>+/-</sup>; Xrp1<sup>+/-</sup>  
 wild type  
 Xrp1<sup>+/-</sup>  
 RpL27A<sup>+/-</sup>  
 RpL27A<sup>+/-</sup>; Xrp1<sup>+/-</sup>

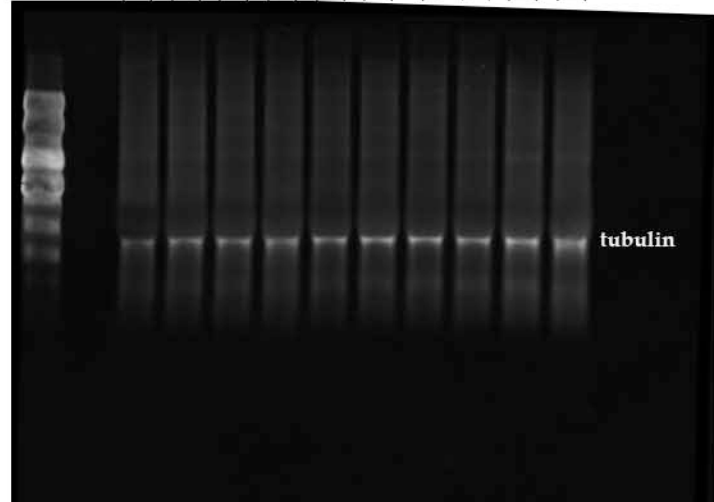

labelled northern, ITS2 probe

marker  
 RpS17<sup>+/-</sup>  
 RpS17<sup>+/-</sup>; Xrp1<sup>+/-</sup>  
 RpS3<sup>+/-</sup>  
 RpS3<sup>+/-</sup>; Xrp1<sup>+/-</sup>  
 RpS18<sup>+/-</sup>  
 RpS18<sup>+/-</sup>; Xrp1<sup>+/-</sup>  
 wild type  
 Xrp1<sup>+/-</sup>  
 RpL27A<sup>+/-</sup>  
 RpL27A<sup>+/-</sup>; Xrp1<sup>+/-</sup>

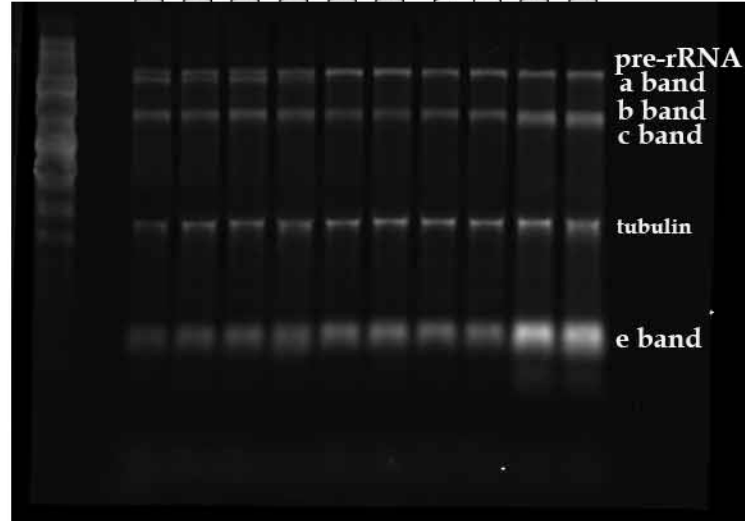

labelled northern, 18S probe

RpS17<sup>+/-</sup>  
 RpS17<sup>+/-</sup>; Xrp1<sup>+/-</sup>  
 RpS3<sup>+/-</sup>  
 RpS3<sup>+/-</sup>; Xrp1<sup>+/-</sup>  
 RpS18<sup>+/-</sup>  
 RpS18<sup>+/-</sup>; Xrp1<sup>+/-</sup>  
 wild type  
 Xrp1<sup>+/-</sup>  
 RpL27A<sup>+/-</sup>  
 RpL27A<sup>+/-</sup>; Xrp1<sup>+/-</sup>

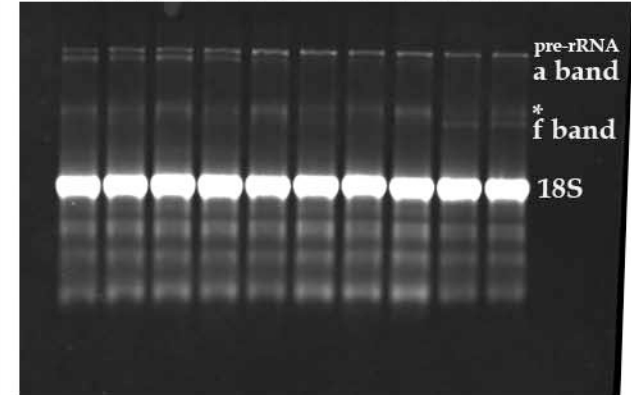

Supplement: fig2-data2 [file elife-71705-fig2-data2-v3.pdf]
