# Supplementary material for: The transcription factor Xrp1 orchestrates both reduced translation and cell competition upon defective ribosome assembly or function
Source: eLife journal article supplement (doi:10.7554/elife.71705), 2022-02-18

Figure 2 source data file 3  
unedited northern  
28S probe

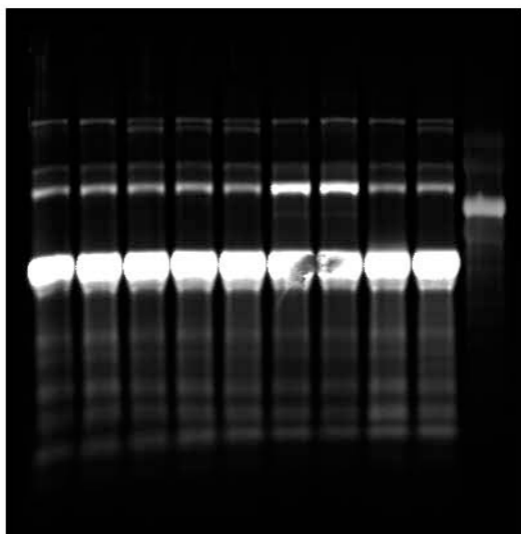

labelled northern  
28S probe

wild type  
*Xrp1*<sup>+/-</sup>  
*RpS3*<sup>+/-</sup>  
*RpS3*<sup>+/-</sup>; *Xrp1*<sup>+/-</sup>  
*RpS3*<sup>+/-</sup>  
*RpL27A*<sup>+/-</sup>  
*RpL27A*<sup>+/-</sup>; *Xrp1*<sup>+/-</sup>

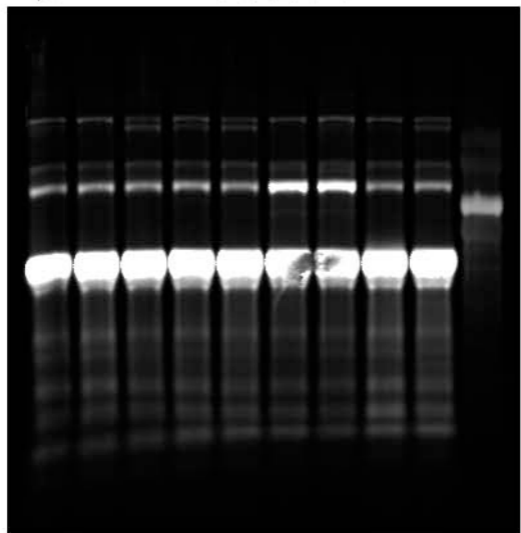

Supplement: fig2-data3 [file elife-71705-fig2-data3-v3.pdf]
