# Supplementary material for: The transcription factor Xrp1 orchestrates both reduced translation and cell competition upon defective ribosome assembly or function
Source: eLife journal article supplement (doi:10.7554/elife.71705), 2022-02-18
Supplement: fig2-figsupp1-data1 [file elife-71705-fig2-figsupp1-data1-v3.pdf]

Figure 2 figure supplement 1 source data

unedited northern, 7SL probe

unedited northern, 5.8S probe

unedited northern, 18S probe

labelled northern, 7SL probe

labelled northern, 5.8S probe

labelled northern, 18S probe

wild type  
Xrp1<sup>+/-</sup>  
RpL27A<sup>+/-</sup>  
RpL27A<sup>+/-</sup>  
RpL27A<sup>+/-</sup>; Xrp1<sup>+/-</sup>  
RpS3<sup>+/-</sup>  
RpS3<sup>+/-</sup>; Xrp1<sup>+/-</sup>  
RpS17<sup>+/-</sup>  
RpS17<sup>+/-</sup>  
RpS17<sup>+/-</sup>; Xrp1<sup>+/-</sup>  
RpS18<sup>+/-</sup>  
100% wild type  
75% wild type  
50% wild type

wild type  
Xrp1<sup>+/-</sup>  
RpL27A<sup>+/-</sup>  
RpL27A<sup>+/-</sup>  
RpL27A<sup>+/-</sup>; Xrp1<sup>+/-</sup>  
RpS3<sup>+/-</sup>  
RpS3<sup>+/-</sup>; Xrp1<sup>+/-</sup>  
RpS17<sup>+/-</sup>  
RpS17<sup>+/-</sup>  
RpS17<sup>+/-</sup>; Xrp1<sup>+/-</sup>  
RpS18<sup>+/-</sup>  
100% wild type  
75% wild type  
50% wild type

wild type  
Xrp1<sup>+/-</sup>  
RpL27A<sup>+/-</sup>  
RpL27A<sup>+/-</sup>  
RpL27A<sup>+/-</sup>; Xrp1<sup>+/-</sup>  
RpS3<sup>+/-</sup>  
RpS3<sup>+/-</sup>; Xrp1<sup>+/-</sup>  
RpS17<sup>+/-</sup>  
RpS17<sup>+/-</sup>  
RpS17<sup>+/-</sup>; Xrp1<sup>+/-</sup>  
RpS18<sup>+/-</sup>  
100% wild type  
75% wild type  
50% wild type

7SL

e rRNA  
7SL\*  
5.8S rRNA

18S rRNA  
e rRNA  
7SL\*  
5.8S rRNA
