# Supplementary material for: The transcription factor Xrp1 orchestrates both reduced translation and cell competition upon defective ribosome assembly or function
Source: eLife. 2022 Feb 18;11:e71705. doi: 10.7554/eLife.71705 (PMC8933008; doi:10.7554/eLife.71705)
Supplement: Figure 1—source data 2. [file elife-71705-fig1-data2.xlsx]

## Sheet: Sheet1
Figure 1 source data file 2
normalized northern signals
5.8S/7SL	Xrp1 +/+	Xrp1 +/+	Xrp1 +/+	Xrp1 +/-	Xrp1 +/-	Xrp1 +/-
wt	1.02058	0.984423	1.00117	1.0606	1.09844	0.947399
RpS18	1.16819	1.18063	1.06823	1.19201	1.14064	1.00292
RpS3	0.96258	1.2147	0.98838	0.92169	1.16224	0.917453
RpL27A	0.899205	0.959859	0.712621	0.905295	0.940635	0.735906
RpL14	0.820111	0.896906	0.799999	0.823779	0.858862	0.796536
18S/7SL
wt	0.98066	1.02176	0.923824	0.775912	1.03969	0.857298
RpS18	0.652527	0.764442	0.719992	0.684388	0.815923	0.677902
RpS3	0.731234	0.750189	0.705767	0.728359	0.827328	0.664156
RpL27A	0.71549	0.868127	0.616141	0.573162	0.777739	0.667853
RpL14	0.78888	0.982948	0.84508	0.81946	0.898127	0.82564
