# Supplementary material for: The transcription factor Xrp1 orchestrates both reduced translation and cell competition upon defective ribosome assembly or function
Source: eLife. 2022 Feb 18;11:e71705. doi: 10.7554/eLife.71705 (PMC8933008; doi:10.7554/eLife.71705)
Supplement: Figure 10—figure supplement 1—source data 1. [file elife-71705-fig10-figsupp1-data1.xlsx]

## Sheet: Sheet1
Figure 10 figure supplement 1 source data file 1
normalized luciferase levels, hsp70 core promoter
	Target 1	Target 1	Target 1	Target 3	Target 3	Target 3	Shuffled	Shuffled	Shuffled			Target 2	Target 2	Target 2	Target 2 shuffled	Target 2 shuffled	Target 2 shuffled
-/-	1	1	1	1	1	1	1	1	1		-/-	1	1	1	1	1	1
Xrp1	7.14087	7.91238	10.3647	2.76877	2.33036	2.54498	1.81185	1.75169	1.7925		Xrp1	4.16087	4.55252	5.15533	2.31983	2.4199	1.9835
Irbp18	0.977381	0.915851	0.682041	1.02981	1.06738	0.974787	0.959004	0.945669	0.971248		Irbp18	1.00853	1.15724	1.00753	1.03995	1.1523	0.99855
Xrp1 + Irbp18	22.1014	26.9888	24.3278	3.0285	4.53221	4.39267	1.71485	1.69317	1.65121		Xrp1 + Irbp18	4.29724	3.7786	3.94114	1.80595	2.22367	0.993061
