# Supplementary material for: The transcription factor Xrp1 orchestrates both reduced translation and cell competition upon defective ribosome assembly or function
Source: eLife. 2022 Feb 18;11:e71705. doi: 10.7554/eLife.71705 (PMC8933008; doi:10.7554/eLife.71705)
Supplement: Figure 10—source data 1. [file elife-71705-fig10-data1.xlsx]

## Sheet: Sheet1
Figure 10 source data file 1
normalized luciferase levels, Xrp1 core promoter
	Target 1	Target 1	Target 1	Target 1 shuffled	Target 1 shuffled	Target 1 shuffled			Target 2	Target 2	Target 2	Target 2 shuffled	Target 2 shuffled	Target 2 shuffled
-/-	1	1	1	1	1	1		-/-	1	1	1	1	1	1
Xrp1	3.36768	2.87924	4.01822	1.48113	1.28961	1.22594		Xrp1	6.72012	5.21226	4.64236	1.04246	1.37458	1.25224
Irbp18	1.06736	0.987162	0.903608	0.967236	1.14072	1.07061		Irbp18	0.937486	1.05988	1.02574	1.03913	1.07217	1.11671
Xrp1 + Irbp18	5.36493	8.13853	5.57138	1.45236	1.3679	1.24709		Xrp1 + Irbp18	4.81519	5.10098	4.32431	0.945989	1.27912	1.18756
