# Supplementary material for: The transcription factor Xrp1 orchestrates both reduced translation and cell competition upon defective ribosome assembly or function
Source: eLife. 2022 Feb 18;11:e71705. doi: 10.7554/eLife.71705 (PMC8933008; doi:10.7554/eLife.71705)
Supplement: Figure 10—source data 3. [file elife-71705-fig10-data3.xlsx]

## Sheet: Sheet1
Figure 10 source data file 3
Mean wing pouch GFP fluorescence
GstD1-GFP	RpS17+/-	13.231
GstD1-GFP	RpS17+/-	12.706
GstD1-GFP	RpS17+/-	11.273
GstD1-GFP	RpS17+/-	12.082
GstD1-GFP	RpS17+/-	11.108
GstD1-GFP	RpS17+/-	11.603
GstD1-GFP	RpS17+/+	7.981
GstD1-GFP	RpS17+/+	6.692
GstD1-GFP	RpS17+/+	5.694
GstD1-GFP	RpS17+/+	5.889
GstD1-GFP	RpS17+/+	7.818
mutant Xrp1 sites	RpS17+/-	10.117
mutant Xrp1 sites	RpS17+/-	6.17
mutant Xrp1 sites	RpS17+/-	5.995
mutant Xrp1 sites	RpS17+/-	6.018
mutant Xrp1 sites	RpS17+/-	5.947
mutant Xrp1 sites	RpS17+/-	6.24
mutant Xrp1 sites	RpS17+/+	8.289
mutant Xrp1 sites	RpS17+/+	8.608
mutant Xrp1 sites	RpS17+/+	8.654
mutant Xrp1 sites	RpS17+/+	7.454
mutant Xrp1 sites	RpS17+/+	8.306
