# Supplementary material for: The transcription factor Xrp1 orchestrates both reduced translation and cell competition upon defective ribosome assembly or function
Source: eLife. 2022 Feb 18;11:e71705. doi: 10.7554/eLife.71705 (PMC8933008; doi:10.7554/eLife.71705)
Supplement: Figure 10—source data 4. [file elife-71705-fig10-data4.xlsx]

## Sheet: Copia analysis
		GSE112864												GSE124924
		frt82_w_1	frt82_w_2	frt82_w_3	M67_w_1	M67_w_2	M67_w_3	M95_w_1	M95_w_2	M95_w_3	m2_73_M95_1	m2_73_M95_2	m2_73_M95_3	m2-73_w_1	m2-73_w_2	m2-73_w_3	ny1_ny1_1	ny1_ny1_2	ny1_ny1_3	ny1_ny1M95_1	ny1_ny1M95_2	ny1_ny1M95_3
FBti0060084	copia{}2023	0	0	0	0	0	0	0	0	0	0	0	0	0	0	0	0	0	0	0	0	0
FBti0060311	copia{}2250	0	0	0	0	0.000557387	0	0.000556569	0.000278472	0.000835705	0.000278662	0.000278912	0	0.000556675	0.000278273	0.000278537	0.000557079	0.00162458	0.000558703	0.000556971	0.00139149	0
FBti0062096	copia{}4035	0	0.000138397	0	0	6.92797e-05	0.000173234	6.91781e-05	0.000138449	0	0	6.93342e-05	0	0.000207574	0	0	6.92414e-05	6.73086e-05	6.94433e-05	6.9228e-05	6.91813e-05	0.000138489
FBti0064246	copia{}6185	0	0	0	0	0	0	0	0	0	0	0	0	0	0	0	0	0	0	0	0	0
FBti0063913	copia{}5852	0.000165781	9.94168e-05	0.000133056	0.000132674	0.000331778	0.000730057	9.93874e-05	0.000132606	6.63258e-05	6.63481e-05	0.000398446	0.000132735	0.000231948	3.31278e-05	0	0.000198957	0	0.000199537	0.000198918	0.000430698	0.000530574
FBti0060309	copia{}2248	0.000470185	0.000445208	0.000471716	0.000618896	0.00118861	0.00108978	0.000420349	0.00081652	0.000816803	0.000495199	0.000569991	0.000297207	0.000420429	0.000791213	0.000272237	0.000395985	0.000721746	0.000446782	0.000717583	0.000791282	0.000495003
FBti0019792	copia{}434	0.000569095	0.0007584	0.00152253	0.0276114	0.0283784	0.0255362	0.0254936	0.023614	0.0213454	0.00161331	0.00427435	0.00417684	0.00218017	0.00293781	0.00294059	0.00227661	0.001752	0.00228324	0.00407813	0.00521269	0.00455341
FBti0059745	copia{}1684	0.0160823	0.0145777	0.0155877	0.354604	0.3378	0.314835	0.346842	0.350694	0.319748	0.0343101	0.0345244	0.0428264	0.0243427	0.0204841	0.020356	0.0281144	0.0337981	0.0265066	0.0572812	0.043941	0.0486648
FBti0019822	copia{}466	0.0182543	0.0168817	0.0171426	0.408948	0.397554	0.359908	0.43151	0.422284	0.388738	0.0404255	0.0397819	0.0463206	0.0281173	0.0244988	0.0244326	0.0287333	0.0343003	0.0298983	0.0596589	0.0462345	0.0520665
FBti0019469	copia{}1467	0.0184938	0.0170848	0.018034	0.452874	0.432699	0.395397	0.492204	0.505557	0.482968	0.0661462	0.0654121	0.0813475	0.0356247	0.0277169	0.028786	0.073482	0.0800555	0.0649831	0.146536	0.118325	0.127634
FBti0020031	copia{}920	0.0196077	0.0171435	0.0191917	0.439115	0.42948	0.39372	0.446413	0.4408	0.40145	0.0395108	0.0434011	0.0508462	0.0291542	0.0253423	0.0261421	0.0298869	0.0363158	0.0303309	0.0643284	0.0486552	0.0540251
FBti0019110	copia{}293	0.0199758	0.01802	0.0182493	0.415123	0.400229	0.366108	0.424145	0.425579	0.385797	0.0387999	0.041088	0.0469012	0.0278094	0.0242228	0.0243886	0.0296214	0.0345928	0.029248	0.0599336	0.0493955	0.051804
FBti0020099	copia{}988	0.020221	0.0176566	0.018821	0.405307	0.388241	0.367034	0.415003	0.420572	0.381625	0.0407896	0.0416515	0.051475	0.0320704	0.0257183	0.0262413	0.0325785	0.0373647	0.0322915	0.0686343	0.0545894	0.0584832
FBti0019193	copia{}399	0.0204242	0.018158	0.0201382	0.450018	0.434681	0.397836	0.465607	0.468962	0.428519	0.0408645	0.0435667	0.0498277	0.0330034	0.0268738	0.0262621	0.0294304	0.0365976	0.0284531	0.0629934	0.0504143	0.0531224
FBti0019568	copia{}49	0.0204778	0.0175926	0.0198037	0.466418	0.442952	0.412896	0.482564	0.477232	0.436577	0.0425744	0.0464946	0.0553999	0.0314978	0.0282422	0.0277211	0.0320388	0.038178	0.0317679	0.0672803	0.0531751	0.0575711
FBti0019468	copia{}1466	0.0205354	0.0181496	0.0199987	0.449218	0.437841	0.404327	0.465716	0.469858	0.424474	0.0442988	0.0432889	0.0541291	0.029272	0.0243797	0.0246411	0.0353865	0.0412947	0.0338111	0.0748386	0.0598091	0.0628777
FBti0019050	copia{}122	0.0205369	0.0181667	0.0193619	0.43792	0.427049	0.399261	0.453708	0.454893	0.407547	0.0396341	0.0421084	0.0496317	0.028731	0.0249463	0.0240972	0.0302605	0.0351634	0.0305319	0.0638979	0.0497955	0.0540288
FBti0019183	copia{}387	0.0207058	0.0188753	0.019645	0.507066	0.47795	0.445203	0.523537	0.54204	0.5027	0.060377	0.0605742	0.0755916	0.0335129	0.0281548	0.0291277	0.0641647	0.0692165	0.0589567	0.129964	0.102385	0.109001
FBti0018969	copia{}840	0.0207834	0.017964	0.0195848	0.473158	0.465021	0.425549	0.471019	0.469538	0.426822	0.0399928	0.0408396	0.0514387	0.027321	0.0242394	0.0239171	0.0313479	0.0364921	0.0294388	0.0655588	0.0517192	0.0541898
FBti0020021	copia{}910	0.0208131	0.0176487	0.0200746	0.461729	0.444033	0.405618	0.474749	0.475931	0.436754	0.0435668	0.0477972	0.0544477	0.0314441	0.0289267	0.0274359	0.0320504	0.0383442	0.0326275	0.0684042	0.0530279	0.0586972
FBti0019586	copia{}67	0.0208627	0.0182223	0.0207156	0.468302	0.457986	0.419384	0.496781	0.48773	0.447552	0.0463098	0.0484436	0.0556047	0.0324493	0.0280944	0.0279603	0.0352171	0.0400496	0.0342749	0.0723488	0.0551112	0.0611265
FBti0020108	copia{}997	0.0209836	0.0176359	0.0193145	0.452882	0.44189	0.406604	0.461542	0.453659	0.413186	0.0405013	0.0446379	0.0530686	0.0299451	0.02643	0.0260623	0.0317523	0.0369466	0.0321373	0.0666639	0.0508606	0.0579482
FBti0018967	copia{}631	0.0213352	0.0189495	0.0196364	0.4518	0.440032	0.405047	0.48345	0.470201	0.430734	0.0355382	0.036399	0.0457454	0.0274751	0.022846	0.02335	0.0270603	0.0320359	0.026745	0.0580337	0.0447499	0.0485308
FBti0019117	copia{}302	0.0215139	0.0197708	0.0202219	0.477741	0.460714	0.422253	0.491477	0.482864	0.442354	0.0455533	0.0479258	0.0562581	0.0344852	0.0300567	0.0289419	0.0359156	0.0413619	0.0358113	0.0722757	0.0550553	0.0613647
FBti0019364	copia{}1349	0.0216508	0.0185032	0.0190808	0.466286	0.456114	0.416347	0.48442	0.474589	0.435934	0.0441591	0.0454213	0.0519672	0.0311229	0.0271832	0.0268278	0.0330333	0.0399899	0.0326339	0.06965	0.0535975	0.0595364
FBti0019176	copia{}372	0.0219605	0.0205088	0.0214167	0.513774	0.498169	0.458774	0.516031	0.512609	0.466213	0.0418833	0.044175	0.0523724	0.0311705	0.0264157	0.0264229	0.0335455	0.0395036	0.0334581	0.0675959	0.0538534	0.0581249
FBti0019405	copia{}1391	0.0220429	0.0198485	0.0200847	0.479946	0.473546	0.438148	0.5129	0.510281	0.464763	0.0427639	0.0434102	0.0546588	0.0314259	0.027637	0.0266039	0.0322582	0.0377565	0.0316001	0.0659915	0.0535663	0.057734
FBti0019113	copia{}298	0.0224011	0.020735	0.0221574	0.481601	0.482582	0.436205	0.500877	0.49916	0.453723	0.0438553	0.0463276	0.0552628	0.0322357	0.0278197	0.0267802	0.0348854	0.0404299	0.03522	0.0740322	0.0566439	0.0586669
FBti0019250	copia{}539	0.0228045	0.0207092	0.0229983	0.501815	0.487658	0.447347	0.517042	0.510386	0.466887	0.0416054	0.0429668	0.0529608	0.0308968	0.0269445	0.0252129	0.0335877	0.0373458	0.0319592	0.0685797	0.0535544	0.060233
FBti0018970	copia{}860	0.0228224	0.0202628	0.0217973	0.479103	0.465738	0.432689	0.49184	0.489747	0.445204	0.0412121	0.0430324	0.0511428	0.0292243	0.026397	0.0254929	0.0325871	0.0368189	0.0303583	0.0670552	0.053602	0.0567603
FBti0018968	copia{}837	0.0233028	0.0190226	0.0211113	0.507363	0.48884	0.454727	0.536283	0.539343	0.48376	0.0475949	0.0532841	0.0620677	0.0335415	0.0293918	0.0300562	0.0354515	0.0401168	0.0340037	0.0737021	0.0612195	0.062935
FBti0019151	copia{}342	0.0239446	0.0200407	0.0217768	0.511905	0.497584	0.458452	0.531516	0.521748	0.474822	0.0458125	0.0479642	0.0568251	0.0321938	0.027511	0.0284837	0.0378318	0.040914	0.0365388	0.0754941	0.058834	0.0639429
FBti0019059	copia{}131	0.0241947	0.0202014	0.0222367	0.500393	0.488951	0.452506	0.521207	0.513521	0.4672	0.0455265	0.047827	0.0575639	0.0325508	0.0285162	0.0271739	0.036379	0.0397159	0.0340248	0.0730832	0.0579774	0.0644609
FBti0020127	copia{}1016	0.0242278	0.0218132	0.0240269	0.449037	0.439217	0.401456	0.468911	0.464877	0.422562	0.0406626	0.0412102	0.0496005	0.0336059	0.0309065	0.029565	0.0300103	0.0357258	0.0284908	0.0629933	0.0488333	0.0554654
FBti0019136	copia{}324	0.0250282	0.021326	0.0225533	0.515925	0.499841	0.459131	0.530005	0.531992	0.475876	0.0472599	0.0493771	0.0592084	0.0314263	0.0289326	0.0284599	0.0368851	0.0417937	0.0355774	0.0739583	0.0586853	0.0645859
	SUM	0.597192	0.526911	0.566889	13.0077	12.6249	11.6243	13.4639	13.4116	12.2376	1.22398	1.27852	1.5291	0.869247	0.752869	0.744434	0.986994	1.13638	0.955237	2.03639	1.60551	1.7393
