# Supplementary material for: The transcription factor Xrp1 orchestrates both reduced translation and cell competition upon defective ribosome assembly or function
Source: eLife. 2022 Feb 18;11:e71705. doi: 10.7554/eLife.71705 (PMC8933008; doi:10.7554/eLife.71705)
Supplement: Supplementary file 1. [file elife-71705-supp1.xlsx]

## Sheet: rpkm
		GSE112864												GSE124924
te_id	te_name	frt82_w_1	frt82_w_2	frt82_w_3	M67_w_1	M67_w_2	M67_w_3	M95_w_1	M95_w_2	M95_w_3	m2_73_M95_1	m2_73_M95_2	m2_73_M95_3	m2-73_w_1	m2-73_w_2	m2-73_w_3	ny1_ny1_1	ny1_ny1_2	ny1_ny1_3	ny1_ny1M95_1	ny1_ny1M95_2	ny1_ny1M95_3
FBti0019256	invader2{}555	5.1738e-05	0.000243781	0.000133474	8.87269e-05	0.000184899	0.00031809	2.95405e-05	5.17306e-05	0.00014046	8.87416e-05	5.92142e-05	0.00011096	4.43191e-05	6.64633e-05	8.87018e-05	0.00011827	0.000150896	5.1894e-05	0.000103466	9.60109e-05	9.60986e-05
FBti0019258	frogger{}558	0.000148061	0.000604269	0.000185679	2.46861e-05	0.000185197	0.000975565	9.86268e-05	0.00011103	0.000172773	9.87606e-05	0.000148274	9.87896e-05	0.000110976	0.000197246	0.000209772	0.000160415	0.000311875	0.000111381	9.8698e-05	7.39735e-05	9.87214e-05
FBti0019259	gypsy6{}559	0.000569977	0.000284841	0.000285917	0.000142548	0.000570349	0.00156877	0.000284756	0.000712369	0.000712616	0.000142571	0.000285399	0	0.000712026	0.000427117	0	0	0.00013853	0.000142924	0.000142481	0.000284769	0
FBti0019877	G4{}570	0.000431497	0.000431273	0	0.000143886	0	0.00028791	0.000143715	0.000287623	0.000143862	0.00014391	0.000144039	0	0	0.000143709	0	0.000719233	0.000139831	0.000144266	0.000143819	0.000287443	0.000143853
FBti0019260	Doc3{}Marf1[571]	0	0	0	0	0.000170313	0	0	0.000170177	0	0	0	0.000340687	0	0	0	0	0	0.000682859	0.000340371	0.000340141	0.000340452
FBti0019261	X{}572	0	8.11136e-05	0.000223905	2.02965e-05	8.12087e-05	0.000284287	2.02724e-05	0	8.11722e-05	2.02999e-05	2.03181e-05	0	0	0	0	0	3.94491e-05	8.14004e-05	0	0	0
FBti0019878	Bari2{}574	0	0	0.000175134	0.000349262	0.00017468	0.000174714	8.72117e-05	0	0.000174601	0	8.74084e-05	0.000174711	0.000348913	0	0	0.000174583	0	0.000350184	0.000174549	0	0.000436477
FBti0019880	F{}579	0.000477134	0.000903949	0.000657302	0.000306335	0.000477445	0.00141837	0.000213468	0.000256334	0.000462985	0.00014963	0.000263871	0.000178184	0.000341613	0.00022769	7.12206e-05	0.000299129	0.000470784	0.000400001	0.000427244	0.000355796	0.000391733
FBti0019882	diver2{}581	0.000131128	0.00026212	0.000239191	4.77008e-05	7.15711e-05	0.000441443	9.52881e-05	0.00011919	7.15389e-05	1.19272e-05	0	4.77227e-05	3.57398e-05	7.14632e-05	0	0.000166907	8.11238e-05	0.000191307	7.15176e-05	2.38231e-05	2.38449e-05
FBti0019265	HMS-Beagle{}577	0.000100856	0.000211208	0.000245734	6.72626e-05	0.000100922	0.000254759	7.19814e-05	8.16338e-05	0.000100877	5.76633e-05	0.00011543	0.000124974	6.23957e-05	3.359e-05	4.80312e-05	9.60631e-05	9.33815e-05	0.00010116	0.000139264	9.11807e-05	0.000100871
FBti0019264	Rt1b{}576	5.89348e-05	0.000245434	0.00017738	7.86091e-05	0.000216235	0.000245771	5.88868e-05	9.82106e-05	2.94734e-05	2.94833e-05	9.8366e-05	0	1.96326e-05	1.96281e-05	0	2.94703e-05	7.63938e-05	0.000177337	0.000117858	5.88895e-05	5.89432e-05
FBti0019262	1360{}573	0.000479132	0.000169018	0.00014138	0.000338338	0.000225621	0.000225666	0.000168968	5.63604e-05	0.0002819	0.000310194	0.000395147	0.000141039	0.000253499	0.000225281	8.45605e-05	8.45612e-05	0.000301402	0.000141346	0.000112726	0.000168975	0.000225506
FBti0019876	1360{}569	0.000443201	0.000138429	8.33708e-05	0.000138552	0.000332618	0.000249513	0.000276775	0	5.54114e-05	5.54301e-05	5.54799e-05	0	5.53655e-05	8.30291e-05	0.00011081	5.54057e-05	0.000107718	0.000138918	0.000166185	0.000304466	0.000221632
FBti0019874	transib3{}567	0.000111162	0	4.46096e-05	4.44815e-05	0.000133482	4.45027e-05	0	0	4.44739e-05	4.44889e-05	4.45288e-05	0	0	0	4.44689e-05	0.000200112	2.1614e-05	0.000133797	4.44606e-05	0	8.89424e-05
FBti0019870	invader2{}563	6.67986e-05	0.000103181	0.000140125	3.64492e-05	0.000164067	0.000170178	6.67442e-05	7.28608e-05	7.2886e-05	7.89865e-05	9.12201e-05	6.68543e-05	0.000163858	7.28088e-05	2.42926e-05	9.71713e-05	0.00011217	4.87273e-05	7.28643e-05	0.000133494	0.000115396
FBti0019868	transib2{}561	0	8.14372e-05	0	0	0	0.000163098	0	0	0	0.000163047	0	0	0	0	0	0	0	0	0	0	0
FBti0019866	G5{}556	0.000102991	0.000253912	0.000165322	5.49489e-05	0.000288562	0.000343595	0.000178372	9.61108e-05	0.000137349	0.000206093	0.000116891	0.000109948	0.000178405	0.000178364	0.000130467	0.000130468	0.000146851	9.64144e-05	6.86539e-05	0.000144076	0.000151075
FBti0019254	gypsy4{}553	0.000967461	0.00149188	0.00115087	0.00244721	0.00273832	0.00293252	0.00112778	0.00188398	0.00167267	0.00162253	0.00185928	0.00155384	0.00103592	0.000925206	0.00109195	0.00230371	0.00248126	0.00261078	0.00241382	0.00256871	0.00271849
FBti0019647	Rt1c{}175	0.000156441	0.000312719	0.000235425	0.000365165	0.000939256	0.000678487	0	0.000104279	0.000104315	0	0	0	0.000104228	2.60511e-05	0	0	0	0.000104608	0	0	0
FBti0019648	297{}176	0.000472915	0.000197662	0.000336431	0.000172033	0.000240914	0.000180721	0.000103097	6.87777e-05	8.6002e-05	0.000232284	9.47191e-05	0.000206535	0.000300757	0.000180413	0.000137588	0.000137589	0.00010867	0.000120741	0.000197746	0.000154653	0.000128995
FBti0019650	Rt1c{}178	0.000159749	8.87033e-05	7.12307e-05	0	1.77615e-05	8.8825e-05	3.54708e-05	3.54946e-05	0.000106521	7.10378e-05	0	0	3.54775e-05	3.54694e-05	7.1006e-05	3.55033e-05	3.45122e-05	5.34102e-05	0.000106489	0.000177362	7.10096e-05
FBti0019651	Rt1c{}179	7.16219e-05	7.15848e-05	0.000197602	5.37365e-05	1.79172e-05	7.1683e-05	0	3.58058e-05	0	7.16606e-05	0	3.58408e-05	1.78943e-05	3.57803e-05	0	0	3.48148e-05	3.59189e-05	3.58076e-05	5.36751e-05	0
FBti0019652	Rt1c{}180	0.000108575	0.000126605	0.000163393	1.81026e-05	0.000253507	3.62226e-05	3.61622e-05	1.80933e-05	0.000108597	3.62113e-05	0	7.24438e-05	3.61691e-05	0	0	0	1.75925e-05	3.63008e-05	3.61883e-05	0	0
FBti0019653	Rt1c{}181	0.000212998	0.000230629	0.000160269	0	8.88073e-05	0.0003553	7.09416e-05	0.000141979	0.000142028	3.55189e-05	3.55508e-05	7.10587e-05	0	0.000141877	3.5503e-05	7.10066e-05	5.17683e-05	5.34102e-05	0	0	0
FBti0019649	3S18{}177	0	8.15185e-05	0	0	0	3.06114e-05	1.01868e-05	0	2.03943e-05	0	1.02098e-05	0	0	0	0	0	0	2.04517e-05	0	0	0
FBti0020244	1360{}1133	0.00153773	0.00106403	0.00166141	0.000828317	0.000680593	0.00115428	0.00112281	0.00147837	0.001331	0.00103557	0.000947656	0.000739909	0.00153677	0.0012114	0.000709786	0.000325321	0.000229993	0.000237287	0.000443534	0.000177294	0.000384487
FBti0020246	Stalker{}1135	0.000284467	0.000396325	0.000423766	0.000388055	0.000405415	0.000802364	0.000310075	0.000387854	0.000405233	0.000681366	0.000517958	0.000276077	0.000335978	0.000266998	0.00033622	0.000293117	0.000569869	0.000484188	0.000646456	0.000559884	0.000672474
FBti0020252	Stalker{}1141	0	0.000896831	0	0.000256466	0	0.000256589	0	0.000256334	0	0.000513018	0.000256739	0.000513169	0.000128105	0	0.000128197	0.000256396	0.000249239	0.000642859	0.000384519	0.00038426	0.000256407
FBti0020253	Cr1a{}1142	0.000162588	0.000162504	9.32101e-05	0.000139414	0.000255663	0.000302207	6.96239e-05	0.000301906	6.96949e-05	4.64789e-05	0.000186083	4.64925e-05	2.32124e-05	2.3207e-05	4.6458e-05	0.000162605	6.77423e-05	0.000116485	0.000232247	0.000139254	0.000232302
FBti0020255	Rt1b{}1144	3.9052e-05	3.90317e-05	0.000235075	1.95333e-05	5.86162e-05	0.000117256	7.80403e-05	5.85696e-05	0.0001953	5.86096e-05	5.86623e-05	0	9.75689e-05	1.95093e-05	1.95278e-05	7.81118e-05	7.59313e-05	0	9.76207e-05	5.85329e-05	5.85863e-05
FBti0020257	opus{}1146	0.00141944	0.000591127	0.000474688	0.000414159	0.000355092	0.000177581	0.00100462	0.00130097	0.00065071	0.00088763	0.00100688	0.00065112	0.000531957	0.000531835	0.00118298	0.000177448	0.000172494	0.00035593	0.000177413	0.000709175	0.000709822
FBti0020258	invader5{}1147	0	0	0	0	0	0	0	0	0	0	0	0	0	0	0	0	0	0	0	0	0
FBti0020261	S{}1150	0.000336662	0.000265648	0.000319982	0.000141806	0.000212768	0.000461089	0.000247865	0.000283464	0.000159504	0.000159558	0.000301658	0.000195072	0.000318744	0.000106223	0.000106324	0.000230371	0.000310071	0.00021327	0.000336631	0.000442636	0.000301267
FBti0020265	F{}1154	0.00109951	0.00201472	0.00192205	0.000699948	0.00159199	0.00346807	0.000965446	0.000907796	0.00105807	0.000925085	0.000934258	0.000475183	0.000532761	0.000565928	0.000358206	0.00108296	0.0011499	0.000860536	0.00119935	0.000749088	0.000808087
FBti0020266	HB{}1155	0	0	0	0	0	0	0	0	0	0	0	0	0	0	0	0	0	0	0	0	0
FBti0020267	S{}1156	0	0.000141597	0.000106599	7.08618e-05	0.000124043	0.000319031	0.000141555	3.54126e-05	0.000212549	3.54368e-05	0.000159609	5.31708e-05	0.000106186	5.3081e-05	7.08418e-05	0.000141685	8.6081e-05	7.10489e-05	5.31215e-05	0.000194647	0.000141691
FBti0020268	opus{}1157	0.000766488	0.000886807	0.000782965	0.000399652	0.000511325	0.000767141	0.000761221	0.00109151	0.000785229	0.00114803	0.00130258	0.00112977	0.000677801	0.000598741	0.000794433	0.00024623	0.000424518	0.000354113	0.000668871	0.000835525	0.000771243
FBti0020269	aurora{}1158	6.86472e-05	0.000156827	0.000245967	1.96208e-05	2.94394e-05	0.000137411	1.95975e-05	1.96107e-05	5.88524e-05	3.92482e-05	0	0	9.80061e-06	3.91934e-05	0	1.96155e-05	3.81358e-05	1.96726e-05	0	0	1.96163e-05
FBti0020272	Cr1a{}1161	0.000170676	5.68624e-05	0.000171231	0.000113826	0.000113858	0.000640579	5.68455e-05	4.26628e-05	7.11293e-05	0.000113845	0.000128191	7.11742e-05	0.000142141	4.26324e-05	7.11214e-05	0.000199141	9.67912e-05	0.00017119	7.11081e-05	8.52722e-05	0.000128025
FBti0020273	1360{}1162	0.000232386	0.000154844	0.000466286	0.000542438	0.000193782	0.000581461	0.000464394	0.000232353	0.000193695	0.000155008	0.000349081	0.000387634	0.000309655	0.000232187	0.000193673	0.000774699	0.000263576	0.000233087	0.000232364	0.000425714	0.000387366
FBti0020275	Rt1a{}1164	1.67137e-05	0.000116935	2.51522e-05	1.672e-05	9.19855e-05	0.000108732	1.67001e-05	0	3.34343e-05	0	0	0	2.50549e-05	6.67977e-05	1.67153e-05	0.000133723	0.000121866	5.02924e-05	5.01365e-05	0.000100205	0.000133729
FBti0020271	1360{}1160	0	0.000223506	0.00013461	0.000223706	8.95074e-05	4.47626e-05	8.93761e-05	0.000402463	0	0.000178995	0.000134367	0.000268571	0.000178786	0.000134059	0	8.94579e-05	0.000173921	8.97187e-05	0.000134161	8.93802e-05	4.47309e-05
FBti0020270	Cr1a{}1159	0.000308147	0.000421456	0.000276608	0.00011357	0.000308348	0.000811604	0.000210665	0.000129727	0.000291988	0.000146043	0.000162416	0.000129854	0.000194497	0.000162044	0.000113538	0.000178419	0.000252273	0.00022774	0.000518935	0.000162058	0.000162206
FBti0020264	gypsy2{}1153	0.000444562	0.000914297	0.000497472	0.000128287	0.000346471	0.000984003	0.000226371	0.000235071	0.000316387	9.40927e-05	9.8458e-05	4.2782e-05	0.000200782	0.000166568	4.70252e-05	0.000299254	0.000274277	0.000248676	0.000183792	0.000140954	0.000119707
FBti0020263	F{}1152	0.000653904	0.000883196	0.000895396	0.000716027	0.00101687	0.00175113	0.000573907	0.000538951	0.000698228	0.000636574	0.000504407	0.000442195	0.00044155	0.000406133	0.00026512	0.000662807	0.00059276	0.000522928	0.000698021	0.000547444	0.00064516
FBti0020262	HB{}1151	0	0	0.000389064	0	0	0	0	0	0	0	0	0	0	0	0	0	0	0	0	0	0
FBti0020260	opus{}1149	0.000665828	0.000738972	0.000598328	0.000302391	0.000363788	0.000527393	0.000636715	0.000751502	0.000698649	0.00102585	0.00112495	0.00100162	0.000632754	0.000448947	0.000698571	0.000314564	0.000150906	0.000360549	0.000518725	0.000436741	0.000714949
FBti0020259	Doc3-element{}1148	0.000732159	0.00301859	0.0013084	0.000480659	0.00290765	0.0109688	0.000891591	0.000869314	0.00109846	0.000732555	0.00107691	0.000618274	0.00052591	0.000685811	0.000205939	0.000800879	0.000311409	0.000826162	0.00118965	0.000617284	0.00070938
FBti0020256	Stalker{}1145	0	0.000323455	0	0	0	0.000215932	0	0	0.000215792	0	0	0	0	0	0	0	0.000104873	0	0	0	0
FBti0020254	R1A1{}1143	0	0.000112163	0	0	0.000224588	0	0	0	0	0	0	0	0	0	0	0	0	0	0.00011221	0	0
FBti0020251	Quasimodo{}1140	8.14176e-05	0.000204601	0.000105021	2.7925e-05	7.68153e-05	0.000237476	3.48648e-05	6.97765e-05	6.04939e-05	5.12044e-05	3.7273e-05	1.39689e-05	4.64952e-05	1.39454e-05	2.79172e-05	0.000102364	7.46297e-05	4.66646e-05	3.2564e-05	6.74084e-05	5.35106e-05
FBti0020249	1360{}1138	0	5.00742e-05	0	5.0119e-05	2.50665e-05	0	0	0	0	2.50636e-05	0	0	0	0	0	5.01052e-05	0	0	5.00955e-05	5.00617e-05	5.01074e-05
FBti0020247	invader1{}1136	0.000127829	0.000153315	0.000119695	0.000161977	0.000213187	0.00052028	0.000110695	0.000221538	0.000161949	0.000144951	5.97392e-05	0.00017058	6.81326e-05	4.25731e-05	2.55681e-05	0.000178978	0.000165697	0.000136762	0.000170422	0.000136246	0.000127847
FBti0020276	Rt1b{}1165	7.32633e-05	2.44084e-05	9.80025e-05	0.000146581	0.000158841	0.00037885	8.54042e-05	0.000134297	0	0.000146606	8.55969e-05	7.33244e-05	6.10146e-05	0.000122001	2.44233e-05	9.76942e-05	0.000332385	0.000146968	0.000293026	4.88046e-05	0.000293095
FBti0020283	S2{}1172	0.000288749	2.88599e-05	5.79379e-05	8.66571e-05	8.66813e-05	0.000173397	0.000144257	8.66123e-05	0	0	0.000144582	0	0	0	0	0	0	2.8962e-05	5.77444e-05	0	0
FBti0020286	Helena{}1175	8.52191e-05	0.00051105	0.000448857	6.39383e-05	0.000405055	0.0013007	4.25748e-05	0.00012781	0.000170473	4.26326e-05	0.000170684	8.52902e-05	0.00014904	6.38596e-05	8.52269e-05	0.000213069	0.000144985	0.000192321	0.000149119	0.000340614	0.000106539
FBti0020287	Cr1a{}1176	0	0	9.88297e-05	0	3.28577e-05	3.28643e-05	3.28095e-05	0	0	0	3.28836e-05	0	0	0	3.28393e-05	0	0	6.58706e-05	3.28332e-05	0	0
FBti0020290	invader1{}1179	0	0	0	0.000978119	0.000652261	0.000434928	0.000542754	0.000434495	0.000543307	0	0	0	0	0	0	0	0.000105617	0	0.000325887	0	0
FBti0020292	hopper{}1181	0	0.000171543	0	8.5848e-05	0.000236148	0.000214723	2.14365e-05	0	0	0	2.14848e-05	0	0	0	0	0.000343298	0.000667429	0.000774672	0.000364683	0.000343	0.000600797
FBti0020293	invader1{}1182	0.00275431	0.00324788	0.00318169	0.0568191	0.0606083	0.0512547	0.0766759	0.0850934	0.0847231	0.00748499	0.00879689	0.00580888	0.00246604	0.0020835	0.00251126	0.00815948	0.00678292	0.00727692	0.0178014	0.0127712	0.0155463
FBti0020291	1360{}1180	0.000133254	9.68617e-05	0.000109381	0.000351437	0.000266682	0.000630464	0.000193666	3.63367e-05	6.05823e-05	4.84821e-05	3.63943e-05	8.48687e-05	1.21064e-05	4.84145e-05	4.84604e-05	0.000557299	0.000459303	0.000607526	0.000411837	0.000605234	0.000630018
FBti0020289	G6{}1178	0.000339837	0.000696304	0.000664839	3.39964e-05	0.00028905	0.00051019	6.79119e-05	0	0.000169953	6.80041e-05	6.80651e-05	3.4012e-05	3.39624e-05	0	3.39868e-05	0.000237909	0	6.81723e-05	0.000169902	0	3.39885e-05
FBti0020288	Cr1a{}1177	0.000197816	0.000328121	0.000396921	0.000429464	0.0004717	0.000652929	0.000302791	0.000248287	0.000256793	0.000332679	0.000354053	0.00023168	0.000151424	0.000151389	0.000185207	0.000395672	0.000400994	0.00035461	0.000450305	0.000433179	0.000572487
FBti0020284	X{}1173	0.000255302	0.00025517	0.000224117	6.38495e-05	0.000127734	0.00113919	5.31446e-05	0.000138269	0.000191516	8.51467e-05	0.000149141	0.000106465	5.31547e-05	6.37709e-05	2.12771e-05	5.31933e-05	0.00018615	9.6027e-05	0.000159549	8.50353e-05	2.12782e-05
FBti0020282	1360{}1171	0.00100939	0.0017996	0.00139585	0.000600401	0.000737061	0.000627992	0.000981306	0.000681921	0.000573012	0.000409432	0.00049176	0.000273035	0.000599801	0.000490633	0.000218266	0.00163701	0.00122	0.00207959	0.00141846	0.00133573	0.00136423
FBti0020281	Cr1a{}1170	0	0	0	0.000116753	0.000116786	0	0	0	0.000116733	0	0	0	0	0	5.83602e-05	0	0	0	0	0	5.83632e-05
FBti0020280	invader2{}1169	0.000630177	0.00124759	0.000924026	0.000545549	0.00121873	0.00195279	0.000484356	0.000587676	0.00077576	0.000715394	0.000861672	0.000454833	0.000793283	0.0006478	0.000369657	0.0005454	0.000612646	0.000577378	0.00056347	0.000829498	0.000757532
FBti0020278	X{}1167	0.000291589	0.000362678	0.000513567	7.77861e-05	9.72597e-05	0.000272382	2.58979e-05	0.000116619	0.000149065	6.48325e-05	7.78689e-05	9.07922e-05	0.000168368	8.41647e-05	4.53624e-05	0.000136088	0.000170086	0.000116987	9.71871e-05	0.000129495	0.000155536
FBti0020221	Cr1a{}1110	0.000711424	0.000729057	0.000984782	0.000720699	0.000883102	0.00146011	0.000908801	0.000909412	0.000729583	0.000297338	0.000459935	0.000279399	0.000818976	0.00053986	0.000693477	0.000747521	0.000402724	0.000677439	0.000720362	0.000971832	0.000900666
FBti0020224	1360{}1113	0.000138751	0.000443774	0.000167044	0.000249846	0.000111073	0.000305513	0.000194093	0.000194224	0.000305315	0.000222122	0.000111161	2.77734e-05	0.000166397	8.31795e-05	5.55056e-05	0.000166518	0.000242805	0.000250505	0.000138738	0.000110916	0.000222034
FBti0020226	mariner2{}1115	0.000977011	0.00115088	0.00189037	0.00153588	0.00272345	0.00272399	0.0024754	0.00244218	0.00191952	0.0011521	0.000489209	0.000663525	0.0014646	0.00111563	0.000872411	0.000767728	0.000814142	0.000559975	0.00101181	0.000697328	0.000837558
FBti0020229	1360{}1118	0.000124034	6.19846e-05	0	0.00040326	0.000527486	0.000682766	0.000247865	0.000372047	0.000403191	3.10251e-05	9.3159e-05	3.10342e-05	0.000185934	3.09818e-05	0.000124045	0.000248092	0.000422041	0.000342121	0.000589104	0.000464768	0.000403167
FBti0020234	Cr1a{}1123	0.000419388	0.0013623	0.000820469	0.00060834	0.000755391	0.00151108	0.00081714	0.000545126	0.000650183	0.000545499	0.000671986	0.000587633	0.0003353	0.000314272	0.000377484	0.000650116	0.000876601	0.00048375	0.000817729	0.000712411	0.000817923
FBti0020235	R1A1{}1124	0.00437165	0.00951902	0.0064222	0.000242961	0.00203102	0.00458952	0.00223605	0.00236475	0.00351076	0.00157951	0.00162725	0.00141792	0.00110379	0.00121331	7.51808e-05	0.000861695	0.00164155	0.00109621	0.000398963	0.000780052	0.000173503
FBti0020236	Cr1a{}1125	0.000421238	0.000728013	0.000537066	0.000386279	0.000667395	0.000764144	0.000289365	0.000447501	0.000500322	0.000456588	0.000711862	0.000360107	0.00029819	0.00025428	0.000219415	0.000596813	0.000426583	0.000677773	0.000465073	0.000631371	0.000789934
FBti0020240	1360{}1129	0.00108832	0.00201235	0.000873493	0.000680456	0.000735097	0.000789706	0.00119618	0.00141462	0.000898049	0.00117058	0.00152584	0.00136154	0.00138674	0.00100584	0.00100679	0.000217686	0.000819987	0.000682252	0.000707343	0.000489368	0.000625875
FBti0020241	mariner2{}1130	0.00129721	0.00102068	0.00174448	0.000579822	0.00080093	0.000662971	0.000965221	0.000827889	0.000772964	0.00135314	0.000718639	0.00151928	0.00110332	0.000882452	0.000524453	0.00113172	0.000831806	0.00146722	0.0012143	0.001572	0.00110417
FBti0020243	1360{}1132	0.000581701	0.00130123	0.00108382	0.00141323	0.00149678	0.000803987	0.000802647	0.00102476	0.000748054	0.00038801	0.000471579	0.000499017	0.000802799	0.00110705	0.000941889	0.000166217	5.3859e-05	5.55672e-05	0.000138487	0.000110715	0.000221632
FBti0020242	gtwin{}1131	0.000901067	0.00277685	0.00173267	0.000901404	0.00180331	0.00225459	0.000600222	0.00120125	0.00127677	0.000901554	0.00105276	0.00105212	0.00187605	0.00172557	0.00135172	0.00127664	0.00146	0.00105441	0.00157672	0.00195081	0.00225299
FBti0020239	gtwin{}1128	0.000750889	0.00142595	0.001356	0.00142722	0.000901655	0.00172852	0.00127547	0.000600625	0.000751042	0.000751295	0.00112795	0.0021794	0.00135075	0.000900296	0.00135172	0.000901157	0.00219	0.0019582	0.00232754	0.00187578	0.00187749
FBti0020238	HB{}1127	0	0	0	0	0	0	0	5.63086e-05	0	0	0	0	0	0	0	0	0	0	0	0	0
FBti0020237	rooA{}1126	0	0	0	0	0	0	0	0	0	0	0	0	0	0	0	0.000148735	0	0	0	0	0
FBti0020233	G4{}1122	0.000493073	0.000262836	0.000313297	0.00034528	0.000904557	0.000954087	0.000410559	0.000460136	0.000410978	0.00049334	0.000148135	0.000444136	0.000312084	0.000180639	0.000394495	0.000361623	0.000623164	0.000379162	0.000246513	0.000328463	0.000394515
FBti0020232	S{}1121	0.00039227	0.000607703	0.000334515	0.000294312	0.000255142	0.000510386	0.00031356	0.000372603	0.000255027	0.000569099	0.000294626	0.000215928	0.000352822	0.000254757	0.000215768	0.00043154	0.000552969	0.000236072	0.000176505	0.000195984	0.000255012
FBti0020231	S2{}1120	0	0.000115331	0.00017365	8.65755e-05	2.88665e-05	5.77446e-05	2.88242e-05	2.88436e-05	0	5.77266e-05	5.77785e-05	0.000115487	5.76593e-05	0	0.000115401	2.88506e-05	5.60905e-05	0.000115739	0	2.88255e-05	2.88518e-05
FBti0020230	1360{}1119	0.000356532	0.00015272	0.000178846	0.000764283	0.000688046	0.00101953	0.000458025	0.000305555	0.000509435	0.000356725	0.000357045	0.000254878	0.00040721	0.000381671	0.00045844	0.000738604	0.000618953	0.000664127	0.000483819	0.000407152	0.000967868
FBti0020227	17.6{}1116	0.0030879	0.0028521	0.00355131	0.00608602	0.00600816	0.00521788	0.00419327	0.00532146	0.00421429	0.00385568	0.00443738	0.00296484	0.00167679	0.00143811	0.001406	0.00372007	0.00335182	0.0041422	0.00574847	0.00634246	0.00637754
FBti0020225	1360{}1114	0.000228842	5.71809e-05	0.000258286	0.00028616	0.00014312	0.000114519	0.000314402	0.000200208	0.000429167	0.000314828	0.000401051	0.00034355	0.000200112	0.000400131	0.00014304	5.72163e-05	8.34287e-05	0.000172149	0.00011441	0.000114333	2.86094e-05
FBti0020223	transib3{}1112	0.000872889	0.000702205	0.000662138	0.000511151	0.00106519	0.0010441	0.000531816	0.000681181	0.000787889	0.000362125	0.000575657	0.000213077	0.000404256	0.000446707	0.000383255	0.000383258	0.000827909	0.000896875	0.000702503	0.00123387	0.001235
FBti0020222	Cr1a{}1111	6.80806e-05	0	0.000239058	6.81061e-05	0.00013625	0.000136277	0.00013605	0	6.80945e-05	0	0	0	0	0	0	6.80874e-05	9.92801e-05	6.82859e-05	0.000204223	0.000102042	0.000374497
FBti0019685	Stalker{}213	0.000380103	0.000721821	0.000800815	0	0.00015214	0.000266299	0.000265855	0.000152019	0.00019009	3.80308e-05	0	7.6084e-05	0	7.59555e-05	0	0.000152056	0.000295623	0.000152499	7.60134e-05	0	7.60314e-05
FBti0019697	mariner2{}225	0	0	0	0	0	0	0	0	0	0	0	0	0	0	0	0	0	0.000220277	0.000219594	0	0
FBti0019699	HB{}227	0.00769447	0.00745458	0.00826416	0.00864181	0.00852613	0.00626004	0.00747595	0.00705619	0.00502839	0.00500647	0.00553097	0.00396856	0.00599133	0.00556546	0.00616086	0.00521671	0.00642491	0.00532661	0.00448409	0.00400937	0.00542939
FBti0019700	Cr1a{}228	0	0.000151962	0	0	0	0	0	0	0	0	0	0	0	0	0	0	0	0.000152499	0	0	0
FBti0019711	G{}239	0.000327078	0.000980724	0.000656285	0	0.000327291	0.000436475	0.000762559	0	0	0.00021817	0	0	0.000217915	0.00043573	0	0	0	0	0	0	0
FBti0019714	looper1{}242	0	0	0	8.8834e-05	0	0	0	0	0	0	0	0	0	0	0	0	0	0	0	0	0
FBti0019713	G2{}241	0.000927312	0.00192361	0.00187822	0.000122521	0.000472712	0.00199629	0.000349644	0.00040236	0.0007	0.000227577	0.000630778	7.00442e-05	0.000437137	0.000332148	3.49961e-05	0.000139986	0.000425243	0.000421181	1.74948e-05	0.000139864	5.24968e-05
FBti0019712	invader3{}240	0.000705852	0.000648592	0.000730995	0.000706117	0.000410117	0.000729243	0.00452174	0.0046443	0.00419612	0.00439688	0.0051761	0.00521285	0.000955718	0.00109768	0.000865318	0.000483899	0.000509129	0.000793624	0.00319311	0.00333885	0.00299461
FBti0019710	invader2{}238	0.000191344	0.000396656	0.000248846	0.00012761	0.000333297	0.000659635	9.20534e-05	0.00013463	0.000170118	0.000205629	0.000347753	0.000198596	0.000276213	0.000226584	0.000141749	0.000311851	0.000165352	0.00015638	9.21198e-05	0.000162871	0.00022681
FBti0019709	1360{}237	0	0	0	0	0	0	0	0	0	0	0	0	0.000165052	0	0	0	0	0	0	0	8.25894e-05
FBti0019708	H{}236	0.000231147	0.000212545	0.000204072	8.78689e-05	0.000175787	0.000388659	9.23836e-05	0.000106313	5.54867e-05	0.000148014	0.000134258	0.000120297	8.7781e-05	9.23798e-05	6.47272e-05	0.000147949	0.000179774	0.000102011	8.78277e-05	0.000120104	0.000180321
FBti0019707	gypsy2{}235	0.000671463	0.00122933	0.000856227	0.000392356	0.000810049	0.00189991	0.000442052	0.000461172	0.000455056	0.000442651	0.000455618	0.000345432	0.00037315	0.000338579	0.000244761	0.000665254	0.000488063	0.000575926	0.000561591	0.000457749	0.000389128
FBti0019706	Helena{}234	0.000233865	0.00070123	0.000117313	0	0.000175513	0.000819224	0.000350511	0	0.000116956	0	0	0	0	0	0	0.000116944	0.00011368	0.000117285	0.000233843	0	0
FBti0019704	412{}232	0.000312988	0.000381892	0.000346632	0.000422896	0.000467755	0.000577691	0.00156367	0.00153627	0.00139044	0.00155765	0.00159162	0.00146454	0.000528091	0.000365517	0.000422776	0.000227651	0.000233151	0.000183467	0.000227606	0.000276193	0.000272379
FBti0019702	gtwin{}230	0.000586085	0.000319517	0.000481086	0.000106601	5.33153e-05	0.00111984	0	0	0	0.000266546	0.000213429	0	0	0	0	0.000106572	5.17983e-05	0	0.000106551	5.32395e-05	0
FBti0019701	jockey2{}229	0	0	0	0	0	0	0	0	0	0	0	0.000140651	0	0.000140413	0	0	0	0.000422871	0	0	0
FBti0019698	micropia{}226	0.00105888	0.00100745	0.000909108	0.000325931	0.000499221	0.000794838	0.000284851	0.000590445	0.00084524	0.000682532	0.000927854	0.000815203	0.000712262	0.000447605	0.000407299	0.000926613	0.0011779	0.00138887	0.00147619	0.0013938	0.00106922
FBti0019690	blood{}218	0.0013965	0.00154857	0.00170779	0.0010581	0.00120723	0.00124469	0.00227882	0.00210685	0.00192988	0.00327818	0.0028384	0.00298141	0.0032372	0.00417353	0.00235113	0.00141317	0.00206861	0.00121423	0.00103695	0.00127983	0.00117356
FBti0019687	G{}215	0.000272457	0.000695918	0.000880776	0.000121137	6.05855e-05	0.000151494	0.000120993	0.000151343	6.05583e-05	0	0.000121266	6.05965e-05	3.02541e-05	0.000151235	0	0	0.000294309	0.000334007	0.000121081	0	0
FBti0019683	GATE{}211	0.000256371	0.000256238	0.000771616	0.000256466	0.000256538	0.000513178	0	0	0	0	0	0	0	0	0.000384591	0	0	0.000514287	0.000640866	0.000256173	0
FBti0019680	rooA{}208	0.000778888	0.000589761	0.00118398	0.00141669	0.00151156	0.00250402	0.00101409	0.00174635	0.00120398	0.00196008	0.0016782	0.00151183	0.00125016	0.0014857	0.000896984	0.00143991	0.00137677	0.000946954	0.00172283	0.00158016	0.00160521
FBti0019522	flea{}3	0.018885	0.0133161	0.0175163	0.121665	0.127227	0.164616	0.0951209	0.0876685	0.0880888	0.0150308	0.0127382	0.019108	0.0148489	0.019021	0.0117585	0.02041	0.0233226	0.0179398	0.0210517	0.0250977	0.0182114
FBti0019523	3S18{}4	0.0530072	0.0488817	0.0544139	0.0827744	0.083603	0.0742063	0.0441958	0.0465603	0.045066	0.0607153	0.0538897	0.0566145	0.0456183	0.0445487	0.0403404	0.0669795	0.0661403	0.0647172	0.0697213	0.0650726	0.064982
FBti0019521	412{}2	0.000578577	0.000764297	0.000625112	0.000785217	0.000732803	0.0010569	0.00245796	0.00226139	0.00224194	0.0022184	0.00229738	0.00242962	0.000905736	0.000812549	0.000675743	0.00024683	0.000224206	0.000162328	0.000161825	0.000194058	0.000169956
FBti0019520	G3{}1	0.000664201	0.00041491	0.000333182	0.000249169	0.000913873	0.000914055	0.000580702	0.000747119	0.000664336	0.0008307	0.000415723	0.00124642	0.000912705	8.29541e-05	0.000166065	0.00182674	0.00226004	0.00158223	0.00199242	0.000414806	0.00132859
FBti0019524	412{}5	0.000297994	0.00031824	0.000368587	0.000559459	0.000543276	0.000522956	0.00134192	0.00153466	0.00127388	0.00148261	0.00164337	0.00139316	0.000530343	0.000346683	0.000355177	0.000151053	0.000182554	0.000126927	0.00023674	0.000126448	0.000179639
FBti0019525	297{}6	0.000335273	0.000241711	0.000187482	0.000214435	0.000291493	0.000374066	3.29508e-05	9.34234e-05	0.000115445	0.00014848	0.000176134	4.95078e-05	0.000219714	0.000170239	0.000208878	0.000214376	0.000149615	0.000126796	0.000109915	0.000120825	0.000164912
FBti0019526	roo{}7	0.000269365	0.00034049	0.000218578	0.000277391	0.000344853	0.000654163	0.000110824	0.000186152	0.000206027	0.000154572	0.000206281	0.000198228	0.000174186	0.000178103	0.000110925	0.000202044	0.000215659	0.000115222	0.000538679	0.000597688	0.000245632
FBti0019527	S{}8	0.000371028	0.000882941	0.000886276	0.00065396	0.000972373	0.000937201	0.00024715	0.000494632	0.000300417	0.00014142	0.000513109	0.000459751	0.000900503	0.000476627	0.000229705	0.000583102	0.00097906	0.000779735	0.000777318	0.000670867	0.000989548
FBti0019528	FB{}9	0.0003379	0.00123832	0.000452001	0.00101408	0.00214143	0.00281823	0.00146304	0.00078832	0.00101391	0.00135233	0.000902364	0.000450909	0.000562814	0.000675222	0	0.00157702	0.000766501	0.000338919	0.0010136	0.00067528	0.000675897
FBti0019529	Rt1c{}10	0.00202349	0.00180955	0.00270677	0.00305412	0.00333915	0.00387277	0.00234107	0.00234265	0.00319563	0.00220217	0.00142203	0.00195411	0.00145458	0.00166706	0.0012426	0.00195268	0.00189817	0.00167352	0.00376262	0.00315705	0.00376351
FBti0019531	412{}12	0.000489307	0.000703267	0.000576098	0.000679623	0.000659579	0.000760894	0.00218999	0.00205803	0.00196976	0.00219296	0.00215443	0.00257809	0.000929506	0.000808079	0.000598546	0.000202213	0.000176912	0.000158186	0.000210261	0.000242445	0.000258844
FBti0019532	roo{}13	0.0003051	0.000392569	0.000214617	0.000357838	0.000466722	0.000705488	0.00012965	0.000178826	0.00023501	0.000249124	0.000256372	0.000231648	0.000322433	0.000234761	0.000241998	0.000322667	0.000303432	0.000267328	0.000238447	0.000259311	0.000305144
FBti0019530	baggins{}11	0.00129449	0.00107818	0.000974029	0.00161872	0.00205095	0.00129559	0.00247908	0.00107859	0.00205003	0.000755527	0.000756206	0.00118761	0.00064684	0.000754473	0.000215768	0.0014025	0.00178285	0.00108199	0.00172582	0.00140129	0.0020499
FBti0019534	Doc{}15	0.00166741	0.00182866	0.00172492	0.00279737	0.00264883	0.00278572	0.00160771	0.00164771	0.00184296	0.00228501	0.00275487	0.00270125	0.00208782	0.00188639	0.00219314	0.00189468	0.00170303	0.00162038	0.00194621	0.00170503	0.00227112
FBti0019536	1360{}17	0.00407707	0.000931419	0.00327228	0.00104878	0.00151533	0.00104928	0.0016295	0.00104824	0.00267976	0.00244756	0.00268307	0.00256487	0.00279396	0.00174582	0.000349495	0.00209699	0.00362391	0.0042062	0.00267897	0.00349194	0.00314562
FBti0019539	roo{}20	0.000292671	0.000373214	0.000310499	0.000299511	0.000319792	0.000606043	0.000174787	0.00019845	0.000255719	0.000121171	0.000198764	0.000168342	0.000228611	0.000181502	0.000141302	0.000208591	0.000274718	0.000242941	0.000282552	0.000211771	0.000285984
FBti0019538	gtwin{}19	2.48034e-05	0.000107425	3.73262e-05	1.24063e-05	8.27318e-06	9.51606e-05	4.95663e-05	9.09326e-05	4.96168e-05	1.65445e-05	3.31187e-05	8.27468e-06	0	0	0	2.48058e-05	3.61701e-05	2.07318e-05	2.4801e-05	2.06536e-05	1.24035e-05
FBti0019537	I{}18	0.00209327	0.00306736	0.0033993	0.00456078	0.00317746	0.0030183	0.00202067	0.00244771	0.00207595	0.000940706	0.000870491	0.000869965	0.00290747	0.00166609	0.00338857	0.000585465	0.00093129	0.000551585	0.00085142	0.000496327	0.000904849
FBti0019541	Stalker2{}22	3.1091e-05	0.000104878	7.79806e-06	5.44296e-05	6.22225e-05	3.88969e-05	0.000380554	0.000365267	0.000427588	0.000540498	0.000583795	0.000525098	4.66073e-05	4.65965e-05	5.83009e-05	0.000221545	0.0003476	0.000409299	0.000345855	0.000198053	0.000299294
FBti0019540	opus{}21	0.000815337	0.000814914	0.000760732	0.00038743	0.00037122	0.000554902	0.000782085	0.000701089	0.000864433	0.00110538	0.0010533	0.000795616	0.000700751	0.000460271	0.000880644	0.000220163	0.000233833	0.000286228	0.00081526	0.000778048	0.000778758
FBti0019543	Tirant{}24	9.70071e-05	0.000129276	0.00016581	0.000158145	0.000100666	0.000377571	0.000186676	0.00016884	0.000122182	4.31376e-05	8.27546e-05	3.23627e-05	0.000190302	0.000122053	0.000104202	0.000273084	0.000586809	0.000381991	0.000319734	0.000197455	0.000280283
FBti0019542	FB{}ph-p[FB]	0.000466112	0.00101644	0.00102028	0.000953768	0.000996435	0.00307472	0.000486902	0.000487229	0.00033906	0.000275579	0.000381913	0.00023325	0.000381126	0.0003387	0.000317833	0.0032843	0.00354278	0.00348513	0.00330485	0.00309091	0.00372943
FBti0019544	roo{}25	0.000251147	0.000358068	0.000251965	0.000291883	0.000406533	0.000458365	0.000262014	0.000151405	0.000210563	0.000188462	0.000225618	0.000173732	0.000188243	0.000180819	0.000158828	0.000254866	0.000226208	0.000196337	0.000313904	0.000254645	0.000265959
FBti0019545	HMS-Beagle{}26	0.00124975	0.00154837	0.00148456	0.000681543	0.000825027	0.00117264	0.00078913	0.000924163	0.000815976	0.00333447	0.00303327	0.00329636	0.0032135	0.00357262	0.00417056	0.000798532	0.000738273	0.000757335	0.0011455	0.000858544	0.00141485
FBti0019548	mdg1{}29	0.00174993	0.00204469	0.00178907	0.00190897	0.00193869	0.00191822	0.00203576	0.00182883	0.00184613	0.000591963	0.000613357	0.000479547	0.00169887	0.00161522	0.00144174	0.00239598	0.00175391	0.00170088	0.000974869	0.00134474	0.000975101
FBti0019547	roo{}28	0.000303115	0.000349844	0.000307722	0.000397085	0.000451359	0.000599524	0.000227151	0.000281424	0.000259866	0.000194965	0.00019514	0.00021308	0.000227194	0.000259591	0.000129918	0.00028871	0.000210488	0.000285932	0.000202058	0.000288459	0.000234587
FBti0019546	1360{}27	2.82102e-05	0	0.000339625	0.000338649	8.46858e-05	0.000254108	0.000112749	0.000648741	0.000479671	0.000592734	0.000395511	0.000338805	0.000338311	0.000422791	0.000282128	0	0.000137127	0.000141476	0	5.6377e-05	5.64285e-05
FBti0019551	Transpac{}32	0.00128405	0.00133589	0.00128238	0.00221874	0.00219015	0.00298504	0.00400064	0.00350145	0.00419153	0.00220158	0.00283482	0.00211461	0.00069412	0.00098554	0.000898918	0.0025275	0.00224132	0.00207238	0.00242196	0.00379087	0.00316389
FBti0019552	opus{}33	0.000857719	0.000821051	0.000852432	0.000346439	0.0003828	0.000544088	0.000716195	0.000692519	0.000773312	0.0011523	0.00104446	0.000850374	0.000591577	0.000394293	0.000773226	0.000306071	0.00022706	0.000311002	0.000644235	0.000651848	0.000757156
FBti0019553	roo{}34	0.000269597	0.000353662	0.000385426	0.000380948	0.000431636	0.000694803	0.000212134	0.000114562	0.000188756	0.000262999	0.000229487	0.000202366	0.000259324	0.000249163	0.000158402	0.000262883	0.000176915	0.000114924	0.000360551	0.000198675	0.000239301
FBti0019550	FB{}31	0.000778127	0.000937257	0.000950805	0.000389209	0.00067881	0.00202685	0.000388747	0.000289262	0.000299341	0.000329386	0.000249759	0.000269577	0.000209365	0.000328926	0.000109746	0.000838067	0.000775878	0.000800486	0.000588528	0.000528321	0.000688442
FBti0019549	pogo{}30	0.00197653	0.00312789	0.00280921	0.000494318	0.000329637	0.00131881	0.0021395	0.00197625	0.000823723	0.000659201	0.00131959	0.000659394	0.00115226	0.000822851	0.00197671	0.000329455	0.00160129	0.000826039	0.000164696	0.000329169	0.000988408
FBti0019556	roo{}37	0.00024237	0.000302806	0.000324213	0.000289606	0.00032674	0.000667086	0.000198447	0.000195215	0.000188549	0.000185244	0.000370821	0.000222358	0.000191756	0.000104265	0.000198627	0.000269327	0.000183266	0.000236348	0.000292836	0.000248911	0.000161603
FBti0019555	hopper{}36	0.000660068	0.000909967	0.00125593	0.000387081	0.000911033	0.00189077	0.000318394	0.000546185	0.000591906	0.00166245	0.00118527	0.000774519	0.000272961	0.00045483	0.000569077	0.00138856	0.00090724	0.00239711	0.00184347	0.00191045	0.0015252
FBti0019554	3S18{}35	0.0568324	0.0536444	0.0588886	0.0827944	0.0851741	0.0754624	0.0470386	0.0500849	0.0474616	0.0623162	0.0564284	0.0577956	0.0510552	0.049045	0.0435458	0.0692048	0.0679	0.0660714	0.0700213	0.0657921	0.0660572
FBti0019557	roo{}38	0	0.000124473	0.000249886	0	0	0.000249288	0	0.00024904	0	0	0	0	0	0.000124431	0.000249098	0	0	0	0	0	0.000249111
FBti0019558	roo{}39	0.000683119	0.00061774	0.000620073	0.000611783	0.000579403	0.000820442	0.000260024	0.000266704	0.000292825	0.000182264	0.000410461	0.000279987	0.000507143	0.000422521	0.000344844	0.000533537	0.00036052	0.000313225	0.000520423	0.000299041	0.000448971
FBti0019560	roo{}41	0.000245746	8.18727e-05	4.1091e-05	0.000327783	0.000122953	0.000778858	4.09242e-05	0.000163807	0.00020483	0.000286858	0.000164066	0.000245951	4.0932e-05	0.000245535	0	0.00024577	0.000318546	0.000164324	0.000368584	0.000368335	0.000327708
FBti0019562	FB{}43	0.000270161	0.000432034	0.000650498	0.000324315	0.000540675	0.00108157	0.000107976	0.000162073	5.40432e-05	5.40614e-05	0.00037877	5.40773e-05	0.000431987	0.000323916	0.000270186	5.40376e-05	0.000262646	0.000216781	0.000108054	0.000377935	0.00021616
FBti0019563	17.6{}44	0.00185092	0.00200923	0.0021316	0.00377681	0.00405588	0.00340239	0.00217602	0.00237767	0.00193304	0.00154531	0.00216457	0.00135357	0.00103718	0.000849145	0.00100523	0.00228426	0.00185107	0.00238108	0.00323166	0.00330706	0.00327738
FBti0019566	412{}47	0.000416517	0.000501178	0.000442216	0.000364084	0.000303487	0.000485677	0.00210109	0.00215911	0.00194145	0.00216463	0.00249055	0.00273593	0.000606199	0.000565656	0.000444865	8.89738e-05	0.000149392	0.00015413	0.000165783	0.000165671	0.0002548
FBti0019565	pogo{}46	0.00230596	0.00164626	0.00247871	0.0018125	0.000988912	0.00148366	0.00148119	0.00214094	0.0014827	0.001648	0.00115464	0.00296727	0.00181069	0.00296226	0.00197671	0.000494183	0.00160129	0.000660831	0.000494087	0.000822922	0.000658939
FBti0019564	mdg1{}45	0	0	0	0.000162157	0.000162202	0	0	0.000162073	0	0.000162184	0	0	0	0.000647832	0	0	0	0	0	0	0
FBti0019567	297{}48	0.000232692	0.00018869	0.000233449	0.00019325	0.00021527	0.00033835	4.82551e-05	7.46262e-05	0.000122956	0.000166926	0.000101125	0.000105458	0.000193057	0.0001316	0.000171242	0.000184416	0.000119512	0.000127706	0.00013609	0.000210578	0.000193206
FBti0019568	copia{}49	0.0204778	0.0175926	0.0198037	0.466418	0.442952	0.412896	0.482564	0.477232	0.436577	0.0425744	0.0464946	0.0553999	0.0314978	0.0282422	0.0277211	0.0320388	0.038178	0.0317679	0.0672803	0.0531751	0.0575711
FBti0019569	jockey{}50	0	0	0	0.000229571	0	0	0	0.000229452	0.000229532	0	0.000574539	0.000229677	0	0.000114644	0	0.000229508	0	0	0	0.000114654	0
FBti0019571	Stalker4{}52	0.000213246	0.00014209	0.000142627	0.000426651	0	0.000213427	0.000142048	0.000142143	0.000213289	0.000213361	7.11841e-05	0	0.000284149	0	0	7.1089e-05	0.000138209	7.12962e-05	0.000426451	0.000142054	0.000142184
FBti0019576	roo{}57	5.18819e-05	0.000285203	0.000260254	0.000220581	0.000395858	0.000571188	0.000220318	0.000142655	0.000259462	9.73312e-05	0.00029875	0.000142794	0.000136105	0.000103675	0.000220518	0.00022052	0.000189145	0.00014961	0.000252901	0.000207368	0.000194585
FBti0019574	Stalker4{}55	0.000226191	0.000464706	0.000365605	0.000268178	0.000402379	0.000876188	0.000184153	0.000247099	0.000314218	0.000234695	0.000348164	0.000264109	0.000238607	0.000230182	0.000154997	0.000469183	0.000472375	0.000403329	0.000439774	0.000410179	0.00061164
FBti0019573	jockey{}54	0.000350129	0.000349947	0.000175634	0	0.000613125	0.000175214	0.000262383	0.000175039	0.0001751	0.000262739	0.000350633	0.00017521	0.000174955	0.000349829	8.75402e-05	0	0.000170194	8.77961e-05	0.000262572	0.00034986	0.000350179
FBti0019572	roo{}53	7.69756e-05	0	0.00012871	0	0	0.000102722	0.000153826	2.56548e-05	5.13275e-05	0	0	0	0	2.56366e-05	0	2.56611e-05	2.49448e-05	0	0	0	0
FBti0019570	jockey{}51	0.000610528	0.000512577	0.000698268	0.000910027	0.00109967	0.00126487	0.000372118	0.000384577	0.000494628	0.0011423	0.00147349	0.000965438	0.00111046	0.000921108	0.00133107	0.00139214	0.00147792	0.00172688	0.00132472	0.00134823	0.00161813
FBti0019578	springer{}59	0.000832197	0.000811379	0.000851278	0.00092637	0.000796002	0.00112687	0.0110828	0.0112004	0.0112288	0.0145387	0.0153974	0.0150084	0.00361616	0.00301209	0.00324342	0.00618091	0.00664291	0.00595342	0.00644892	0.00633858	0.00708693
FBti0019581	I{}62	0.00240393	0.00342677	0.00357414	0.00494369	0.00421159	0.00358135	0.0018822	0.00282125	0.00280647	0.00111192	0.000773521	0.000733612	0.00299318	0.00241762	0.00379146	0.000756721	0.000704948	0.000664061	0.000748693	0.000850572	0.000867114
FBti0019582	412{}63	0.000394424	0.000289631	0.000484541	0.000555621	0.000620214	0.000676732	0.00127882	0.00104628	0.00123987	0.00135304	0.00121722	0.00136149	0.000458533	0.000458427	0.000434711	0.000201257	8.6081e-05	0.000290655	0.000241461	0.000273471	0.000233468
FBti0019580	297{}61	0.00035191	0.000180888	0.000353056	0.000251458	0.000140856	0.00051322	6.02783e-05	0.000130691	0.000281585	0.00021126	0.000261795	0.0002717	0.000150724	0.000231057	0.000211165	0.000100556	0.000146623	0.000191613	6.03217e-05	0.00022103	0.000160896
FBti0019579	jockey{}60	0.000652947	0.000757026	0.000602667	0.000679319	0.00117607	0.00101947	0.000626318	0.00101845	0.000679203	0.00078396	0.000836975	0.000888749	0.000756945	0.000730675	0.00127989	0.000783615	0.000685566	0.00107406	0.000600655	0.0011483	0.00080977
FBti0019583	Doc{}64	0.00174564	0.00148529	0.0016146	0.00266813	0.00277277	0.00315652	0.00168586	0.00173241	0.00163565	0.00207122	0.00255399	0.00255245	0.0020299	0.00166634	0.00225201	0.00187561	0.00204406	0.00179646	0.00169356	0.00170539	0.00184324
FBti0019584	pogo{}65	0.00164711	0.00362177	0.00231347	0.000659091	0.00197782	0.000494555	0.000987462	0.000988125	0.00115321	0.0021424	0.00181443	0.00131879	0.00296295	0.00246855	0.00164726	0.001812	0.00128103	0.000165208	0.00181165	0.000329169	0.000329469
FBti0019585	pogo{}66	0.00197653	0.000987754	0.00214822	0.00214205	0.00131855	0.00164852	0.00197492	0.00148219	0.00181219	0.0013184	0.00247422	0.00280243	0.00164608	0.00131656	0.00197671	0.00115309	0.000640517	0.000330416	0.000164696	0.000329169	0.000494204
FBti0019587	Quasimodo{}68	0.00104668	0.00128277	0.00116677	0.00162463	0.00160846	0.0023612	0.00177625	0.00144937	0.00159943	0.000585961	0.00056985	0.00049468	0.000518864	0.000626643	0.000502621	0.00102187	0.00115082	0.00104151	0.00128331	0.00129905	0.00108422
FBti0019586	copia{}67	0.0208627	0.0182223	0.0207156	0.468302	0.457986	0.419384	0.496781	0.48773	0.447552	0.0463098	0.0484436	0.0556047	0.0324493	0.0280944	0.0279603	0.0352171	0.0400496	0.0342749	0.0723488	0.0551112	0.0611265
FBti0019588	Tirant{}69	0.000174779	0.000187166	0.000162823	9.99111e-05	0.000249847	0.000337361	0.000149689	0.000124824	0.000199788	3.74729e-05	0.000125022	9.99571e-05	0.000361816	0.000249471	0.000224737	0.000849012	0.00137147	0.00105184	0.000773949	0.000623731	0.000736674
FBti0019589	Doc{}70	0.00194371	0.00187099	0.00191732	0.00285141	0.00264987	0.00278749	0.0019682	0.00173474	0.00162444	0.00241464	0.00282832	0.00257854	0.00220975	0.00174654	0.00228309	0.00161775	0.0022384	0.00163555	0.00173483	0.00154465	0.00197661
FBti0019591	297{}72	0.000225701	0.000198729	0.000237219	8.06378e-05	0.000236603	0.000354976	4.83252e-05	0.000123581	0.000128998	0.000150549	0.000145303	0.000145215	0.000209449	0.0001396	0.000177353	0.000198852	0.000172404	0.000107801	0.000204187	0.000118134	0.000112867
FBti0019590	Rt1b{}71	0.000551097	0.00108386	0.000856091	0.000409032	0.000782713	0.00200462	0.000532885	0.000651742	0.000557136	0.000675904	0.000623102	0.00049225	0.000432311	0.000307877	0.000171863	0.00109638	0.00106577	0.00108769	0.000912484	0.000834892	0.000817875
FBti0019594	transib4{}75	0.000289021	0.000722179	0.000579925	0.00101195	0.00137375	0.00115707	0.000144393	0	0.00036135	0.000216883	0.000217078	0.000289263	0.000433261	0.000505355	0.000216786	0	0.000280981	0	0	0	0.000216797
FBti0019595	1360{}76	0.00102471	0.000420177	0.00105441	0.0010251	0.00123572	0.00123596	0.00115514	0.00131355	0.00155052	0.00131444	0.001263	0.000710008	0.00120788	0.00139137	0.000919698	0.00136642	0.00199241	0.00155488	0.00197042	0.00249417	0.002076
FBti0019593	Burdock{}74	0.000413306	0.000526691	0.000653076	0.000485816	0.000444593	0.000527414	0.000381996	0.000392584	0.000320377	0.00103382	0.00103475	0.00107549	0.0019723	0.00150727	0.00205638	2.06673e-05	0.000271221	0.000114002	0.000144643	0.000123896	0.000155012
FBti0019592	Tirant{}73	0.000163616	0.0001708	0.000138615	8.00202e-05	0.000189191	0.000385736	0.000123521	0.000207218	0.000123646	7.63956e-05	6.55408e-05	5.82233e-05	0.000203484	0.000159844	0.000163631	0.000418173	0.000604447	0.000539739	0.000399914	0.000217988	0.000374554
FBti0019596	Tabor{}77	0.000409431	0.000501084	0.000528125	0.00051407	0.000647992	0.000735931	0.000275514	0.000317472	0.00032594	0.000250807	0.000297055	0.000292694	0.000438401	0.000500914	0.000442894	0.00080223	0.000905747	0.000720759	0.00097335	0.000885026	0.00109894
FBti0019597	roo{}78	0.000306329	0.000326357	0.000273554	0.000363691	0.000380635	0.000599704	0.000178266	0.000124534	0.000276089	0.000178508	0.000239348	0.000262787	0.000201849	0.000131172	0.000168328	0.000218828	0.000232355	0.000202584	0.000279373	0.000262366	0.00017507
FBti0019598	jockey{}79	0.000427582	0.000747881	0.000407526	0.0011549	0.00132637	0.00139083	0.000234979	0.000256513	0.00049182	0.00271662	0.00336135	0.00303837	0.00457227	0.00299051	0.00320716	0.00222365	0.0022655	0.00238024	0.0022446	0.00207218	0.00301489
FBti0019599	jockey{}80	0.000485007	0.000242378	8.10977e-05	8.08648e-05	0.000323549	8.09034e-05	0	0.000161646	0	0	0	0	0.00040392	0.000161531	0.000242526	0	0	0	0.000242481	0.000161545	0
FBti0019600	jockey{}81	0.000262972	0	0	0	0.000263144	0.000131598	0	0	0	0	0.000263351	0.000394788	0.000131404	0.000131374	0	0	0.000127828	0.000131883	0.000394421	0.00052554	0.000657525
FBti0019602	Juan{}83	0.000260426	0.000216909	0.000312078	0.000144735	0.000499476	0.000347531	0.00031804	0.000209758	0.000311128	0.00547915	0.00499869	0.00504635	0.00568242	0.00531249	0.00454341	0.000571548	0.000654053	0.000558703	0.000694405	0.000766221	0.000824802
FBti0019601	hopper{}82	0.000320687	0.00032052	0.000622013	2.13871e-05	0.000192538	0.000213973	6.40851e-05	6.41281e-05	8.55339e-05	0	0.000128459	6.41909e-05	8.5463e-05	0	4.27622e-05	0.000256575	0.000353335	0.000150105	0.000406165	0.000363166	0.000534554
FBti0019603	H{}84	0.00914669	0.0101486	0.00992915	0.0120391	0.0162691	0.0162621	0.00703413	0.00736768	0.00659929	0.00406168	0.00543416	0.00248915	0.0117703	0.00950852	0.00755442	0.0032068	0.00518548	0.00446344	0.00387413	0.00270082	0.00382366
FBti0019604	BS{}85	9.25567e-05	0	0.000185716	0	0.000185234	0.000277907	0.000277444	0.000370174	0	0	0	0.000370536	0	0	0	0	0	0	0	0	0
FBti0019605	HB{}86	0	0	0	0	0	0	0	0	0.000101465	0	0	0	0	0	0	0	0	0	0	0	0
FBti0019606	jockey{}87	0.000510605	0.000170113	0.000341512	0.00034053	0.000510938	0.00051104	0.000680251	0.00102106	8.51181e-05	0.00025544	0.000170446	0.000170344	0.00034019	0.000340112	0.000510651	0.000340437	0.000330934	0	0.000340371	0.000255106	0.000595791
FBti0019608	roo{}89	0.000230224	0.000336939	0.000251597	0.000357804	0.000468977	0.000637771	0.000217713	0.000127427	0.000263167	0.000189215	0.000255258	0.000263333	0.000152017	0.000160198	0.000168573	0.00023847	0.00021183	0.000222671	0.000287753	0.000279343	0.000250816
FBti0019609	jockey{}90	0.000617409	0.00100011	0.00134564	0.00136307	0.00100128	0.00187511	0.000957268	0.000915338	0.000979538	0.00127809	0.00164169	0.00119323	0.00189362	0.00136139	0.0015756	0.00127753	0.00155233	0.0012599	0.00129857	0.00165934	0.00127758
FBti0019610	mdg3{}CG42395[iso-1]	0.000344228	0.000229366	0.000690697	0.000688713	0.00229635	0.00149293	0.00149044	0.00103254	0.00126243	0.00206648	0.00206834	0.00195225	0.00114671	0.000802511	0.0019508	0.00332787	0.00334652	0.00172633	0.00263883	0.00149051	0.00172139
FBti0019611	297{}92	0.000284683	0.000302045	0.000281216	0.000140204	0.000140243	0.000337527	0.000131285	6.56867e-05	0.0001358	0.000140227	0.000100879	0.000170952	0.000223227	0.000201296	0.000179586	0.000188348	8.51581e-05	0.000162539	9.63452e-05	0.000153173	0.00011389
FBti0019612	297{}93	0.000276378	0.000255387	0.000230193	0.000135633	0.000286995	0.000344463	0.00012505	0.000104279	0.000192983	0.000120003	7.31107e-05	0.000135695	0.000234514	0.000171937	0.000203391	0.000224254	0.000278829	0.000188295	0.000286781	0.000286587	0.000192971
FBti0019614	412{}95	0.000325261	0.000506156	0.000499807	0.000457183	0.00046555	0.000597507	0.00198289	0.00166724	0.00159781	0.00196498	0.00218115	0.00208917	0.000567822	0.000493644	0.000436466	0.000275882	0.000328221	0.000433612	0.000382866	0.000382608	0.000337661
FBti0019613	1360{}94	0.0244238	0.0246546	0.0249616	0.0209904	0.0201734	0.0163065	0.0141189	0.0121797	0.0102649	0.00377828	0.00442212	0.00466328	0.0129042	0.00998022	0.0121521	0.0270455	0.0260536	0.0275519	0.0185445	0.0153368	0.0211073
FBti0019616	springer{}97	0.000913785	0.000860307	0.000761239	0.000706	0.000922546	0.00124936	0.0103655	0.0109475	0.0103148	0.0138407	0.015283	0.0141102	0.00347755	0.00335855	0.00281504	0.00588716	0.00614717	0.00549515	0.00609404	0.0061307	0.00623829
FBti0019617	297{}98	0.000267126	0.000275741	0.000237242	0.000249703	0.000254154	0.000214759	8.31353e-05	9.19482e-05	0.00013578	0.000140207	0.000140333	0.000236669	0.00019256	0.000183765	0.000210217	0.000240875	0.000140491	0.000144946	0.000170769	0.000126897	0.000157671
FBti0019618	H{}99	0.00169959	0.0019165	0.00166141	0.00156944	0.00178792	0.00283507	0.00230782	0.00204794	0.00213582	0.000632242	0.0013529	0.00152655	0.0021776	0.00200293	0.00124212	0.000174335	0.000127101	8.74215e-05	0.000326814	0.000174183	0
FBti0019615	roo{}96	0.000333589	0.000309841	0.000327914	0.000306747	0.000418101	0.000539593	0.000185176	0.000185301	0.000181995	0.000182056	0.000242959	0.000101172	0.000239091	0.000121201	0.000144905	0.000198825	0.000199827	0.000179127	0.000272911	0.000191919	0.000219054
FBti0019619	roo{}100	0.000205086	0.000343643	0.000223909	0.000410326	0.000404404	0.000507116	0.000126568	0.000192995	0.000235294	0.000181056	0.000157056	0.000193183	0.000180845	0.000253125	0.000223203	0.000247335	0.000175925	0.000254106	0.000211098	0.000301366	0.00019305
FBti0019280	F{}864	0.000579193	0.000842949	0.000611662	0.000416769	0.000630411	0.00148481	0.000233519	0.000457192	0.000437024	0.000457505	0.000386685	0.000244074	0.000274183	0.000345188	0.000203244	0.000447141	0.000553203	0.000438253	0.000579139	0.000507674	0.000264231
FBti0019044	opus{}865	0.000320612	0.000522208	0.000476528	0.000249458	0.000213881	0.000618002	0.000569513	0.000391803	0.000641355	0.000570285	0.00066593	0.000546684	0.000415348	0.000201694	0.000510651	0.000106881	0.000334782	0.000309669	0.000332455	0.000379693	0.000593811
FBti0019028	roo{}866	0.000329857	0.000275859	0.000243133	0.00032998	0.000390697	0.000737757	0.000228694	0.000228847	0.000239026	0.000188591	0.00027977	0.000242546	0.000238828	0.000195054	0.000158211	0.000171677	0.000255236	0.000199186	0.000245686	0.000225341	0.000198616
FBti0019029	roo{}867	0.0003579	0.000429258	0.000861758	0.000716069	0.000286507	0.00107462	0.000143043	0.00014314	0.000143189	0.000286475	0.000215049	0	7.15353e-05	0.000429113	0.00021476	0	0.000208767	0.000717959	0.000143147	0.00014305	0.000644313
FBti0019030	roo{}868	0.000250871	0.00029565	0.000251688	0.000258457	0.000273516	0.000479685	0.000145911	0.000164728	0.000198491	0.000149855	0.000179987	0.000164889	0.000101034	0.000198281	0.000116085	0.000194726	0.00018929	0.000169004	0.000307008	0.000261903	0.000194734
FBti0018995	jockey{}870	0.00033946	0.000339284	0.000170283	0.000169794	8.49204e-05	0.000509624	0.000339183	0.00101823	0.000509294	0.000339644	0.000679897	0.000424679	0.0014418	0.000254377	0.000169746	0.000169747	0.00057753	0	0.000509142	8.47998e-05	0.000339509
FBti0018879	BS{}871	0	0.000447013	0	0	0	0	0	0	0	0	0	0	0	0	0	0	0	0	0	0	0
FBti0018973	diver{}873	0.000205512	0.000320632	0.000442535	0.000335962	0.00043637	0.000717396	0.000455764	0.00054127	0.000431161	0.0003962	0.000517028	0.000476583	0.000310579	0.000345565	0.00029075	0.0010026	0.00100872	0.000859718	0.0010024	0.000806389	0.000967547
FBti0018996	jockey{}872	0.00056294	0.000712102	0.000608896	0.00105591	0.00122343	0.00121488	0.000615214	0.000316609	0.000554257	0.00140811	0.0020436	0.00157579	0.0013801	0.00116886	0.00182972	0.00190891	0.00220622	0.0019233	0.00218119	0.00190725	0.0022169
FBti0018994	jockey{}869	0.000607366	0.000839159	0.000806485	0.000929261	0.000768641	0.00100122	0.000553324	0.000660863	0.000446684	0.00105453	0.00182472	0.0012515	0.00124968	0.00146357	0.001858	0.0015007	0.00166721	0.00136174	0.00139324	0.0011067	0.0015365
FBti0018997	jockey{}874	0.000263349	0.000175475	0.000528413	0.000175632	0.000351361	0.000175716	0.000175423	0.000351082	0	8.78305e-05	0	8.78563e-05	0.000350912	0	0.000351164	0	0	8.80477e-05	0.000175549	0	0.000263387
FBti0018962	flea{}875	0.0165323	0.0116052	0.0152793	0.0940025	0.100852	0.135333	0.0790913	0.0737899	0.0718531	0.0177159	0.0142209	0.0208436	0.0144648	0.0188481	0.0123039	0.0192039	0.0226703	0.0185017	0.0179619	0.0253097	0.0178697
FBti0018963	flea{}876	0.0237829	0.0154655	0.0205844	0.127095	0.126886	0.172841	0.102894	0.0971461	0.0966863	0.0199313	0.015996	0.0235283	0.0168945	0.0204635	0.0125444	0.0204222	0.022298	0.0178543	0.0200588	0.0251403	0.0183454
FBti0018964	flea{}877	0.0211689	0.0132877	0.0179431	0.116338	0.118368	0.15702	0.0912362	0.0867812	0.0874584	0.0159341	0.0130693	0.0217975	0.014116	0.0187051	0.010909	0.0223431	0.0247755	0.0207245	0.0221495	0.0283864	0.0195236
FBti0018868	297{}879	0.000740007	0.000369811	0.000148483	0.000148057	0	0.000518446	0	0.00014798	0.000296063	0.000222122	0.000148214	0.000444374	0.000443726	0.000295749	0.000370037	7.40081e-05	0	0.000445343	0	7.39438e-05	7.40113e-05
FBti0018871	412{}880	0.0004575	0.000655544	0.000597092	0.000522474	0.000591491	0.00074559	0.00204696	0.00208881	0.00177368	0.00202948	0.00220159	0.00210706	0.00078495	0.000869719	0.00059116	0.000113374	0.000141698	0.000158374	0.000222656	0.000149686	0.000255103
FBti0019031	roo{}883	0.000398449	0.000291307	0.000318316	0.000321093	0.000383942	0.000675725	0.000173258	0.000180752	0.000199265	0.000169801	0.000273404	0.000269546	0.000184352	0.00020274	0.000143897	0.000295177	0.000225963	0.000277535	0.000335698	0.000224877	0.00027305
FBti0018873	412{}882	0.000482558	0.000614222	0.000359994	0.00059414	0.000606687	0.000664599	0.00172261	0.00160417	0.00147685	0.00180748	0.00174715	0.00163464	0.000783152	0.000395606	0.000445479	0.000181493	0.000160388	0.00013238	0.000251567	0.000173093	0.000264001
FBti0018872	412{}881	0.000472518	0.000284992	0.000441363	0.000994289	0.00103533	0.000966226	0.00181527	0.00133182	0.00156452	0.00168324	0.00177449	0.00188757	0.000561782	0.000358155	0.00040738	0.00015888	0.000174245	0.0001716	0.000114045	0.000175023	0.000281107
FBti0018874	412{}884	0.000306363	0.000485844	0.000422108	0.000392291	0.000421013	0.000551923	0.00162444	0.00180932	0.00145041	0.00195361	0.00178355	0.00178247	0.000620507	0.000502005	0.000400351	0.0002492	0.000146935	0.000213052	0.000281827	0.000163268	0.000265552
FBti0019002	mdg1{}885	0.00128696	0.00108904	0.0011839	0.00138205	0.00127546	0.00136625	0.00158993	0.00150467	0.00166558	0.000736392	0.000823523	0.000724263	0.00128205	0.00151181	0.00128708	0.00267287	0.00193071	0.001695	0.00129506	0.00156946	0.00144341
FBti0018918	G2{}CG3894[iso-1]	0.000495164	0.000894026	0.000448701	0.000127832	0.000671305	0.000975186	0.00046284	0.000463151	0.000415383	0.000319633	0.000207948	3.19727e-05	0.000287335	7.97968e-05	9.5847e-05	0.00041534	0.000372689	0.000592784	0.00020763	0.000510744	9.58519e-05
FBti0019998	HB{}887	0	5.97471e-05	0	0.000448504	8.97257e-05	8.97436e-05	2.98647e-05	0.000179309	8.96854e-05	5.98104e-05	5.98641e-05	0	0.000119481	5.97269e-05	0	5.97841e-05	5.81152e-05	0.000179875	0	5.97321e-05	0
FBti0020003	HB{}892	0	8.92723e-05	0.000179219	0.00044676	0.000178754	0.000178789	0.000356983	0.000714446	0.000357347	0.000178734	8.94471e-05	0	8.92627e-05	0	0.000178654	8.93275e-05	0.000260502	0.000179176	0	0.0001785	0.000357325
FBti0020006	pogo{}895	0.000961557	0.000480529	0.000723516	0.00173679	0.00147	0.00173762	0.00245531	0.00269731	0.00240438	0.00561211	0.0049217	0.00467813	0.00288287	0.00368281	0.00288494	0.00766651	0.00825747	0.00693873	0.00526136	0.00544463	0.00440777
FBti0020007	roo{}896	0.000376689	0.000457171	0.000263191	0.000370101	0.000387032	0.000727091	0.000161307	0.000295928	0.000178291	0.000181716	0.000276187	0.000306315	0.0002252	0.000181463	0.000282543	0.000248909	0.000212533	0.000259755	0.000356476	0.000302464	0.000174916
FBti0020008	297{}897	0.00029778	0.000218842	0.000197702	0.00017523	0.000236626	0.000359393	7.87598e-05	7.88127e-05	0.00015768	0.000179641	0.000127177	0.00020599	0.000157549	0.00023627	0.000135765	0.000170802	0.000161777	0.000149339	0.000183905	0.000179406	0.000183949
FBti0020009	roo{}898	0.000572641	0.00071543	0.000574505	0.000716069	0.000429761	0.000573129	0.000143043	0.000429419	0.000357973	0.000286475	0.000573465	0.000286559	0.000214606	0.00057215	0.00100221	0.000286349	0.000765478	0.000215388	0.000357867	0	0.000214771
FBti0020010	Tirant{}899	0.000123636	0.000152648	0.000109446	0.000112769	0.000149188	0.000283877	0.000181669	0.000163612	9.45644e-05	5.09365e-05	7.64733e-05	3.63939e-05	0.000170802	0.000130797	0.000109101	0.000312758	0.000671687	0.00048874	0.000363601	0.000174411	0.000374598
FBti0020011	mdg1{}900	0.00130544	0.00132138	0.00123044	0.00143902	0.00153926	0.00133984	0.00154947	0.00157545	0.00143461	0.000769544	0.000774399	0.000520115	0.00122568	0.00108417	0.00120161	0.00262777	0.00185519	0.00146367	0.00112656	0.00127536	0.000910613
FBti0020014	roo{}903	0.000252691	0.000373789	0.000300837	0.000370752	0.000407941	0.000590115	0.000164957	0.000222336	0.000188714	0.00019552	0.000327284	0.000175345	0.000178457	0.000215445	0.00014489	0.000192064	0.000242386	0.000246694	0.000282987	0.000222197	0.000262836
FBti0020015	412{}904	0.000484304	0.000580864	0.000611401	0.000484485	0.000525005	0.000662447	0.00207678	0.00194097	0.00177614	0.00189384	0.0019198	0.00194691	0.000738102	0.000846807	0.000548928	0.000129161	8.63192e-05	0.000234786	0.000225987	0.000177442	0.000197786
FBti0020013	412{}902	0.000547505	0.000643084	0.000649522	0.000483743	0.00051587	0.000771959	0.00196063	0.00195795	0.00167882	0.00208724	0.00171291	0.00218785	0.000710911	0.000706754	0.000551551	0.000139887	0.000143753	0.000236498	0.000207792	0.000235605	0.000227826
FBti0020012	jockey{}901	0.000992977	0.000525421	0.000673907	0.000934917	0.000789056	0.000818443	0.000700354	0.000613222	0.000701068	0.000964293	0.00128688	0.00111072	0.00122585	0.00154655	0.000993068	0.00119753	0.00178875	0.00155254	0.00137252	0.000787935	0.00113917
FBti0020016	Rt1a{}905	0.000330374	0.000660405	0.000467581	0.00013574	0.000135778	0.000549124	0.000389052	0.000230049	0.000348143	0.000342358	0.000407654	0.000366076	0.000271209	0.000353669	0.000236003	0.000241905	0.000355596	0.000189354	0.000224161	0.00015327	8.26053e-05
FBti0020017	1360{}906	5.53501e-05	0.000165964	8.32955e-05	2.76854e-05	0.000138466	0.000221589	2.76525e-05	8.30132e-05	2.76807e-05	5.538e-05	5.54297e-05	0.000193887	2.76577e-05	5.53027e-05	0	5.53556e-05	5.38104e-05	0.000111034	8.30173e-05	5.53075e-05	0.000193753
FBti0020018	1360{}907	0.00659089	0.00645118	0.00697717	0.0101856	0.00864198	0.00682397	0.00649468	0.00768069	0.00572842	0.00905032	0.00696453	0.00959888	0.00563282	0.00554069	0.0063642	0.0103192	0.0103405	0.00971098	0.00886277	0.0100831	0.0101378
FBti0020019	17.6{}908	0.0017431	0.00194119	0.00200559	0.00327614	0.00351287	0.0033265	0.00187565	0.00227505	0.00174345	0.00142288	0.00193278	0.00150056	0.000860852	0.00065767	0.000889915	0.00223903	0.00182101	0.00206216	0.00295364	0.00319119	0.00334446
FBti0020020	pogo{}909	0.00214125	0.00246939	0.00231347	0.000659091	0.00115373	0.000989109	0.00131662	0.00148219	0.000658979	0.001648	0.000989689	0.00197818	0.00164608	0.00197484	0.00181199	0.000823638	0.000960775	0.000660831	0.000494087	0.000329169	0.000494204
FBti0020021	copia{}910	0.0208131	0.0176487	0.0200746	0.461729	0.444033	0.405618	0.474749	0.475931	0.436754	0.0435668	0.0477972	0.0544477	0.0314441	0.0289267	0.0274359	0.0320504	0.0383442	0.0326275	0.0684042	0.0530279	0.0586972
FBti0020022	roo{}911	0.000252552	0.000376949	0.000266888	0.000414341	0.000323478	0.000758303	0.00017496	0.000218847	0.000208819	0.00024595	0.000236055	0.000235912	0.000289412	0.000208598	0.000208796	0.00024921	0.000183327	0.000236426	0.000282832	0.000215346	0.000245853
FBti0020023	F{}912	0.000568418	0.000859469	0.000760359	0.000408248	0.000824015	0.00117427	0.000487859	0.000422609	0.000634134	0.000349985	0.000532747	0.000415729	0.000335011	0.00037134	0.000204066	0.000517458	0.000538436	0.00047511	0.000451777	0.000582545	0.000451884
FBti0020025	mdg1{}914	0.00139313	0.00149216	0.00121409	0.0018471	0.00133994	0.0014401	0.00157897	0.00149687	0.00160138	0.000715663	0.000578875	0.000615984	0.00132991	0.00134207	0.00131423	0.00295289	0.00192038	0.00192289	0.00114766	0.00159567	0.00121032
FBti0020026	S{}915	0.00217316	0.00218969	0.0018789	0.00162606	0.00190939	0.00190977	0.00105921	0.00121892	0.000918922	0.00206827	0.00249477	0.00198046	0.00252494	0.00171233	0.00169628	0.00201435	0.00223294	0.0016658	0.0017843	0.00151828	0.00229717
FBti0020027	pogo{}916	0.000669645	0.000167325	0	0	0	0	0.000167275	0	0	0	0	0.000167551	0.000334613	0.000167268	0.000334853	0	0	0	0.000167396	0	0
FBti0020028	Tirant{}917	0.000154493	0.000154413	0.0001586	0.000122203	0.00018695	0.0003524	0.000236935	0.000197579	0.00019046	2.51636e-05	4.31763e-05	1.79793e-05	0.00017953	0.000215387	0.000150914	0.000298237	0.00055188	0.000529742	0.000377214	0.000247716	0.000370117
FBti0020024	Tirant{}913	0.000130431	0.000108015	0.000164504	0.000115567	0.000160348	0.000298381	0.000175007	0.000167672	0.000167731	5.22004e-05	2.61237e-05	0	0.000186213	0.000137766	0.000167712	0.000395058	0.000565176	0.000456014	0.000272015	0.000234594	0.000387621
FBti0020029	Doc{}918	0.000858961	0.000572344	0.000430879	0.000859282	0.000859522	0.00114626	0.00128739	0.00121669	0.00114551	0.00150399	0.00172039	0.00100296	0.00171685	0.000500632	0.00150332	0.000572698	0.0012526	0.000717959	0.00114517	0.000786775	0.00128863
FBti0020030	jockey{}919	0.000562871	0.000482211	0.000322688	0.000160881	0.000160925	0.000563351	0.000401723	0.000321595	8.04265e-05	0.000482722	0.000402629	0.000321909	0	0.000160683	0.00128668	0.000160836	0.000390867	0	0.000160805	0	0.000402108
FBti0020031	copia{}920	0.0196077	0.0171435	0.0191917	0.439115	0.42948	0.39372	0.446413	0.4408	0.40145	0.0395108	0.0434011	0.0508462	0.0291542	0.0253423	0.0261421	0.0298869	0.0363158	0.0303309	0.0643284	0.0486552	0.0540251
FBti0020032	pogo{}921	0.00214125	0.00148163	0.00148723	0.000329546	0.000164819	0.00131881	0.00131662	0.00181156	0.00164745	0.000988801	0.00230927	0.00214303	0.00148147	0.000987421	0.00181199	0.00065891	0.000640517	0.000826039	0.000164696	0.000987507	0.000164735
FBti0020033	412{}922	0.000337658	0.000440374	0.00052053	0.000432529	0.000399685	0.000486312	0.00207778	0.00182391	0.00186985	0.00192404	0.00208247	0.00199467	0.000534976	0.000448454	0.000391225	0.000115309	0.000176142	0.000136296	0.000193517	0.000197501	0.000123551
FBti0020035	X{}924	0.000421184	0.000369154	0.000318542	5.18574e-05	0.000188035	0.000389117	9.06426e-05	0.00011014	6.48107e-05	0.000103732	6.48908e-05	3.8911e-05	7.77084e-05	7.76905e-05	8.42445e-05	8.42452e-05	0.000138589	0.000103989	0.00014902	0.000155394	0.000103691
FBti0020034	FB{}Cip4[FB]	0.00114796	0.0020796	0.000683823	0.000825408	0.00114871	0.00183113	0.000215068	0.000681506	0.000466455	0.000681972	0.000826286	0.00104121	0.000932137	0.000824392	0.000538157	0.00100457	0.00118578	0.00053973	0.0012196	0.00125462	0.000896975
FBti0020037	diver{}926	0.000304764	0.000499354	0.00035588	0.00032487	0.000389953	0.000615048	0.000439301	0.000444592	0.000464735	0.000284933	0.000455302	0.000370022	0.000269622	0.000209658	0.000294799	0.000679542	0.000820858	0.000551231	0.00056451	0.000968504	0.00064959
FBti0020036	Rt1a{}925	0.000235302	4.70359e-05	9.44271e-05	0	0.000141273	0.000235502	0	9.41072e-05	0.00018828	0	0.000188512	0	0	9.40401e-05	9.41293e-05	0.00028239	9.15024e-05	0.000283213	0	0.000282145	9.41341e-05
FBti0020039	Doc{}928	0.00203074	0.00198429	0.00177048	0.00273246	0.00274621	0.00272728	0.00171143	0.00189422	0.00164179	0.00249273	0.00304075	0.00250645	0.00201002	0.0014391	0.00219314	0.00196606	0.00182287	0.00204988	0.00202406	0.00195138	0.00217379
FBti0020038	roo{}927	0.000316671	0.000404052	0.000253486	0.000279719	0.000414638	0.000600166	0.00012118	0.000235785	0.000188694	0.000165163	0.000273269	0.000192184	0.000205371	0.000198592	0.000168458	0.000195413	0.000212883	0.00020274	0.000303167	0.000249103	0.000293131
FBti0019620	HMS-Beagle{}101	0.00116109	0.00128219	0.00142664	0.000656893	0.000704942	0.00119255	0.000751704	0.000960915	0.000826413	0.00298479	0.00280021	0.00326421	0.00317688	0.00335863	0.00360102	0.000713251	0.000591876	0.000833097	0.000869649	0.000760429	0.00108732
FBti0019623	297{}104	7.40007e-05	0.000369811	0.00044545	0.000148057	0.000148098	0.00059251	0.000221821	0.00029596	0	0.000370203	0.000444643	0.000518437	0.000369772	0.000147875	0.000148015	0.000148016	0.000287768	0.000371119	0	0	0
FBti0019624	hopper{}105	8.53973e-05	0.000384089	0.000449796	0.000576647	0.00012818	0.000491453	4.26638e-05	0.00017077	0.000170829	0.000213609	0.000299321	0.000128203	8.53438e-05	6.39931e-05	4.27026e-05	0.000661895	0.000290576	0.000535342	0.000597725	0.000554655	0.000405695
FBti0019625	Stalker2{}106	3.36247e-05	0.000121826	4.21677e-05	9.67071e-05	0.000113557	7.15133e-05	0.000335973	0.000281566	0.000340519	0.000555107	0.000526142	0.00054265	9.66104e-05	2.93964e-05	7.56624e-05	0.000277431	0.000310548	0.000345692	0.000340418	0.000235192	0.000248017
FBti0019622	gypsy5{}103	0.000257937	0.000349282	0.000313037	0.000482773	0.00057033	0.00059959	0.000203687	0.000207984	0.00011235	0.000628541	0.000729096	0.000416375	0.000469817	0.000415672	0.000436869	0.000145624	0.000113247	0.000158567	0.00037439	0.00019954	0.000503465
FBti0019621	flea{}102	0.0211078	0.0148496	0.0186964	0.124197	0.129582	0.16561	0.0970974	0.0928721	0.093924	0.0172655	0.012837	0.0222923	0.0149639	0.0198151	0.0110738	0.0233076	0.0261285	0.0207	0.0220397	0.0286792	0.021117
FBti0019627	pogo{}Kmn1[pogo108]	0.00280009	0.00279864	0.00198297	0.000988637	0.00230746	0.00197822	0.000987462	0.002635	0.000329489	0.0014832	0.000824741	0.00197818	0.0019753	0.00230398	0.00247089	0.000823638	0.000320258	0.000991247	0.000658782	0.000329169	0.000329469
FBti0019629	FB{}Ptp10D[FB]	0.000927774	0.00169675	0.00168335	0.000819511	0.00135306	0.00286472	0.00072978	0.000296056	0.000473853	0.000276507	0.000523859	0.000414883	0.000345232	0.000640997	0.000483671	0.000898254	0.00117064	0.00119786	0.000819127	0.00138073	0.00109572
FBti0019628	297{}109	0.000332006	0.000362397	0.000328704	0.000275318	0.000319108	0.000419733	0.000174597	0.00014414	0.0002141	0.000144238	0.000188116	0.000170514	0.000410382	0.000253156	0.000244658	0.000183495	0.000186867	0.000122687	0.000231509	0.000157145	0.000104859
FBti0019626	Burdock{}107	0.000386954	0.000410627	0.000277981	0.000291519	0.000439791	0.000769787	0.000505972	0.000477653	0.00050171	0.00047798	0.000641068	0.000540276	0.000921425	0.00107873	0.00105586	9.55538e-05	0.000106819	0.000114999	0.000105089	0.000167074	0.000124225
FBti0019630	roo{}111	0.000159902	0.000246207	0.000199444	0.000363156	0.000423799	0.000523367	0.00025477	0.000220373	0.000185869	8.2156e-05	0.000181771	0.000151384	0.00016412	0.000159765	0.000172882	0.000233393	0.000197468	0.000143045	0.000142601	0.000263419	0.000237726
FBti0019631	I{}112	0.0030351	0.00366076	0.00333689	0.0049824	0.0045385	0.00421394	0.00220037	0.00291488	0.00276182	0.00134142	0.000856993	0.000810797	0.00348362	0.00250239	0.00408521	0.000775968	0.000892966	0.000801119	0.000844272	0.000866505	0.000855884
FBti0019632	X{}113	0.000197494	0.000148044	0.000148603	0	0.000197623	0	4.93333e-05	4.93664e-05	9.87671e-05	0.000197601	0.00032139	0.000247074	0.000123357	9.86625e-05	4.93781e-05	0.00032096	0.000192	0.000594269	0.000493689	0.000345349	0.000197522
FBti0019633	flea{}114	0.0177921	0.0125189	0.0153161	0.111958	0.11352	0.150776	0.0848996	0.0788223	0.0799096	0.015434	0.0125035	0.020287	0.0133059	0.0179839	0.0107974	0.0391419	0.0426272	0.0373139	0.0363458	0.0452941	0.0365855
FBti0019634	1360{}115	0.000189405	0.000189307	0	0.00094738	0.000568586	0.000995224	9.46254e-05	0.000520789	0.000378887	0.000189507	0.00085355	9.47816e-05	0	0	9.47112e-05	9.4712e-05	0	4.7494e-05	9.46936e-05	0.0012775	0.000284148
FBti0019635	HMS-Beagle{}116	0.00103756	0.00131472	0.00150697	0.000655776	0.000699399	0.00113403	0.000824167	0.000855106	0.000772902	0.00301446	0.00312586	0.00308487	0.00335803	0.00343534	0.00383368	0.000759797	0.000628854	0.0008012	0.0010201	0.000880598	0.00140677
FBti0019045	jockey{}117	0.000314756	0.000419457	0.000421042	0.000104958	0.000524936	0.000525041	0.000209666	0.000104904	0.00010494	0.000104975	0.000210139	0.000315019	0.000104853	0	0.000104928	0	0	0.00021047	0.000419635	0.000314514	0.000209868
FBti0019046	jockey{}118	0.00050685	0.000619162	0.000621501	0.000845066	0.000901655	0.000676376	0.000450166	0.00039416	0.000816758	0.00112694	0.00104336	0.00152182	0.000816081	0.000815893	0.000957471	0.000957479	0.001095	0.00129919	0.000929138	0.00118174	0.00132363
FBti0019047	mdg3{}119	0.00365193	0.0038331	0.0040703	0.00616286	0.00647003	0.00599361	0.00825729	0.0082129	0.00771059	0.0100399	0.0099211	0.00887082	0.00525261	0.00442515	0.00405746	0.00736565	0.00709529	0.00657994	0.00694246	0.00748126	0.00673873
FBti0019049	diver{}121	0.000241392	0.000385001	0.000278247	0.000380207	0.000421427	0.00066311	0.000477259	0.00038001	0.000333908	0.000411102	0.000401185	0.000467766	0.00034903	0.000266844	0.000308189	0.000734522	0.000813881	0.000613027	0.000780599	0.000851921	0.000621546
FBti0019050	copia{}122	0.0205369	0.0181667	0.0193619	0.43792	0.427049	0.399261	0.453708	0.454893	0.407547	0.0396341	0.0421084	0.0496317	0.028731	0.0249463	0.0240972	0.0302605	0.0351634	0.0305319	0.0638979	0.0497955	0.0540288
FBti0019051	roo{}123	0.000330183	0.000316542	0.000277175	0.000330307	0.000330399	0.000748603	0.000235653	0.000198755	0.000239263	0.000158439	0.000195696	0.000178717	0.000181824	0.000232277	0.00014152	0.000276303	0.000209631	0.00021628	0.000229085	0.000255863	0.000242618
FBti0019052	297{}124	0.000350129	0.000366351	0.000296383	0.000191548	0.000251819	0.000350427	8.74609e-05	9.84596e-05	0.000103966	0.000218949	0.000126009	0.000142359	0.000191357	0.000235041	0.000257149	0.000180553	0.000228699	0.00015913	0.000153167	0.000120264	0.000109431
FBti0019048	I{}120	0.0020163	0.00271247	0.00291446	0.0038716	0.00343281	0.00287878	0.00199556	0.00239819	0.00246593	0.00106128	0.000775143	0.0006886	0.00258803	0.00204322	0.00344045	0.000649867	0.000891849	0.000469652	0.000745291	0.0006684	0.0009175
FBti0019053	17.6{}125	0.00147855	0.00187583	0.00196283	0.00246019	0.0029391	0.00271547	0.0022185	0.00206071	0.00189711	0.000971287	0.00160032	0.000812135	0.00130847	0.000915218	0.00118494	0.00144384	0.00128738	0.00162282	0.00218028	0.0021987	0.00236004
FBti0019054	F{}126	0.000678198	0.00123185	0.000915931	0.000606692	0.000783046	0.00177526	0.000456107	0.000469454	0.000613111	0.000580694	0.000574685	0.000352435	0.000417091	0.000241075	0.000241304	0.000665222	0.000672011	0.000444774	0.000515121	0.000423548	0.000795692
FBti0019056	pogo{}sbm[pogo128]	0.00181182	0.00181088	0.00115673	0.00131818	0.00164819	0.00115396	0.00181035	0.000494063	0.00247117	0.0019776	0.00263917	0.000494546	0.00213991	0.00115199	0.00181199	0.000823638	0.0011209	0.00247812	0.00131756	0.000987507	0.000494204
FBti0019058	Doc{}130	0.00208308	0.00235442	0.00210289	0.00296026	0.00268186	0.00283177	0.00147188	0.00168699	0.00189528	0.00210369	0.00275545	0.00257843	0.00202341	0.00168579	0.00231691	0.00282964	0.00348248	0.002916	0.00315353	0.0023214	0.00293361
FBti0019057	I{}129	0.00232153	0.00340353	0.00330193	0.00437662	0.00396688	0.00326548	0.00190929	0.00229839	0.00260727	0.000867479	0.000885395	0.000696471	0.00305544	0.00223976	0.00368513	0.000627505	0.000815165	0.00061217	0.000821301	0.000797948	0.000878544
FBti0019055	opus{}127	0.00131344	0.00157451	0.00121263	0.000399017	0.000524108	0.000725833	0.00123589	0.00128103	0.00135804	0.00233	0.00203756	0.00198391	0.000994532	0.000845359	0.00118865	0.000354585	0.000235013	0.000282878	0.00112398	0.00121984	0.00116051
FBti0019060	roo{}132	0.000289744	0.000369482	0.000354171	0.000326501	0.000453229	0.000676646	0.000212971	0.000176485	0.000199864	0.000153281	0.000236798	0.000296652	0.000232982	9.98262e-05	0.000129897	0.000256466	0.000262258	0.00015366	0.000236436	0.000292849	0.000136566
FBti0019061	rover{}133	0.000278884	0.000385317	0.000242761	0.000365147	0.000443223	0.000628025	0.000270461	0.000360857	0.000365085	0.000233897	0.000332679	0.000316059	0.000250019	0.000159812	0.000172268	0.000147659	0.000179422	0.000534769	0.000258354	0.000188512	0.000237906
FBti0019636	HB{}134	0.000652904	0.000702763	0.00136045	0.000703391	0.00110564	0.000854526	0.00060219	0.000703027	0.000452103	0.000804009	0.000905322	0.00145769	0.0012548	0.00105379	0.00105479	0.000502284	0.000292958	0.000402999	0.000652843	0.000752772	0.000904151
FBti0019059	copia{}131	0.0241947	0.0202014	0.0222367	0.500393	0.488951	0.452506	0.521207	0.513521	0.4672	0.0455265	0.047827	0.0575639	0.0325508	0.0285162	0.0271739	0.036379	0.0397159	0.0340248	0.0730832	0.0579774	0.0644609
FBti0019062	S{}135	0.000169261	0.000169173	0	0	0.000112914	0.000112937	0	0.000112825	0	0	0	0	0	0	0	0.000112852	0.000164553	0	0.00022566	0	0.000112857
FBti0019063	I{}137	0.000162959	0	0.000490469	0.00065208	0.000815326	0.000326196	0	0	0	0	0	0	0	0	0	0	0	0	0	0	0
FBti0019637	1360{}136	0.00027675	5.53214e-05	0	2.76854e-05	0.000166159	0.000110795	0.00033183	0.00024904	0.000110723	0.00013845	0.000194004	0	0.000110631	5.53027e-05	0.00011071	5.53556e-05	0.000215241	8.32755e-05	2.76724e-05	0.000110615	0.000138395
FBti0019064	Juan{}138	0.000231983	0.000181143	0.000261831	0.000246574	0.00013783	0.000478873	0.000195576	0.000144969	0.000210277	0.00286509	0.00286766	0.00311262	0.00281828	0.00245547	0.0026463	0.000522014	0.000563825	0.000567164	0.000579903	0.000702658	0.000775805
FBti0019066	rover{}140	0	8.14372e-05	0.00016349	0.00016302	0	0	8.1413e-05	0	0	0.00024457	0	0	0.000325714	0	0	0.000244463	0	0	0.000162944	0	0
FBti0019065	pogo{}CG18210[pogo139]	0.000694366	0.000694006	0.00135103	0.00214703	0.00210551	0.00197958	0.0036372	0.00458637	0.00311476	0.00785268	0.00682722	0.00705475	0.00571968	0.00580245	0.00448223	0.010143	0.011394	0.00886403	0.00908903	0.00746395	0.00824941
FBti0019638	jockey2{}141	0	0	0	0	0	0	0	0.000201526	0	0.000201663	0	0	0	0	0	0	0.000391895	0	0	0.000201399	0.00060475
FBti0019067	roo{}142	0.000321437	0.000324963	0.00030395	0.000340038	0.000395589	0.000613839	0.000191967	0.000184707	0.000192162	0.00014417	0.0001369	0.000203377	0.000184618	0.00019565	0.000199531	0.000203228	0.000215514	0.000259407	0.000206882	0.000251045	0.000181065
FBti0019069	mdg3{}144	0.00341328	0.0037277	0.00393666	0.00594078	0.00678659	0.00633245	0.00784137	0.00830723	0.00742193	0.0101843	0.00936529	0.00849311	0.00535799	0.00440297	0.0045237	0.00818159	0.006955	0.00679148	0.0064763	0.00768091	0.00698296
FBti0019068	roo{}143	0.000333332	0.000370177	0.00033104	0.000380613	0.000424518	0.000697562	0.000148027	0.000168326	0.000138075	0.000185285	0.00021917	0.000229147	0.000198528	0.000198483	0.000239078	0.000296325	0.00020622	0.00026004	0.000262601	0.000242237	0.000276133
FBti0019070	jockey{}145	0.00027032	0	0.0003616	0.000180281	0.000270496	0	0.000720266	0.000540563	9.0125e-05	0.000721243	0.000270709	0.000541091	0.000720402	0.000540177	0.00054069	0.000270347	0.0001752	0.000180757	9.00982e-05	0.000450187	0.000180239
FBti0019073	flea{}148	0.0199206	0.0139798	0.0172168	0.118995	0.120534	0.15872	0.0948835	0.0873456	0.0876623	0.0164388	0.0138486	0.0214371	0.0156586	0.0199401	0.0121728	0.0221037	0.0237194	0.0189663	0.0212466	0.0263456	0.0194482
FBti0019072	Tirant{}147	9.89863e-05	0.000104431	0.000104826	9.35221e-05	5.50283e-05	0.000231165	0.000153853	0.000159455	0.000126508	4.40177e-05	4.40572e-05	1.10077e-05	0.000126403	0.000186814	9.89954e-05	0.000170494	0.000251274	0.000176506	0.000203453	0.0001099	0.000121001
FBti0019071	pogo{}146	0.00214125	0.00263401	0.00214822	0.00131818	0.000824093	0.000494555	0.000822885	0.00296438	0.00115321	0.0018128	0.00280412	0.00280243	0.00115226	0.00131656	0.00263562	0.00115309	0.0011209	0.00165208	0.000823478	0.000493753	0.000658939
FBti0019075	jockey{}150	0.000228629	0.00022851	0.000573434	0.000228714	0	0.000343236	0	0	0.000457351	0.000114376	0.000228958	0.000343229	0.00102819	0.000228433	0.000114325	0.000228652	0.000444538	0	0	0.000228453	0.000228662
FBti0019074	X{}149	0.000141835	0	0	0	0	0.000141956	0	0	0	0	0.000284077	0	0	0	0	0	0	0	0	0	0
FBti0019076	mdg1{}151	0.000481919	0.000688099	0.000828837	0.000619842	0.000551124	0.000275617	0.000756684	0.000344178	0.000275438	6.88828e-05	0.000344723	0.000137806	0.00027521	0.000343933	0.00110163	0.000688524	0.000602374	0.000345266	0	0	0
FBti0019077	flea{}152	0.0191985	0.0165715	0.018085	0.0605106	0.0656447	0.0801707	0.0556406	0.053249	0.0534849	0.0174875	0.0174748	0.0201606	0.0190448	0.0195976	0.0163925	0.0249199	0.0279369	0.0234945	0.0247165	0.0279113	0.0216026
FBti0019639	1360{}154	0.0121651	0.0101472	0.0122944	0.0116327	0.00926401	0.0102059	0.0100995	0.0102852	0.00863358	0.0100684	0.0102119	0.00913141	0.0101014	0.00853507	0.00854316	0.00992983	0.0125223	0.0103625	0.00943598	0.0121557	0.00908037
FBti0019078	297{}153	0.000168393	0.000157085	0.000135153	0.000157225	0.000235904	0.000202244	6.73022e-05	2.24492e-05	6.73708e-05	0.000123555	0.000134908	0.000168533	0.000302917	0.000201898	0.000213317	8.98185e-05	5.45695e-05	0.000180161	0.000157152	0.000112176	0.00010105
FBti0019080	Transpac{}156	0.00138196	0.00125885	0.00153271	0.00240329	0.00224058	0.00296469	0.00383952	0.00408697	0.00398341	0.00250287	0.00274453	0.00236354	0.000740078	0.000897211	0.000658968	0.00258341	0.00208046	0.00229851	0.00247213	0.00400284	0.00300341
FBti0019079	BS{}155	0.000387801	6.46e-05	0.000389064	0.000258631	0.000129351	0.000129377	0.000387485	0.000258497	0.000129293	0.000129337	0.000453086	0	0	0.000258313	0	0.00012928	0	0.000324142	0	0	0
FBti0019081	transib2{}157	0.000544087	0.000669298	0.000650831	0.000858304	0.000984184	0.00186404	0.000230003	0.000606779	0.000418613	0.00046063	0.000377218	0.000230383	0.000271873	0.00014636	0.000167427	0.00138128	0.000651017	0.000629685	0.000711431	0.00106643	0.000690671
FBti0019083	roo{}162	0.00024566	0.000391429	0.00030361	0.000341916	0.000366949	0.000577258	0.000117394	0.000185108	0.000185173	0.000199484	0.000228186	0.000238738	0.000185019	0.000224106	0.000145985	0.000341822	0.000204214	0.000157125	0.000245637	0.000224126	0.000195844
FBti0019082	Rt1b{}161	0.00555855	0.00841378	0.00768804	0.00673382	0.00876123	0.00678528	0.00585901	0.00825631	0.00790567	0.00831018	0.00931512	0.00712281	0.0104519	0.0084912	0.00711752	0.00865999	0.0105267	0.0105383	0.00959	0.0113975	0.0111508
FBti0019086	412{}165	0.000312524	0.000388221	0.000309062	0.000942389	0.000871171	0.000929434	0.00148551	0.00145526	0.00137092	0.00158133	0.00157828	0.00173819	0.00043726	0.000303335	0.000361668	0.000125022	0.000112851	0.000228383	0.000209818	0.000258749	0.000209868
FBti0019085	invader3{}164	0	0	0	0	0	5.24143e-05	0	0	0	0	0	0	0	0	0	0	0	0	0	0	0
FBti0019084	Doc{}163	0.00170129	0.00213525	0.00170683	0.00308556	0.00280702	0.00319752	0.00182967	0.00207762	0.00167566	0.0023844	0.00262064	0.00304149	0.00210257	0.00163496	0.0024158	0.00176641	0.00187492	0.00160221	0.00220758	0.00171945	0.00213017
FBti0019644	NOF{}kek5-FB-NOF	0.000425504	0	0	0	0.000425782	0	0	0	0	0	0	0	0	0	0	0	0	0	0.000425464	0	0
FBti0019090	Tc1{}172	0.00316927	0.00339389	0.00393664	0.00303835	0.00362439	0.0024545	0.00284625	0.00422509	0.00318878	0.00464322	0.00434513	0.00387049	0.00410993	0.00335504	0.00254697	0.00411292	0.00394308	0.00461687	0.0048855	0.00456175	0.0052074
FBti0019089	jockey{}171	0.000610284	0.000487974	0.000673499	0.000366308	0.000122137	0.000610805	6.09787e-05	0.000183059	0.000305204	0.000488491	0.000122233	0.000183238	0.000304951	0.000243905	0	0.000732414	0.000949292	0.000550912	0.000610227	0.000487852	0.000305186
FBti0019088	Idefix{}170	0.00130577	0.00159238	0.00155307	0.00170881	0.0022722	0.00329597	0.00114059	0.00108798	0.00152781	0.000497117	0.000699057	0.000349317	0.000841242	0.000693352	0.000492788	0.00122377	0.000970047	0.00108318	0.00112088	0.00112013	0.00100616
FBti0019087	pogo{}169	0.00214125	0.0044449	0.00214822	0.000988637	0.00197782	0.00148366	0.00164577	0.000988125	0.000988468	0.0018128	0.00230927	0.00230788	0.00230451	0.00213941	0.00247089	0.000823638	0.000960775	0.000165208	0.00181165	0.000164584	0.000988408
FBti0019091	S{}173	0.000477862	0.000459925	0.000337368	0.000265578	0.000602145	0.00081483	0.000318315	0.000336225	0.000389448	1.77082e-05	8.86203e-05	7.08535e-05	0.000229938	0.000335986	0.000424805	0.000123903	0.000326919	0.000301783	0.000176969	0.000229905	0.000123908
FBti0019646	Stalker{}174	0.000388442	0.000573921	0.000495606	0.000388588	0.000405596	0.000921224	0.000232032	0.000249074	0.000240714	0.000261918	0.00036786	0.000219738	0.000367101	0.000215148	0.000198462	0.000447598	0.000574664	0.000563246	0.00063327	0.00052315	0.000667203
FBti0020169	invader3{}1058	0	9.08617e-05	0	0.000181886	0.000272904	0.000727891	0.000363339	0.000363583	0.000727419	0	0	0.000181969	0	9.0831e-05	0	0.000181836	0.00017676	0.000182366	0.000181801	0.000181678	0.000363687
FBti0020172	pogo{}1061	0.000172275	0.000286976	0.00028806	0.000746805	0.000919401	0.000747162	0.00137708	0.00123446	0.00163695	0.00252807	0.00287539	0.00298859	0.00206601	0.00189341	0.0018952	0.00367557	0.00460578	0.00383028	0.00310066	0.00278297	0.00269936
FBti0020173	Rt1b{}1062	4.51862e-05	0.000135488	9.06668e-05	0	9.04315e-05	2.26124e-05	0	0	9.03909e-05	0	0.000135754	0	0	4.51476e-05	0	0	0	2.26612e-05	0	0	0
FBti0020174	17.6{}1063	0.00179571	0.00196945	0.00202072	0.00471167	0.0045862	0.00376502	0.00188156	0.00211872	0.00183977	0.0014863	0.00140451	0.000944517	0.000908208	0.0005675	0.000777775	0.002613	0.00278217	0.00302378	0.00398426	0.00379385	0.00436538
FBti0020171	mdg3{}1060	0.00389058	0.00333385	0.00393109	0.00520234	0.00622011	0.00552701	0.0081852	0.00810191	0.00752185	0.00940686	0.00915409	0.00813205	0.00468131	0.00421997	0.00428503	0.0073823	0.0062158	0.00572265	0.0059047	0.00672149	0.00616699
FBti0020170	roo{}1059	0.000299735	0.000286265	0.000354171	0.000336495	0.000456561	0.00075331	0.000173039	0.000159836	0.000256492	0.000199931	0.000193441	0.000226656	0.000133132	0.000239583	0.000163204	0.000249804	0.000233118	0.00023383	0.000293047	0.000249587	0.0002698
FBti0020167	S{}1056	0.000901587	0.00088345	0.000673958	0.000636652	0.000548381	0.00111467	0.000529913	0.000441891	0.000583498	0.000689821	0.000407183	0.000194622	0.000812687	0.000494565	0.000335916	0.000777917	0.0011343	0.000797916	0.000883825	0.000512273	0.000671867
FBti0020168	Cr1a{}1057	0.000107836	0.000129336	0.000129825	0.000118664	9.7116e-05	0.000215856	2.15497e-05	0.000107821	0.000118644	5.39473e-05	0.000107991	0.000161889	4.31075e-05	0.000118518	0.000107846	8.62776e-05	7.33855e-05	0.000108161	9.70435e-05	7.54273e-05	5.39258e-05
FBti0020166	roo{}1055	0.00035569	0.000415874	0.000340015	0.000359179	0.00040293	0.000866473	0.000191111	0.000177819	0.000231581	0.00019137	0.000221786	0.000194785	0.00017438	0.000217925	0.000224843	0.000228201	0.000257715	0.000191844	0.00021138	0.000228003	0.000211431
FBti0020165	412{}1054	0.000742846	0.000701666	0.000794403	0.000796204	0.000784173	0.000902796	0.00262639	0.00249756	0.00209835	0.00233184	0.00248108	0.00240197	0.000783171	0.000815616	0.00086129	0.000122459	0.000206338	0.000212882	0.000163247	0.000199843	0.000167368
FBti0020161	Cr1a{}1050	0.000265889	0.000738196	0.000518689	0.000310319	0.000325187	0.000798346	0.000413267	0.000531701	0.000517111	0.000162575	7.39642e-05	7.39196e-05	0.000324772	0.00028042	0.000192048	0.000118185	0.00021541	8.88968e-05	0.000369255	8.85614e-05	0.000177284
FBti0020162	Stalker4{}1051	0.000354587	0.000425283	0.000426889	0.000425663	0.000496745	0.00156151	0.000496017	0.000425443	0.000638386	0.000709556	0.000355097	0.000283906	0.000283492	0.000283426	0.000141848	0.000141849	0.000413667	0.000497918	0.000567285	0.000708628	0.000425565
FBti0020164	Doc{}1053	0.0014709	0.00201416	0.00200226	0.00268362	0.00272327	0.0033918	0.00162509	0.0017428	0.00199617	0.00230804	0.0027319	0.00258758	0.00223412	0.00158618	0.00245605	0.00182747	0.00193395	0.00160532	0.00211868	0.001541	0.00202845
FBti0020163	Doc{}1052	0.00133681	0.00138152	0.00172528	0.00195403	0.00201301	0.00205888	0.00138111	0.00134311	0.00130463	0.00211667	0.00230704	0.00243554	0.00165375	0.00136808	0.00205732	0.00177826	0.00186742	0.00152309	0.00155081	0.0014525	0.00188867
FBti0020160	F{}1049	0.000677621	0.001068	0.000790953	0.000586622	0.000977975	0.00163028	0.000436188	0.000495113	0.000808097	0.000449818	0.000502422	0.00057385	0.000462317	0.00037758	0.000195485	0.000625559	0.000810795	0.000607776	0.000475593	0.000507825	0.000651652
FBti0020159	Doc{}1048	0.00121055	0.00123319	0.00123785	0.00172335	0.00209655	0.00163098	0.00155848	0.00179229	0.00193262	0.00174693	0.00219145	0.00221343	0.00172163	0.000883877	0.00214194	0.00165303	0.00178795	0.00198475	0.0017691	0.00174465	0.00176952
FBti0020156	jockey{}1045	0	0.00011383	0.000342781	0	0.000227928	0.00034196	0.000113797	0.000569366	0	0.000341853	0.00034216	0.000341954	0.000455273	0.000341376	0	0	0	0	0.000341636	0.000227604	0.000113906
FBti0020158	mdg1{}1047	0.00264906	0.00306204	0.00323581	0.00319334	0.00284991	0.00294591	0.00338423	0.00302174	0.00280717	0.000775653	0.000614438	0.000659707	0.0025894	0.00284147	0.00257468	0.00243788	0.00184185	0.00165494	0.00129746	0.00136701	0.00129362
FBti0020157	BS{}1046	0	0	0	0	0	0	0	0	0	0	0	0	0	0	0	0	0	0	0	0.00022345	0
FBti0020155	1360{}1044	0.000222002	8.32076e-05	0.000139203	0.000222085	0.000249915	8.33217e-05	0.000221821	0.000249716	0.000305315	0.000305418	0.000389063	0.000194414	0.000305062	0.000194085	0.00019427	5.5506e-05	0.00016187	0	5.54953e-05	8.31867e-05	5.55084e-05
FBti0020154	roo{}1043	0.000316204	0.000337346	0.000384958	0.000323431	0.000401735	0.000554718	0.000234297	0.000159856	0.000127929	0.000152855	0.000185014	0.000284466	0.000195285	0.000127793	0.000135021	0.000216746	0.000234874	0.000192433	0.000220256	0.00029466	0.000234522
FBti0020153	Stalker2{}1042	1.55219e-05	0.000108597	4.67172e-05	2.71734e-05	0.000112607	8.5443e-05	0.000418749	0.000372471	0.000426938	0.000543559	0.000450782	0.000497114	5.04145e-05	4.26486e-05	6.20931e-05	0.000178519	0.000264076	0.000280236	0.000329808	0.000259791	0.000205694
FBti0020147	gypsy2{}1036	4.17672e-05	0.000166982	0.00012571	0	0	6.27043e-05	0	0	0	0	0	0	0	0	0	2.08857e-05	0	0	0	2.08676e-05	0
FBti0020148	F{}1037	0.000783698	0.00105339	0.000822399	0.000522661	0.000766181	0.00159578	0.000630047	0.000531397	0.000792867	0.000549786	0.000820909	0.000369637	0.000558148	0.000342012	0.000252248	0.000657651	0.00071811	0.000587287	0.000711566	0.000522063	0.000639661
FBti0020149	BS{}1038	0.000155636	0.000251281	0.000168153	0.000161682	0.000185687	0.00049726	0.000119622	0.000173569	0.000137706	0.000149731	5.9946e-05	2.99549e-05	0.000101698	0.000149522	5.38788e-05	8.38122e-05	6.98336e-05	6.00403e-05	8.37959e-05	9.57021e-05	0.000143684
FBti0020152	Doc{}1041	0.00454757	0.0042741	0.00505864	0.00475678	0.00467827	0.00424802	0.0048149	0.00559989	0.00467617	0.00635408	0.00706288	0.0061164	0.0051188	0.00470311	0.00668634	0.00481931	0.00556899	0.00464131	0.00403659	0.00454408	0.00499507
FBti0020151	Cr1a{}1040	0.000136161	0.000362908	9.10697e-05	0.000408637	9.08334e-05	0.00031798	0.0001814	0.000226903	0.000226982	0.000363293	0.000227262	9.08499e-05	4.53587e-05	9.06964e-05	0.000226956	0.00027235	0.00039712	0.000364191	0.000226914	0.000498874	0.000453936
FBti0020150	roo{}1039	0.000259145	0.000376742	0.000293753	0.000360245	0.0003233	0.000757886	0.000184952	0.000201902	0.000171676	0.000181836	0.00018537	0.000195363	0.000174897	0.000184945	0.000124535	0.000238975	0.000258479	0.000138402	0.000302868	0.000326204	0.00028611
FBti0020146	S{}1035	0.000168331	0.000280406	0.000168879	5.61314e-05	0.000336882	0.000505424	0.000168194	5.61023e-05	0.000112244	0.000280704	0.00050572	0.000112314	0.000112151	0	0	0.000168348	5.45495e-05	0.000225118	0.000617156	0	0.000224474
FBti0020138	invader4{}1027	8.85441e-05	0	0	0.00425171	0.00239225	0.00372202	0.0028311	0.00274447	0.00212549	8.8592e-05	0.000177343	0.000354472	0	0	0.000177105	8.8553e-05	0.000344324	0.000177622	0.000708286	0.00044238	0.000354227
FBti0020140	Doc{}1029	0.0016374	0.0018054	0.00159058	0.00280802	0.00293234	0.00311501	0.00190225	0.00183207	0.00139727	0.00268497	0.00262231	0.00245165	0.00178573	0.00168144	0.0025408	0.00222891	0.00201508	0.00148592	0.00211802	0.00151278	0.00212503
FBti0020143	1360{}1032	2.2136e-05	4.42491e-05	2.22081e-05	0.00136188	0.00090817	0.000919429	2.2118e-05	2.21329e-05	0.000154984	2.2148e-05	1.10839e-05	2.21545e-05	0	1.10585e-05	0	0.000177106	0.000408885	0.000288636	0.000210273	0.000353904	0.000232462
FBti0020145	roo{}1034	0.000255331	0.000336862	0.000228838	0.000200935	0.000361103	0.000681462	0.000183688	0.00019062	0.000228142	0.000228219	0.000347749	0.000255544	0.000170114	0.000156469	0.000166831	0.000326856	0.000182034	0.000228783	0.000326792	0.000244929	0.000275797
FBti0020144	opus{}1033	0.000758103	0.000846852	0.000659908	0.000513026	0.000379299	0.000814539	0.000478998	0.000557349	0.000691352	0.000803131	0.0007257	0.000714104	0.000512513	0.000401005	0.00111496	0.000278742	0.000249284	0.000402559	0.000379016	0.00056814	0.000613259
FBti0020142	hopper{}1031	0	0	0	0.000301948	0.00105711	0.000755231	0	0	0.000150948	0	0	0	0	0	0	0	0	0	0	0.000150802	0
FBti0020141	hopper2{}1030	1.74964e-05	3.49747e-05	3.51068e-05	0.00087515	0.00145315	0.000998147	6.99287e-05	0.000139951	0.00035	0	0	0	3.4971e-05	0	0	0.000139986	0	0.000175492	0.000174948	0.000454558	0.000174989
FBti0020139	hopper2{}1028	0	0.000110876	0.000111295	0.00170162	0.0016466	0.00175795	0.000110844	0.000295782	0.000499305	0	0	7.40177e-05	3.69549e-05	0	0	0.000184908	0.000143797	0.000222537	0.000295796	0.000314071	0.000184916
FBti0020137	S{}1026	0.00263557	0.00215686	0.00237796	0.00235344	0.00332759	0.00375313	0.00141392	0.00201619	0.00152151	0.000955689	0.00159425	0.00139855	0.00236876	0.00258029	0.00175131	0.00132676	0.00108337	0.00117095	0.00111426	0.00100746	0.00122067
FBti0020134	mdg1{}1023	0.00141788	0.000961632	0.00127008	0.00111446	0.00101343	0.00152045	0.000657764	0.000759468	0.000911678	0.000151998	0.000101423	0.000152042	0.000404854	0.00121428	0.00136736	0.00146866	0.00142766	0.000965032	0.000607604	0.000809592	0.000557103
FBti0020136	mdg1{}1025	0.00215326	0.00296941	0.00317205	0.0022904	0.0018001	0.00234605	0.0028596	0.00302503	0.00196287	0.000872678	0.0012829	0.000954772	0.0016616	0.00168845	0.00193539	0.00417066	0.00264983	0.00174967	0.00245285	0.00223331	0.00209905
FBti0020133	Juan{}1022	0	0.000119611	0.000300157	0.000299294	0	0.000179662	0	0.000358967	0.000179546	0.00257436	0.00161791	0.00203614	0.00209297	0.00286969	0.00167557	0.000179527	0.000116344	0.000120034	0.000598308	0.000358743	0.00023938
FBti0020132	412{}1021	0.000400261	0.000330656	0.00045893	0.00040041	0.000559913	0.000555937	0.00183643	0.00167024	0.00176477	0.00200238	0.00222096	0.00181494	0.000551034	0.000497857	0.000449313	0.00013071	0.000150886	0.000221217	0.000147021	0.000187733	0.000273687
FBti0020129	roo{}1018	0.000299794	0.000262605	0.000223043	0.000289797	0.000313473	0.000647298	0.000208675	0.000171768	0.00016172	0.000185366	0.000188906	0.000222505	0.000168318	0.000225495	0.000154964	0.000212235	0.000176838	0.000185825	0.00025598	0.000225514	0.000239196
FBti0020130	G2{}1019	0	0	0	0	0	0	0	0	0	0	0	0	0	0	0	0	0	0	0	0	0
FBti0020131	roo{}1020	0.000252747	0.000343557	0.000233284	0.000296667	0.000384426	0.000839834	0.000161626	0.000168474	0.00021235	0.000182076	0.000296983	0.000313667	0.000229014	0.000178455	0.00013144	0.00022581	0.000226059	0.000111544	0.000293159	0.000215511	0.00023256
FBti0020126	297{}1015	0.000220865	0.00022075	0.000297389	0.00014536	0.000279169	0.000360666	7.54974e-05	9.29824e-05	0.000145335	0.0002268	8.14884e-05	8.14391e-05	0.000185875	0.000185832	0.000186008	0.000168572	0.00010171	0.000110765	0.000145292	0.000209079	0.000127887
FBti0020127	copia{}1016	0.0242278	0.0218132	0.0240269	0.449037	0.439217	0.401456	0.468911	0.464877	0.422562	0.0406626	0.0412102	0.0496005	0.0336059	0.0309065	0.029565	0.0300103	0.0357258	0.0284908	0.0629933	0.0488333	0.0554654
FBti0020128	BS{}1017	0.00048629	0.000486038	0	0.00170265	0.000973215	0.00438034	0.000971788	0	0.000486389	0.000486553	0.00048699	0.000730044	0.000242993	0.000485874	0	0.000486339	0.000472762	0.000243878	0.000729366	0.000485916	0.00024318
FBti0020123	Doc{}1012	0.00281559	0.00343056	0.00322829	0.00464075	0.00367607	0.00385125	0.00372426	0.00443727	0.00352691	0.00461469	0.00439058	0.00418665	0.00381876	0.00350977	0.00388855	0.00299018	0.00381913	0.00321407	0.00323092	0.00312156	0.0032585
FBti0020125	BS{}1014	0.000131537	0.000334649	0.000299922	0.000107662	0.000131623	0.000478726	7.16892e-05	4.78249e-05	0.000239208	4.78577e-05	9.58013e-05	5.38557e-05	5.97524e-05	5.37647e-05	5.97952e-05	5.38162e-05	8.71898e-05	5.997e-05	8.96762e-05	5.97438e-05	4.18588e-05
FBti0020124	jockey{}1013	0.00034735	0.00124981	0.00055757	0.000764456	0.00111225	0.000486705	0.00041648	0.00055568	0.000347421	0.000486553	0.00048699	0.00034764	0.00145796	0.000485874	0.000277906	0.000555816	0.00027015	0.000278718	0.000138927	0.0004165	0.000903239
FBti0020122	X{}1011	0.000181395	0.000498577	0.000389969	1.94424e-05	4.53783e-05	0.000181549	0	3.88647e-05	8.42361e-05	7.77826e-05	1.29754e-05	6.48379e-05	8.41663e-05	2.58914e-05	5.18318e-05	0.000123102	0.00013856	0.000103967	0.0001166	0.000135941	0.000123107
FBti0020120	jockey{}1009	0.000612725	0.000306204	0.000799137	0.000429068	0.000551813	0.000981197	0	0.00049011	0.00049028	0.000613057	0.000429525	0.000613237	0.000612342	0.00116318	0.00067406	0.000551508	5.95681e-05	0.000491658	0.0001838	0.000367353	0.000551532
FBti0020121	roo{}1010	0.000232578	0.00032005	0.000243481	0.000387775	0.000357527	0.000657846	0.000121246	0.000114587	0.000114627	0.000178744	0.000216035	0.000188917	0.000151587	0.000175126	0.000192147	0.000262941	0.000249047	0.000260326	0.000256149	0.000181878	0.000262952
FBti0020119	S{}AGO2[S1008]	0.00127356	0.00282867	0.00209403	0.0014333	0.00215939	0.00210671	0.00130787	0.00148561	0.00162766	0.00122116	0.00129311	0.001133	0.00240411	0.00169663	0.00168055	0.000725296	0.00130692	0.000762894	0.000990456	0.000989788	0.000689946
FBti0020118	opus{}1007	0.0011905	0.00155012	0.0011615	0.000360562	0.000557387	0.000699605	0.00139688	0.00129953	0.00125629	0.00193424	0.0021438	0.00170526	0.00127708	0.000632935	0.00155107	0.000535233	0.000212364	0.000405333	0.00120131	0.00146243	0.00136545
FBti0020117	gypsy5{}1006	0.000307902	0.000307743	0.000176517	0.00106706	0.00108936	0.00138674	0.000131851	0.000263878	0.000142984	0.000220049	0.00051758	0.000770398	0.000923129	0.00060429	0.000494888	0.000252945	0.00035279	0.000430157	0.000549774	0.000373594	0.000362937
FBti0020114	transib2{}1003	0.000684609	0.00140652	0.00114473	0.00146485	0.00159846	0.00201751	0.000285021	0.000798596	0.000190208	0.000437626	0.00039993	0.000399689	0.000342091	0.000437015	0.000228224	0.00209207	0.00221855	0.00217447	0.00211068	0.00174821	0.00150255
FBti0020115	F{}1004	0.000250092	0.000249962	0.000250906	0.000250186	0.000250255	0	0.000249888	0.000500112	0.000250143	0.000500454	0.000250452	0	0.000249936	0.000124939	0	0	0	0	0	0	0
FBti0020116	1360{}1005	0.0001385	0.000166114	8.33708e-05	2.77104e-05	0.000166309	0.000194066	2.76775e-05	0.00013848	0.000166234	0.000138575	0.0001387	0.000110893	0.000193779	0	0.000193918	0.000221623	0.000161577	0.000166702	8.30924e-05	0.00022143	5.54081e-05
FBti0020113	transib2{}1002	0	0	0	0	0	0	0	0	0	0	0	0	0	0	0	0	0	0	0	0	0
FBti0020110	Rt1b{}999	0.000342305	0.00075268	0.000394932	0.000342433	0.000445287	0.000925011	0.000205215	0.000513383	0.000445087	0.000256867	0.000188539	0.000119907	0.000205254	0.000273609	0.000171168	0.000376573	0.000432617	0.000412004	0.000410727	0.000547266	0.000410825
FBti0020111	Doc{}1000	0.00263583	0.00278082	0.00307465	0.00314953	0.00289921	0.00361165	0.00288451	0.00261453	0.00260498	0.00367332	0.00389658	0.00336034	0.0023833	0.00189157	0.0031591	0.00292899	0.00286756	0.00230806	0.00253099	0.00249793	0.00313834
FBti0020112	Stalker2{}1001	3.19544e-05	5.1899e-05	2.00365e-05	5.59411e-05	7.99381e-05	7.99541e-05	0.000462961	0.000331479	0.00035157	0.000499557	0.000500006	0.000435742	1.9959e-05	6.7845e-05	5.59253e-05	0.000239682	0.000275706	0.000256406	0.000239635	0.000183596	0.000195749
FBti0020108	copia{}997	0.0209836	0.0176359	0.0193145	0.452882	0.44189	0.406604	0.461542	0.453659	0.413186	0.0405013	0.0446379	0.0530686	0.0299451	0.02643	0.0260623	0.0317523	0.0369466	0.0321373	0.0666639	0.0508606	0.0579482
FBti0020109	F{}998	0.000358739	0.000723624	0.000412257	0.000489372	0.000737526	0.00161896	0.000351929	0.000319558	0.000482765	0.00031325	0.000398446	0.000554877	0.000299848	0.000215059	0.000254402	0.000887151	0.000741906	0.000883195	0.000750019	0.000775583	0.000711056
FBti0020105	F{}994	0.000462911	0.00113565	0.000802177	0.000477117	0.000715874	0.00148819	0.000637736	0.000462844	0.000596294	0.000273686	0.00037929	0.000329924	0.000378508	0.000273304	0.000196404	0.000568175	0.000736418	0.000302503	0.00035767	0.000644773	0.000448947
FBti0020107	X{}996	0.0002397	0.000349651	0.000311975	3.88848e-05	9.07566e-05	0.000311227	7.76772e-05	9.71618e-05	0.000123114	7.13007e-05	6.48771e-05	2.59352e-05	8.41663e-05	7.76741e-05	4.53528e-05	0.000168455	0.00030861	0.000181942	0.000123078	0.000110048	0.000194379
FBti0020106	roo{}995	0.000501061	7.1543e-05	0	0.000286427	0.000143254	0.000214923	0	7.15698e-05	7.15946e-05	0	0	0.00014328	0.000286141	0.000143038	0	0	0.000417533	0	0.000286293	0.0002861	0
FBti0020103	roo{}992	0.000272433	0.00039606	0.00044725	0.000545069	0.000582395	0.0012022	0.000371196	0.000148578	0.00029726	0.00042126	0.000310028	0.000322234	0.00033414	0.000408299	0.000148613	0.000371536	0.000469514	0.000248413	0.000371464	0.000420708	0.000247701
FBti0020100	roo{}989	0.000201919	0.000340314	0.000254214	0.000249523	0.000427872	0.000447771	0.000166151	0.000170221	0.0002178	0.000170338	0.00017842	0.000213975	0.000182009	0.000102851	0.000150463	0.000265293	0.000257887	0.000206499	0.0002692	0.00025715	0.000190069
FBti0020101	Rt1b{}990	0.00049537	0.000954861	0.000579814	0.000436561	0.000625518	0.0015582	0.000406579	0.000371474	0.000654729	0.000472036	0.000702784	0.000655142	0.000394869	0.000341748	0.000265401	0.000861086	0.000716651	0.000615164	0.000636844	0.000813196	0.000802142
FBti0020099	copia{}988	0.020221	0.0176566	0.018821	0.405307	0.388241	0.367034	0.415003	0.420572	0.381625	0.0407896	0.0416515	0.051475	0.0320704	0.0257183	0.0262413	0.0325785	0.0373647	0.0322915	0.0686343	0.0545894	0.0584832
FBti0020098	Rt1b{}987	0.000385101	0.000994822	0.000701383	0.000308196	0.000782562	0.00155358	0.000473584	0.000462055	0.000574806	0.000503866	0.000486519	0.000622605	0.000426307	0.000479484	0.000278483	0.000876933	0.000679659	0.000659617	0.000716813	0.00079921	0.000527368
FBti0020097	jockey{}986	0.000540885	0.000720806	0.000862668	0.00110992	0.0010686	0.00131866	0.000692877	0.000540807	0.000693583	0.00156803	0.00247221	0.00183221	0.00141374	0.00162127	0.00177537	0.00155347	0.00225167	0.00171101	0.00184438	0.00146897	0.00183095
FBti0020096	pogo{}985	0.000420013	0.000469183	0.000768401	0.00185369	0.00153281	0.00168149	0.00276489	0.00296438	0.00259473	0.00454848	0.00529484	0.00536582	0.00358023	0.00367814	0.00306391	0.00852465	0.00847884	0.00768216	0.00600316	0.00498691	0.00597987
FBti0020094	412{}CG33267[iso-1]	0.000546498	0.000679734	0.000548278	0.000676291	0.00067648	0.000846781	0.00185658	0.00166759	0.00170056	0.0018591	0.00197022	0.00189206	0.000865759	0.000732085	0.000578936	0.000133602	0.000169227	0.000263922	0.000190244	0.000230566	0.000198387
FBti0020095	Doc{}984	0.00206844	0.00187883	0.00164448	0.00271991	0.00244079	0.00346986	0.00176779	0.00189254	0.00186718	0.00211511	0.0030029	0.00237613	0.00232066	0.00150776	0.00212717	0.00214671	0.00175163	0.00182023	0.00178207	0.00163138	0.00188658
FBti0020093	roo{}982	0.000336625	0.00030617	0.000347853	0.000424307	0.000394109	0.000646872	0.000188357	0.000316382	0.000191915	0.000121251	0.000252832	0.000272894	0.000228762	0.000191712	0.000181794	0.000350125	0.000304353	0.000202584	0.000259177	0.000235457	0.000205371
FBti0020092	jockey{}981	0.000685156	0.000753281	0.000952523	0.00101833	0.00115573	0.00128331	0.000577018	0.000401248	0.000636346	0.00142981	0.00235249	0.00164575	0.00169226	0.00162341	0.00185988	0.00200673	0.00266439	0.00221875	0.00209442	0.00156487	0.00208513
FBti0020091	Rt1a{}980	0.000196386	0.000490711	0.000623915	6.54866e-05	0.000589544	0.000491384	0	6.54527e-05	0.000163689	6.54975e-05	0.000163891	6.55167e-05	0	0	0.000130936	9.8203e-05	9.54616e-05	0.000196978	0	6.54118e-05	6.54715e-05
FBti0020090	17.6{}979	0.00139074	0.00154989	0.00171623	0.00283586	0.0028989	0.00312627	0.00164711	0.00199029	0.00168878	0.00110252	0.00181546	0.00118289	0.00107016	0.00081686	0.00103537	0.002013	0.00167603	0.00192082	0.00268792	0.00281486	0.0027641
FBti0020089	X{}978	0.000408979	0.000445928	0.000167855	9.29846e-05	7.44084e-05	0.000316299	3.71496e-05	7.43492e-05	0.000204531	0.0001302	7.44669e-05	7.44219e-05	0.000148627	0.000111444	3.71834e-05	0.000148735	0.000234947	0.000354274	7.43529e-05	0.000241484	0.000371853
FBti0020088	S{}977	0.00192581	0.00164227	0.00175483	0.00155536	0.00157348	0.00259941	0.00107687	0.00123658	0.00114865	0.00180311	0.00191089	0.00182132	0.00183632	0.00150049	0.00181997	0.00181998	0.00231883	0.0024987	0.00196096	0.00144766	0.00208512
FBti0020087	Doc{}976	0.00139558	0.00191294	0.00161348	0.0021008	0.00231418	0.00292656	0.00152725	0.00158143	0.00183456	0.00216764	0.00260883	0.00204856	0.00207213	0.00169982	0.00206033	0.00228632	0.00206744	0.00215967	0.00179415	0.00152732	0.00203385
FBti0020086	17.6{}975	0.00147439	0.00197433	0.00205942	0.00318212	0.00373728	0.00348937	0.00203479	0.00199136	0.00199612	0.00145481	0.00203122	0.0013574	0.00107864	0.000765048	0.00100202	0.00223217	0.00175806	0.00225501	0.00319692	0.0033779	0.00340542
FBti0020085	roo{}974	0.000295086	0.000389733	0.000271377	0.000263568	0.000439403	0.00077702	0.000164973	0.000168597	0.00022136	0.000189801	0.000253295	0.000221499	0.000291391	0.000193046	0.000158096	0.000249443	0.000303954	0.000236076	0.000245882	0.000266777	0.000252967
FBti0020080	roo{}969	0.00114528	0.00121623	0.000646319	0.000286427	0.000429761	0.000501488	0.000143043	0	0.000429568	0	0.000430099	0.000286559	0.000715353	0.000286075	0.000572693	0.000644285	0.000139178	0.000287184	0.00042944	0.000357625	0.000572723
FBti0020082	412{}971	0.00063698	0.000812136	0.000729177	0.000608625	0.000670082	0.00077647	0.0025132	0.00242099	0.00242592	0.00256155	0.00259248	0.00245197	0.000926307	0.000771065	0.000751378	0.000318522	0.000258025	0.000225253	0.000306211	0.000334565	0.0003022
FBti0020084	jockey{}973	0.000782567	0.000782161	0.000711511	0.000819556	0.000917669	0.00108918	0.000445944	0.000372889	0.000458629	0.00117448	0.00131024	0.00115035	0.00117923	0.000977371	0.00110059	0.00138797	0.00159886	0.00127551	0.00119208	0.00118517	0.00141861
FBti0020083	jockey{}972	0	0.000695918	0	0	0	0.000232291	0.000231904	0	0	0.000232218	0	0.00034843	0.000579869	0	0.000232114	0.000232116	0.000451273	0.000232793	0	0	0.000580316
FBti0020081	Doc{}970	0.00200212	0.0019067	0.00145911	0.00277757	0.00247594	0.00223068	0.00198162	0.0017941	0.00175694	0.00270244	0.00261029	0.00264652	0.00247277	0.00192492	0.00262567	0.00173787	0.00211169	0.00214077	0.00224746	0.00171748	0.00217243
FBti0020077	Doc{}966	0.00128761	0.00170853	0.0015368	0.00228748	0.00214372	0.00264408	0.00206294	0.00208652	0.00154323	0.00221011	0.00266786	0.00277734	0.00169725	0.00168577	0.00236454	0.00192051	0.00209352	0.00189271	0.00192014	0.00149736	0.00193169
FBti0020079	Cr1a{}968	0	0	0	0	0	0	0	0	0	0	0	0	0	0	0	0	0	0	0	0	0
FBti0020078	S{}967	0.00162733	0.00233366	0.00205853	0.0021234	0.00240719	0.00240767	0.00197948	0.00160941	0.00212304	0.00106188	0.00136397	0.000637313	0.00159096	0.00127247	0.00134444	0.000937578	0.000877013	0.000975794	0.000725155	0.000530243	0.000477655
FBti0020076	roo{}965	0.000234837	0.000453518	0.000311473	0.000286688	0.000505826	0.000569666	0.000194875	0.000230824	0.00018313	0.000139385	0.000267063	0.000203164	0.000202868	0.000194867	0.000163207	0.000246803	0.000274739	0.000123761	0.000282574	0.00025852	0.000191081
FBti0020075	jockey{}964	0.000253612	0.000811136	0.000865087	0.000456672	0.000203022	0.00111684	0.000456129	0.000253575	0.000355128	0.000355248	0.0011175	0.000203058	0.000405525	0.000506789	0.000710177	0.000710183	0.000690358	0.000864879	0.00040574	0.000354783	0.000710214
FBti0020072	412{}teq[iso-1]	0.000877889	0.00111414	0.00112654	0.000968081	0.00103781	0.000960371	0.00303951	0.00273535	0.00284249	0.00290473	0.00248207	0.0029914	0.00140374	0.00135446	0.00101681	0.000204181	0.000166724	0.000192489	0.000224555	0.000216243	0.000138849
FBti0020074	H{}963	0.00128559	0.00163338	0.00183629	0.00187461	0.00178792	0.00250795	0.00200302	0.00237473	0.0022012	0.000981065	0.00106923	0.00100316	0.0021776	0.00176345	0.00185229	0.000283294	0.000148285	0.000349686	0.000370389	0	8.71712e-05
FBti0020073	412{}962	0.000735138	0.000676967	0.000687811	0.00075194	0.000677761	0.00085977	0.00212109	0.00188301	0.00195801	0.00184297	0.00233267	0.00199232	0.00108138	0.000949085	0.000826074	0.000148695	0.000184695	0.000215407	0.000132147	0.000222848	0.00021479
FBti0020071	I{}960	0.00274192	0.00292358	0.00271065	0.00443224	0.00370029	0.00336301	0.00182455	0.00235806	0.00242758	0.0010252	0.000768156	0.000790608	0.00285462	0.00206469	0.00373256	0.000784303	0.000706759	0.000666017	0.000635334	0.000806501	0.000761436
FBti0020070	blood{}959	0.00150907	0.00182235	0.00201589	0.00116635	0.0012246	0.00116691	0.00229688	0.00256299	0.00239847	0.00385125	0.00324193	0.00399307	0.00380545	0.00433333	0.002576	0.00140585	0.00185698	0.00125237	0.000934298	0.00123938	0.00115781
FBti0020069	roo{}958	0.000309695	0.000380189	0.000297195	0.000360324	0.00043453	0.000744576	0.000154721	0.000158191	0.000127944	0.000178508	0.000155071	0.000205513	0.000255675	0.000272433	0.000171695	0.000191896	0.000271627	0.000226219	0.000208688	0.000178274	0.000239038
FBti0020068	Rt1a{}957	0.000349081	0.000597269	0.000308666	7.1026e-05	0.000236819	0.000438203	0.000100501	9.46524e-05	0.000360987	8.87973e-05	0.000159979	0.000201333	9.46067e-05	0.000124143	0.000130178	0.00010651	9.20326e-05	0.000189903	8.8741e-05	5.32087e-05	5.91747e-05
FBti0020062	Stalker{}951	9.95897e-05	0.000311056	7.49355e-05	0.000410961	0.000298964	0.000573129	0.000248771	0.000273832	0.000273927	0.000161921	0.000286732	0.0002741	0.000298582	9.95044e-05	0.000124499	0.000336149	0.000593018	0.000511936	0.000659719	0.000447809	0.000485569
FBti0020063	roo{}952	0.000356314	0.000369568	0.000306888	0.000369898	0.000383456	0.000693049	0.000201523	0.000191575	0.000161383	0.000245519	0.000259204	0.000174941	0.000214998	0.000147777	0.000235323	0.000201707	0.000294115	0.000347273	0.000329391	0.000181379	0.000194992
FBti0020066	NOF{}nmo-FB-NOF	0.000498151	0.000684602	0.000749659	0	0.000249238	0.000436254	0	0	0	0.000124605	0	0.000124642	0.00018669	0	6.22746e-05	0.0002491	0.000121073	0.000124913	6.2263e-05	0	0
FBti0020064	FB{}nmo[FB]	0.000459679	0.00128373	0.000800276	0.000405751	0.000500566	0.00178616	0.000472814	0.000270361	0.000243409	0.000243491	0.000460341	0.000230031	0.00027023	0.000297185	0.000216339	0.000851844	0.00130124	0.000772962	0.00112205	0.000891633	0.000973578
FBti0020061	297{}950	0.000267164	0.000214496	0.000259246	0.000227832	0.00023666	0.000460265	0.000105028	9.19613e-05	0.000232173	0.00016652	0.000140353	0.00021917	0.000280128	0.000201296	0.000166445	0.000227769	0.000195864	0.00019329	0.000140138	0.000170678	0.000109509
FBti0020060	F{}949	0.000839974	0.00109986	0.000908036	0.000644873	0.000847038	0.00209847	0.000507478	0.000598966	0.000514508	0.000358322	0.000397769	0.000514832	0.000312353	0.000299269	0.000182337	0.000748889	0.000626699	0.00073801	0.000709679	0.000611604	0.000644724
FBti0020059	297{}948	0.000311589	0.000261198	0.000312604	0.000221211	0.000191099	0.000251496	8.03446e-05	4.01993e-05	0.000140746	0.000291644	0.000100657	0.000321909	0.000281259	0.000230981	0.000170887	0.000201046	4.88583e-05	0.000181468	0.000180906	8.03483e-05	0.000120633
FBti0020058	Quasimodo{}947	0.000442401	0.00176869	0.00122056	0.0026554	0.00210278	0.00110695	0.00033153	0.00099526	0.000331868	0.00044264	0.000221519	0.000332078	0.000552655	0.000221011	0.0011061	0.00962319	0.00806427	0.00754349	0.00818365	0.0124882	0.0136058
FBti0020057	BS{}946	0	0	0	0	0	0	0	0	0	0	0	0	0	0	0	0	0	0.000243878	0	0	0
FBti0020056	BS{}945	0.000339147	0.000621447	0.000453668	0.000678548	0.00039593	0.000905163	0	0.000678197	0.000395752	0.00022622	0.000113212	0.000113143	0.000225956	0.000112952	0.000226119	0	0.000164856	0.000623644	0.000169557	0.000282405	0
FBti0020054	Doc{}943	0.00167284	0.00182102	0.0016913	0.00259452	0.0024006	0.00306948	0.00178161	0.00198378	0.001751	0.0024133	0.00264273	0.00263465	0.00208002	0.0019111	0.00227605	0.00183512	0.00221253	0.0017169	0.00197091	0.00166507	0.00232804
FBti0020055	roo{}944	0.000346173	0.00035835	0.000235668	0.000255604	0.000296913	0.000560948	0.000140003	0.000177182	0.000234951	0.00013607	0.000239368	0.000230974	0.000325363	0.000214114	7.83081e-05	0.000210197	0.000200323	0.000136406	0.000197794	0.00014001	0.00024318
FBti0020053	Doc{}942	0.00106889	0.000691276	0.00127738	0.00168256	0.00179313	0.00220253	0.00133502	0.000990153	0.000628887	0.00176148	0.00174732	0.00143162	0.00152379	0.00116221	0.00152488	0.000817468	0.00146704	0.0015924	0.00138314	0.000832465	0.0010376
FBti0020052	Rt1b{}941	0.000419675	0.00151005	0.000421042	0.000419832	0.00117586	0.00109209	8.38666e-05	0	0.00109138	0.000335921	0.000336223	0.00033602	0.000167765	0.000167726	0	0.000755491	0.000571201	0.000673505	0.000251781	0.000754834	0.000335788
FBti0020047	roo{}936	0.000229081	0.000316507	0.000331222	0.000289829	0.000401154	0.000536103	0.000164939	0.000235785	0.000195433	0.000235947	0.000205795	0.000266361	0.000225571	0.000168298	0.000111182	0.000185305	0.000209608	0.000165571	0.000266114	0.000276033	0.000239222
FBti0020048	297{}937	0.000222002	0.000369811	0.000371208	0.000592227	0.000370245	0.000444382	0.000147881	0.00022197	0.000296063	0.000148081	0.000666964	0.000370312	0.000295817	0.000443624	0.000222022	0.000148016	0.000143884	0.000222671	7.39937e-05	0.000147888	0.000148023
FBti0020043	pogo{}932	0.00247067	0.00263401	0.00165248	0.00131818	0.000659275	0.000989109	0.00131662	0.00148219	0.00164745	0.0013184	0.00214433	0.00230788	0.0019753	0.00213941	0.00148254	0.000164728	0.000160129	0.000330416	0.000329391	0	0.00115314
FBti0020046	Doc{}935	0.00172786	0.00208564	0.00184016	0.00260606	0.00243388	0.00268712	0.00199206	0.00167445	0.00160857	0.00304534	0.00279517	0.0028733	0.00231123	0.00203182	0.00251227	0.002499	0.00262306	0.00189304	0.00221943	0.00225777	0.00233959
FBti0020045	jockey{}934	0.000684741	0.000814184	0.000840947	0.000578705	0.000862392	0.00113433	0.000401073	0.000436755	0.00034244	0.000507927	0.000543852	0.000378104	0.000743305	0.000577993	0.000814681	0.000625775	0.00086081	0.000686806	0.000779115	0.000471872	0.000802915
FBti0020044	BS{}933	0	0	0	0	0	0	0	0	0	0	0	0	0	0	0	0	0	0	0	0	0
FBti0020042	jockey{}931	0.000111001	0.000443774	0.000222725	0.000111043	0.000444294	0.000222191	0.000110911	0	0.000444094	0.000777427	0.000222321	0	0.000443726	0	0.000333033	0.000222024	0.00032374	0.000111336	0.000443962	0	0.000444068
FBti0020041	Quasimodo{}930	0.000635228	0.000846532	0.000903879	0.000718534	0.00114665	0.00151671	0.00066375	0.000904967	0.000710105	0.000369712	0.00035757	0.000249317	0.000456414	0.000647129	0.000431829	0.000726641	0.000928355	0.000645472	0.000714046	0.000643037	0.000685148
FBti0020040	I{}929	0.00201997	0.00308848	0.00265382	0.00384901	0.00350117	0.00237068	0.00168194	0.0023563	0.00250143	0.000950382	0.000614089	0.000577617	0.00279976	0.0016218	0.00312644	0.000901864	0.000677973	0.000518576	0.000973824	0.000468562	0.000913929
FBti0019677	hopper{}205	0	0	5.82122e-05	0.00011609	0.000174183	0.000116145	0.000115952	0	0.00011607	0	0	5.80717e-05	0	5.79736e-05	0	5.8029e-05	0.000169227	0.000349189	0	5.79786e-05	0.000116063
FBti0019679	1731{}207	0.0010836	0.00127995	0.00375553	0.000591275	0.00108431	0.000492964	0.001378	0.00108344	0.000492645	0.00157699	0.00374873	0.00167605	0.000393789	0.00216534	0.000985179	0	0.00134076	0.000790447	0.00305349	0.000787465	0.000689661
FBti0019678	Ivk{}206	0.00129505	0.00176196	0.00143664	0.00109579	0.00133015	0.00204987	0.052233	0.0490623	0.0480351	0.00217481	0.00252527	0.00258656	0.000883734	0.000524418	0.000764551	0.0012153	0.00105381	0.00115018	0.00216202	0.00156199	0.0015463
FBti0019662	1360{}190	0	0	0	0	0	0	0	0	0	0.000107932	0	0.000107964	0	0.000107782	0.000107884	0	0	0	0	0	0
FBti0019663	Rt1c{}191	0	0	0	0	0	0	0	0	0	0	0	0	0	0	0	0	0	0	0	0	0
FBti0019664	Rt1c{}192	0.000132243	4.40581e-05	0.000176898	0	0	0.000352948	0	0	0	0	0	0	0.000176214	0	0	0	0	0	0	0	0
FBti0019667	S{}195	0	9.18153e-05	0	0	0	0.000137912	0	0	9.18816e-05	0	4.59975e-05	4.59698e-05	0	4.58921e-05	0	0	0	0	0	0	4.5938e-05
FBti0019668	R1A1{}196	0	3.71832e-05	0.000149295	0	0	0.000111703	0	0	3.72101e-05	0	0	0	0	0	0	0	3.61676e-05	0	0	1.8587e-05	0
FBti0019671	R1A1{}199	3.72025e-05	0.000167325	3.73237e-05	0	0	7.44685e-05	0	0	1.8605e-05	0	0	0	3.71792e-05	0	0	0	0	0	0	3.71739e-05	3.72078e-05
FBti0019675	FB{}203	0.000173086	0.000172997	2.89417e-05	0.000230868	0.000173199	0.000404212	0.000317066	0.000144218	8.65608e-05	0.000288633	0.000231114	0.000173231	0.000144148	0.000317053	0.000346204	0.000721265	0.000308498	0.000260412	0.00034614	0.000403557	0.000548185
FBti0019673	mariner2{}201	0	0.000102638	6.86839e-05	0.000136973	0.000102758	0.000205558	0.000307823	0.000342256	0	0.000102747	0.000171399	0.000137036	0.000102627	0.000239408	6.84672e-05	0.000102702	9.98348e-05	6.86674e-05	0.000171136	6.84083e-05	0
FBti0019672	Rt1c{}200	0	0.00016574	4.15914e-05	0	0	0	0	0	4.14648e-05	0	0	0	0	0	0	0	0	0	0	0	0
FBti0019670	mariner2{}198	3.42305e-05	0.000102638	0.000137368	0.00010273	6.85056e-05	0.000205558	0.000307823	3.42256e-05	0	6.84979e-05	6.85595e-05	0	6.84181e-05	0.000171006	0	6.84678e-05	0.00019967	3.43337e-05	0.000136909	0.000205225	3.42354e-05
FBti0019669	Rt1c{}197	0	0.00016574	0.000124774	0	0	0.000124475	0	0	4.14648e-05	0	0	0	0	0	0	0	0	0	0	0	4.14623e-05
FBti0019666	jockey{}194	0.00141151	0.00112221	0.000933346	0.00125158	0.000898823	0.00157325	0.000833397	0.00118678	0.000898419	0.00080243	0.000963781	0.000834772	0.00150681	0.0019552	0.00211747	0.000577495	0.000405437	0.000611355	0.000673614	0.000224386	0.000545436
FBti0019665	roo{}193	0	0.000500801	0.000574505	0.000286427	0.000787895	0.000573129	0.00042913	0	0.000214784	0.000429713	0.000430099	0.000214919	0.000143071	0.000286075	0.000143173	0.000644285	0.0006263	0.000861551	0.000143147	0.000500675	0
FBti0019661	Quasimodo{}189	0.000192278	0.000576535	0.000128603	0.000256466	0.000513076	0.000833914	0.000448283	0.000384501	0.000384634	0.000513018	0.00012837	0.000192438	0.000448368	0.000256151	0	0.000320495	0.000373858	0.000257143	0.000128173	0.000448303	0.000448713
FBti0019660	I{}188	0.00258962	0.00302726	0.00294141	0.0046391	0.00395546	0.00342533	0.0018295	0.00227558	0.00243611	0.00114713	0.000873971	0.000627965	0.0026051	0.00207448	0.00338279	0.000513413	0.000565625	0.000675103	0.000815597	0.00076945	0.000998346
FBti0019659	H{}187	0.00161244	0.00222139	0.00142094	0.00213619	0.00218039	0.00209359	0.00217719	0.00254903	0.00239735	0.000850256	0.00141837	0.00130847	0.00176386	0.00174168	0.002092	8.71674e-05	0.000254202	0.000218554	0.000217876	0.000130637	0.000108964
FBti0019658	roo{}186	0.000328898	0.000442362	0.000329969	0.000296526	0.000373807	0.000698997	0.000219087	0.000186755	0.000239617	0.000190945	0.000215515	0.000219449	0.00021507	0.000146052	0.000178677	0.000247714	0.000217114	0.0001344	0.000308567	0.000247498	0.000239602
FBti0019654	H{}182	0.00154707	0.00132848	0.00131164	0.0020054	0.00211498	0.00246433	0.00191593	0.00200436	0.00189609	0.000436029	0.000807378	0.0011122	0.0020034	0.00189408	0.00154721	6.53755e-05	0.00042367	0.00028412	0.000196089	8.70917e-05	0.000305099
FBti0019655	3S18{}183	2.18831e-05	8.74868e-05	8.78172e-05	0	0	8.76068e-05	4.37304e-05	0	0	0	0	0	0	0	0	0	4.25486e-05	0	0	0	0
FBti0019657	transib2{}185	0.000523518	0.000795335	0.000735312	0.000712251	0.000963902	0.00148806	0.000397549	0.000397817	0.000188505	0.000293329	0.000335534	0.000356289	0.000125566	0.000209228	0.000230369	0.0017592	0.0011197	0.00126023	0.000921305	0.00138102	0.000858692
FBti0019656	Rt1b{}184	0.000138626	0.000166265	0.000111262	8.32065e-05	0.000138716	0.000693719	8.31076e-05	5.54423e-05	2.77308e-05	2.77401e-05	2.7765e-05	0	8.31234e-05	2.77014e-05	0.000110911	8.31837e-05	2.69539e-05	5.56175e-05	5.5445e-05	2.77038e-05	5.54582e-05
FBti0019741	Rt1c{}269	0.000106896	0.000128208	8.57949e-05	0	0	0.000299563	0	0	4.27669e-05	0	0	0	0	2.13608e-05	0	0	4.15688e-05	4.28872e-05	0	0	0
FBti0019744	297{}272	0.000408484	0	0.000273209	0.000136212	0.0002725	0.000272555	0.000272101	0.000272283	0.000136189	6.81174e-05	0.000204536	0	0	0	0	0.00027235	0.000132373	6.82859e-05	6.80742e-05	0	6.80904e-05
FBti0019747	F{}275	0.000437288	0.000978496	0.000759561	0.000470097	0.000633502	0.00163306	0.00057388	0.000574266	0.000541825	0.000522417	0.000588247	0.000287414	0.000267427	0.000339097	0.000267619	0.000548297	0.000558371	0.000569534	0.000456825	0.000417387	0.000528737
FBti0019748	HB{}276	0.00037005	0.000175196	0.000449414	0.00064296	0.000545693	0.000487323	0.000155684	0.000486839	0.000740251	0.000798961	0.00115076	0.000409344	0.000583924	0.000214056	0.000292172	0.000623305	0.000738447	0.000937683	0.000467388	0.000622763	0.000740207
FBti0019746	mariner2{}274	5.7587e-05	0.000172671	0	0.000115217	0.000230498	0.00028818	0.0002877	0.000172736	0.000115197	0.000115236	0	0.000172905	0	0	0.000115185	0.000115185	5.5985e-05	5.77606e-05	0.000172745	0	0.00011519
FBti0019745	297{}273	0.000303142	0.00027458	0.000237601	0.000161104	0.000161149	0.000426657	3.78619e-05	4.73591e-05	0.000123176	0.000208523	0.000104355	0.000208584	0.000217747	0.000132511	0.000142111	0.000180008	0.000138145	0.000104519	0.000132612	0.000132523	6.63218e-05
FBti0019743	X{}271	8.28007e-05	4.13789e-05	4.15352e-05	0	0	0.000165743	0	0	4.14088e-05	0	0	0	8.27489e-05	4.13649e-05	0	0	0	0	0	0	0
FBti0019742	Helena{}270	2.62522e-05	7.87157e-05	0	5.2524e-05	5.25386e-05	0	0	0	0	0	7.88698e-05	0	0	0	0	0	0	5.26626e-05	0	0	0
FBti0019740	Rt1b{}268	0.000110441	0.000209729	0.000177281	1.10482e-05	0.000121564	0.000143695	3.31052e-05	2.2085e-05	0.000132556	0	4.42399e-05	4.42132e-05	0	1.10346e-05	3.31353e-05	2.20904e-05	3.22106e-05	5.53869e-05	0.000176689	2.20712e-05	0.000110457
FBti0019718	hopper{}246	0.000192681	0.000299571	0.000257745	0.00021417	0.000128538	0.000449972	0	0.000171247	6.42401e-05	0.000171365	0	8.57074e-05	0.000106978	6.4172e-05	4.28219e-05	0.000171289	0.000291388	0.000257683	0.000192663	0.000492028	0.000214121
FBti0019720	HB{}248	0.00408344	0.00299297	0.00359252	0.00406402	0.0043166	0.00314379	0.00410104	0.00404098	0.00397955	0.00469326	0.00461359	0.00402397	0.00418552	0.00322211	0.00360213	0.00408385	0.00456023	0.00428479	0.00458559	0.00334794	0.00444007
FBti0019721	S2{}249	4.85519e-05	0.00014558	4.871e-05	4.85701e-05	0.000194335	0.000194373	9.70247e-05	0	0.000194247	4.85782e-05	0.000340353	4.85924e-05	9.70431e-05	0.000145531	0	4.85568e-05	9.44026e-05	4.86983e-05	0.000339832	9.70292e-05	0.000194236
FBti0019726	NOF{}CG17600-FB-NOF	0	0	0	0	0	0	0.000252986	0	0	0	0	0	0	0	0	0.000253218	0	0	0	0	0
FBti0019729	Juan{}257	0.000151915	0.000375976	0.000355624	0.00024605	0.000304029	0.000427174	0.00023853	0.000289321	0.000267715	0.00312681	0.00312237	0.00317116	0.00311593	0.00258035	0.00261174	0.000614957	0.000801743	0.0004934	0.000672705	0.000802364	0.000926093
FBti0019731	transib2{}259	2.83145e-05	0	0	0.0001133	5.66659e-05	8.50159e-05	0	0.000169863	0	5.66596e-05	2.83552e-05	0	0	0	0	2.83173e-05	5.50537e-05	0	2.83118e-05	0	8.49556e-05
FBti0019732	S{}260	0.000495847	0.000584088	0.000568528	0.00341908	0.00568824	0.00654013	0.00028311	0.000424951	0.00051366	0.000124029	0.000354686	0.000602603	0.000318559	0.000406954	0.000106263	0.000478186	0.000430405	0.000444056	0.000566629	0.000389295	0.000371939
FBti0019733	jockey{}261	0.000738003	0.000792485	0.000856668	0.00137893	0.00112298	0.00139791	0.00047535	0.000561046	0.000585642	0.00103132	0.00141705	0.00136736	0.00107888	0.00137724	0.00167743	0.00167135	0.00164841	0.00193316	0.00158564	0.00132251	0.00182392
FBti0019734	297{}262	0.000200237	0.000100067	0.000100445	0	0.000100184	0.000300612	0	0	0	0	0.000300788	0.000100202	0.000100056	0	0	0.000400514	0	0	0.000300327	0.000100042	0.000600797
FBti0019735	297{}263	0.00030582	0.000251431	0.000247432	0.000187508	0.00021224	0.000306081	0.000113357	0.000128229	0.000217078	0.000167798	0.000113613	0.000217215	0.000167603	0.000182349	0.000167723	0.000231855	0.000230178	0.000183056	0.00016276	0.000207009	0.000118399
FBti0019737	HMS-Beagle2{}265	0.000182014	0.000698737	0.000290511	0.000144838	0.000149018	0.000757658	6.6133e-05	0.000140627	0.000140676	0.000136584	0.000575826	0.000235988	0.000128157	9.50623e-05	6.20559e-05	0.000235815	0.000168908	0.00019501	0.000153043	0.000173607	0.000281335
FBti0019739	invader5{}267	3.31831e-05	6.63317e-05	4.16139e-05	8.29887e-06	2.49035e-05	0.00011624	0	3.31783e-05	1.65949e-05	0	1.66154e-05	0	0	0	0	8.2966e-06	3.226e-05	8.32078e-06	2.4885e-05	8.28939e-06	0
FBti0019738	Juan{}266	0.000239006	0.000260599	0.000290648	0.000173888	0.000333378	0.000427679	0.000231575	0.000152073	0.000289764	0.00315224	0.00336541	0.00314592	0.00321371	0.00276431	0.00254964	0.000680874	0.00067595	0.000552099	0.000564871	0.00106385	0.00108655
FBti0019736	Tc1{}264	0	0	0	0	0	0	0	0	0	0	0	0	0	0	0	0	0	0	0	0	0
FBti0019724	mariner2{}252	0.00016449	0	8.25128e-05	0.000123414	0.000123448	8.23151e-05	8.2178e-05	0.00012335	0.000123393	8.22895e-05	0	0.00012347	0	0.000246524	0.000123379	0.00012338	3.99786e-05	0.00012374	0.000164475	4.10909e-05	0.000123385
FBti0019723	transib4{}251	0	0	0	0	0.000182478	0	0	0	0.000121597	0	0.000121747	0	6.07482e-05	0	0	0	0	0	0.000121561	6.07395e-05	0.00036477
FBti0019722	FB{}250	0.000249075	0.000622366	0.000562245	0.000249169	0.000436166	0.00137108	0.000248872	0.00037356	0.000435971	0.000124605	0.000436509	0.000560887	0.000373379	0.000684371	6.22746e-05	0.000685026	0.000242147	0.000312283	0.000498104	0.00174219	0.000622778
FBti0019715	rover{}243	0.00171971	0.00292835	0.00155684	0.000532903	0.00162233	0.00213843	0.000370275	0.000602101	0.000868716	0.000515612	0.000458089	0.000243394	0.000474504	0.000329762	0.000312703	0.000573293	0.000664244	0.000859543	0.000457388	0.000462865	0.000376421
FBti0019122	jockey{}307	0.00110859	0.00104068	0.00121666	0.00113964	0.00134221	0.00127505	0.00064258	0.000465418	0.000532966	0.00121949	0.00164381	0.00123824	0.00129765	0.00123615	0.00165385	0.00209489	0.00169106	0.00197813	0.00178827	0.0014627	0.0018377
FBti0019121	opus{}306	0.000797756	0.0008665	0.000910607	0.000427529	0.000362483	0.000606974	0.000622231	0.000761015	0.000675788	0.00111176	0.00103939	0.000810642	0.000492184	0.000650672	0.000691995	0.000435553	0.000296772	0.000371503	0.000655238	0.000618192	0.000806012
FBti0019120	mdg1{}305	0.00110779	0.001186	0.00122378	0.00162702	0.00124967	0.00137034	0.00152559	0.0016884	0.0014898	0.000792889	0.000797756	0.000834646	0.000887332	0.00101564	0.000875521	0.00335273	0.00234352	0.0021307	0.00124458	0.0018366	0.001581
FBti0019119	Burdock{}304	0.000321235	0.000618353	0.000381962	0.000452277	0.000726226	0.000654925	0.000368524	0.000297397	0.0005593	0.000821377	0.00128679	0.000976416	0.00193809	0.00185443	0.00163012	0.000142785	0.000138799	0.000167068	0.000130861	0.000130773	0.000309381
FBti0019118	Juan{}303	0.00024509	0.000222694	0.000290595	0.00028976	0.00024525	0.000323349	0.000200365	0.000311888	0.000189426	0.00650955	0.00518777	0.00606547	0.00689163	0.0063001	0.00518079	0.000557079	0.000422392	0.000346396	0.000623807	0.000834892	0.000479109
FBti0019117	copia{}302	0.0215139	0.0197708	0.0202219	0.477741	0.460714	0.422253	0.491477	0.482864	0.442354	0.0455533	0.0479258	0.0562581	0.0344852	0.0300567	0.0289419	0.0359156	0.0413619	0.0358113	0.0722757	0.0550553	0.0613647
FBti0019115	springer{}300	0.000779165	0.00075022	0.000663014	0.000808023	0.000902135	0.00112687	0.0109116	0.0118204	0.0110574	0.0154244	0.01677	0.0158903	0.00364062	0.00302432	0.00340661	0.00669088	0.00689276	0.00631758	0.00712604	0.00698263	0.00676461
FBti0019116	pogo{}301	0.00263538	0.00148163	0.00297446	0.0018125	0.00115373	0.00181337	0.00115204	0.00065875	0.00164745	0.0021424	0.00296907	0.00181333	0.00345677	0.0016457	0.00181199	0.000494183	0.0011209	0.000826039	0.000329391	0.000822922	0.00115314
FBti0019114	mdg1{}299	0.0011927	0.00120455	0.00147176	0.00167956	0.00146378	0.00155558	0.0016568	0.0018075	0.00152547	0.000964658	0.000903098	0.000723706	0.00148683	0.00133701	0.00132997	0.00293426	0.00218168	0.00210082	0.00134218	0.00159043	0.00160435
FBti0019113	copia{}298	0.0224011	0.020735	0.0221574	0.481601	0.482582	0.436205	0.500877	0.49916	0.453723	0.0438553	0.0463276	0.0552628	0.0322357	0.0278197	0.0267802	0.0348854	0.0404299	0.03522	0.0740322	0.0566439	0.0586669
FBti0019112	pogo{}297	0.000635248	0.000360749	0.000506956	0.00135763	0.00167584	0.00197962	0.00191862	0.00271385	0.0028592	0.00535919	0.0040483	0.00472499	0.00300111	0.0033322	0.00242571	0.00577556	0.00811271	0.00553174	0.00470617	0.00464528	0.00411526
FBti0019749	297{}294	0.000254835	0.000275079	0.000132946	0.00014786	0.000122401	0.000234648	0.000112036	9.17275e-05	0.000101955	0.000142785	0.000173537	0.000209139	0.000295424	0.000137493	0.000142721	0.000152916	0.000123873	0.000102241	0.000173272	0.000112041	0.000117241
FBti0019111	I{}295	0.00261656	0.00284035	0.00311185	0.00388297	0.00296506	0.0023413	0.00131587	0.00211374	0.00169851	0.000589477	0.00104119	0.000554965	0.00245907	0.00186984	0.00259947	0.000554558	0.00057277	0.000712599	0.000537124	0.000761855	0.00100518
FBti0019750	297{}296	0.000277103	0.000258182	0.000188478	0.00011746	0.000183289	0.000413658	8.91637e-05	4.69598e-05	9.39522e-05	0.000112781	0.000117585	0.000188023	0.000145505	0.000122008	0.000150307	0.000197279	0.000105018	0.000207276	0.00017376	0.000122019	0.00012213
FBti0019110	copia{}293	0.0199758	0.01802	0.0182493	0.415123	0.400229	0.366108	0.424145	0.425579	0.385797	0.0387999	0.041088	0.0469012	0.0278094	0.0242228	0.0243886	0.0296214	0.0345928	0.029248	0.0599336	0.0493955	0.051804
FBti0019109	opus{}292	0.000785339	0.000913741	0.000808099	0.000294109	0.000407031	0.000580437	0.000776651	0.000845628	0.000644512	0.00105574	0.00100023	0.000967377	0.00057153	0.000555303	0.000781383	0.000338334	0.000305397	0.000383755	0.000732914	0.000676079	0.000757256
FBti0019104	F{}287	0.000948525	0.00125315	0.000656285	0.00052352	0.00108006	0.00139672	0.000871496	0.000588655	0.00081786	0.000578149	0.000480404	0.000545584	0.000305081	0.000479303	0.000261686	0.000447051	0.000540564	0.000568644	0.000446964	0.000424874	0.000643345
FBti0019106	blood{}289	0.00174107	0.00194684	0.00209526	0.00117494	0.00119182	0.00124587	0.00264047	0.00281178	0.00198961	0.00414194	0.00347059	0.00378306	0.00365769	0.00392129	0.00250638	0.00150963	0.00201026	0.0014684	0.000938685	0.00130583	0.00138561
FBti0019108	mdg3{}291	0.00331893	0.00351136	0.00401462	0.00559654	0.00618679	0.00518261	0.00697073	0.00775786	0.00711106	0.00804637	0.00767009	0.00770434	0.00475896	0.00423661	0.00418512	0.00679949	0.00556292	0.00503794	0.00568271	0.00599499	0.00611703
FBti0019107	mdg3{}290	0.000571572	0.00125681	0.000802807	0.00251586	0.000915113	0.00125853	0.0015991	0.00114298	0.00137205	0.00285941	0.00171718	0.00183056	0.000799701	0.00125638	0.00068595	0.00320112	0.0028895	0.00275182	0.00182886	0.00239876	0.00274394
FBti0019105	jockey{}288	0	0.000245947	0	0.0007385	0.00049247	0.000123142	0	0.00012302	0.000123062	0.000246207	0.000123214	0.00012314	0.00012296	0.000245864	0.000123049	0	0.000478458	0.000246816	0	0.000860598	0
FBti0019103	gypsy{}286	0.000127121	0	0	0	0	0	0.000254036	0	0	0.00171707	0.00254609	0.000763365	0.00146098	0.000254025	0.0015256	0	0	0.000127505	0.000635547	0	0
FBti0019100	roo{}283	0.000169797	0.000246482	0.000162238	0.000363987	0.000368134	0.000445086	0.00016158	0.000153604	0.000165788	0.000145619	0.000214576	0.000258955	0.000185852	0.000185809	0.000101079	0.000246635	0.000200447	0.000202749	0.000238502	0.000323175	0.000177908
FBti0019102	blood{}285	0.00154649	0.00173994	0.00168013	0.00120787	0.00110891	0.00130364	0.00230132	0.00220364	0.00215478	0.00371111	0.00318026	0.00317834	0.00331833	0.00412734	0.00260529	0.00167485	0.00224717	0.00133134	0.00112875	0.00135937	0.0010918
FBti0019101	roo{}284	0.000311889	0.00028462	0.000255085	0.000312005	0.000366369	0.000678597	0.000189691	0.000261	0.000176321	0.00019334	0.000193513	0.000145896	0.000162623	0.000145649	0.000135616	0.00031192	0.000191156	0.000142813	0.000335588	0.000226962	0.000220388
FBti0019099	Bari1{}282	0.000248211	0.000921447	0.000498038	0.000141888	0.000514486	0.000656544	0.000354298	0.000230448	0.000336926	0.000337039	0.000461626	0.000319394	0.000372083	0.000478282	0.000230502	0.000407815	0.00022407	3.55656e-05	0.000106366	0.000283451	7.09275e-05
FBti0019098	roo{}281	0.000463876	0.000572726	0.000455121	0.000563001	0.000590463	0.000931956	0.000364664	0.000293291	0.000231985	0.000191111	0.000170788	0.000163857	0.000310193	0.000194252	0.000170558	0.00022855	0.000228802	0.000201847	0.000286485	0.000241984	0.000218326
FBti0019096	blood{}280	0.00185637	0.00193357	0.0021267	0.00133	0.00167224	0.00125237	0.00252935	0.00263394	0.00236313	0.00378064	0.00299673	0.0038765	0.00364049	0.00410437	0.00313677	0.00174129	0.00225691	0.00141609	0.00126353	0.00144776	0.00111974
FBti0019092	jockey{}277	0.000862907	0.000966445	0.00100079	0.00100404	0.00153098	0.00158641	0.000446389	0.000599665	0.000575389	0.0011328	0.00165475	0.001372	0.00132107	0.0012902	0.00118737	0.00154849	0.00181465	0.00171874	0.00189087	0.00137592	0.00159753
FBti0019093	X{}278	0.000246669	0.00103547	0.000742416	0.000296113	0.000937953	0.00113564	0.000295761	0.000937207	0.000838845	0.000246802	0.000345833	0.000148125	0.00034512	4.92915e-05	0.000394706	0.000542726	0.00105515	0.00098965	0.00054262	0.000985917	0.00103616
FBti0019095	I{}279	0	0	0	0	0	0.00076656	0	0.000255266	0.00102142	0	0	0	0.000255143	0	0	0	0	0	0	0	0
FBti0020176	mdg3{}1065	0.000333003	0.00033283	0	0.000333128	0.000555367	0.000666574	0.000332732	0.00022197	0	0.000333183	0	0	0	0.000110906	0.000111011	0.00055506	0.000215826	0	0.000110991	0.000221831	0
FBti0020178	springer{}1067	0.00134843	0.0011407	0.00105537	0.00126361	0.00121113	0.00148373	0.014078	0.0147007	0.0144417	0.0195547	0.0197716	0.0194589	0.00463945	0.00381459	0.00421628	0.0056908	0.00634929	0.00568295	0.00646538	0.00624998	0.00636536
FBti0020179	412{}1068	0.000127121	0.000254111	0.000446374	0.000508676	0.000763227	0.000890609	0.00057158	0	0.000190721	0.00038157	0.000127304	0.000445296	6.3521e-05	0.000508051	0.000508532	0.000826372	0.00024717	0.000382514	0.000444883	0.000317559	0.000699268
FBti0020183	invader3{}1072	0.00021424	0.000321193	0.000107469	0	0.00010719	0.000536056	0	0	0	0	0	0	0	0	0	0	0.00010414	0	0	0	0.000107135
FBti0020181	NOF{}Pka-R1-FB-NOF	0.00156536	0.00261822	0.00272426	0	0.000575404	0.00230208	0.00025536	0	0.00025562	0.000255707	0.000191952	0.000287754	0.000127704	0.00025535	0.00031949	0	0.000186344	0.000352466	0.000351374	6.3843e-05	6.39013e-05
FBti0020184	Tirant{}1073	0.000109091	0.000145379	0.000189706	0.000116407	0.000196491	0.000276598	0.000163503	0.000189063	0.000152758	0.000127341	6.55486e-05	3.27545e-05	0.000272556	0.000203461	9.45538e-05	0.000301847	0.000685828	0.000481446	0.000352693	0.000156243	0.000320045
FBti0020185	flea{}1074	0.0196116	0.0136016	0.0174193	0.113123	0.116332	0.152464	0.0900863	0.0842788	0.0860331	0.0168051	0.0140311	0.0210003	0.0137585	0.0192295	0.0113548	0.0216615	0.023326	0.0188455	0.0214562	0.0258141	0.0200167
FBti0020186	412{}1075	0.00049387	0.000473217	0.000434055	0.000498138	0.000571793	0.000678118	0.00218594	0.00189358	0.00166154	0.00182953	0.00234211	0.00196896	0.000652643	0.000481213	0.000363293	0.000138787	0.000309506	0.000180131	0.000195897	0.000212079	0.000277587
FBti0020187	roo{}1076	0.00032316	0.000299441	0.000209387	0.000232358	0.000286318	0.000626657	0.000232082	0.000242335	0.000198649	0.000185244	0.00024609	0.000138132	0.000148022	0.000147988	0.000171695	0.000198629	0.000153813	0.000178949	0.000141369	0.000245548	0.00016497
FBti0020188	G2{}1077	0.000643904	0.00311623	0.001258	0.000271219	0.000474765	0.00162809	0.00016931	0.000508272	0.000677932	0.000474712	0.000407261	0.000135672	0.000474159	0.000270885	0.000135571	0.000915113	0.000593045	0.000475886	0.000406638	0.000237045	0.000135578
FBti0020190	McClintock{}1079	0.00049873	0.00110138	0.000567068	9.02802e-05	0.00037548	0.000955526	0.00191261	0.00151497	0.00135397	0.000332666	0.000266372	0.000137859	0.000147152	0.000123389	4.75025e-05	0.000394274	0.00051718	0.000419244	0.000261215	0.000289516	0.000247025
FBti0020192	Cr1a{}1081	0.00251619	0.00317759	0.00276317	0.00263618	0.00290911	0.00456022	0.00197903	0.0028728	0.0028823	0.0026111	0.00279222	0.00224604	0.00282894	0.0029387	0.00192982	0.00315405	0.00361144	0.00341903	0.00301744	0.00310884	0.00358778
FBti0020191	Tc1{}1080	0.000111001	0.000166415	0.000167044	0.000277606	0.00033322	0.000333287	0.000388187	0.00022197	0	0.000166591	0	0.000333281	0.000110932	0.000110906	0.000111011	0.000388542	0.000215826	0.000501011	5.54953e-05	0.000443663	0.000499576
FBti0020189	I{}1078	0.00248649	0.0032091	0.00296375	0.00466676	0.00414875	0.00332195	0.00179497	0.00280545	0.00232157	0.00109556	0.000862386	0.000827618	0.00315176	0.00195444	0.00374148	0.000467689	0.000654229	0.000743619	0.000758421	0.000689527	0.000975345
FBti0020196	Doc{}1085	0.00168688	0.00194539	0.00171841	0.00224568	0.00268129	0.00316884	0.00182164	0.00177097	0.00177158	0.00230448	0.00257294	0.00237658	0.00186089	0.00165302	0.00218665	0.00197255	0.00196794	0.00145769	0.00168023	0.00151054	0.00207645
FBti0020197	jockey{}1086	0.00278238	0.00290734	0.0032023	0.00367508	0.00359173	0.00484016	0.00244915	0.00251101	0.00224684	0.00312735	0.0041072	0.00356225	0.00279869	0.00247311	0.00293321	0.00277061	0.00377643	0.0032559	0.00265566	0.00281033	0.00305383
FBti0020195	F{}1084	0	0	0.000228521	0	0.000227928	0.000455946	0.000227593	0	0	0	0.000228107	0.000227969	0	0.000227584	0	0	0.000221443	0	0	0	0
FBti0020201	3S18{}1090	0.0488741	0.0460755	0.0499962	0.0727334	0.0728937	0.0661483	0.0408367	0.0430836	0.0413934	0.0539776	0.0515829	0.0502408	0.0425532	0.0417591	0.0387388	0.0598687	0.0596215	0.0563225	0.0615167	0.0581282	0.0590463
FBti0020200	Idefix{}1089	0.000744201	0	0	0.00074448	0.000744687	0.000993114	0	0	0	0	0.000248424	0	0	0	0	0.00062023	0	0	0.000248044	0	0.000248103
FBti0020198	invader2{}1087	0.000452196	0.000225981	0.000113417	0.000452365	0.000339368	0.000452581	0.000112957	0.000678197	0.000226144	0.00067866	0.000452847	0.000113143	0.000338935	0.00101657	0.000339178	0.000452241	0.000439617	0.000680339	0.000226077	0.000677772	0.000678391
FBti0020203	blood{}1092	0.00187215	0.0018877	0.00184922	0.000992238	0.000971836	0.00126157	0.0025272	0.00261154	0.00220735	0.00411433	0.00354689	0.00402455	0.00335372	0.00446371	0.00293867	0.00165741	0.00212542	0.00148814	0.0011488	0.00144949	0.000921741
FBti0020204	Doc{}1093	0.00183078	0.00182334	0.00168042	0.00233803	0.00260504	0.0030409	0.00179685	0.00157087	0.00184413	0.00231244	0.00249006	0.00280043	0.00187505	0.00142704	0.00227245	0.00196081	0.00227215	0.00164094	0.00193447	0.00169314	0.00195441
FBti0020209	Ivk{}1098	0.0015806	0.00228698	0.00182619	0.00107886	0.00123904	0.0020217	0.0633949	0.0591471	0.0565137	0.0024778	0.00314861	0.00316955	0.00104357	0.00108324	0.000816053	0.00164353	0.00117605	0.00145945	0.00267593	0.00151667	0.00159224
FBti0020207	1360{}1096	0.000211285	5.27938e-05	0.000105986	0.000369887	5.28556e-05	0.000581528	0.000158334	0.000316882	0.000105664	0.000422798	0.000423177	0.000528652	0.000211152	0.000211104	5.2826e-05	5.28264e-05	0.000102704	5.29804e-05	5.28162e-05	0	0.000105657
FBti0020206	G4{}1095	0.00125148	0.00215143	0.00165734	0.00135211	0.00165303	0.00170347	0.00100037	0.0011512	0.00125174	0.00150259	0.00125328	0.00125253	0.00155087	0.00105034	0.00115147	0.00225289	0.00107067	0.00251051	0.002753	0.0026511	0.00190252
FBti0020205	blood{}1094	0.00149556	0.00181776	0.00179138	0.00118529	0.00107369	0.00107806	0.00220633	0.00216225	0.00187709	0.00360622	0.0031116	0.00318435	0.00326251	0.00366741	0.00266409	0.00169045	0.00195741	0.00137126	0.00108532	0.00132055	0.00118502
FBti0020202	Cr1a{}1091	0.000694925	0.00103192	0.00057767	0.000576011	0.001053	0.00141091	0.000575326	0.000674973	0.000714926	0.000834361	0.000795343	0.000457046	0.00053575	0.000257894	0.000555991	0.00079428	0.000772107	0.000617361	0.000595594	0.000853109	0.0011319
FBti0020210	opus{}1099	0.000922149	0.000833126	0.000626194	0.000153078	0.000241769	0.00043124	0.000748384	0.000841491	0.000616233	0.000970995	0.000907345	0.000797981	0.000551333	0.000466715	0.00060811	0.000273853	0.000258379	0.000250417	0.000571759	0.00054723	0.000648416
FBti0020211	Quasimodo{}1100	0.000943742	0.00118426	0.00103023	0.00106887	0.00128549	0.00244251	0.000976205	0.00115145	0.0012267	0.000503324	0.000512103	0.000511793	0.000781112	0.000760163	0.000590412	0.00112262	0.000929614	0.000925737	0.000943653	0.000793463	0.000931403
FBti0020215	G5{}1104	0	0.000174974	0	0	0.000175179	0.000175214	0	0	0	0	0	0	0	0	0	0	0	0	0	0	0
FBti0020218	297{}1107	0.000115157	0.000287744	0.000239952	0.000128493	0.000199441	0.00038123	8.85104e-05	3.54279e-05	0.000146191	0.000155103	0.000159678	9.75221e-05	0.000154922	0.000185864	0.000163893	0.000190472	0.000180849	0.000164372	0.000150576	8.40887e-05	8.41655e-05
FBti0020219	FB{}nrm[FB]	0.000368126	0.000572344	0.000410361	0.000368264	0.000573014	0.000532191	0.000326957	0.000368073	0.000695491	0.000368325	0.000450579	0.000736866	0.000572282	0.000531283	0.00036816	0.000899954	0.000676006	0.000410262	0.000490789	0.000326972	0.000449996
FBti0020217	S{}1106	0	0.00014242	0	0	0	0	0.000142378	0	0	0	0	0.000142613	0	0	0	0	0	0	0	0	0.000285029
FBti0020216	297{}1105	0	0	0	0	0	0.000173234	0	0	0	0	0	0	6.91912e-05	0	0	0	0	0	0	0	0
FBti0020214	X{}1103	0	0.000195657	0	0	9.79434e-05	0.000195926	9.77997e-05	0	0	0	0	0	0	0	0	0	0	0	9.78702e-05	0	0
FBti0020213	Cr1a{}1102	0.000134076	0.000469021	0.000403537	0.00046944	0.000570193	0.000738044	0.000301424	0.000234599	0.000502886	0.000268296	0.000302104	0.000268375	0.000334979	0.000200941	0.000301698	0.000268178	0.000260692	0.00040344	0.000368673	0.00053589	0.00090514
FBti0020212	Doc{}1101	0.00119807	0.00196723	0.00145953	0.0030819	0.00134157	0.00208413	0.00151061	0.00116937	0.00154068	0.00174099	0.00197108	0.0017986	0.00111179	0.00156755	0.00159757	0.00114113	0.00180257	0.0012589	0.00142614	0.000912111	0.0012553
FBti0019312	BS{}1230	0	0	0	0	0	0	0	0	0	0	0	0	0	0	0	0	0	0	0	0	0
FBti0019313	Tirant{}1231	0.000147307	0.000140049	0.000111741	0.000150956	0.000158189	0.000302057	0.000165137	0.000158063	0.000122182	1.7974e-05	1.79901e-05	4.67461e-05	0.000193893	0.00016154	6.82705e-05	0.000305423	0.000558865	0.000594608	0.000387992	0.000287207	0.000269503
FBti0019314	HMS-Beagle2{}1232	0.000157	0.00056406	0.000268195	0.000186773	0.000318452	0.000760189	8.05561e-05	0.000118794	0.000186741	0.000140103	0.000582162	0.000233574	0.000106015	7.63131e-05	9.33601e-05	0.000173991	0.000202135	0.000259619	0.000173957	0.000195039	0.000326777
FBti0019315	BS{}1233	0	0	0	0	0	0	0	0	0	0	0	0	0	0	0	0	0	0	0	0	0
FBti0019316	X{}1234	0.000158737	5.2885e-05	0.000212339	0	0	0.000105915	0	5.29048e-05	0	0	0	0	0	0	0	0	0	0	0	0	0
FBti0019317	S{}1235	0	0	0	0	0	0	0	0	0	0	0	0	0	0	0	0	0	0	0	0	0
FBti0019306	pogo{}1222	0.000823556	0.00148163	0.000991485	0.00214205	0.000988912	0.00131881	0.0021395	0.00197625	0.00181219	0.0013184	0.00230927	0.00247273	0.00395059	0.00312683	0.00197671	0.00148255	0.000960775	0	0.000988174	0	0.000494204
FBti0019307	diver{}1223	0.0003197	0.000484294	0.000305707	0.000314823	0.000374893	0.000654944	0.000499125	0.000479482	0.000439677	0.000499802	0.000590296	0.000504948	0.000459282	0.000254543	0.000364691	0.00108909	0.00121409	0.000871806	0.000844129	0.000788653	0.000719429
FBti0019310	pogo{}1228	0.000165601	0.000496547	0.00149527	0	0.000331419	0	0.002482	0.000165578	0.000662541	0.00265106	0.00182424	0.00331479	0.00430294	0.000992758	0.00215302	0.000662472	0.00177094	0.00232541	0.00165586	0.00231664	0.00149063
FBti0019311	Tirant{}1229	0.000138181	0.000185358	0.000124039	0.000160059	0.000192852	0.000254762	0.000178036	0.000141797	0.000101839	2.91065e-05	5.09822e-05	7.27877e-05	0.000119925	0.000138063	0.000127284	0.000338215	0.000593913	0.00048874	0.000458137	0.000199846	0.000363687
FBti0020310	G5{}1227	0.000709758	0.00209902	0.000877894	0.00119634	0.00143017	0.00252033	0.000670321	0.000699935	0.00101137	0.00076851	0.000603676	0.000632504	0.000884213	0.000563435	0.000408391	0.00141966	0.00151236	0.00182363	0.00183742	0.00172931	0.00190592
FBti0019309	1360{}1226	8.30251e-05	2.76607e-05	0.000194356	0.000166112	0.000221545	5.53973e-05	0.000359482	0.000166026	0.000166084	0.00016614	0.000443438	0.00044317	0.000110631	0	0.000221421	0.000166067	0.000188336	0.000166551	0.000166035	0.000110615	2.7679e-05
FBti0019308	pogo{}1225	0.00214125	0.00263401	0.00231347	0.00131818	0.000329637	0.00197822	0.00181035	0.00230563	0.00164745	0.0014832	0.00263917	0.00164849	0.0019753	0.00230398	0.00181199	0.00115309	0.00144116	0.00115645	0.000988174	0.000987507	0.000164735
FBti0020309	Stalker4{}1224	0.000324193	0.000648051	0.000650498	0.000648629	0.000567709	0.000648939	0.000161965	8.10367e-05	8.10648e-05	0.000162184	8.1165e-05	0.000162232	0.000323991	0.000161958	8.10558e-05	0.000243169	7.87937e-05	0.000487756	0	8.0986e-05	0.00032424
FBti0019305	Burdock{}1221	0.000741625	0.000817755	0.000628833	0.000761048	0.000871379	0.00104395	0.000707555	0.000674542	0.000631706	0.000421279	0.00055103	0.000656047	0.00126236	0.00119993	0.00100487	0.000162695	0.000274443	0.000143973	0.000186585	0.000167335	0.000215341
FBti0020308	G4{}1220	0.000339774	0.00107539	0.000397694	0.000509852	0.00028333	0.000340063	0.00079216	0.00067945	0.000453124	0.000623255	0.000283552	0.000566762	0.000905497	0.000282902	0.000509707	0.000566346	0.000825805	0.000454398	0.000792731	0.000565854	0.00096283
FBti0019302	Tc1{}1216	0.00174475	0.00181885	0.00184454	0.000788246	0.00153938	0.000957613	0.00181831	0.00181953	0.00157622	0.00262792	0.00246119	0.00150211	0.00189365	0.00164953	0.00155728	0.00266429	0.00295469	0.00252152	0.00287012	0.0032806	0.00285204
FBti0020307	HB{}1219	0.00536418	0.00454964	0.00475632	0.00474265	0.00548108	0.00584136	0.00458603	0.0044758	0.00496854	0.00463005	0.00588261	0.00480154	0.00394511	0.0054162	0.0038535	0.00421244	0.00479262	0.00430049	0.00511816	0.00445413	0.00449598
FBti0019304	Rt1b{}1218	0.00060334	0.00158371	0.000959928	0.000335314	0.000829372	0.00153708	0.000328826	0.000414356	0.000518125	0.000402444	0.00054928	0.000439159	0.00045679	0.000414061	0.000213322	0.000694825	0.000610256	0.000709076	0.000615471	0.000730759	0.000749712
FBti0019303	S{}1217	0.000301224	0.000726105	0.000373312	0.000319063	0.000319151	0.000904443	0.000318683	0.000124016	0.000283563	0.000620503	0.000408125	0.000319209	0.000318744	0.000194743	0.000301252	0.000283533	0.000310071	0.000248815	0.000797283	0.000283287	0.000372154
FBti0019298	rover{}1212	0.000313896	0.000363931	0.000302322	0.000309827	0.000272221	0.000624139	0.000146366	0.000292928	0.00036838	0.000301503	0.000402365	0.000406311	0.000317883	0.000175631	0.000217655	0.000234399	0.000301095	0.000314843	0.000334791	0.000188193	0.000259525
FBti0019300	HMS-Beagle{}1214	0.00127416	0.00139519	0.00143537	0.00060904	0.000805026	0.00100975	0.000738669	0.000865258	0.000730723	0.0030109	0.00266521	0.00302484	0.0034724	0.00318484	0.00377063	0.00052624	0.000760983	0.000798203	0.000943569	0.000864717	0.00116561
FBti0019301	mdg3{}1215	0.00347884	0.00376866	0.00407562	0.0056805	0.00588982	0.00555966	0.00747342	0.00806191	0.0075091	0.0086569	0.0086141	0.00823265	0.00485051	0.0042271	0.00404032	0.00705939	0.00607136	0.00641024	0.00614912	0.00661593	0.00615058
FBti0019299	17.6{}1213	0.00152002	0.00168249	0.00212585	0.00280514	0.00284678	0.00286098	0.00253432	0.00289442	0.00218745	0.00248782	0.004503	0.00267474	0.00142838	0.000929363	0.00106184	0.00176067	0.00168065	0.00189323	0.00346168	0.00313291	0.00335813
FBti0020305	1360{}1206	0	0	5.56812e-05	5.55213e-05	5.55367e-05	0.000305513	0	2.77463e-05	5.55118e-05	2.77652e-05	0.000111161	0.000194414	0	5.5453e-05	8.32584e-05	0.000138765	2.69783e-05	2.78339e-05	0.000110991	0.000110916	8.32627e-05
FBti0019296	F{}1209	0.000701373	0.000946724	0.000783453	0.000412301	0.000824832	0.00130986	0.000404587	0.000643436	0.000419463	0.000383432	0.000470669	0.000521041	0.000281819	0.000245632	0.000289253	0.000744832	0.0004288	0.000558439	0.000462718	0.000520207	0.000491755
FBti0020306	hopper{}1210	0.000449903	0.000471083	0.000150456	0.000257184	0.000493073	0.00128653	0.000556569	0.000278472	0.000107142	0.000235791	0.000708008	0.000428837	0.000128463	4.28113e-05	0.000342815	0.000749914	0.000708152	0.000795077	0.00109252	0.0011346	0.00107135
FBti0019297	Tc1{}1211	0.000189113	0.000162013	0.000325249	5.40525e-05	0.000135169	0.000162235	0.000161965	5.40245e-05	0.000216173	0.000135154	0.00016233	5.40773e-05	0.000296991	0.000377902	5.40372e-05	0.000189132	0.000183852	0.000352268	0.000108054	0.000350939	0.00024318
FBti0019295	S{}1208	0.000221681	0.000598228	0.000378084	0.000465704	0.000465833	0.000443739	0.0004873	0.000288144	0.000376934	8.87202e-05	0.0001998	0.000133119	0.000487392	0.00024364	0	4.43406e-05	0	4.44698e-05	8.86639e-05	0	0.000110856
FBti0019294	S{}1207	0.00436891	0.00557061	0.00404042	0.00573746	0.00512737	0.00491246	0.00380845	0.00478174	0.00361452	0.000197876	0.000360098	0.000161946	0.0053005	0.00488611	0.00480084	0.000269712	0.000209747	0.000216399	0.000125841	0.000179652	0.000233761
FBti0019293	Cr1a{}1205	0.000617169	0.000394783	0.000569645	0.000469224	0.000568166	0.00116127	0.000665999	0.000444298	0.00027161	0.000494002	0.000692224	0.000543562	0.000518098	0.000271322	4.93781e-05	0.000345649	0.001224	0.000594269	0.000863955	0.00044402	0.000641948
FBti0020304	Helena{}1204	0.000222002	0.000110943	0	0	0	0	0	0	0	0	0	0	0	0.000110906	0	0	0	0	0	0	0
FBti0020303	Bari2{}1203	0	0	0	0	0	0	0	0	0	0	0	0	0	0	0	0	0	0	0	0	0
FBti0020296	rooA{}1191	0.00137691	0.00129018	0.00103605	0.00172178	0.00103336	0.00129195	0.000171974	0.000430223	0.000688596	0.000688828	0.00172362	0.0012058	0.000344012	0.00077385	0.000602454	0.00137705	0.0022589	0.0010358	0.00129073	0.00197779	0.00292636
FBti0019287	S{}1192	0.000156787	0.00025073	0.000188758	0.000156846	0.000219646	0.000251074	3.13319e-05	0.000125412	0	6.27489e-05	0	0	6.26758e-05	0.000125323	6.27207e-05	6.27213e-05	6.09704e-05	0.000220164	6.27091e-05	0	0
FBti0019289	S2{}1200	0.000259905	0.000162356	6.51878e-05	0	0.000325093	0.000162579	6.49232e-05	0.000227384	0.000227463	0.000130023	0.000130139	6.50304e-05	6.49355e-05	6.49206e-05	6.49821e-05	0.000129965	0.000126337	6.51721e-05	6.49701e-05	6.49262e-05	0
FBti0019290	1360{}1201	0	0.000118684	0.000238264	0.00011879	0	0.000237693	0	0.000237456	0	0	0	0	0	0.000118644	0	0	0.000115442	0.000119103	0	0	0.000237525
FBti0019291	transib3{}1202	0.000108255	0.000151479	0.000195494	0.000129955	0.000303313	0.000346713	0.000151434	2.1648e-05	0.000108277	0.000173302	2.16822e-05	8.66766e-05	0.000151463	8.65302e-05	2.16531e-05	0.000194879	0.000126293	0.000130298	0.000129894	0.000281248	0.000281504
FBti0020302	HB{}1199	0	3.10552e-05	0	0	0	0	0	0	9.32328e-05	0	0	0	0	0	0	0	0	6.23299e-05	0	0	0
FBti0020301	1360{}1198	0.000153181	0.000178619	0.000256134	0.000229858	0.000153281	7.6656e-05	0.000127547	0.000306319	7.66063e-05	0.00025544	0.000204536	0.000434376	0.000229628	0.000178559	0.000127663	5.10656e-05	4.96401e-05	0.000153643	0.000510556	0.000204085	0.000255339
FBti0019288	S{}1196	0	0	0	0	0.000197146	0	0	9.84948e-05	0	0	0	9.85911e-05	0	0	0	0	0	0	0.000393999	0	0
FBti0020298	HB{}1194	6.16011e-05	2.0523e-05	8.24022e-05	8.21655e-05	0.000226018	0.000246614	6.15509e-05	0.000123185	0.000143765	0	0	0	2.05208e-05	2.05161e-05	0	0	1.99625e-05	4.11912e-05	4.10635e-05	0	4.10733e-05
FBti0020297	jockey2{}1193	0.000538972	0.000396931	0.000256134	0.00011351	0.000369011	0.00136277	0.000255094	8.50886e-05	0.000510708	0.000141911	0.000369301	0.000113562	0.000170095	0	0	0.000397177	0.000137889	0.000455239	0.000226914	0.000226761	0.000170226
FBti0019286	Juan{}1190	0.000282329	0.000289418	0.000246934	0.000173806	0.000268025	0.000434722	0.000282099	0.000260574	0.000275145	0.00599005	0.00545896	0.00500646	0.00578773	0.00475931	0.00461179	0.000557474	0.000689706	0.00056636	0.000673182	0.000795699	0.000738504
FBti0019285	roo{}1189	0.000338563	0.000367812	0.000358126	0.000279787	0.000405068	0.000633505	0.000187529	0.000158219	0.000198762	0.000217239	0.000287456	0.000224669	0.000216986	0.00016546	0.000165617	0.000253948	0.000225393	0.000180865	0.000312773	0.000235341	0.00026132
FBti0019284	gypsy4{}1188	0.00227702	0.00248273	0.00269979	0.00238141	0.00403917	0.00445433	0.00144783	0.00362201	0.00258805	0.00403872	0.00259125	0.00124305	0.00155154	0.000620474	0.000414042	0.00372641	0.00382363	0.00529446	0.00217331	0.00506765	0.00445118
FBti0019283	Burdock{}1187	0.000334405	0.000339006	0.000599096	0.000410994	0.000640564	0.000712412	0.000410506	0.00045377	0.000453928	0.000482759	0.000861136	0.000626337	0.00110762	0.00116464	0.00106542	0.000114665	0.000176484	0.000110207	0.000191071	4.77354e-05	0.000100336
FBti0020294	HB{}1183	0.00116904	0.00185466	0.00124731	0.00265453	0.00319375	0.00248865	0.00155745	0.00128019	0.00154048	0.00128107	0.000891979	0.000761439	0.00140939	0.000964096	0.00131761	0.00142897	0.00182204	0.00178677	0.00137303	0.0017244	0.00176309
FBti0019281	mdg3{}1184	0.00488026	0.00517739	0.0052972	0.00644836	0.00752795	0.00681819	0.00877066	0.00910407	0.00902393	0.00936583	0.00945209	0.00880736	0.00615893	0.00517564	0.00512502	0.0062578	0.00552176	0.00580826	0.00601787	0.00651866	0.00600819
FBti0019282	Quasimodo{}1186	0.00112465	0.00114072	0.0010322	0.00118757	0.00112122	0.0019719	0.000749155	0.0010162	0.00131652	0.000408427	0.000325366	0.000291819	0.000536996	0.00067005	0.000520719	0.000649862	0.000765355	0.000752027	0.00081217	0.000761676	0.000704048
FBti0020295	HB{}1185	0.000510157	0.000509893	0.000781196	0.000671511	0.000295547	0.000859944	0.000697541	0.000483237	0.000402837	0.000376108	0.000564669	0.000456837	0.000697673	0.000804822	0.000537057	0.000698179	0.000783103	0.000323176	0.000536957	0.000858551	0.00104731
FBti0019123	pogo{}308	0.00312951	0.00246939	0.00330495	0.00164773	0.000988912	0.000659406	0.00181035	0.00214094	0.00131796	0.0021424	0.00148453	0.00181333	0.00115226	0.00131656	0.00214144	0.00131782	0.000640517	0.000330416	0.000658782	0.000822922	0.000658939
FBti0019124	S2{}309	0.00281203	0.00221887	0.00133635	0.00384947	0.00251766	0.00577697	0.00414066	0.0029596	0.0023685	0.00266546	0.00163036	0.00222187	0.00325399	0.0017745	0.00503251	0.00177619	0.00374099	0.00445343	0.0047356	0.00399296	0.00162825
FBti0019125	Doc{}310	0.00111501	0.00123384	0.00146489	0.00211135	0.00248385	0.00276334	0.00102126	0.0012343	0.00179235	0.00236404	0.00194079	0.00203261	0.00168474	0.00132626	0.00119476	0.00116822	0.00153566	0.0012382	0.00139363	0.001207	0.00135414
FBti0019126	roo{}311	0.000284113	0.000307915	0.000295341	0.00022943	0.000308275	0.000784546	0.000174433	0.000205353	0.000167763	0.000188369	0.000281094	0.00020898	0.000140257	0.000174426	0.000147205	0.000205403	0.000266226	0.000219736	0.000222477	0.000201804	0.000232801
FBti0019127	S{}312	6.01891e-05	6.01579e-05	0.00012077	0	6.02284e-05	0.000120481	0.000360841	0	0.000361208	0.00036133	0.000120552	0	6.01515e-05	0	0	6.01952e-05	0	0.000120741	0.000240734	0	0.000120396
FBti0019128	Burdock{}313	0.000695064	0.00066264	0.000986986	0.000738113	0.00081322	0.000834788	0.000448752	0.000727039	0.00080216	0.0011983	0.00163843	0.00132707	0.00224419	0.00279924	0.00245968	0.000128332	0.000280687	0.000128706	9.62305e-05	0.000106851	0.000139033
FBti0019752	roo{}315	0.000275382	0.000392216	0.000414418	0.000371905	0.000337563	0.000923317	0.000158216	0.000254692	0.000268552	0.000275531	0.000234412	0.000206709	0.000206407	0.00020636	0.000330489	0.000309836	0.000287801	0.000151917	0.000399267	0.000378359	0.000234108
FBti0019129	diver{}317	0.0003197	0.00038444	0.000350811	0.000344806	0.000499858	0.000694941	0.000653853	0.000559395	0.000479648	0.000419833	0.000550276	0.000444954	0.000294539	0.000274507	0.000374683	0.0010691	0.00124808	0.00079164	0.000899072	0.00091344	0.000974226
FBti0019130	HMS-Beagle{}318	0.00105418	0.0013875	0.00119253	0.000603234	0.000690222	0.00100298	0.000892938	0.000841487	0.000867814	0.00265206	0.0027674	0.00329977	0.00353341	0.00283475	0.00377023	0.000728888	0.000657931	0.000861551	0.000889244	0.000827956	0.00122354
FBti0019131	roo{}319	0.000273461	0.000338395	0.000326608	0.000308301	0.000377883	0.000595175	0.000199507	0.000138881	0.000134587	0.000191092	0.000273854	0.000225902	0.000221234	0.000177814	0.000273486	0.000303876	0.000324932	0.000248163	0.000386281	0.000438068	0.000269159
FBti0019132	Burdock{}320	0.000592379	0.000643556	0.000762264	0.000682779	0.00100512	0.00105688	0.000579028	0.00041203	0.000463695	0.00143021	0.00154756	0.0018044	0.00254821	0.00280496	0.0022023	0.000154549	0.000425665	0.000206666	9.01361e-05	0.000128679	0.000128796
FBti0019133	BS{}321	0	0	0	0.000243236	0	0	0	0	0	0	0	0	0	0	0	0	0	0	0	0	0
FBti0019134	pogo{}322	0.000948911	0.000564535	0.000816001	0.00131089	0.00151473	0.00140197	0.00225747	0.00232676	0.00248575	0.00556091	0.004593	0.00497463	0.00302558	0.00338607	0.00311814	0.00671083	0.00847835	0.00632249	0.00587366	0.0046506	0.00472264
FBti0019135	297{}323	0.000279035	0.000208061	0.000253282	0.000150647	0.000181713	0.00030587	7.96593e-05	7.08559e-05	0.000163911	9.74935e-05	0.000106452	0.000128552	0.00019476	0.000115059	0.000128456	0.00010188	0.000198072	8.44072e-05	0.000203721	0.000203583	8.85952e-05
FBti0019136	copia{}324	0.0250282	0.021326	0.0225533	0.515925	0.499841	0.459131	0.530005	0.531992	0.475876	0.0472599	0.0493771	0.0592084	0.0314263	0.0289326	0.0284599	0.0368851	0.0417937	0.0355774	0.0739583	0.0586853	0.0645859
FBti0019137	Doc{}325	0.00170057	0.00206947	0.001921	0.00326606	0.00264995	0.00323514	0.00184187	0.00184959	0.00175935	0.00267563	0.00297054	0.00259846	0.00213412	0.00171209	0.002246	0.00192794	0.00212653	0.00171872	0.00193406	0.00143335	0.00227208
FBti0019138	roo{}326	0.000329458	0.000325928	0.00027994	0.000319493	0.000302761	0.000800795	0.000198186	0.000238655	0.0002152	0.000161455	0.000198633	0.000158137	0.000194864	0.000225049	0.000161382	0.000262248	0.000254928	0.000185458	0.000242028	0.000342642	0.000178202
FBti0019754	297{}327	0.000341522	0.000297583	0.000307492	0.000122644	0.000232211	0.000477662	6.56238e-05	0.000109446	4.81732e-05	0.00010076	0.000144698	0.000135846	0.000188157	0.000201238	0.000162019	0.000205809	0.000127701	0.000149317	0.000210148	9.62526e-05	0.000140132
FBti0019755	G4{}329	0	0	0	0	0	0	0	0	0	0	0	0	0	0	0	0	0	0	0	0	0
FBti0019139	Tirant{}328	0.000139908	0.000165595	0.000103426	0.000154694	0.000165789	0.00028374	0.000103006	0.00017302	0.000147302	4.42055e-05	6.63678e-05	6.63277e-05	0.000183975	0.000154503	0.0001031	0.000342442	0.0006944	0.00043207	0.000265065	0.000242812	0.000386645
FBti0019140	roo{}330	0.000279558	0.000275304	0.000350585	0.000312564	0.000308537	0.00070772	0.00013145	0.000197307	0.000143919	0.000172762	0.000267609	0.000263333	0.000275275	0.000184843	0.000259026	0.000304255	0.000191846	0.000218548	0.000221981	0.000271127	0.00028371
FBti0019142	jockey{}332	0.000705614	0.000652617	0.000707911	0.0011589	0.00116976	0.00128594	0.000494579	0.000400141	0.000347612	0.00136984	0.00188786	0.0014124	0.00127352	0.00125218	0.00153775	0.00164309	0.00236511	0.00231336	0.00188497	0.00169428	0.00203288
FBti0019141	Doc{}331	0.00166812	0.0016932	0.00165402	0.00267518	0.00253304	0.00283887	0.00172513	0.00189502	0.00169443	0.00199373	0.00273003	0.00241007	0.00212763	0.0016213	0.00205126	0.00197338	0.00191198	0.00178382	0.00178478	0.00156955	0.00203838
FBti0019143	HMS-Beagle{}333	0.00124072	0.0013398	0.00123606	0.000711729	0.000677199	0.0012331	0.000849592	0.000889201	0.000750659	0.00353753	0.00276306	0.00334319	0.00331664	0.00339389	0.00411298	0.000746243	0.000691671	0.000905063	0.00118421	0.000819287	0.00153594
FBti0019145	blood{}335	0.00140101	0.00165225	0.00160045	0.000905417	0.00118688	0.0010258	0.00215142	0.00249584	0.00211228	0.00368016	0.00311232	0.00349925	0.00301504	0.00362547	0.00198805	0.00146315	0.00255935	0.0016498	0.000896728	0.00123888	0.00113254
FBti0019144	Rt1b{}334	0.000473971	0.00104219	0.000921308	0.000385245	0.00078849	0.0016188	0.000201273	0.000497598	0.000539251	0.000397165	0.000593316	0.000723408	0.000367097	0.000378852	0.000260708	0.000687326	0.00065086	0.000629905	0.000515394	0.000834731	0.000728834
FBti0019146	opus{}336	0.000789574	0.000930087	0.000739605	0.000334486	0.000350703	0.000608813	0.00078893	0.000688764	0.000644681	0.00115679	0.00122237	0.000786201	0.000551551	0.000414574	0.000833963	0.000298134	0.000211484	0.000327287	0.000765331	0.000688333	0.000753426
FBti0019756	297{}338	0.000240748	0.000262498	0.000263489	0.000183913	0.000297846	0.000376763	8.30997e-05	4.37661e-05	0.000201394	0.000153286	0.000131506	0.000144569	0.000244972	0.000192434	0.00024077	0.000144463	0.000174474	0.000166836	0.000140058	0.00013559	0.00012258
FBti0019148	roo{}339	0.000327875	0.000481526	0.00031216	0.000411671	0.000385003	0.000706538	0.000150432	0.000234163	0.000180703	0.000210891	0.000321646	0.000231044	0.000264142	0.000157112	0.000217488	0.000331254	0.000230934	0.000218124	0.000311118	0.00028082	0.000257653
FBti0019147	Rt1b{}337	0.000379458	0.00115775	0.000801461	0.000279706	0.000719443	0.00141918	0.000299328	0.000599059	0.000779047	0.000519539	0.000460005	0.000359787	0.000319344	0.000239453	0.000159787	0.00107857	0.000563062	0.000440698	0.000379423	0.000638596	0.000619205
FBti0019149	G2{}340	0.000621531	0.00112594	0.000636545	0.000259068	0.000531237	0.00101085	0.000245822	0.000440188	0.000388536	0.000310933	0.000207475	0.000155512	0.000375273	0.000181125	0.000103598	0.000453245	0.000276944	0.000584442	0.000401367	0.000414035	0.000207206
FBti0019150	Tabor{}341	0.000296144	0.000546123	0.000435201	0.000684306	0.000567631	0.000734728	0.000312573	0.000254397	0.000321235	0.00035473	0.000317455	0.000321438	0.000433517	0.000408412	0.000496399	0.000775891	0.000851552	0.00079907	0.000784081	0.000929426	0.00101788
FBti0019152	blood{}344	0.00143859	0.00178905	0.00168797	0.00114138	0.00138162	0.00120399	0.00255679	0.00236425	0.00224929	0.00374733	0.00301794	0.00380222	0.00327199	0.00398166	0.00270795	0.00177362	0.00211796	0.00133927	0.00109124	0.00121856	0.00115766
FBti0019757	hopper{}343	0.000319794	0.000234394	6.41671e-05	0.000127966	0.000128001	0.000469431	0.000170418	0.000149216	0.00010662	0.000255974	0.000149452	4.26748e-05	6.39188e-05	0	4.26431e-05	0.000383791	0.000414531	0.000641517	0.000341082	0.000213032	0.000405131
FBti0019151	copia{}342	0.0239446	0.0200407	0.0217768	0.511905	0.497584	0.458452	0.531516	0.521748	0.474822	0.0458125	0.0479642	0.0568251	0.0321938	0.027511	0.0284837	0.0378318	0.040914	0.0365388	0.0754941	0.058834	0.0639429
FBti0019153	X{}345	0.000289021	0.000427958	0.000279223	0.000192753	0.000107115	0.000257127	0.000128349	6.42178e-05	0.000149893	2.14206e-05	4.28796e-05	0.000171415	4.27912e-05	6.4172e-05	0.000107055	0.000128467	0.000249761	0.000193262	0.000149849	0.000117659	0.000278357
FBti0019758	297{}346	0.000197088	0.000302045	0.00032955	0.000175255	0.000144626	0.000337527	5.2514e-05	8.75822e-05	0.000109516	8.76421e-05	0.000114037	0.000293687	0.000201342	0.000231927	0.000192726	8.32234e-05	0.0001618	8.34659e-05	0.000162035	0.000161926	5.25644e-05
FBti0019154	HMS-Beagle{}347	0.000948719	0.0013076	0.00116477	0.000593713	0.000697916	0.00125737	0.000753163	0.000831635	0.000918582	0.00294739	0.00268106	0.00262741	0.00317774	0.00304283	0.00340964	0.000563223	0.000614885	0.000716944	0.000978952	0.000662294	0.0010875
FBti0019156	F{}349	0.000476448	0.000952402	0.000602411	0.000352573	0.000705342	0.00135871	0.000299983	0.000280607	0.000280705	0.000267739	0.000248371	0.000333139	0.000319608	0.000241281	0.000234982	0.000724535	0.000564716	0.000582627	0.000345882	0.000449995	0.000600541
FBti0019158	BS{}351	0	0	0	0	0	0	0	0	0	0	0	0	0	0	0	0	0	0	0	0	0
FBti0019161	H{}354	0.00143812	0.00172049	0.00181443	0.00244136	0.00187513	0.00257337	0.00145872	0.00230937	0.0025717	0.000654043	0.00100377	0.00133028	0.00187274	0.00167637	0.00100242	0.000130751	0.000444854	0.000305975	0.000152513	0.00015241	0.000130757
FBti0019160	F{}353	0.000635959	0.00073733	0.000612509	0.000500475	0.000576979	0.00143425	0.000491408	0.00043239	0.000729382	0.000517526	0.000450058	0.000551624	0.000338966	0.00034736	0.000262887	0.000576661	0.000403935	0.000408241	0.000466326	0.000643943	0.000415553
FBti0019159	Quasimodo{}352	0.000783844	0.00124355	0.00104021	0.00077584	0.00123671	0.00205467	0.000824645	0.00089984	0.000866967	0.000340264	0.000323957	0.000224142	0.000373026	0.000468246	0.000327669	0.00078807	0.000838646	0.000831965	0.000754742	0.000837115	0.000688554
FBti0019157	Doc{}350	0.00133738	0.00181036	0.00169996	0.00229257	0.00267	0.00282648	0.00175144	0.00167472	0.0012857	0.00246184	0.00246405	0.00204672	0.00191397	0.00158272	0.00225297	0.00162319	0.00172304	0.00169304	0.00164235	0.00136878	0.00185701
FBti0019155	pogo{}348	0.00329422	0.00312789	0.000826238	0.00131818	0.000988912	0.00181337	0.00131662	0.000823438	0.00247117	0.001648	0.00164948	0.00230788	0.00131686	0.00312683	0.00296507	0.000988366	0.000640517	0.000330416	0.000658782	0.000658338	0.000988408
FBti0019162	H{}355	0.00165601	0.00121959	0.00163955	0.00139506	0.00191874	0.0023771	0.00213365	0.00220044	0.00178712	0.00113368	0.00104741	0.00128666	0.00215583	0.00195939	0.00117675	0.000196127	0.000233019	0.000305975	0.000152513	0.000130637	0.00015255
FBti0019164	X{}357	0	0.000169173	0	0	0.000169372	0	0.000338246	0	0	0	0	0	0	0	0	0	0	0	0	0	0
FBti0019163	blood{}356	0.00175714	0.00217773	0.00201589	0.00122426	0.00132802	0.00117105	0.00256127	0.00274488	0.00236539	0.00426078	0.00352348	0.00394342	0.00423516	0.00513059	0.00321276	0.00159192	0.00217452	0.00149704	0.00121955	0.00130135	0.00134389
FBti0019165	BS{}358	0.000276477	0.000223699	0.00042267	0.000223898	0.000276657	0.000685193	7.8929e-05	0.0001448	0.000237028	5.26907e-05	5.27381e-05	9.22359e-05	0.00019736	5.26172e-05	0.000118501	9.21682e-05	0	6.60263e-05	0.000157972	0.000118399	9.21722e-05
FBti0019166	Doc{}359	0.00200394	0.00198994	0.00171768	0.00283511	0.00267366	0.00318697	0.00161999	0.00196475	0.00155029	0.00249817	0.00279916	0.00286238	0.00195732	0.00180783	0.00243219	0.00198468	0.00213734	0.00183435	0.00179624	0.00169783	0.00204314
FBti0019170	F{}kuz[F363]	0.000534961	0.000795504	0.000785418	0.000535161	0.00078338	0.00141689	0.000495413	0.000476177	0.000495918	0.000424283	0.000352798	0.000463584	0.000352071	0.000404136	0.000319701	0.000411047	0.00046934	0.000471138	0.000547957	0.000365058	0.000528512
FBti0019171	G2{}364	0.000319128	0.000691085	0.000426889	0	0.000638672	0.000585566	5.31446e-05	0.000239312	0.000292593	2.66084e-05	0.000133161	0.000133081	0.000132887	5.31424e-05	5.31929e-05	5.31933e-05	5.17084e-05	0.000106697	7.97744e-05	2.65735e-05	0
FBti0019169	Transpac{}362	0.00108561	0.00107338	0.00148732	0.0023939	0.00272163	0.00316029	0.00372654	0.00423676	0.00427325	0.00251109	0.00301602	0.00212629	0.000828278	0.00117215	0.000647921	0.00274931	0.00237183	0.00269293	0.00270792	0.00454904	0.00325728
FBti0019168	jockey{}361	0.000452196	0.000451961	0.000113417	5.65456e-05	0.000509052	0.000339436	0.000112957	0.000226066	0.000113072	0.00033933	0.000509453	0	0.000451913	0.000790665	0.000339178	0.000621832	0.000164856	0	5.65192e-05	0.000169443	0.000169598
FBti0019167	Quasimodo{}360	0.000942463	0.00110381	0.00104133	0.00107572	0.00131283	0.00201535	0.000979031	0.000925723	0.00105478	0.000324017	0.000465673	0.000253472	0.000688771	0.000676167	0.000689265	0.000755707	0.00100101	0.000712102	0.000751408	0.00063474	0.000668539
FBti0019173	roo{}366	0.000249349	0.000239117	0.00024002	0.000212363	0.00034055	0.000674492	0.000164975	0.000185301	0.000188735	0.000117999	0.000249708	0.000158503	0.000195314	0.000144768	0.000144905	0.000246004	0.000176896	0.000196025	0.000249326	0.000175084	0.000229165
FBti0019172	Doc{}365	0.000702264	0.00125757	0.0014091	0.00125869	0.00128832	0.00193287	0.000701692	0.00140433	0.00149261	0.00193227	0.00193401	0.00114213	0.00193002	0.00140333	0.00172656	0.00111203	0.00216197	0.00123267	0.000702198	0.00105259	0.00152179
FBti0019760	hopper{}368	0.000149445	0.000277397	0.000257026	2.13573e-05	0.000106816	0.000790598	0.000170655	0.00017077	0.00040572	0.000405856	0.000427601	2.13671e-05	0	0.000191979	4.27026e-05	0.000277569	0.000456619	0.000642411	0.00032021	0.000575988	0.000640571
FBti0019175	roo{}371	0.000286006	0.000393475	0.000351076	0.000360166	0.000457908	0.000673529	0.000174826	0.000205222	0.00022212	0.00015823	0.000188699	0.000235731	0.000225299	0.000184904	0.00018508	0.000201907	0.000235524	0.000307118	0.000225419	0.00021518	0.00019855
FBti0019174	jockey{}370	0.000169261	0	0.000594343	0	0.000169372	0	0	0.000253855	0	0	0	0.000169402	0	0	8.46383e-05	8.46391e-05	0	0	0	0	0.000169285
FBti0019178	opus{}374	0.00096489	0.000838246	0.000943525	0.000301386	0.000358505	0.000570463	0.000756638	0.000899621	0.00068004	0.00127092	0.00128837	0.000904575	0.00063472	0.000561354	0.000741038	0.000399024	0.000324557	0.000441022	0.000700192	0.000642765	0.000757364
FBti0019177	jockey{}373	0.000260365	0	8.70709e-05	0.000260462	0.00034738	0.000347449	0	0.000433879	0	0.00017367	0.000173826	0.000608025	0.000260202	0.000606998	0.000433981	0	0.000253122	0	0	0	0.000347203
FBti0019176	copia{}372	0.0219605	0.0205088	0.0214167	0.513774	0.498169	0.458774	0.516031	0.512609	0.466213	0.0418833	0.044175	0.0523724	0.0311705	0.0264157	0.0264229	0.0335455	0.0395036	0.0334581	0.0675959	0.0538534	0.0581249
FBti0019179	blood{}375	0.00147973	0.00163595	0.00182874	0.00119085	0.00121599	0.00118314	0.00254406	0.00253337	0.00230274	0.00415625	0.00360945	0.00397958	0.00352353	0.00411328	0.00280266	0.00139721	0.00207749	0.00122716	0.00110763	0.00124318	0.00115337
FBti0019762	297{}376	0.000201468	0.000306423	0.000232882	0.000192781	0.000197217	0.000455881	3.50094e-05	8.75822e-05	8.3232e-05	0.000184048	0.000153511	0.000113968	0.000266997	0.000236303	0.000254048	0.000140166	0.000136253	0.000109824	0.000162035	0.000227571	9.19877e-05
FBti0019768	H{}382	0.00176496	0.00174227	0.00142094	0.00178742	0.00213678	0.00324943	0.00215542	0.00150327	0.00237556	0.000719448	0.00122198	0.000937737	0.0020034	0.00163283	0.0018305	6.53755e-05	0.000317753	0.000240409	0.000174301	0.00015241	0.000305099
FBti0019766	H{}380	0.00119843	0.0016116	0.00157396	0.00185282	0.00178792	0.00274784	0.00222073	0.00252724	0.00237556	0.000632242	0.00102559	0.00100316	0.00243892	0.00171991	0.00146004	0.000196127	0.000148285	0.000262264	0.000130726	0.000261275	0.000174342
FBti0019763	H{}377	0.00150349	0.00176405	0.00139908	0.00189641	0.00215859	0.00189732	0.00222073	0.00163399	0.00196147	0.000893859	0.00120016	0.000763275	0.00191629	0.00154574	0.00204842	0	0.000296569	0.00032783	8.71505e-05	8.70917e-05	6.53784e-05
FBti0019180	Tabor{}384	0.000284028	0.000400014	0.000181334	0.000619929	0.000452157	0.000620225	0.000167698	9.03595e-05	0.000271173	0.000374603	0.000258579	0.00056853	0.000593505	0.000335382	0.000542285	0.00105876	0.0010041	0.00111364	0.000981095	0.000967532	0.00153655
FBti0019182	H{}386	0.00156886	0.00143737	0.00131164	0.00185282	0.00128643	0.003184	0.00256909	0.00183007	0.00217941	0.000479632	0.000916483	0.00135209	0.00174208	0.00169814	0.00141646	8.71674e-05	0.000338936	0.00028412	0.000130726	0.00015241	0.00039227
FBti0019181	H{}385	0.00135096	0.00182938	0.000918146	0.00178742	0.00191874	0.00270422	0.00219896	0.0025926	0.0018525	0.000850256	0.00106923	0.00128666	0.0025478	0.00143689	0.00159079	8.71674e-05	0.000296569	0.000437107	0.00045754	0.000217729	0.000305099
FBti0019183	copia{}387	0.0207058	0.0188753	0.019645	0.507066	0.47795	0.445203	0.523537	0.54204	0.5027	0.060377	0.0605742	0.0755916	0.0335129	0.0281548	0.0291277	0.0641647	0.0692165	0.0589567	0.129964	0.102385	0.109001
FBti0019770	1360{}389	0.000388152	0.000332529	0.000194708	0.000166413	0.000249689	0.000527227	0.000193918	0.000277212	0.000415962	0.00011096	0.000416476	5.54965e-05	0.000471032	0.00038782	0.000443643	0.000166367	0.000161723	0.000166852	0.000194058	0.000443261	0.000388207
FBti0019184	297{}388	0.000157626	0.000231939	0.000219637	8.76025e-05	0.000232211	0.000346195	5.68739e-05	9.63129e-05	0.000105105	0.000118283	9.64653e-05	0.000131464	0.000148775	0.000122493	0.000188292	0.000118231	0.000144727	0.000101009	0.000122586	0.000122503	0.000135753
FBti0019185	HMS-Beagle{}390	0.00135447	0.00146225	0.00124129	0.000660119	0.00064727	0.00111231	0.000928273	0.000889831	0.00072948	0.00313608	0.00283458	0.00302838	0.00361401	0.00352209	0.00376422	0.000594812	0.000730146	0.000984083	0.00102878	0.0010064	0.00143282
FBti0019186	Doc{}391	0.0018422	0.00202926	0.00204343	0.00287465	0.00259634	0.00319413	0.00206754	0.00208839	0.00213453	0.00265446	0.00313754	0.00240854	0.00199663	0.00202209	0.00250406	0.00189428	0.00217563	0.00197137	0.00212092	0.00195097	0.00196573
FBti0019188	pogo{}393	0.00214125	0.00131701	0.00181772	0.000659091	0	0.00115396	0.00181035	0.00115281	0.000988468	0.0018128	0.00115464	0.00263758	0.000987649	0.000987421	0.00214144	0.00065891	0.000480388	0.000660831	0.000823478	0	0.000658939
FBti0019771	1360{}396	0.0001939	0.000332228	0.000222322	0.000304815	0.000194027	0.000360408	0.000166065	5.53922e-05	0	0.00011086	5.54799e-05	0.000277232	0.000110731	0.000221411	0.000249323	8.31085e-05	0.000134648	0.000333403	0	8.30363e-05	8.31121e-05
FBti0019190	F{}395	0.000775849	0.0010361	0.000954982	0.000580474	0.000887264	0.00189234	0.000547212	0.000456317	0.000586896	0.000443582	0.000489684	0.000463288	0.000475643	0.000280109	0.000215171	0.000567274	0.000462702	0.000457758	0.000541088	0.000325736	0.000443406
FBti0019189	H{}394	0.00169959	0.00187294	0.00128978	0.00178742	0.00178792	0.00218082	0.00171998	0.00289761	0.00215762	0.000719448	0.00102559	0.00141751	0.00191629	0.00198116	0.00154721	0.000130751	0.000338936	0.000218554	0.000152513	0.000217729	0.000239721
FBti0019187	opus{}392	0.000780491	0.000788128	0.000940446	0.000313923	0.000426732	0.000567747	0.000607	0.000808537	0.000788697	0.00104658	0.00100723	0.00102676	0.000659383	0.000586877	0.000933456	0.000273601	0.000215118	0.000342999	0.00063962	0.000611048	0.000667938
FBti0019191	F{}397	0.000819917	0.0013398	0.00100538	0.000442661	0.000846499	0.00173241	0.00046164	0.000442432	0.000696421	0.000475288	0.000540882	0.000397275	0.00032516	0.000214556	0.000344917	0.000748412	0.000556711	0.000502571	0.000435947	0.000468164	0.000572723
FBti0019192	H{}398	0.00106769	0.00156804	0.00181443	0.0019836	0.00139545	0.00257337	0.0020901	0.00246188	0.00329091	0.000741249	0.000894662	0.00137389	0.00233004	0.00137157	0.00176512	0.000130751	0.000105918	0.000131132	0.000196089	0.000217729	0.000174342
FBti0019193	copia{}399	0.0204242	0.018158	0.0201382	0.450018	0.434681	0.397836	0.465607	0.468962	0.428519	0.0408645	0.0435667	0.0498277	0.0330034	0.0268738	0.0262621	0.0294304	0.0365976	0.0284531	0.0629934	0.0504143	0.0531224
FBti0019196	roo{}402	0.000343811	0.000347002	0.000294206	0.0003608	0.000350781	0.000607243	0.000171766	0.000175251	0.000185426	0.000188861	0.000259917	0.000212531	0.000198747	0.000151552	0.000188776	0.000350588	0.000294924	0.000192709	0.000235927	0.000306498	0.000259581
FBti0019197	Tc1{}403	0.000200565	0.000601382	0	0.00015048	0.000351217	0.000301104	0.000250502	0.000200536	0.000150454	5.01683e-05	0.000100427	0.000150549	0.000450988	0.000150295	0.000351021	0	0.000438717	0	0.000451228	0.000400821	0
FBti0019195	H{}401	0.00122022	0.0018076	0.00201118	0.0020054	0.00213678	0.00300954	0.00204656	0.00257081	0.00224479	0.000501433	0.00109105	0.00106858	0.00222116	0.00180699	0.00141646	0.000217918	0.00042367	0.000131132	0.000326814	0.00037014	0.000108964
FBti0019194	pogo{}400	0.000735963	0.00059135	0.000608061	0.00184781	0.00144401	0.0019498	0.00263866	0.00271257	0.00252588	0.00466362	0.00394524	0.00486719	0.00344677	0.00364783	0.00317503	0.00734594	0.00716893	0.00716471	0.00650761	0.00566689	0.00528237
FBti0019198	Doc{}404	0.0018892	0.0017844	0.00184325	0.00290955	0.00262452	0.00324882	0.00183577	0.0016942	0.00161686	0.00219552	0.00293216	0.00235211	0.0021735	0.00151137	0.00253216	0.00214261	0.00207018	0.00185583	0.00174621	0.00171909	0.00218166
FBti0019199	Doc{}405	0.00182985	0.00170843	0.00163794	0.00207168	0.00207226	0.00307063	0.00128095	0.00180768	0.00153432	0.00217069	0.00252378	0.00200684	0.0016973	0.00154364	0.00208205	0.00130403	0.00147003	0.00171447	0.00140239	0.00121531	0.00147943
FBti0019200	Doc{}406	0.00186814	0.00176993	0.00178963	0.00299794	0.00232372	0.00337591	0.00204162	0.00197813	0.00162198	0.00252466	0.00279326	0.00290843	0.00221055	0.00200265	0.00260137	0.00208241	0.0023522	0.00177618	0.00220524	0.00206116	0.00183597
FBti0019201	297{}407	0.000131712	0.000276452	0.000211426	0.00014933	0.000171338	0.00033835	7.8963e-05	7.9016e-05	0.000193217	0.000166926	0.000118712	0.000153793	0.000184282	0.000144759	0.000118552	7.46444e-05	0.000166463	0.000127706	0.00021511	0.00016232	0.000144904
FBti0019773	blood{}409	0.00146634	0.00168852	0.0014877	0.000962778	0.00126891	0.00122368	0.00243916	0.00242841	0.00202025	0.00378563	0.00299482	0.00336921	0.00312487	0.00407336	0.00240007	0.00150367	0.00208814	0.00123047	0.000797121	0.00124647	0.00110715
FBti0019202	X{}411	0.000115391	0.00051899	0.000115767	0	0.000230932	0.00121264	0	0.000461497	0.000115414	0	0.000231114	0	0.000115319	0.000230584	0.000346204	0.000692414	0.000112181	0.000462955	0.00034614	0.000115302	0.000288518
FBti0019204	jockey{}413	0.000969926	0.000935994	0.000905975	0.00250937	0.00197459	0.00140592	0.00183802	0.00160516	0.00153882	0.00291135	0.00318192	0.00281178	0.00297481	0.00277362	0.00284315	0.00374629	0.00442208	0.00593774	0.00354491	0.00287412	0.00411441
FBti0019778	Doc{}417	0.00138814	0.00161433	0.00125599	0.00249179	0.00236267	0.00273968	0.00173051	0.00152414	0.00177121	0.00218717	0.00296865	0.00240205	0.0019318	0.00138695	0.00225106	0.00177102	0.00202428	0.00165907	0.00161501	0.00145188	0.00190085
FBti0019205	roo{}419	0.000222736	0.000290081	0.000369049	0.000266708	0.000398484	0.000658644	0.000148369	0.000229452	0.000259911	0.000145194	0.000202778	0.000226299	0.00020236	0.000114644	0.000121503	0.000202507	0.000262472	0.000169248	0.000242961	0.000205703	0.000243019
FBti0019776	opus{}415	0.000854141	0.000853698	0.000994354	0.000326469	0.000366875	0.000673411	0.000776957	0.000809706	0.000709243	0.00103197	0.000915892	0.0009355	0.000640205	0.000515266	0.000705134	0.000366673	0.000293767	0.000339454	0.000620403	0.000515311	0.000801879
FBti0019203	Cr1a{}412	0.00020222	0.000606344	0.000202878	0.000354017	0.000505879	0.000607176	0.000303082	0.000353834	0.000455087	0.000708151	0.00126569	0.000252985	0.000656803	0.000454605	0.000404476	0.000859519	0.000835526	0.000507073	0.000707702	0.000606192	0.00070787
FBti0019780	1360{}420	0.00175244	0.00194016	0.00266878	0.00222958	0.00318343	0.00250948	0.00176897	0.00230031	0.00142022	0.00248172	0.00222295	0.00197876	0.00205671	0.00204725	0.00162677	0.00278621	0.00349475	0.00295658	0.0019949	0.00261317	0.00302002
FBti0019781	G4{}422	0	0	0	4.30446e-05	8.61131e-05	0.000172261	0.000214967	0.000860446	0.000645558	0	0	4.30644e-05	8.60031e-05	0	4.30324e-05	0.000129098	8.3663e-05	4.31582e-05	0	8.59908e-05	0
FBti0019206	pogo{}421	0.0104851	0.0126084	0.0147927	0.00819458	0.0057378	0.00623086	0.00769375	0.00819034	0.00557136	0.0086877	0.0108284	0.0103299	0.0121159	0.011622	0.00983072	0.00180231	0.00143346	0.0054227	0.00458682	0.00442002	0.00524332
FBti0019207	flea{}423	0.0171524	0.0112562	0.0156773	0.103557	0.107911	0.140146	0.0803432	0.0775837	0.0782639	0.0139431	0.0109726	0.0180281	0.0124506	0.0159424	0.0100055	0.01948	0.0208767	0.0168184	0.0190307	0.0237082	0.0173441
FBti0019786	G2{}428	0.000393895	0.000699895	0.000131726	0.00017513	0.000437947	0.000394231	8.74609e-05	0.000262559	0.00043775	0.000350318	0.000306804	0.000219013	0.000174955	0.000131186	8.75402e-05	0.000306393	0.000255292	0.000351185	4.3762e-05	8.74649e-05	0.000131317
FBti0019788	jockey2{}430	0	0	0.000288601	0	0.000575705	0	0	0	0	0.00014391	0	0	0	0	0.000287691	0	0	0	0	0	0
FBti0019792	copia{}434	0.000569095	0.0007584	0.00152253	0.0276114	0.0283784	0.0255362	0.0254936	0.023614	0.0213454	0.00161331	0.00427435	0.00417684	0.00218017	0.00293781	0.00294059	0.00227661	0.001752	0.00228324	0.00407813	0.00521269	0.00455341
FBti0019793	pogo{}435	0.000522209	0.000478444	0.000436591	0.00152368	0.0015241	0.000609763	0.0016958	0.0023496	0.00200221	0.0036139	0.00344282	0.00457314	0.00160914	0.00152181	0.00156677	0.0057884	0.00659987	0.0065473	0.0039162	0.00400053	0.00474408
FBti0019791	pogo{}433	0.000505073	0.000447118	0.000405374	0.0014003	0.000895284	0.00103989	0.00158608	0.00210657	0.00207844	0.00378287	0.00290474	0.00404395	0.00295643	0.00250878	0.00285753	0.00609034	0.00579407	0.00503701	0.00489153	0.00421051	0.00404116
FBti0019789	G{}431	0.000967971	0.00304753	0.00172374	4.84167e-05	0.000726452	0.00191337	0.000749566	0.000677482	0.00147646	9.68494e-05	4.84682e-05	9.68778e-05	0.00029021	0.000145071	0	0.000242017	0.000893992	0.000266995	0.000338758	0.000483613	0.000484055
FBti0019787	G5{}429	0.000434557	0.000108583	0	0.00043472	0.000434841	0.000108732	0.000217101	0.000108624	0.000217323	0.000108698	0.000217591	0.00043492	0.000759999	0	0.000217298	0.0002173	0.000105617	0.000217934	0	0.000542779	0
FBti0019785	G2{}427	0.000696279	0.0014551	0.000889059	0.000126644	0.000316697	0.000886929	0.000505972	0.000316445	0.000379866	0.000253329	0	0	0	0.000126488	0	0	0.000246149	0.000634889	0.000379753	0.000379496	0.000189921
FBti0019784	BS{}426	0.000703228	0.000672304	0.000920241	0.000275279	0.000489521	0.000826232	0.000519354	0.000580844	0.00067279	0.000428283	0.000551144	0.000336607	0.000580564	0.000672077	0.000519825	0.000519829	0.000921462	0.00046001	0.000672589	0.000855445	0.000733908
FBti0019783	X{}425	0.000231425	0.000539712	0.000420133	8.81949e-05	0.000352878	0.000959578	0.000242248	0.000209355	0.000198405	0.000176419	4.41444e-05	0.000132353	0.000143174	0.000143141	6.61275e-05	0.00024247	0.000278556	0.000353711	0.000253442	0.0001872	0.000132262
FBti0019782	G{}424	6.29082e-05	0	0.000189339	6.29317e-05	0.000440645	0	0	0.000125798	6.2921e-05	0	0	0	0	0	0	0	0	0	0.000251609	0	0.000377503
FBti0019797	Helena{}439	2.83145e-05	0.000282998	0.00025566	8.49753e-05	0.000141665	0.000170032	0.000282914	0.000481277	0.000623045	8.49894e-05	0	8.50143e-05	5.65935e-05	0	0	0.00031149	0.000192688	0.000170399	0.000226495	0.00031122	0.00019823
FBti0019800	hopper2{}442	0.0001159	1.93067e-05	0	7.72957e-05	0.000231952	0.000599328	0.000752737	0.000463534	0.000637581	5.79814e-05	0	0	0	7.72006e-05	0	3.86372e-05	7.51174e-05	0	3.86297e-05	7.72074e-05	7.72778e-05
FBti0019806	Ivk{}448	0	0	0	0	0	0	0	0.000155492	0	0	0	0	0	0	0	0	0	0	0.000155499	0	0.000155536
FBti0019807	S2{}449	0	0	0	0	0	0	0	0	0	0	0	0	0	0	0	0	0	0	0	0	0
FBti0019817	mdg3{}459	0.000253192	0	0	0	0	0.00101363	0.000758958	0.000126578	0.00063311	0	0	0	0.000253034	0	0	0.000253218	0	0.000253956	0	0.000379496	0.000253229
FBti0019818	hopper2{}460	0	0	0	8.35088e-05	0.000292362	0.000710164	0.000375343	0.000563393	0.000396599	0	0	0	0	0	0	0	0	0	4.17349e-05	4.17067e-05	6.26172e-05
FBti0019208	G2{}463	0.000238415	0.000178718	0	0.000655885	0.000357855	0.00053689	0.00011911	0.000893926	0.000596158	0	0	0	0	0	0	0	0	0	5.9598e-05	0	0
FBti0019209	transib2{}464	0.000461255	0.000282558	0.000313481	0.000595391	0.000774223	0.00102754	0.000223006	0.000312418	0.00013394	0.00016376	0.000119205	0.000223374	0.000208178	0.000208131	5.95223e-05	0.000491063	0.000376098	0.00047757	0.000446334	0.000341958	0.000491084
FBti0019822	copia{}466	0.0182543	0.0168817	0.0171426	0.408948	0.397554	0.359908	0.43151	0.422284	0.388738	0.0404255	0.0397819	0.0463206	0.0281173	0.0244988	0.0244326	0.0287333	0.0343003	0.0298983	0.0596589	0.0462345	0.0520665
FBti0019211	pogo{}469	0.00214125	0.00181088	0.00297446	0.00148296	0.000659275	0.00164852	0.00181035	0.000823438	0.0014827	0.001648	0.00131959	0.00131879	0.00312755	0.000658281	0.00197671	0.000823638	0.000480388	0.000991247	0.00164696	0	0.000823674
FBti0019212	flea{}470	0.0166736	0.011252	0.0157989	0.101749	0.10371	0.140118	0.0829409	0.0752001	0.0771821	0.0136228	0.0112131	0.0169558	0.0121153	0.0168297	0.0104852	0.0180948	0.0200238	0.0167239	0.0179025	0.0230585	0.0160606
FBti0019210	blood{}468	0.00168663	0.00190887	0.00167968	0.00101732	0.00112515	0.00117916	0.00268071	0.00238078	0.00223689	0.00391278	0.00354784	0.00386428	0.00352813	0.00417166	0.00290639	0.0015421	0.00226264	0.00139732	0.000983774	0.00154902	0.00114939
FBti0019820	G2{}462	0.000750599	0.00154977	0.00109984	9.87999e-05	0.000484254	0.000988472	0.000503281	0.00038512	0.00064209	0.000256922	0.000267044	8.89608e-05	0.000197402	0.000118414	7.90176e-05	0.000355582	0.000316851	0.000386337	0.000306136	0.000207243	0.000227187
FBti0019819	hopper2{}461	0.000356312	0.00114093	0.000714945	0.000297038	0.00054142	0.000911353	0.000520847	0.000653146	0.000818365	0.000105631	0.000138765	0.000112266	0.000164856	9.22982e-05	3.95939e-05	0.000197971	0.000218104	0.00015222	0.000145151	0.000105493	7.91919e-05
FBti0019805	S{}447	0.00017407	0.000386621	0.000291061	0.00011609	0.000116122	0.000251648	0.000367181	0.000386766	0.00019345	0.000212867	0.000116214	0.000232287	5.79869e-05	0.000115947	0.000116057	0.000174087	0.000131621	0.000193994	0.000348107	0.000251241	0.000116063
FBti0019799	1360{}441	4.35897e-05	8.71341e-05	0.000145772	0.000327045	0.000392563	0.000545335	0.000769457	0.000748182	0.000777507	9.44953e-05	7.2754e-05	8.72521e-05	8.71248e-05	0.000152433	4.35937e-05	0.000188907	0.000120068	0.000174884	0.000217928	0.000101631	0.000101724
FBti0019798	invader3{}440	8.95798e-05	0.000179067	8.98714e-05	0	0.000448191	0.000717249	0.000895067	0.00116437	0.000985578	8.96282e-05	8.97087e-05	0	0	0	8.9588e-05	0	0.000261263	0	0	0.000179022	0.000179185
FBti0019795	pogo{}437	0.000522209	0.000521938	0.000349273	0.00187195	0.00117574	0.00130664	0.00182624	0.00339387	0.00287273	0.00326557	0.00300702	0.00335364	0.00204404	0.00286969	0.00282889	0.00487444	0.00588065	0.00510689	0.00422079	0.00426143	0.00343837
FBti0019214	blood{}472	0.00172797	0.00179731	0.00172945	0.00108762	0.00107551	0.0011502	0.00229657	0.00235598	0.00215006	0.00376387	0.00293515	0.00338848	0.00338354	0.00411383	0.00246403	0.00148008	0.00211394	0.00150098	0.000909371	0.00114421	0.000942662
FBti0019824	Stalker4{}473	0	0.000614163	8.80689e-05	0	0.000263521	0.000615005	0	0.000351082	8.78009e-05	8.78305e-05	0	0.00070285	8.77281e-05	0.000263124	0	0.000263375	0	0	0.000351099	8.77155e-05	0.000175591
FBti0019215	Cr1a{}474	0	7.47751e-05	7.50575e-05	3.74209e-05	0	0	0	0	3.74145e-05	7.48543e-05	0.000224765	0.000149753	0	0	0	0	0	0	3.74034e-05	7.47563e-05	0.000112237
FBti0019213	X{}471	0	0.000182264	0.000182953	0.000182427	0	0	0	0	0	0	0	0	0.000273367	0	0	0.000182377	0	0	0	0.000364437	0
FBti0019219	X{}479	0.000213877	0.000285022	0.000318609	3.89013e-05	0.000116736	0.000298386	8.41859e-05	0.000136084	0.000142614	0.000116723	9.08663e-05	2.59461e-05	7.12478e-05	4.5329e-05	2.59269e-05	7.12995e-05	0.000163822	0.000110511	7.77662e-05	0.000129523	7.13026e-05
FBti0019825	1360{}478	0.000333003	0.000138679	0.00044545	0.000166564	0.000305452	0.000333287	0.000221821	0.00022197	0.000194291	0.000277652	0.000250112	0.000249961	0.000305062	0	0.000277528	5.5506e-05	2.69783e-05	5.56678e-05	5.54953e-05	2.77289e-05	0.000166525
FBti0019218	jockey{}477	0.000531265	0.000671366	0.000882198	0.00120343	0.00114266	0.0013568	0.000591847	0.000518977	0.000574127	0.00146635	0.00161443	0.00139955	0.00132428	0.00126296	0.00140462	0.00213138	0.00168006	0.00188647	0.00194168	0.00151935	0.00200932
FBti0019217	Quasimodo{}476	0.000835535	0.000974285	0.000838256	0.000882283	0.00139347	0.00195124	0.000973996	0.000928239	0.0011607	0.000278662	0.000650796	9.29146e-05	0.000649454	0.000510168	0.000464229	0.000557079	0.000992801	0.00097773	0.00134601	0.000556595	0.000185701
FBti0019220	Tirant{}481	0.00119857	0.00117555	0.0010826	0.000926342	0.00105363	0.00210021	0.00114536	0.0010304	0.00112412	0.000164378	0.000254267	0.000186848	0.000992584	0.00121619	0.000709497	0.00222933	0.00377156	0.00331817	0.00226997	0.00151851	0.00240495
FBti0019829	HB{}484	0.00169383	0.00209779	0.00247514	0.00209966	0.00250556	0.00173213	0.00183962	0.00143587	0.00176784	0.00235791	0.00398255	0.00206378	0.00183997	0.00213387	0.00110477	0.003388	0.00282805	0.00177281	0.00287188	0.00176612	0.00349863
FBti0019221	baggins{}485	0.000636748	0.000809987	0.00076949	0.000550125	0.000796455	0.00183945	0.000477172	0.000535371	0.00041976	0.000361984	0.000521726	0.000202771	0.000376025	0.000332561	0.000361822	0.000607866	0.000351725	0.000464486	0.000405165	0.000506115	0.000376314
FBti0019828	1360{}483	6.61691e-05	0.000529078	0.000398307	0.000132388	0.000331061	0.000132451	6.61151e-05	0.000264638	0.000463278	6.62048e-05	0.000331321	0.000132449	0.000264511	0.000330562	0.000661751	0.000330878	0.000128657	0.00046458	6.61628e-05	0.000396709	0.000198536
FBti0019827	HB{}482	0.000369748	0.00076551	0.000582925	0.000396307	0.000660695	0.000634394	0.000686115	0.000316882	0.000316991	0.000184974	0.000581869	5.28652e-05	0.000263941	0.000158328	0.00026413	0.000501851	0.000667573	0.000662255	0.000158449	0.000184732	0.000290558
FBti0019826	FB{}480	0.00055086	0.000804685	0.00100328	0.000856272	0.00106004	0.0025446	0.000508071	0.000220312	0.000330583	0.000110231	0.000220661	0.000169637	0.000296431	0.000220155	0.000305119	0.00301732	0.00327913	0.00369764	0.00344043	0.00382765	0.00322935
FBti0019224	blood{}488	0.00183446	0.0019863	0.00206427	0.00137636	0.00152558	0.00143077	0.00327787	0.00313961	0.00281423	0.00409256	0.00343421	0.00396143	0.00422817	0.00464827	0.00273541	0.00160325	0.00226945	0.00133441	0.00129309	0.00156057	0.00147521
FBti0019225	mariner2{}489	0.000157109	0.00109919	0.000157621	0.000157168	0.000471635	0.000157243	0.000156981	0.000157087	0	0.000157194	0.000786676	0	0	0	0	0.000628499	0.000305477	0.000472748	0.000471283	0.000313977	0.000314263
FBti0019830	G5{}492	0.000600711	0.00117814	0.000773234	0.00104313	0.00144038	0.00176964	0.000396373	0.000793278	0.000816227	0.000510313	0.000578875	0.000578525	0.000532373	0.000373708	0.000294716	0.00180231	0.00204951	0.00185304	0.00201729	0.00155159	0.00211979
FBti0019831	1360{}493	0	7.17105e-05	0	0	0.000143589	0	0	0	0	0	0	0	0	0	0	3.58774e-05	0	0	0	0	0
FBti0019228	roo{}495	0.000710818	0.00042627	0.00042788	0.000355542	0.000426769	0.000640282	0.000426143	0.000142143	0.000142193	0.000142241	0.000284737	0.000355706	0.000142075	0.000355105	0.000355442	0.000355445	0.000138209	0.000142592	0.000284301	0.000426163	0.000142184
FBti0019836	invader2{}499	0	0	0	0	0	0	0	0	0	0	0	0	0	0	0	0	0	0	0	0	0
FBti0019834	BS{}497	0.00016311	0.000311874	0.000270363	0.000198643	0.000283854	0.000305204	0.000177149	0.000127633	0.00013477	0.000170293	6.39174e-05	0.000127758	0.000233881	0.000106285	7.80162e-05	0.000191496	0.000137889	0.000128036	0.000177277	0.000141726	0.000134762
FBti0019833	Idefix{}496	0.00224516	0.00326507	0.00297945	0.00358884	0.00546797	0.00737134	0.00211276	0.00203104	0.00201986	0.000903302	0.000939802	0.000760899	0.00160268	0.00111568	0.00112862	0.00196025	0.00161681	0.00139405	0.00143724	0.00170928	0.00160391
FBti0019832	G5{}494	0.00125638	0.000289783	0.000290877	0.000773445	0.00145061	0.00125745	0.000193131	0.000193261	0.000289992	0	0.00029035	0.00019345	0.000386336	0	0.000483266	0.00106319	0.00122143	0.00106629	0.000966353	0.000965701	0.00144987
FBti0019227	S2{}491	3.75905e-05	0.00037571	0.000150852	0.000112814	0.000188075	0.000112868	3.75599e-05	0	0	0	3.76446e-05	0.000112866	7.5134e-05	0.000112675	0	3.75943e-05	0.000146179	0	0.000413457	0.00022537	0.000300767
FBti0019226	I{}490	4.24325e-05	0	0	0	4.24602e-05	4.24687e-05	4.23979e-05	0	4.24411e-05	0	8.49872e-05	0.000127404	4.2406e-05	0	0	8.48735e-05	0.000165009	0.000212802	0	0.0001696	4.24386e-05
FBti0019223	BS{}487	0	0	0	0	0	0	0	0	0	0	0	0	0	0	0	0	7.31794e-05	7.55004e-05	0	0	0
FBti0020314	Helena{}1246	0	0	0	0	0	0	0	0	0	0	0	0	0	0	0	0	0	0	0	0	0
FBti0019326	Doc{}1247	0.00173425	0.00179852	0.00179877	0.00287628	0.00243998	0.00285156	0.00173935	0.00177963	0.0014868	0.00259626	0.0026443	0.00242084	0.00187	0.00176534	0.00197566	0.00174095	0.00175573	0.00167409	0.00186447	0.00158959	0.001891
FBti0020316	gypsy3{}1250	0.000464427	0.000400707	0.00051771	0.000468571	0.000544171	0.000468795	0.00460478	0.00483014	0.00467697	0.00620761	0.00674586	0.00616574	0.0017177	0.00165781	0.00161572	0.00308458	0.00292515	0.00282681	0.00334594	0.00340714	0.00353332
FBti0020317	springer{}1251	0.000507124	0.000306672	0.000461746	0.000503051	0.000545834	0.000639777	0.00500324	0.005258	0.00483358	0.00671557	0.00699473	0.00680284	0.00185687	0.00158394	0.00156413	0.00322205	0.00379913	0.00325282	0.00360067	0.00367915	0.00368251
FBti0019327	H{}1248	7.11369e-05	0	0	0	0	0	0	0	4.74342e-05	0	0	0	0	0	0	0	0	0	0	0	0
FBti0019324	X{}1245	0.000302474	0.000215941	0.000390161	0.00025936	0.000259432	0.000908195	0.000129526	0.000432043	0.000172877	0.000259403	8.65455e-05	8.64932e-05	8.6367e-05	0	0	0.000259289	4.20085e-05	0.000260045	0	0.000431773	8.64335e-05
FBti0020313	HB{}1242	0	0	6.71092e-05	0	0	3.34742e-05	0	3.34409e-05	3.34525e-05	0	0	0	0	0	0	0	0	0	0	0	0
FBti0019323	pogo{}1244	0.00329422	0.00263401	0.00148723	0.00131818	0.000329637	0.000824258	0.000987462	0.000823438	0.000988468	0.0018128	0.00214433	0.00164849	0.00230451	0.00197484	0.00197671	0.000329455	0.000320258	0.000330416	0.000823478	0.00115209	0.00164735
FBti0019322	micropia{}1243	0.00215591	0.002485	0.00244944	0.000504167	0.00104784	0.00129465	0.000514758	0.000727864	0.00087374	0.00122141	0.000992584	0.000891104	0.000285409	0.000268558	0.000168008	0.000604834	0.000489959	0.000404398	0.00121503	0.00121981	0.00106971
FBti0020312	G4{}1241	0.00124433	0.001501	0.00176495	0.00158819	0.00176037	0.001546	0.00115757	0.00218799	0.00133042	0.00197483	0.00133206	0.00124537	0.00077186	0.000428712	0.000815326	0.00218852	0.00187715	0.00159238	0.00313198	0.00180075	0.00287524
FBti0019320	jockey{}1238	0.000812164	0.000854466	0.000680028	0.00113623	0.00111211	0.00131402	0.000622355	0.000604456	0.000537481	0.0011853	0.00139428	0.00114898	0.00127546	0.0014399	0.00142905	0.00140463	0.00178692	0.00138423	0.00151427	0.00142782	0.00158792
FBti0020311	G4{}1239	0.000758324	0.00156639	0.0018259	0.00161836	0.0020741	0.00126495	0.00131336	0.00146588	0.00121356	0.00156805	0.00151883	0.00131552	0.00293035	0.00111126	0.000707834	0.00171904	0.00211339	0.00253537	0.00217366	0.00202064	0.00257867
FBti0019321	Doc{}1240	0.00134587	0.00116818	0.00113706	0.00255103	0.00212645	0.00218004	0.0015925	0.00127485	0.00148784	0.00232111	0.00223452	0.00244586	0.00180517	0.00146857	0.00240862	0.00155853	0.00153224	0.00202489	0.00185925	0.00125636	0.00161173
FBti0019318	Rt1b{}1236	0.000476353	0.0013331	0.00090119	0.000217843	0.000749043	0.00177082	0.000108792	0.000326595	0.000503675	0.000163409	0.000204445	0.000272429	0.000448851	0.000353559	0.000217781	0.000503623	0.000595416	0.000423184	0.000408264	0.000312791	0.000449197
FBti0019319	S{}1237	0	0	0	0	0	0	0	0	0	0	0	0	0	0	0	0	0	0	0	0	0
FBti0020320	invader3{}1254	0.00367677	0.00392758	0.00393185	0.00300892	0.00288325	0.00342158	0.00777388	0.00918535	0.00767116	0.00566571	0.00693157	0.00635274	0.00430619	0.00395257	0.00398266	0.00263406	0.00283194	0.00334972	0.00717377	0.00708472	0.00627459
FBti0020321	Stalker2{}1255	4.66483e-05	7.38215e-05	5.07002e-05	9.72203e-05	3.8899e-05	8.94855e-05	0.000411724	0.000396454	0.00035771	0.000544524	0.00054112	0.000606934	8.15835e-05	2.71882e-05	4.66526e-05	0.000198275	0.000351467	0.000389908	0.000489761	0.00027579	0.000291594
FBti0020322	1360{}1257	0.000249075	0.000193625	0.000277652	0.000221483	0.000304624	0.000332384	0.000138262	2.76711e-05	0.000249126	0.00011076	0.000110859	0.000221585	0.000221262	0.000165908	0.000138388	0.000221422	0.000269052	5.5517e-05	0.000138362	0.000165923	0
FBti0019329	invader3{}1256	0	0	0	0.000202965	0	0.000203062	0.000202724	0.00030429	0	0.000304498	0	0	0	0	0	0.000101455	0	0	0.00020287	0	0
FBti0019334	Transpac{}1262	0.00127262	0.00133031	0.00127676	0.00244691	0.00231908	0.00278112	0.00406556	0.00452357	0.00454266	0.00272768	0.00238521	0.00203906	0.0010968	0.000927401	0.000554633	0.0027148	0.00224175	0.00203179	0.00281351	0.00403659	0.00301853
FBti0019335	G2{}1263	0.000747966	0.0016972	0.00101406	0.000131449	0.000455141	0.00125442	0.000323181	0.000404248	0.000788557	7.07918e-05	0.000242933	8.09286e-05	0.000141418	0.000212079	2.02171e-05	0.000343694	0.000176876	0.000334558	0.00018192	0.000212097	0.000131418
FBti0019333	297{}1261	0.000214991	0.000259647	0.000107846	0.000107536	0.000242023	0.000260003	1.79013e-05	9.85236e-05	5.37588e-05	0.000161331	0.000116621	0.000188274	0.000134286	0.000214807	0.000125423	9.85476e-05	0.000182884	0.000170715	9.85284e-05	0.000170071	6.27148e-05
FBti0019332	BS{}1260	0.000142993	0.000285838	0.000197256	0.000101325	0.000172896	0.000345861	7.73915e-05	0.000107229	0.000137063	0.000101342	0.000143199	0.000113297	8.93148e-05	2.97647e-05	7.15031e-05	4.17105e-05	8.10923e-05	8.96402e-05	0.00011915	9.52554e-05	7.15068e-05
FBti0019331	Cr1a{}1259	0.000142627	0.000199574	8.58548e-05	0.000256825	0.000199808	0.000142749	2.85021e-05	2.85213e-05	0.000199718	2.85408e-05	5.71329e-05	0	8.55226e-05	0	2.8528e-05	0	0.000110928	0	0.000114091	8.55104e-05	5.7059e-05
FBti0019330	1360{}1258	0.0001223	0.000152796	0.000122699	0.000152933	0.000244761	0.000336613	0.000152751	0.000366849	0.000397557	9.17749e-05	0.000183715	0.000306006	0.000488896	0.000366587	0.000366935	9.17345e-05	0.000118898	6.13346e-05	6.11445e-05	0.000152758	0.000214057
FBti0019336	F{}1264	0.00144217	0.000740188	0.00121224	0.000974801	0.0014041	0.00335492	0.00124626	0.00155887	0.00183231	0.00077997	0.00171748	0.000936239	0.000662202	0.000545217	0.000701658	0.00109148	0.000568398	0.00054733	0.0016369	0.00105158	0.000545762
FBti0019337	roo{}1265	0.000306094	0.000403431	0.000242973	0.000346587	0.00052844	0.000622809	0.000225182	0.000225333	0.000235505	0.000201929	0.000245901	0.000201988	0.000275648	0.000188204	0.000168199	0.00030276	0.000258338	0.000330633	0.000269068	0.000289053	0.000306137
FBti0019339	roo{}1267	0.000262741	0.00037034	0.000408913	0.000350452	0.000465153	0.000623699	0.000198578	0.000215551	0.000128028	0.000175255	0.000226013	0.000242732	0.000228913	0.000175011	0.000229077	0.000239186	0.000248883	0.000189203	0.000252612	0.000265905	0.000313313
FBti0019338	HMS-Beagle{}1266	0.00125114	0.00117025	0.00117467	0.000575607	0.000615937	0.000823646	0.000615034	0.000722482	0.000769576	0.00269777	0.00244558	0.0028124	0.00307575	0.00317532	0.0035062	0.000642362	0.000663457	0.000751607	0.000842937	0.00064849	0.00105058
FBti0019341	297{}1269	0.000177977	0.000315341	0.000292183	0.000210415	0.000259044	0.000259096	0.000137415	7.27982e-05	0.000129464	0.000161884	0.000194436	0.000202415	0.000169781	0.000161659	0.00012945	0.000161813	0.000102243	8.92567e-05	9.70691e-05	0.000137422	8.90011e-05
FBti0020325	1731{}pyd[1272]	0.050186	0.0427289	0.0514802	0.0160756	0.0213301	0.0223173	0.0395418	0.0367675	0.035165	0.0376829	0.041103	0.0437564	0.0378498	0.0329809	0.0217203	0.0124192	0.0147126	0.0127265	0.037224	0.0293943	0.0259602
FBti0019343	rover{}1275	0.000405067	0.000466825	0.000348331	0.00036387	0.000351563	0.000521244	0.000247798	0.000289292	0.000330734	0.000347388	0.000434625	0.000471593	0.00033046	0.000128024	0.000248023	0.000115745	0.000216991	0.000203144	0.000247977	0.000140425	0.000272839
FBti0020323	1360{}1270	0.00089449	0.000726396	0.00112175	0.00117446	0.00114681	0.00109109	0.000586531	0.000503078	0.000447336	0.000251711	0.000167958	5.59523e-05	0.000335224	0.000586506	0.000307509	0.00103436	0.000896782	0.000700927	0.000726704	0.000391038	0.000866661
FBti0019340	jockey{}1268	0.00104053	0.000724042	0.000858918	0.000619279	0.000566732	0.00109414	0.000289531	0.000237048	0.000303	0.000303102	0.000461656	0.000461378	0.000434379	0.000657998	0.000566415	0.000856215	0.000781095	0.000858711	0.000829709	0.000513283	0.000882599
FBti0020328	Stalker{}1277	0.000415263	0.000542104	0.00036135	0.000317923	0.000411294	0.000865163	0.000270971	0.000271154	0.000305154	0.000322215	0.000424348	0.000326551	0.000304901	0.000262493	0.000283931	0.000614482	0.000630285	0.000603522	0.000656732	0.000525031	0.000817932
FBti0019345	jockey{}1278	0.000168795	0.000590476	0	0	0.000168905	8.44694e-05	0	0.000168771	0.000168829	8.44431e-05	0.000169038	0.000168936	0	0	8.44052e-05	0.000168812	0.000328199	0	0.000253168	0.000421663	0
FBti0019346	pogo{}1279	0.00214125	0.00296326	0.00198297	0.00115341	0.000494456	0.00214307	0.00148119	0.00247031	0.0014827	0.0014832	0.00247422	0.00181333	0.00131686	0.00148113	0.00247089	0.000494183	0.000800646	0.000495623	0.000329391	0.000658338	0.000658939
FBti0019344	Rt1a{}1276	0.000218957	0.000621043	0.00037997	2.95999e-05	0.000213179	0.000538976	0.000177388	0.000201175	0.000254516	0.000130261	0.000148157	0.000136222	0.000177422	0.000236508	0.000153876	0.000100612	0.000184101	0.000166197	7.69237e-05	0.000141917	8.87792e-05
FBti0019347	mdg1{}1280	0.00133527	0.00139694	0.00136883	0.00158128	0.00129035	0.00129477	0.00157525	0.00165533	0.0014978	0.000761639	0.000708169	0.000678599	0.00118893	0.00133412	0.0010525	0.00291209	0.00205839	0.00160215	0.00109806	0.00125527	0.00123561
FBti0019348	flea{}1281	0.0197927	0.0129934	0.0167279	0.115333	0.117157	0.157934	0.0952974	0.0840504	0.0859501	0.0155672	0.0125796	0.0194433	0.0139844	0.0184914	0.0101805	0.0202211	0.0223928	0.0181353	0.0204913	0.0252316	0.0181139
FBti0019349	297{}1282	0.000191154	0.000356291	0.000222875	0.000180889	0.000217127	0.00028439	0.000118729	8.26493e-05	0.000175691	0.000149904	0.00020695	0.000155119	0.000227176	0.0001084	0.000191171	0.00021184	0.000110497	0.000212458	0.000134312	0.000201332	0.00017568
FBti0019352	I{}Sirt6-iso-1b	0.0025178	0.00310069	0.00302218	0.00430885	0.00387815	0.00289794	0.00152742	0.0022657	0.00222151	0.00107064	0.00100857	0.000755971	0.00302846	0.00228205	0.00374108	0.000503611	0.000533263	0.000829773	0.000575444	0.00100635	0.000737462
FBti0019353	297{}1286	0.000177165	0.000270037	0.000186629	0.000155077	0.000106368	0.000390095	0.000106212	7.97129e-05	9.74606e-05	0.000124083	0.000106452	0.000124119	0.000199186	0.000159312	0.000221477	0.000177183	0.000150707	0.000222124	0.000132861	0.000199157	0.000146182
FBti0019351	I{}Sirt6-iso-1a	0.00404218	0.00486682	0.00411797	0.00671346	0.00557529	0.00568574	0.00216759	0.00347983	0.00277859	0.00151468	0.00109405	0.000874714	0.00413323	0.00305633	0.00504148	0.000874072	0.00104692	0.000704426	0.000858297	0.00104486	0.00110825
FBti0019350	mdg3{}1283	0.00293598	0.00334494	0.00378632	0.00554102	0.00619234	0.00538258	0.00737555	0.00743045	0.00827126	0.00890154	0.00883728	0.00835424	0.00464248	0.00393162	0.00394645	0.00663852	0.00577335	0.00588966	0.0064208	0.00639429	0.00594495
FBti0019354	17.6{}1287	0.00210253	0.00258891	0.00268503	0.00392783	0.00435134	0.00438503	0.00247757	0.00272101	0.00259078	0.00147216	0.00207272	0.00137004	0.00189232	0.00147829	0.00155757	0.00197157	0.00184482	0.0023103	0.00292195	0.00319847	0.00302512
FBti0019355	Rt1b{}1288	0.000592578	0.000835102	0.000707464	0.0004446	0.000812361	0.00147678	0.000432229	0.000468069	0.000788289	0.000563253	0.000747723	0.000723548	0.000396779	0.000426291	0.00029039	0.000924514	0.000818053	0.00070135	0.00080583	0.000663177	0.000877141
FBti0019356	297{}1289	0.00026802	0.000295215	0.000268892	0.000240761	0.000279141	0.000251825	4.37226e-05	0.000103911	0.000125831	0.000147764	0.000202673	0.00016423	0.000191323	0.000202209	0.000224282	9.29957e-05	0.000127623	0.000137157	0.000169547	7.65181e-05	0.00019147
FBti0019357	roo{}1290	0.00032667	0.000319769	0.000334491	0.000286365	0.000377432	0.000674121	0.000161519	0.000121221	0.000192	0.000252717	0.000246198	0.000195492	0.000195206	0.000195161	0.000205451	0.000205452	0.000173525	0.000189162	0.000225617	0.000255751	0.000255984
FBti0020329	G5{}1291	0.000447245	0.000782273	0.000897403	0.000559265	0.000559421	0.00033572	0.00011172	0	0.000447336	0.000223743	0.000335916	0.000111905	0.000223483	0.000446862	0.000223643	0.00044729	0.000108701	0.000224297	0.000223601	0.000446901	0
FBti0019359	S{}1293	0	2.79894e-05	0	0	2.80222e-05	0	0	5.59998e-05	0	0	0	0.000168164	5.59728e-05	0	0	5.60134e-05	2.72249e-05	0.000196618	0.000140006	0	5.60158e-05
FBti0019358	BS{}1292	0.000131589	0.000245107	0.000174023	0.000233358	0.000221453	0.000401089	0.000137458	0.000179414	0.000155546	7.18145e-05	0.000215637	0.000149658	0.000143462	0.000161357	0.000143565	0.000137584	9.30388e-05	5.39941e-05	0.000113634	0.000143441	0.000155536
FBti0019360	pogo{}1294	0.000534186	0.000634919	0.000521441	0.000924343	0.00106907	0.00160392	0.00240909	0.00248289	0.00161732	0.00420357	0.00367239	0.00413256	0.00340511	0.0033899	0.00241128	0.0059777	0.00762146	0.00551725	0.00454737	0.0044866	0.00384091
FBti0019362	S{}1347	0.00020222	0.000252643	0.000101439	0.000303443	0.000151764	0.000101196	0.000101027	0.000101095	0.00010113	0.000101164	0	0.000101194	0.000101047	0	0	0	0	0.000101415	0	0	0
FBti0020379	invader1{}1345	0.000727702	0.00152738	0.000146014	0.0029847	0.00349525	0.00254913	0.0039991	0.00254659	0.00407596	0.000364048	0.000364375	0.000291324	0.000218174	7.2708e-05	0.000218331	0.00029111	7.07459e-05	0.000291959	0.000727634	0.000145429	0.000582245
FBti0020376	micropia{}1342	6.27793e-05	0.000125493	0	0.000125605	0	0.000188498	0.000250912	0	0	0	0	0	0	0	0	0	0.000122066	0	0	0	0
FBti0020375	invader1{}1341	0.000291081	0.000363663	0.000146014	0.0028391	0.00429625	0.00291329	0.00290844	0.00334695	0.00320254	0.000145619	0.00043725	0.0011653	0.000218174	0.000218124	0.000727769	0.000145555	0.000212238	0.000291959	0.00130974	0.000509	0.000582245
FBti0020372	micropia{}1338	0.000250883	0.000250753	0.000337507	0.000245273	0.000262458	0.000399473	0.000119642	0.000256548	0.000296559	0.000131214	0.000302635	0.000176906	7.97766e-05	5.12731e-05	3.99169e-05	0.000136859	8.31492e-05	6.8629e-05	0.000239457	0.000262085	7.41352e-05
FBti0020371	invader1{}1337	0.00065338	0.000725602	0	0.00210612	0.00246994	0.00225245	0.00362693	0.00341161	0.00297712	0	0.000508916	0.000799242	0.000145105	0.000145071	0.000145209	7.26051e-05	0.000282313	0.000291267	0.000217773	0.000290168	0.000653474
FBti0020368	invader1{}1334	0.000583548	0.0013123	0.000292724	0.00328369	0.00306563	0.00306624	0.00378997	0.00364665	0.00255354	0.000437898	7.30485e-05	0.000803048	0.000145796	0.000145762	0.0001459	7.29508e-05	0.000709144	0.000292654	0.000510556	0.000218662	0.000583632
FBti0020365	invader1{}1331	0.000178637	0.000178545	0	0.00116158	0.0011619	0.00116213	0.00142793	0.00125028	0.00214408	0	0.000178894	0.000357572	0	0	0.000178654	0.00035731	0	0.000179176	0.00026793	0.00044625	0.000267994
FBti0020362	invader1{}1328	0	0	0	0.00014664	0	7.3355e-05	0	0	0	0	0	7.33537e-05	0	0	0	0	0	0	0	0	0.000146606
FBti0020359	micropia{}1325	0.000448117	0.000209013	0.000359661	0.000254028	0.000224205	0.000313949	0.000164176	0.000104546	0.000149403	0.000194289	0.000194464	0.000388692	0.000119423	5.96978e-05	8.96316e-05	0.000149387	0.000101652	7.49114e-05	0.000343524	0.000238812	0.000149394
FBti0020358	invader1{}1324	0.00065338	0.000290241	0.000437005	0.00167037	0.0030511	0.00138053	0.001886	0.00333902	0.00341279	0.000145274	0.000145405	0.000726584	0	0.000145071	0.000363022	0.00029042	0.000141157	0.0004369	0.000145182	0.000435252	0.000217825
FBti0020355	invader1{}1321	0.000364718	0.00116649	0.000146362	0.00306477	0.0024817	0.00343127	0.00371709	0.00240679	0.00240763	0.00051088	0.000292194	0.000730044	7.28979e-05	7.28811e-05	0.000291801	0.000364754	0.000354572	0	0.000583493	0.000728874	0.00036477
FBti0020352	invader1{}1318	0	8.95333e-05	0	0.00161304	0.00161349	0.000896561	0.0013426	0.00214961	0.00250874	8.96282e-05	8.97087e-05	0.000448272	0	0	0	8.95887e-05	0	0.00026955	0.000179143	0.000358043	0.000268778
FBti0020349	invader1{}1315	0	0	0	0.000145942	0.00065692	0.000803063	0.000655957	0.000510531	0.00043775	0	0	7.30044e-05	0	0	0.0001459	0.000218852	0	0	0	7.28874e-05	0.000218862
FBti0020345	Dm88{}lncRNA:alphagamma-element:CR32865[1311]	0.000650771	0.0006004	0.000200889	0.00150234	0.00140257	0.00185377	0.00165061	0.00140146	0.00185257	0.000100173	0.000401051	0.000651313	0.000100056	0	0.000100128	0.000100129	0.000438001	0.000301261	0.000400436	0.000550229	0.000400532
FBti0020335	invader1{}1301	0	0	0	0	0	0.0003194	0	0	0	0	0	0	0	0	0	0	0	0	0	0	0
FBti0019361	1360{}1299	0.000193725	5.53214e-05	0.000166591	0.000110742	0.000193852	0.000138493	0.000248872	0.000221369	0.000249126	0.00016614	0.000304864	5.53963e-05	0	5.53027e-05	5.53552e-05	5.53556e-05	0.000188336	0.000111034	0.000138362	5.53075e-05	5.5358e-05
FBti0020332	invader1{}1297	0.000511823	0.000438478	0.000146711	0.00219435	0.00219496	0.0025613	0.00270315	0.00241253	0.00329096	0.000219471	0.000439337	0.000731786	0	0	0.000292497	0.000438749	0.000284334	0.000440028	0.000584886	0.00051143	7.31281e-05
FBti0020330	Dm88{}1295	0.000476972	0.000403382	0.000110429	0.000403743	0.000403855	0.000660986	0.000293282	0.000440219	0.000660557	7.342e-05	0.000183715	0.00047737	0.000110002	0.000146635	0.000330242	0.000293551	0.000178348	0.000257605	7.33734e-05	0.000146648	0.000623822
FBti0019363	roo{}1348	0.00100212	0.000429258	0.000574505	0.000859282	0.000644641	0.000501488	0.000500652	0.00014314	0.000143189	0	0.000430099	0.000501479	0.000500747	0.000500632	0.000286347	0.000214762	0.000139178	0.000287184	0.000715733	0.0005722	0.000429542
FBti0019365	pogo{}1350	0.000924869	0.000389977	0.000521933	0.00109869	0.00128698	0.00127278	0.00180491	0.00225404	0.00170557	0.00456901	0.00424026	0.00468605	0.0032639	0.00317651	0.00316507	0.00546305	0.00840135	0.00518908	0.0049418	0.00425979	0.0041625
FBti0019366	mdg3{}1351	0.00340218	0.00356128	0.00461597	0.00599074	0.00666441	0.00580475	0.00849575	0.00859024	0.00799925	0.00989553	0.0094709	0.00857643	0.00487544	0.00466914	0.00403526	0.00814829	0.0069604	0.00661891	0.00633756	0.00740916	0.00709398
FBti0019364	copia{}1349	0.0216508	0.0185032	0.0190808	0.466286	0.456114	0.416347	0.48442	0.474589	0.435934	0.0441591	0.0454213	0.0519672	0.0311229	0.0271832	0.0268278	0.0330333	0.0399899	0.0326339	0.06965	0.0535975	0.0595364
FBti0019367	Doc{}1352	0.00264766	0.00287978	0.00283857	0.00343416	0.00333771	0.00374106	0.00257418	0.00301063	0.00316745	0.00353212	0.00374325	0.00374099	0.00299621	0.0027621	0.00334882	0.00309573	0.0028516	0.00223256	0.00343255	0.00226305	0.00318024
FBti0019368	I{}1353	0	0	0.000189729	0	0	0	0.000188959	0.000378171	0.000472878	0.000189215	0.000189385	0.000378541	0.000188994	0	0	0	0	9.48415e-05	0	0	0
FBti0019369	jockey{}1354	0.000504624	0.000661275	0.00059627	0.00112181	0.0013241	0.00170596	0.000571441	0.000594249	0.000370133	0.00152591	0.00192033	0.00150391	0.00105344	0.00123247	0.00149158	0.00199627	0.00215858	0.00214831	0.00188375	0.00135583	0.00198514
FBti0019370	S{}1355	0	0	0	0	0	0	0	0	0	0	0	0	0	0	0	0	0	0	0	0	0
FBti0019371	Rt1b{}1356	0.000581886	0.00117771	0.00074432	0.000305604	0.000771502	0.00139772	0.000421523	0.000538167	0.000727505	0.0005822	0.000364202	0.000480456	0.000392527	0.000421506	0.000232776	0.000741978	0.000820263	0.000525276	0.000741834	0.000581438	0.000800207
FBti0019372	S{}rdx[S1357]	0.00062594	0.000834154	0.00081986	0.000434843	0.000434964	0.00114853	0.000295342	0.000312925	0.000539113	0.00015657	0.000296008	0.000139214	0.000503914	0.000416936	0.000382554	0.000782503	0.00108183	0.00158701	0.000625881	0.000382225	0.000765147
FBti0019373	F{}1358	0.000685887	0.00124701	0.000733995	0.000666539	0.000869357	0.00148409	0.000646166	0.000640069	0.000542287	0.000405219	0.000595291	0.000444564	0.000372106	0.000424233	0.00022865	0.000685955	0.000616002	0.00057002	0.000489873	0.000522179	0.000574921
FBti0019374	roo{}1359	0.000252719	0.00029637	0.000199453	0.000350568	0.000347294	0.000600298	0.000205377	0.000161717	0.000168514	0.00016857	0.000246334	0.000202344	0.000168374	0.000171702	0.000128056	0.000326883	0.000209654	0.000162228	0.000208895	0.000198653	0.000276346
FBti0019376	jockey{}1361	0.000405355	0.000533085	0.000406675	0.00078967	0.00091798	0.00108898	0.000383707	0.000383965	0.000597486	0.00123807	0.00228607	0.00155871	0.00157776	0.00185451	0.00138687	0.00132287	0.00153483	0.000898749	0.00142927	0.000831404	0.00123758
FBti0019375	Idefix{}1360	0.00118988	0.0018806	0.00128463	0.00166398	0.00238543	0.00363037	0.00123416	0.00158902	0.00133425	0.000580842	0.000832876	0.000716995	0.000888764	0.000658192	0.000597052	0.00106235	0.00108073	0.00123063	0.00138737	0.0013165	0.00135888
FBti0019378	BS{}1363	0	0	0.000238264	0	0	0	0	0	0	0	0	0	0	0	0	0	0	0	0	0	0
FBti0019379	pogo{}1364	0.0029648	0.00214013	0.00297446	0.00115341	0.00164819	0.000989109	0.00164577	0.00164688	0.000658979	0.001648	0.00296907	0.00263758	0.00213991	0.00181027	0.00181199	0.000329455	0.00176142	0.00115645	0.00115287	0.000658338	0.000329469
FBti0019382	F{}1367	0.000737359	0.000867415	0.000811772	0.000613608	0.000816195	0.00160006	0.000651998	0.000384937	0.000515603	0.000509248	0.000503171	0.000346129	0.000391273	0.000358584	0.000208829	0.000495972	0.000596315	0.000543233	0.000456728	0.000436859	0.000561256
FBti0019381	Juan{}1366	0.000143208	0.000184029	0.000205249	0.000163727	0.00012283	0.000307136	0.000235078	0.000225009	0.000317168	0.00229257	0.00220243	0.00193492	0.00182987	0.0020032	0.00153451	0.000296675	0.00047734	0.000338579	0.000470496	0.000603055	0.000583144
FBti0019380	412{}1365	0.000485209	0.000531752	0.000491059	0.000604609	0.000796433	0.000783812	0.00196052	0.00174054	0.00154958	0.00207816	0.0019692	0.00183596	0.000557216	0.000476289	0.000421404	0.000293709	0.000335163	0.00031591	0.000293652	0.000412536	0.000481022
FBti0019377	Doc{}1362	0.00180457	0.00176227	0.00192671	0.00250912	0.00310621	0.00292457	0.00181964	0.00217676	0.00177182	0.00253439	0.00272733	0.00247714	0.00205989	0.00190227	0.00264087	0.00190409	0.00208432	0.00167716	0.00194511	0.00139788	0.00198697
FBti0019384	blood{}1369	0.00140439	0.00161008	0.0018275	0.0011198	0.00118211	0.00100871	0.00214201	0.00222192	0.0019748	0.00371124	0.003061	0.00360898	0.00319504	0.00372669	0.00239594	0.00151606	0.0019757	0.00123461	0.00114818	0.00114328	0.00102039
FBti0019383	412{}1368	0.000590974	0.000590668	0.000588781	0.000459819	0.000595467	0.000648983	0.00240708	0.00212146	0.00220019	0.00215576	0.00242895	0.00247677	0.000787473	0.000713483	0.000529463	0.000197011	0.000163583	0.000185236	0.000168248	0.000205042	0.000221647
FBti0019385	F{}1370	0.000678486	0.00099764	0.000765783	0.000496003	0.000907415	0.00198496	0.000430227	0.000495746	0.000632948	0.000372064	0.000509597	0.000424408	0.000286872	0.000247696	0.000241407	0.000782947	0.000558134	0.000582378	0.000541433	0.000514992	0.000521987
FBti0019386	invader4{}sra[invader4.1371]	0.000529734	0.00114716	0.000177153	0.0240236	0.0213799	0.0183798	0.0156144	0.0166842	0.0152771	0.000618357	0.00123782	0.00123708	0.000264701	0.000176427	0.000971268	0.00105957	0.00103	0.00230243	0.00335466	0.00220553	0.00105962
FBti0019387	diver{}1372	0.000279738	0.000479302	0.000305707	0.000369792	0.000429878	0.00081993	0.000494133	0.000519438	0.00044967	0.00060476	0.000490246	0.000529945	0.000379406	0.000234579	0.000299746	0.0010741	0.00123837	0.000856775	0.000874098	0.00101327	0.000824345
FBti0019388	BS{}1373	0	8.43537e-05	0.000254017	0.000337716	8.44525e-05	0.000506816	0	0.000168771	0.000168829	0	0	0.000168936	0.000168689	0.00016865	0	0	0	8.46519e-05	0.000506337	0.000168665	0.000253229
FBti0019389	F{}1374	0.000574943	0.000779876	0.000556215	0.000534076	0.000924619	0.00147969	0.000820678	0.000862292	0.000924204	0.000657433	0.000411265	0.000452118	0.000554063	0.000348774	0.000246427	0.000739287	0.000818462	0.000535486	0.000410635	0.0010259	0.000677709
FBti0019390	412{}1375	0.000339449	0.000470077	0.000373379	0.000347758	0.000364225	0.000421603	0.00151606	0.00163975	0.00138671	0.00177182	0.00160139	0.00162089	0.000531334	0.000351417	0.000302669	0.000171786	0.000242535	0.000213308	0.000114502	0.000171637	0.000208607
FBti0019391	blood{}1376	0.00172016	0.00186805	0.00170502	0.00122028	0.00117097	0.00109257	0.00251204	0.00240623	0.00207206	0.00391797	0.00318026	0.00350527	0.00377703	0.00427194	0.00269214	0.00168725	0.00228335	0.0013106	0.00115356	0.00131392	0.00123654
FBti0019392	F{}1377	0.000168795	0	0.000508034	0	0.000168905	0.000422347	8.43287e-05	0.000506312	0.000337658	0.000337772	0.000422595	0	8.43446e-05	0.000252976	0	0	0	0.000169304	0.000168779	8.43326e-05	0.000168819
FBti0019393	roo{}1378	0.00120004	0.00119942	0.00127477	0.000776786	0.000423819	0.00155431	0.000634797	0.000635223	0.000282419	0.000353143	0	0.000706494	0.00077601	0.00042318	0.000282388	0.00028239	0.000617641	0.000495623	0.000776422	0.000916971	0.000635405
FBti0019395	H{}1380	0.00143812	0.00193827	0.00203304	0.00170023	0.00244204	0.00274784	0.00237314	0.00211329	0.00228838	0.000545036	0.0012438	0.00157017	0.00246069	0.00200293	0.00122033	0.000261502	0.000296569	0.000240409	0.000174301	0.000217729	0.000283306
FBti0019394	roo{}1379	0.00028632	0.000572344	0.000574505	0.000572855	0.000286507	0.000358205	0.000500652	0.000644128	0.000143189	0.000644569	7.16831e-05	0.000644758	0.000143071	0.000214556	0.000572693	0.000286349	0.000417533	0.000215388	0.000143147	0.00042915	0.000501132
FBti0019396	opus{}1381	0.000900949	0.000888421	0.000807038	0.000571351	0.000543337	0.000696415	0.000860026	0.000908862	0.000804582	0.0012113	0.00133323	0.000954031	0.000639112	0.000711301	0.000860807	0.000394204	0.000230702	0.000330806	0.000679669	0.000659116	0.000752239
FBti0019397	F{}1382	0.000899264	0.0011235	0.000922696	0.0008996	0.00120662	0.00165687	0.000816846	0.000694786	0.000899446	0.000286284	0.000757287	0.000654555	0.0004902	0.000245044	0.000367914	0.000899353	0.000894117	0.000778978	0.000837871	0.000673929	0.000919833
FBti0020381	hopper{}1383	0.000170676	0.000298527	0.000278251	0.000149397	0.000192135	0.000170821	8.52683e-05	6.39942e-05	4.26776e-05	0.000234806	0.000170921	0.000149466	8.52844e-05	4.26324e-05	8.53456e-05	0.000448068	0.000456301	0.000385178	0.000298654	0.000319771	0.00042675
FBti0019398	F{}1384	0.000642874	0.00111521	0.000637554	0.000561801	0.000946455	0.00161965	0.0005316	0.000620617	0.000761259	0.000450994	0.000532799	0.000421545	0.000384006	0.00031747	0.000214311	0.000546867	0.000589072	0.000444698	0.000502429	0.000694065	0.000583843
FBti0019399	S2{}1385	0.000482461	0.000964422	0.00080672	0.000884843	0.000724164	0.00064383	0.00112482	0.000884385	0.000804265	0.000321814	0.000161052	0.000321909	0.000883958	0.000883755	0.00064334	0.0008846	0.000625387	0.000403263	0.000402013	0.00104453	0.00096506
FBti0019400	Bari1{}Cyp12a4[Bari1-1386]	0.000369748	0.000580732	0.00044161	0.000158523	0.000211423	0.000440552	0.000175927	0.000176045	0.000246549	0.000105699	0.000176324	0.000352435	0.000369517	0.000246288	0.000140869	0.000211306	0.000359462	0.000300222	0.000211265	0.000316683	0.000457849
FBti0019401	F{}1387	0.000570817	0.00114104	0.00105111	0.000585487	0.00103393	0.00150419	0.00060645	0.000476817	0.000635977	0.000310866	0.000564403	0.000318189	0.000505471	0.000317651	0.000195107	0.000513064	0.000653282	0.000492818	0.000599663	0.000454859	0.00050586
FBti0019402	roo{}1388	0.000299695	0.000356755	0.000270266	0.0003436	0.000316739	0.0007246	0.000181689	0.000191912	0.000266076	0.000181936	0.00029001	0.0001921	0.000195185	0.000255701	0.000134707	0.000235739	0.00027499	0.000226294	0.000232326	0.00022544	0.000191967
FBti0019403	blood{}1389	0.00190572	0.00193779	0.00191608	0.00126544	0.00120788	0.00148119	0.00267245	0.00279824	0.00253459	0.00455801	0.00385005	0.00418699	0.00438332	0.00495642	0.00294774	0.00169093	0.00223049	0.00136415	0.00117805	0.00156967	0.00127342
FBti0019404	Rt1a{}1390	0.000136161	0.000650868	0.000427632	5.92227e-05	0.000189565	0.000396982	0.000153796	7.10304e-05	0.000254614	0.000130312	0.000266786	0.000195525	0.000183407	0.000195195	0.000171697	5.92065e-05	0.000109352	0.000100944	7.10339e-05	0.000136057	6.51299e-05
FBti0019408	Burdock{}1394	0.000372565	0.000420111	0.000392946	0.000482604	0.000511416	0.000631031	0.000434304	0.000491906	0.000482522	0.000415777	0.000813168	0.000678824	0.00110745	0.00098311	0.000921943	0.000119424	0.000134664	8.14448e-05	0.000157609	0.000105002	0.000181532
FBti0019407	F{}1393	0.000837812	0.00146757	0.000771217	0.000665316	0.000959359	0.00152145	0.000604114	0.000639064	0.000578812	0.000561724	0.000536279	0.000319844	0.000379801	0.000431492	0.000190037	0.000872448	0.000579391	0.000641083	0.000725459	0.000638664	0.000630608
FBti0019406	roo{}1392	0.00035303	0.000406614	0.000242866	0.000433885	0.000413819	0.000679741	0.00012094	0.000141192	0.000215224	0.000232116	0.000235692	0.00020863	0.000194885	0.000164606	0.000158037	0.000232014	0.000254956	0.000212457	0.000329464	0.000295645	0.0002522
FBti0019405	copia{}1391	0.0220429	0.0198485	0.0200847	0.479946	0.473546	0.438148	0.5129	0.510281	0.464763	0.0427639	0.0434102	0.0546588	0.0314259	0.027637	0.0266039	0.0322582	0.0377565	0.0316001	0.0659915	0.0535663	0.057734
FBti0019409	roo{}1395	0.000715801	0.000429258	0.000789945	0.000429641	0.000143254	0.000501488	0.000214565	0.000286279	0.000357973	0.000716188	0.000143366	7.16398e-05	0.000500747	0.000429113	0.000572693	0.000214762	0.000278355	0.000287184	0.000286293	0.000500675	0
FBti0019410	BS{}1396	0.000739213	0.000246277	0.000412011	0.000164331	0.000410942	0.00102756	0.000123102	8.2123e-05	0.000205379	0	0.000164506	0.000123305	0.000205208	0.000164129	0.000410712	0	3.9925e-05	8.23824e-05	0	4.10358e-05	0
FBti0019411	opus{}1397	0.000798603	0.0011568	0.000568971	0.000231566	0.000289538	0.000718197	0.000659178	0.000810061	0.000775613	0.00158649	0.00107793	0.00107728	0.000717137	0.000670715	0.000787101	0.000300953	0.000247544	0.000464354	0.000590216	0.000705469	0.000671386
FBti0019412	Doc{}Ir93a[iso-1]	0.00144094	0.00183593	0.00188844	0.00281803	0.00273438	0.00317018	0.00177053	0.00173927	0.00168793	0.00257172	0.00272353	0.00241007	0.00236764	0.00165372	0.0024732	0.00148004	0.0019814	0.00160154	0.00162253	0.00158901	0.00183714
FBti0019413	Tirant{}1399	0.000134529	9.8119e-05	0.000102137	9.09321e-05	0.000138255	0.000229258	0.00015985	0.000138145	0.000149103	2.54652e-05	4.36938e-05	2.91116e-05	0.000232553	0.000119883	0.000101815	0.000294539	0.000516078	0.000536092	0.000352651	0.000239786	0.000360008
FBti0020383	NOF{}1401	0	0.000209729	0	0	0	0	0	0	0	0	0	0	0	0	0	0	0.000408	0	0	0.000419352	0
FBti0019414	mdg1{}CG42335[iso-1]	0.000952293	0.00121897	0.00122357	0.00118663	0.00128309	0.00134187	0.00161508	0.00149923	0.00150393	0.000643563	0.000610679	0.000464003	0.0013858	0.0011184	0.001132	0.00222224	0.00153082	0.0014914	0.00104826	0.00119362	0.000885592
FBti0019416	roo{}1405	0.000353941	0.000326545	0.000320949	0.000381309	0.000463147	0.000684641	0.000159824	0.000159931	0.000251894	0.000187281	0.000303327	0.000200961	0.00023808	0.000265228	0.00021783	0.0002825	0.000234911	0.000238947	0.000214386	0.000187036	0.000268897
FBti0019415	pogo{}SKIP[pogo1404]	0.000848315	0.0006783	0.000875393	0.00164877	0.00189176	0.00194066	0.00215538	0.00295656	0.00286061	0.00637792	0.00558266	0.00613722	0.00297935	0.00467384	0.00358749	0.00724775	0.0105564	0.00748768	0.00722211	0.00661177	0.00484821
FBti0020385	FB{}CG34376[FB]	0.00165184	0.00190041	0.00178837	0.000832173	0.00128428	0.00287832	0.000653073	0.000677276	0.000534877	0.000368595	0.000725951	0.000451959	0.000593815	0.000629299	0.000511048	0.000915139	0.00129395	0.00174026	0.00112885	0.00169807	0.00127174
FBti0019417	Doc{}1407	0.00150656	0.00136278	0.0014017	0.0022649	0.00215605	0.0023418	0.00149693	0.00164099	0.00158263	0.00228212	0.0020566	0.00185319	0.00180843	0.0015305	0.00214642	0.00183499	0.00180013	0.00162085	0.00174206	0.00136243	0.0015657
FBti0019418	1360{}1408	0.000166804	0.000111145	0.000334694	0.000695275	0.0008902	0.000612135	0.000361113	0.000694916	0.000500513	0.000333788	0.000167044	0	8.33497e-05	0.000111107	0.000139016	0.000222427	0.000243245	0.000390382	0.000305778	2.77792e-05	0.000111218
FBti0019420	roo{}1410	0.000644221	0.000643887	0.000143626	0.000214821	0.000787895	0.000143282	0.000143043	0.000286279	7.15946e-05	7.16188e-05	0.000143366	0	0.000143071	0.000429113	7.15866e-05	0	0.000347944	0.00035898	0.000143147	0.0002861	0.000286361
FBti0019419	Bari1{}1409	0.000319128	0.000850566	0.000480251	7.09438e-05	0.0003903	0.000780755	0.000212579	0.000212721	0.000336926	0.000567645	0.000390606	0.000159697	0.000265773	0.00021257	0.000124117	0.000230504	0.00022407	0.000426787	0.000124094	0.00024802	0.000248246
FBti0019421	roo{}1411	0.000272906	0.000282867	0.000381961	0.000370752	0.00042817	0.000610348	0.000168323	0.000195386	0.000202194	0.000182036	0.000266551	0.000219182	0.000208761	0.000178416	0.000151629	0.000215651	0.000199805	0.000331179	0.000252667	0.000168331	0.000229139
FBti0019422	opus{}1412	0.000804735	0.000780189	0.000662032	0.000382392	0.000342236	0.000467144	0.000683468	0.00080462	0.000603674	0.00111919	0.000979161	0.00100676	0.00062328	0.000675399	0.000684088	0.000281686	0.000305116	0.0003269	0.000607518	0.000635252	0.000712293
FBti0019425	flea{}1415	0.020412	0.0131474	0.0178635	0.121638	0.124702	0.162946	0.0977195	0.0934703	0.0951511	0.0172227	0.0144202	0.0230193	0.0150554	0.0208031	0.011434	0.0212198	0.024461	0.0193286	0.0218688	0.028173	0.020244
FBti0019424	H{}1414	0.00137275	0.00152449	0.00161769	0.00154765	0.0016571	0.00281326	0.00217719	0.00204794	0.00215762	0.000523235	0.00102559	0.00115582	0.00204695	0.00156751	0.00180871	0.000261502	0.000233019	0.00032783	0.000239664	8.70917e-05	0.000239721
FBti0019423	jockey{}1413	0.000168795	0	0.000169345	0	0.000168905	0	0	0.000337541	0	8.44431e-05	0.000169038	0	0	0.00016865	0	0	0.000164099	8.46519e-05	0	0	0
FBti0019426	BS{}1416	0	0	0	0	0	0	0	0	0	0	0	0	0	0	0	0	0	0	0	0	0
FBti0019427	pogo{}1417	0.000662406	0.000496547	0.000498422	0.000331327	0.00016571	0.000165743	0.00115827	0.000662311	0	0.00347951	0.00215592	0.00298331	0.00115849	0.00198552	0.00248425	0.00132494	0.00112696	0.00199321	0.00132469	0.00148927	0.00248438
FBti0019429	Doc{}1419	0.0014459	0.00196359	0.00186042	0.00250371	0.00256929	0.00297863	0.00159373	0.00176984	0.00164724	0.00219273	0.00278558	0.00267358	0.00227441	0.00185928	0.00249003	0.00204911	0.00186584	0.00164536	0.00206816	0.00148366	0.00199732
FBti0019428	Doc{}1418	0.00139196	0.00133823	0.00131669	0.00281148	0.00234797	0.00310472	0.00158951	0.00155081	0.00163091	0.00192326	0.00278792	0.0023882	0.00211975	0.00141725	0.0021743	0.00152467	0.00163677	0.0012233	0.00185577	0.00144387	0.00186946
FBti0019430	Doc{}CHKov1[Doc1420]	0.0349102	0.0343089	0.0348265	0.0429177	0.0349533	0.0331406	0.0498145	0.0502279	0.0442335	0.0505948	0.056347	0.0517028	0.0426782	0.0362088	0.047207	0.0384688	0.0349151	0.0335933	0.0386648	0.0353985	0.0401802
FBti0019432	roo{}alpha4GT2[1]	0.000295484	0.000392655	0.000299814	0.000352698	0.000483834	0.00069229	0.000184527	0.000211509	0.000198149	0.000225092	0.000208481	0.000272206	0.00022483	0.000228133	0.000188052	0.000188054	0.00023177	0.000195338	0.000255166	0.000261704	0.000322392
FBti0019431	roo{}1421	0.000265905	0.000316229	0.00037483	0.000299676	0.000397434	0.000626588	0.000188336	0.000215386	0.000222194	0.000229004	0.000330331	0.000192015	0.000225373	0.000171513	0.00016831	0.000296227	0.000242147	0.000165426	0.000225493	0.000198434	0.000286141
FBti0019433	Tirant{}1423	0.000114971	0.000172368	0.000180228	0.000122203	0.000100666	0.000323633	0.000140007	0.000176025	0.000104214	4.67324e-05	5.39704e-05	1.43834e-05	0.000208255	0.000179489	0.000172473	0.000398847	0.000618245	0.000414424	0.000319734	0.000172324	0.000294656
FBti0019434	297{}1424	0.000291724	0.000286367	0.000266543	0.000156339	0.000234574	0.000297187	6.76666e-05	0.000130215	0.000161523	0.000145941	0.000104337	0.000161625	0.000275924	0.000140532	0.000255282	0.000177136	0.000126611	0.000130627	0.000182311	0.000171777	0.000171934
FBti0019436	roo{}1426	0.000326678	0.000442147	0.000327742	0.000265525	0.000435855	0.00074587	0.000214208	0.000200742	0.000211022	0.000255355	0.000190836	0.000258836	0.000156435	0.000237999	0.000153144	0.000262049	0.000258042	0.000187724	0.000214362	0.000299225	0.000187186
FBti0020386	Stalker{}1427	0.0003336	0.000489589	0.000406707	0.00046468	0.000447907	0.000912898	0.000240502	0.000244886	0.000282984	0.000240829	0.000376368	0.000270483	0.000333391	0.000232054	0.000228051	0.000781293	0.000903169	0.00078357	0.000890923	0.000561198	0.000933368
FBti0019435	roo{}1425	0.000296198	0.000423881	0.000253263	0.000343449	0.000417642	0.000801763	0.000184973	0.000161539	0.000218827	0.000185224	0.000273029	0.000252652	0.000242192	0.000255588	0.000235633	0.000252467	0.000268325	0.000192434	0.000346653	0.000312786	0.000215447
FBti0019437	jockey{}1428	9.48491e-05	0	0	0	0.000189822	0	0	9.48355e-05	0	0.000284701	0.000379943	0.000189857	0.00018958	0	0.000284574	0.000189717	0	0	0.00018968	0.000284329	0
FBti0019439	roo{}1430	0.000347641	0.000414929	0.000294595	0.000398417	0.00042217	0.000820862	0.000138269	0.000256475	0.000232933	0.000158718	0.000253501	0.000152009	0.000131549	0.000158496	0.000162022	0.00020928	0.000150938	0.000199735	0.000263237	0.000178746	0.000286929
FBti0019438	roo{}1429	0.000858961	0.000500801	0.00100538	0.000358034	0.000644641	0.000143282	0.000214565	0.000572558	0	0.000286475	0.000430099	0.00014328	0.000357676	0.000214556	0.000715866	0.000143174	0.000278355	0.000430775	0.000143147	0.00042915	0.000286361
FBti0019440	412{}1431	0.000863965	0.00107027	0.000809807	0.000787192	0.000986293	0.000917477	0.00295859	0.00251447	0.00260054	0.00257706	0.00275811	0.00263059	0.00130932	0.00124823	0.00103442	0.000263678	0.000374617	0.000390567	0.000214957	0.000182387	0.000271802
FBti0019441	Tirant{}1432	0.000158104	0.000208302	0.000183854	9.70548e-05	0.000107869	0.000392001	0.000165156	8.9819e-05	0.000115008	2.15713e-05	5.39767e-05	5.75404e-05	0.000204689	0.000165149	0.000165306	0.000323427	0.000663731	0.000558637	0.000409595	0.00021184	0.00037016
FBti0020388	roo{}1434	0.000325181	0.000239763	0.000288802	0.000309304	0.000458751	0.000704269	0.000159795	0.000159902	0.00022394	0.000224016	0.000186848	0.000117376	0.00019179	0.000191746	0.00012262	0.000287894	0.000259127	0.000278039	0.00031982	0.00026101	0.000282574
FBti0019442	I{}1436	0.00224168	0.00330091	0.00279262	0.00440515	0.00425227	0.00363085	0.00206317	0.0026748	0.00245893	0.00092455	0.000913956	0.000588004	0.00306114	0.00220556	0.00336568	0.000576163	0.000576716	0.000703709	0.00078708	0.000826446	0.00086143
FBti0019443	Rt1b{}CG34353[Rt1b1437]	0.000498151	0.000975869	0.000869605	0.000518271	0.000588202	0.00135613	0.000348421	0.00056781	0.000548077	0.00030902	0.000608619	0.000319082	0.000288747	0.000318544	0.000189315	0.000886797	0.000542408	0.000599583	0.000388521	0.000657053	0.000378649
FBti0019445	297{}1440	0.000310828	0.00025816	0.000259135	0.000223354	0.000232178	0.000503883	5.68658e-05	0.000135694	0.000183908	0.000254053	0.000140293	0.000166498	0.000284383	0.000236202	0.000175131	0.00017951	0.000148963	0.000127341	0.000192608	0.000113737	0.000218924
FBti0019444	Transpac{}1439	0.0015178	0.00168622	0.00179215	0.0031185	0.00307848	0.00437033	0.00536631	0.00556253	0.00510319	0.00332929	0.00320951	0.0026759	0.00127766	0.00109072	0.000782324	0.00336869	0.00332006	0.00273443	0.00359569	0.00541322	0.00416872
FBti0020390	hopper{}1438	0.000300988	0.000365296	0.000560798	0.000430144	0.000817501	0.000817664	0.000515559	0.000214961	0.000494581	0.00105403	0.000452132	0.000796132	0.000214857	0.000128884	0.000365519	0.00120407	0.00058523	0.0010782	0.000988867	0.00146082	0.00137614
FBti0019446	I{}1441	0.00223027	0.00352325	0.00283841	0.00461628	0.00398971	0.00368223	0.00186369	0.00221284	0.00254451	0.00115283	0.000885395	0.000656509	0.00305544	0.00236514	0.00407304	0.000764415	0.000754167	0.000532073	0.000678714	0.000729553	0.000815791
FBti0019447	mdg1{}1442	0.00116761	0.00103411	0.00111722	0.00142161	0.00143864	0.00148467	0.00154447	0.00152889	0.00149202	0.00103105	0.00081143	0.000852526	0.00110874	0.00129946	0.00108461	0.0029214	0.0022743	0.0023506	0.00152066	0.00195144	0.00141713
FBti0019448	jockey{}1443	0.00106988	0.00130835	0.0012249	0.00101991	0.000995006	0.00173846	0.000830052	0.000994215	0.00079313	0.000528931	0.000617641	0.000516489	0.00125789	0.000842594	0.00112033	0.000818224	0.00088104	0.000656487	0.000767722	0.000679165	0.000893791
FBti0019449	jockey{}1444	0	0	8.65804e-05	0.000258995	0.000172711	0	0.000172458	8.6287e-05	0	0	0.000345694	0.000259114	0	8.62255e-05	0.000345229	8.6308e-05	0	0	0	0.000258699	8.63117e-05
FBti0019450	roo{}1445	0.000165333	0.000275413	0.000331744	0.000336304	0.000297794	0.000606739	0.000104626	0.000203882	0.000292148	0.000198507	0.000198686	0.000226144	0.000192768	0.000181711	0.000231488	0.000248025	0.000208954	0.000187943	0.000236955	0.000313892	0.000325202
FBti0019451	jockey{}1447	0.000757507	0.000818172	0.000907065	0.00105113	0.000947502	0.00113112	0.000543252	0.000409239	0.000464373	0.000984069	0.0016212	0.000917104	0.00104397	0.00112308	0.00124023	0.0013441	0.00189454	0.00157473	0.00154541	0.00152606	0.00166798
FBti0020391	Stalker4{}1446	0.000253021	0.000323367	0.000203908	0.000190874	0.000452414	0.000676682	0.000207225	0.000182481	0.000199139	0.000178455	0.000261693	0.000249081	0.000203119	8.28867e-05	0.000153486	0.000593207	0.000415347	0.000357794	0.000601387	0.000368878	0.000443887
FBti0019452	S{}1448	0.000138626	0	6.95385e-05	6.93388e-05	0	6.93719e-05	0	0	0	0	0	0	0	0	0	0	6.73847e-05	6.95218e-05	0.000138613	0	0
FBti0020392	FB{}1449	0.000491116	0.00070123	0.000774267	0.000514695	0.000397829	0.00114691	0.000327144	0.000420896	0.000233912	0.000233991	0.000351302	0.000280872	0.000350578	0.000350497	0.000397606	0.000350832	0.000522926	0.000562968	0.000561222	0.000654318	0.000491186
FBti0019453	jockey{}1450	0.0003706	0.000617347	0.000371807	0.000370739	0	0.000123639	0.000123433	0.000247031	0.000247117	0.000618001	0.000123711	0	0.000123456	0.000370283	0	0	0.000120097	0.000123906	0.000123522	0.000493753	0.000123551
FBti0019454	jockey{}1451	0.000562603	0.00112462	0.000641403	0.000716308	0.000997992	0.000998191	0.000485488	0.000536953	0.000690607	0.00099788	0.00174146	0.00161243	0.00138007	0.00109869	0.00130433	0.00132992	0.00139224	0.0014877	0.00189221	0.00127766	0.00161132
FBti0019455	jockey{}1452	0.000805876	0.000792467	0.000978024	0.00101422	0.00111856	0.00118383	0.000545471	0.000610818	0.000572028	0.000533206	0.000533685	0.000390265	0.000818361	0.00101298	0.00122192	0.000779958	0.00084664	0.000847417	0.00118271	0.000792268	0.00085799
FBti0019457	pogo{}1454	0.000882196	0.000534387	0.000429124	0.000588351	0.000722268	0.000882948	0.00178967	0.00171068	0.00160432	0.00331671	0.0028378	0.00310364	0.00136254	0.00168275	0.00122984	0.00414406	0.00499	0.00364668	0.00360864	0.00333908	0.00272718
FBti0019458	roo{}1455	0.000370369	0.000319699	0.000263481	0.000387349	0.000347027	0.000653754	0.000218676	0.000158226	0.000242473	0.000181916	0.000212426	0.000124683	0.000141325	0.000148021	0.000111121	0.000255917	0.000268413	0.000280303	0.000249134	0.00031289	0.000235723
FBti0019456	H{}1453	0.00169959	0.00176405	0.00168327	0.00237596	0.00237662	0.0018537	0.00256909	0.00237473	0.00211403	0.000893859	0.00141837	0.00130847	0.00202517	0.0016546	0.00148183	0.000108959	0.000296569	0.000240409	0.000261451	6.53187e-05	0.000130757
FBti0019459	H{}1456	0.00154707	0.0019165	0.00212048	0.002049	0.00189694	0.00261699	0.0019377	0.00209151	0.00209223	0.000588639	0.000741915	0.00119943	0.0020034	0.00252544	0.00126392	0.000305086	0.000402487	0.000240409	0.000196089	0.000174183	0.000174342
FBti0019460	1360{}1457	0.000194252	0.000194151	0.000250566	0.000249846	0.000555367	0.000194417	0.000415914	0.000166478	0.000166535	0.000360948	0.000444643	0.000138867	0.000110932	0.000415897	0.00019427	0.000138765	5.39566e-05	0.000167004	0.000249729	0.000194102	0.000111017
FBti0019461	roo{}1458	0.000536765	0.000772216	0.000587469	0.00052883	0.000683601	0.00163609	0.000459129	0.000402516	0.000467731	0.00061029	0.000765584	0.000679656	0.00051611	0.000560683	0.000402611	0.000512418	0.000324169	0.000407866	0.000687157	0.000613555	0.000528708
FBti0019462	412{}1459	0.00080153	0.00105602	0.000812263	0.000789681	0.000822307	0.000923761	0.00267364	0.00250139	0.00229171	0.00240994	0.00269994	0.0026902	0.00134718	0.00122149	0.00102832	0.000149796	0.000251873	0.000272043	0.000218579	0.000157756	0.000230777
FBti0019463	roo{}1460	0.000335924	0.000350672	0.000187232	0.000373389	0.000377227	0.000597707	0.000186472	0.000194062	0.000201595	0.000268884	0.00028034	0.000239079	0.000268571	0.000175277	0.00014558	0.000317293	0.00024312	0.000228368	0.000264982	0.000216318	0.000182918
FBti0019464	jockey{}1461	0.00093302	0.000804791	0.000859122	0.000856654	0.000946418	0.000716351	0.00037035	0.000396157	0.000396294	0.00057546	0.000857565	0.000537254	0.000766386	0.000638508	0.000779718	0.000447383	0.000857363	0.000615342	0.000575095	0.000536393	0.000933153
FBti0019465	blood{}1462	0.0014012	0.00165661	0.00176239	0.00109574	0.00107537	0.00115418	0.00246146	0.00244245	0.00210843	0.0036393	0.0032245	0.00376447	0.00354831	0.00384071	0.00271585	0.0016907	0.00208151	0.00121886	0.00112003	0.00135056	0.00117817
FBti0020393	1360{}1463	0.000162851	0.000508644	0.000245071	0.000427643	0.00054998	0.000509342	8.1359e-05	0.00012212	0.000162884	0.000162939	0.000203856	0.000203733	0.000101718	0.000203389	0.00022394	0.000183225	0.000257271	0.000224595	8.14176e-05	8.13627e-05	0.000101796
FBti0019466	springer{}1464	0.000954464	0.000848424	0.000835329	0.00100764	0.00089006	0.0012317	0.0133638	0.0144733	0.0142793	0.0209892	0.0212237	0.0215808	0.00591804	0.00557579	0.00562982	0.0123443	0.0128131	0.0114718	0.0104413	0.0114285	0.011703
FBti0019467	diver{}1465	0.000389635	0.000414396	0.000310718	0.000379786	0.000379892	0.000759935	0.000519089	0.000529428	0.000519619	0.000464815	0.000735368	0.000444954	0.000329485	0.000354364	0.00031973	0.00109908	0.000980984	0.000951972	0.000889082	0.000868517	0.000729421
FBti0019468	copia{}1466	0.0205354	0.0181496	0.0199987	0.449218	0.437841	0.404327	0.465716	0.469858	0.424474	0.0442988	0.0432889	0.0541291	0.029272	0.0243797	0.0246411	0.0353865	0.0412947	0.0338111	0.0748386	0.0598091	0.0628777
FBti0019469	copia{}1467	0.0184938	0.0170848	0.018034	0.452874	0.432699	0.395397	0.492204	0.505557	0.482968	0.0661462	0.0654121	0.0813475	0.0356247	0.0277169	0.028786	0.073482	0.0800555	0.0649831	0.146536	0.118325	0.127634
FBti0019470	Doc{}1468	0.00147065	0.00188613	0.00177574	0.00282522	0.00279996	0.00285913	0.00154747	0.00160056	0.00162715	0.0026564	0.00316709	0.00258555	0.00186642	0.00157341	0.00215411	0.00190682	0.00198012	0.00155993	0.00163968	0.00167759	0.00194596
FBti0019471	blood{}1470	0.00158699	0.0016316	0.00186995	0.00127337	0.00127786	0.00125744	0.00243222	0.00226444	0.00192627	0.00348168	0.00308749	0.00330071	0.00322568	0.00377	0.00233937	0.00152515	0.00222989	0.00150887	0.00101243	0.00132973	0.00117801
FBti0019839	1360{}502	0	0	0.0004071	0	0.000203022	0.000203062	0.000810896	0.00020286	0.000405861	0.000811995	0	0	0.000202762	0	0.00101454	0.000405819	0.000197245	0.0010175	0	0.000202733	0.000202918
FBti0019840	1360{}503	0.000795747	0.000681716	0.000969411	0.00125093	0.00045501	0.000284438	0.000511135	0.000511479	0.000454805	0.000170609	0.000569209	0.000227546	0.000227214	0.000681485	0.000625287	0.000738982	0.000718353	0.000513094	0.000568337	0.000624749	0.00062532
FBti0019842	1360{}505	0.000937299	0.000642386	0.00112842	0.000964439	0.00155425	0.000616464	0.000642195	0.000696179	0.00034821	0.000321533	0.000348641	0.000294825	0.000294395	0.000615412	0.000428519	0.000857044	0.00101536	0.00123559	0.000883655	0.000561947	0.000669595
FBti0019843	Bari2{}506	0	0	0	0	3.29992e-05	0	0	0	0	3.29955e-05	0	6.60104e-05	3.29571e-05	6.58989e-05	0	0	0.000128241	0	0	0	0
FBti0019230	Rt1b{}507	5.18088e-05	0.000241649	8.66292e-05	0	3.45617e-05	0.00012099	3.45111e-05	0	3.45462e-05	0	0	0	0	0	0	0	0	3.46433e-05	0	0	0
FBti0019231	roo{}508	0.000366711	0.000398392	0.000219943	0.000322986	0.000398859	0.000630322	0.000187189	0.000211227	0.000187379	0.000163514	0.000259462	0.000207444	0.00015934	0.000127442	0.00016344	0.000215265	0.000155004	0.0001999	0.000255079	0.000219061	0.000322911
FBti0019232	Ivk{}509	5.17155e-05	0.000186079	0.000197159	3.10409e-05	0.000103499	0.000351965	5.16734e-05	0.000134441	0.000113797	4.13948e-05	0.000145012	8.28139e-05	7.23564e-05	1.03343e-05	4.13762e-05	0.000155162	8.0443e-05	0.000103743	1.03421e-05	0.000103352	6.20675e-05
FBti0019234	invader4{}511	0.00268905	0.00401733	0.00296285	0.383791	0.389015	0.328192	0.298882	0.315385	0.272196	0.00614567	0.00708663	0.0117284	0.0044978	0.00320524	0.00298181	0.00624676	0.00768679	0.00782648	0.0193593	0.0106159	0.0122204
FBti0019235	mariner2{}513	0.000110401	0.000441375	5.53802e-05	0	0	0.000110495	5.51555e-05	0.000110385	5.52117e-05	5.52303e-05	5.52799e-05	0	5.5166e-05	0	0	0.00027603	0.000160995	0.000110734	5.51953e-05	0	0.000220834
FBti0019845	HB{}515	4.36104e-05	0.000239733	0.000175009	0.000239947	6.54582e-05	0.000218238	6.53622e-05	0.000174416	8.72385e-05	0.000196353	0.000371221	8.72935e-05	6.53746e-05	0.000174292	2.18072e-05	0.000261688	0.000339178	0.000153096	0.00034885	0.000108942	0.000109041
FBti0019846	FB{}nolo[FB]	0.000173741	0.000115767	0.000377664	5.79352e-05	0.00020283	0.000231852	0.000260399	0.000144763	0.000144813	5.79449e-05	0.000115994	8.69428e-05	0.000318325	0.000173592	5.79189e-05	0.000434395	0.000253361	0.000290441	0.000521173	0.000347214	0.000289609
FBti0019237	297{}518	0.000676306	0.000623336	0.000784145	0.000534766	0.000660538	0.000502596	0.000655523	0.000676209	0.000583281	0.000551062	0.00050289	0.000616074	0.000570656	0.000679774	0.000538665	0.000599421	0.000712612	0.000601168	0.000473775	0.000594854	0.000583246
FBti0019847	1360{}517	0	0	0	0.0001477	0	7.38853e-05	0	0	0	0	0.000147857	0	0	0	7.38291e-05	0	0	0	0	0	0.000147666
FBti0019236	Burdock{}514	0.000401286	0.000367655	0.000551169	0.000396657	0.000540178	0.000573754	0.000472559	0.000439441	0.000477819	0.000434961	0.000674557	0.000616775	0.000911877	0.000968944	0.00107497	0.00012422	0.000195062	0.000172498	0.000128973	9.54708e-05	0.000172004
FBti0019844	HB{}512	0.00438196	0.00379947	0.00467804	0.00496433	0.00616498	0.00592256	0.00492101	0.00445623	0.00462634	0.00492769	0.00609482	0.00459178	0.00467865	0.00387303	0.00434491	0.00539372	0.00531598	0.00544701	0.00617911	0.0054826	0.00674244
FBti0019841	1360{}504	0.000802967	0.000740816	0.000929517	0.000988637	0.00142156	0.000741832	0.000432014	0.000432305	0.000617792	0.0004326	0.000247422	0.000432727	0.000370368	0.000308569	0.000864813	0.001359	0.000300242	0.00136296	0.00117346	0.000493753	0.000308878
FBti0019838	roo{}501	0.000818613	0.000762993	0.000821279	0.000773424	0.000897162	0.000920099	0.000548543	0.000545664	0.000623832	0.000624042	0.000637615	0.000604719	0.000850565	0.000652383	0.000562036	0.00051006	0.000609513	0.000609295	0.000535946	0.000684899	0.000539322
FBti0019849	G4{}520	8.47086e-05	5.64431e-05	8.49844e-05	0.000112987	0	0.000565205	0.000169279	8.46964e-05	8.47258e-05	8.47544e-05	5.65537e-05	8.47793e-05	5.64371e-05	5.64241e-05	0.000112955	0.000169434	0.000164704	0.000141607	2.82335e-05	8.46435e-05	0.000112961
FBti0019240	invader2{}523	0.000129267	0	0.000259376	0	0.000129351	0.00103502	0.000258323	0.000258497	0.000258587	0	0	0	0	0	0	0	0	0	0	0	0
FBti0019850	HB{}524	0.000118287	0.000331031	0.000356016	0.000236662	0.00042611	0.000520905	0.000401847	0.000331155	0.000212959	0.000544413	0.000379062	0.000355156	0.000449208	0.000212734	0.000283914	0.000189278	0.000735976	0.000569488	0.000449447	0.000401866	0.000473215
FBti0019244	Ivk{}530	0.000395776	0.000766922	0.000623959	0.000654486	0.000848644	0.00104283	0.000702131	0.000605692	0.00074324	0.000444478	0.000477232	0.000549698	0.000629616	0.000750523	0.00040389	0.000242336	0.000518256	0.000421273	0.00028267	0.000314763	0.000573553
FBti0019853	FB{}531	0.000702967	0.000751621	0.000623249	0.000572396	0.00104696	0.000638118	0.000686059	0.000359606	0.000670407	0.000670633	0.000458405	0.000310872	0.000408446	0.000473688	0.00035969	0.00053954	0.000731092	0.000541113	0.000621168	0.000604413	0.000654016
FBti0019245	S{}532	0.000102121	0.000204136	0	0.000204318	0.000306563	0.000102208	0.000204075	0	0.000204283	0.000204352	0	0	0	0	0	0	0	0.000102429	0	0.000102042	0
FBti0019246	S{}533	0.00068749	0.00154605	0.00219851	0.000558795	0.00120389	0.00103211	0.00201786	0.00176144	0.00141824	0.00240752	0.00378664	0.00301028	0.00240471	0.00176019	0.000859441	0.0012462	0.00187978	0.00124983	0.000687425	0.000815767	0.000988408
FBti0019852	HB{}529	0.000270933	0.000354113	0.000418177	0.000208488	0.000729911	0.000479752	0.000249888	0.000395922	0.000458595	0.000291932	0.000250452	0.000354593	0.000624839	0.000374817	0.000270958	0.000125059	0.000222874	0.000146327	4.16781e-05	0.000229075	0.000145908
FBti0019243	1360{}528	0	1.91497e-05	0	0.000134168	0	0.000115056	3.82881e-05	5.74707e-05	3.83271e-05	1.917e-05	7.67489e-05	1.91756e-05	0	0	1.91614e-05	7.66462e-05	5.588e-05	1.92174e-05	0	3.82898e-05	0.000114974
FBti0019242	297{}527	9.17254e-05	0.000152796	7.66867e-05	1.52933e-05	9.17852e-05	0.000198908	0.000122201	7.64268e-05	0.000122325	0.000152958	0.000168405	0.000198904	0.000106946	0.000168019	3.05779e-05	0	2.97246e-05	9.20019e-05	6.11445e-05	0	0
FBti0019851	G4{}526	0	0	0	0	7.21324e-05	0.000288587	7.20266e-05	0	0	0	0	0	0	0	0	0	0.00028032	0	0	0	0
FBti0019239	mariner2{}522	3.48536e-05	3.48355e-05	0.000104901	0.000174333	6.97526e-05	0.000139533	3.48251e-05	0.000209091	0.000139443	0.000278979	0.00027923	0.000279061	0.000139327	0.000208942	0.00010457	0.000209142	0.000372724	0.000104876	0.000174251	0.000243787	0.000139434
FBti0019238	roo{}CG2528[iso-1]	0.000359991	0.000312727	0.000337536	0.000336566	0.000282794	0.000656618	0.000211785	0.000174924	0.000212001	0.000181776	0.000249324	0.000202033	0.000245448	0.000235307	0.000225436	0.000292733	0.000245311	0.000209222	0.000245578	0.000248775	0.000286015
FBti0019848	HB{}519	0.000419675	0.000251674	0.000442094	0	4.19949e-05	4.20033e-05	2.09666e-05	6.29422e-05	0	4.19902e-05	0	4.20025e-05	0	2.09658e-05	0	0.000146901	0.000204	0.00042094	0.000293745	0.000125806	0.000125921
FBti0019854	jockey2{}535	0.000535131	0.00106971	0.000268437	0.000133833	0.00026774	0.000267794	0	0.000535055	0.00107048	0.000535421	0.0010718	0.000669472	0.000401097	0.000133668	0	0.000133796	0.000650306	0.000268372	0.00013377	0.00040104	0.000267604
FBti0019248	R1A1{}536	8.28007e-05	0.000248273	0	0.000165663	0.000248564	0.000165743	0	0.000165578	0	0	0	0	0	0.00016546	0	8.2809e-05	0	0	0	0	0
FBti0019249	Idefix{}537	6.22689e-05	0.000435656	6.24716e-05	0	0.000124619	0.000436254	0.000311091	0	0.000186845	0	0	0	0.00018669	0	0	0	0.000121073	6.24566e-05	0	6.2221e-05	0
FBti0019860	G5{}545	0	9.36403e-05	9.3994e-05	0.000281172	0.00065625	0.000187538	9.36126e-05	0.000187351	9.3708e-05	0.000468698	0.000375295	0.000468835	0	0.000280826	9.36975e-05	0.000187397	0.000364331	9.39714e-05	0.0004684	9.36169e-05	0
FBti0019252	G3{}546	0.0231188	0.0224019	0.022745	0.0184565	0.0168228	0.0165343	0.0213652	0.0216847	0.0197726	0.0155418	0.014639	0.0130487	0.0195597	0.0201718	0.0139071	0.0199503	0.0204813	0.017927	0.0191632	0.0197466	0.0168854
FBti0019861	1360{}548	0.000418039	0.000238755	0.000359486	0.000119484	0.000358553	0.000268968	0.000179013	0.00047769	0.000418124	0.000239008	0.000119612	0.000239079	0.00023873	0.000179006	0	0.000149315	0.000290293	0.000479199	0.000388142	0.000238696	0.000418099
FBti0019864	1360{}551	0.00016864	5.61842e-05	0.000112793	8.43516e-05	0.00016875	0.000168784	5.61675e-05	0.000140513	0.00011245	0.000112487	0.000112588	0.000168781	5.61782e-05	2.80826e-05	0	0.000309204	0.000191274	5.63828e-05	5.6208e-05	0.00016851	0.000112443
FBti0019862	G6{}549	0.000360074	0.000629802	0.000210727	0	7.50643e-05	0.000345365	5.99634e-05	0	0.000225092	0	0	0	5.99747e-05	0	9.00267e-05	6.00183e-05	5.83429e-05	0	9.00099e-05	2.99831e-05	3.00104e-05
FBti0019858	invader4{}543	0	0	8.88325e-05	0.0011515	0.00265806	0.00194963	0.00238874	0.0014165	0.00230262	0	0.000177343	0	8.84887e-05	8.84684e-05	0	8.8553e-05	0.000258243	0	0.000265607	0.000176952	0
FBti0019857	1360{}542	0	2.50371e-05	0	0.000426011	0.000538929	0.000313393	0.000250297	0.000413267	0.000275607	2.50636e-05	3.76292e-05	5.0142e-05	2.50344e-05	2.50287e-05	0	1.25263e-05	1.21766e-05	7.53769e-05	6.26193e-05	0.000100123	7.51611e-05
FBti0019251	diver2{}540	0	0.000395612	0	7.91931e-05	0.000475291	0.000316924	0	0.000712369	0.000316718	7.92063e-05	0.00031711	0.000316918	0	0.000316383	0	0.000158343	0	0.000158804	7.9156e-05	0.000553718	0.000475049
FBti0019250	copia{}539	0.0228045	0.0207092	0.0229983	0.501815	0.487658	0.447347	0.517042	0.510386	0.466887	0.0416054	0.0429668	0.0529608	0.0308968	0.0269445	0.0252129	0.0335877	0.0373458	0.0319592	0.0685797	0.0535544	0.060233
FBti0019855	FB{}538	0.000289933	0.000193189	0	9.66806e-05	0	0.00029018	4.82828e-05	9.66305e-05	0.000144996	9.66966e-05	4.83917e-05	4.83625e-05	9.65839e-05	0.000144843	4.83266e-05	0.000144981	4.6978e-05	9.69358e-05	9.66353e-05	4.8285e-05	0
FBti0018875	BS{}707	6.57174e-05	0.000107482	0.000191801	4.18358e-05	8.96732e-05	0.000430517	7.16333e-05	2.38938e-05	4.78042e-05	2.39102e-05	4.78633e-05	2.39172e-05	1.79117e-05	5.37228e-05	1.19497e-05	3.58495e-05	4.06568e-05	3.5954e-05	3.58425e-05	5.96972e-05	4.18262e-05
FBti0018898	Cr1a{}708	0.000156246	0.000276292	0.000229103	7.21406e-05	0.000312696	0.000204496	0.000132101	0.000360516	0.000192342	0.000468992	0.00038516	0.000264637	0.000120114	6.00433e-05	0.00014424	0.000252423	4.67384e-05	0.000289324	0.000300445	0.000360291	0.000384661
FBti0019940	HB{}703	6.76297e-05	3.37973e-05	0.00020355	3.38275e-05	0.000135348	0.000101531	6.75746e-05	0.00013524	0.000101465	0.000338331	6.77271e-05	0.000169215	0.000168969	0	0.000236726	6.76365e-05	3.28742e-05	3.39168e-05	0.000135247	6.75777e-05	0.000270558
FBti0018958	flea{}704	0.017482	0.0122384	0.0154813	0.105719	0.109975	0.145755	0.0840576	0.0820451	0.0796803	0.014279	0.0115838	0.0189995	0.0134632	0.0176683	0.0108784	0.0204934	0.0223959	0.0179939	0.0195434	0.0243548	0.0179729
FBti0018924	I{}706	6.22689e-05	0.000560129	0	0	0.000498476	0.000560897	0.000373309	0.00024904	0.000373689	0	0.000311792	0	0.00012446	0	0	0	0.00018161	0.000124913	0.000124526	0	0.000249111
FBti0019914	opus{}659	0.00080537	0.000893497	0.000715073	0.000402836	0.000350565	0.000536028	0.000643771	0.000656282	0.000813589	0.00118453	0.00105252	0.000894706	0.000503041	0.0005673	0.000724899	0.00027788	0.000183997	0.000302924	0.000563706	0.000680014	0.000676608
FBti0019915	Stalker2{}660	5.55592e-05	0.000111061	8.36102e-05	0.000106528	0.000101925	0.000134383	0.000342336	0.000439781	0.000273222	0.000375227	0.000445113	0.000518985	5.08974e-05	5.08857e-05	6.01947e-05	0.000185216	0.000162041	0.000297209	0.000268511	0.000138791	9.72425e-05
FBti0019916	1360{}661	0.000255515	0.000306459	0.000384521	0.00023005	0.000230114	0.000179013	5.10614e-05	0.000153287	5.11134e-05	0	5.11766e-05	5.11457e-05	7.66066e-05	0.000102119	0.000102215	0.000153324	9.93629e-05	0.000333171	5.10982e-05	0.000204255	0.000127776
FBti0018956	baggins{}662	0.000436333	0.000636286	0.000609984	0.00074419	0.000701451	0.00115261	0.000671833	0.000665133	0.000565201	0.000322059	0.000343838	0.000314994	0.000378871	0.000328756	0.000228917	0.000407761	0.000660631	0.000681583	0.00070808	0.00040026	0.000558013
FBti0019037	transib3{}670	0.00335821	0.0040042	0.00447249	0.00335946	0.00389099	0.00402935	0.00180528	0.00341663	0.00243569	0.00424424	0.00377604	0.00318411	0.00314022	0.0032376	0.0024747	0.00384956	0.00517402	0.00472748	0.00418264	0.00363035	0.00504785
FBti0019035	transib2{}671	0.000306921	0.000585636	0.000475877	0.000279123	0.000698002	0.00139628	0.000501825	0.000251081	0.000139538	0.000223336	0.000307362	0.000390952	0.000446151	0.000111512	0.000139522	0.00041857	0.000325509	0.000223888	0.000334791	8.36413e-05	0.000167435
FBti0019005	Rt1a{}672	0.000274258	0.000128996	0.000258966	0.00014525	0.000226007	0.000613571	0.000112838	0.000145175	0.00029045	0.000258265	0.000290809	0.000290633	0.000128982	0.000370738	0.000451761	0.000306555	0.000188209	0.000275085	0.000209707	0.000112843	0.000225892
FBti0019918	HB{}673	4.04493e-05	0.00018597	4.0581e-05	1.61858e-05	1.61903e-05	8.09675e-06	3.2333e-05	1.61774e-05	4.8549e-05	9.71307e-05	1.6203e-05	3.23864e-05	3.23392e-05	2.42488e-05	1.61812e-05	3.23626e-05	2.35944e-05	6.4914e-05	1.61782e-05	5.65854e-05	0
FBti0019919	HB{}674	0	0.000138554	0.000208616	0.000208016	0	6.93719e-05	6.92563e-05	6.93029e-05	0.000138654	0	6.94126e-05	0	0.000207808	6.92535e-05	6.93192e-05	0	6.73847e-05	0	0	0	0
FBti0018978	invader1{}677	0.00202365	0.00289704	0.00225158	0.0334028	0.0374544	0.0319492	0.0483761	0.0501048	0.0531355	0.004118	0.00512736	0.00376135	0.00156621	0.00105657	0.00152929	0.00442053	0.00386076	0.00420449	0.0107563	0.00769309	0.00902404
FBti0018900	Dm88{}678	0.000258534	0.000406057	0.000203795	0.000221683	0.000406533	0.000443579	9.22583e-05	0.000203105	0.000258587	9.23835e-05	9.24664e-05	5.54464e-05	0.000110731	7.38036e-05	5.54052e-05	0.000350903	0.000215436	0.000185224	0.00022158	0.00022143	9.23468e-05
FBti0019922	1360{}680	0.00048629	0.000763774	0.00055757	0.00910398	0.00736863	0.00639669	0.0088155	0.00986333	0.0103531	0.00132064	0.0013914	0.00069528	0.0010414	0.000763516	0.000486335	0.00159797	0.00114814	0.000905833	0.00159766	0.001666	0.00201492
FBti0018896	Cr1a{}688	0.000202402	0.000279946	0.000213316	0.000376322	0.00054009	0.000931024	0.000159338	0.000275963	0.000319001	0.000173873	0.000192456	0.000126862	0.000206362	9.39648e-05	0.000153349	0.000218779	0.000180871	0.000190708	0.00030664	0.00029009	0.000359877
FBti0019931	springer{}690	0	0	0	0	0	0	0	0	0	0	0	0	0	0	0	0	0	0	0	0	0
FBti0019932	springer{}691	0.000146841	0.000200133	0.000174104	9.34789e-05	0.00018701	0.000601223	0.000120044	8.00833e-05	0.000186926	5.34254e-05	2.67367e-05	5.34411e-05	0.000106726	5.33508e-05	2.67007e-05	0.000133505	3.89334e-05	9.37257e-05	0.000146827	0.00012005	0.000200266
FBti0019006	Rt1a{}696	0.000204925	0.000163855	0.000164474	0	4.10117e-05	0.00022561	0.000122855	2.04896e-05	0.000102483	0	0	0	4.09593e-05	2.04749e-05	0	4.09891e-05	0.000338681	4.11086e-05	0.000122943	6.14302e-05	8.19817e-05
FBti0019935	diver2{}698	0.000718038	0.000956887	0.00104054	0.000478871	0.00103784	0.0007985	0.00103632	0.00111679	0.000957578	0.00175615	0.00103866	0.000718637	0.00103652	0.000637709	0.00111705	0.00103727	0.00217175	0.00184052	0.00191459	0.000956647	0.00151607
FBti0019939	1360{}702	0.000140792	0.000197006	0.000113	0.000169013	0.000225414	0.000140912	0.000168812	0.000281543	8.44922e-05	0.000309909	0.000394784	0.00031	0.000450252	0.00019694	0.000225287	0.000309773	0.0003285	0.000225946	0.000309713	0.000112547	0.000394273
FBti0019937	1360{}700	0	0	0.000139392	0.0016679	0.00166837	0.0016687	0.00124944	0.00159758	0.00187607	0.000139015	0.00027828	0.000417168	0	0	0.000138953	0.000764247	0.00027015	0.000487756	0.000486244	0.000277666	0.00027792
FBti0018984	invader3{}695	0.000610039	0.000609723	0.000769243	0.000722243	0.000688842	0.000885031	0.0127668	0.013044	0.0115707	0.0139489	0.015839	0.0152917	0.00151016	0.00173349	0.00144968	0.000884365	0.000794386	0.000842034	0.00648035	0.00687304	0.00603969
FBti0018979	invader1{}694	0.000412989	0.0010507	0.000753334	0.000976521	0.00127734	0.00296854	0.000300111	0.000525547	0.00101391	0.000338083	0.000187992	0.000300606	0.000487773	0.000412635	0.000225287	0.000826061	0.0004015	0.000677838	0.000600655	0.000412671	0.000713447
FBti0018897	Cr1a{}693	0.000713261	0.000882628	0.000885961	0.000713528	0.00125752	0.00176768	0.000509057	0.000475439	0.00122298	0.000985512	0.00122449	0.000917815	0.000746759	0.000475101	0.000611423	0.0014946	0.0011557	0.000919815	0.00112073	0.00132361	0.00156261
FBti0019929	baggins{}687	0.000363767	0.000549801	0.000551878	0.000505914	0.000585958	0.00101231	0.000478717	0.000363715	0.000470331	0.000470489	0.000284324	0.000337431	0.000310338	0.000212754	0.000177464	0.000337184	0.000560661	0.000533947	0.00075408	0.000434412	0.000541292
FBti0019928	baggins{}686	0.00017088	0.00037818	0.000342872	0.000219785	0.0002687	0.000684101	0.000158545	0.000207467	8.54572e-05	0.000207609	0.000268912	0.00014659	8.53863e-05	4.8781e-05	6.1034e-05	0.00015869	0.00015426	0.000208122	0.000280704	0.000292711	0.000231941
FBti0019927	baggins{}685	0.000443382	0.000457447	0.00054527	0.000414932	0.000472295	0.000815946	0.000342984	0.000328914	0.000286111	0.000157414	0.000243495	0.000143146	0.000171524	0.000114323	7.15198e-05	0.000443426	0.000431048	0.000215187	0.000429039	0.000357291	0.000329008
FBti0019926	baggins{}684	0.000184186	0.000269999	9.85524e-05	8.59856e-05	0.000221167	0.000147474	4.90762e-05	0.00013505	0.000122816	0.000110571	0.000172154	8.60252e-05	2.45428e-05	7.36113e-05	0.000135082	7.36818e-05	0.000167125	0.000172425	0.00023328	8.58874e-05	0.000159651
FBti0019924	baggins{}682	0	0.000122412	3.51068e-05	1.7503e-05	0.000105047	0.00026267	3.49644e-05	0.000209927	3.5e-05	8.75295e-05	0.00010513	7.00442e-05	0	6.99259e-05	3.49961e-05	5.24946e-05	3.40195e-05	5.26476e-05	3.49896e-05	5.2449e-05	0
FBti0019920	1360{}676	0	0	5.4352e-05	0.00013549	2.71055e-05	0.00032533	0	0.000108336	5.41866e-05	0.000216819	0.000488282	0.000108441	0.000189496	5.41292e-05	5.41805e-05	0	0	0.000326033	0.000270852	0.000162402	0.000108367
FBti0018894	Cr1a{}675	6.56726e-05	3.28193e-05	4.94148e-05	0	6.57155e-05	6.57286e-05	6.56191e-05	4.92474e-05	3.2843e-05	0.00016427	0.000131534	3.28637e-05	3.28158e-05	0	3.28393e-05	0	3.19229e-05	6.58706e-05	6.56664e-05	0	0
FBti0019039	transib4{}669	0.000110123	0.000132079	0	0.000374559	0.00022039	0.000330651	4.40134e-05	4.4043e-05	4.40582e-05	0.000308512	0.000220563	4.4086e-05	4.40217e-05	0.000154041	0.00019824	0.000264322	0.00010706	0.000176728	0.000176181	2.20077e-05	0.000308389
FBti0018957	baggins{}668	0.000252002	0.00043178	3.61176e-05	0	0.000324214	0.000180155	7.1942e-05	0.000251966	0.000288061	3.60198e-05	0.000108156	3.60304e-05	0.000143911	7.1939e-05	0	3.60039e-05	0	0.000144435	0.000143988	0.000143891	3.60055e-05
FBti0018893	Cr1a{}667	0.00129148	0.00188065	0.00132143	0.00153153	0.00195988	0.00254236	0.000846041	0.00110316	0.00136873	0.0011467	0.00168733	0.00110424	0.0012052	0.000948553	0.000889577	0.00164231	0.00173782	0.00150984	0.00199262	0.00155542	0.00206153
FBti0019917	1360{}666	0.000888423	0.00137491	0.000575043	0.000802747	0.000860326	0.00108996	0.000515438	0.00048713	0.000945933	0.000946252	0.000688801	0.000774434	0.000830586	0.000658589	0.000487245	0.00068788	0.00128163	0.000891102	0.00106028	0.000715919	0.000945876
FBti0019274	S{}665	0.00056042	0.000466774	0.000281122	0.000467191	0.000841178	0.000186966	0.000373309	0	0	0.000467269	0.000187075	0.000280444	0.00018669	0.000186647	0.000186824	0	0.000817245	0.000468424	0.000373578	0.000186663	0.000653917
FBti0018881	Burdock{}CG42345[664]	0.000166566	0.000380525	0.000477453	0.000785534	0.00069051	0.000762094	0.000368524	0.000333085	0.0005117	0.0011904	0.00110807	0.00132173	0.00222346	0.00200897	0.00211796	7.13926e-05	0.000208199	0.000155135	0.000130861	0.000142661	8.3295e-05
FBti0018944	Tc1{}663	0.00366746	0.00390623	0.00473863	0.00361325	0.0043371	0.00287344	0.00383104	0.00503741	0.00364968	0.00511498	0.00552766	0.00389298	0.00509051	0.00347926	0.00342698	0.00781729	0.00691479	0.0071341	0.0088159	0.00701464	0.00833633
FBti0018911	F{}656	0.000582751	0.000731483	0.00060602	0.000340953	0.000459806	0.00103401	0.000630926	0.000634393	0.000703096	0.000741392	0.000879194	0.000762929	0.000451616	0.000410465	0.000531067	0.000319556	0.000383117	0.000436473	0.000505105	0.000472836	0.00053566
FBti0018942	Tc1{}617	2.99182e-05	0.000239222	0.000240125	5.98589e-05	0.000299378	0.000119775	0.000149469	0.000269226	0.000359092	0.000239475	0	0.000269489	0.000478392	0.000298926	0.00029921	0.000269291	0.000174516	0.000120034	0	0.000209267	0.00023938
FBti0018890	Cr1a{}620	0.000147054	0.000171474	0.000393421	0.000147109	9.81001e-05	0.000196239	9.79562e-05	0.000196044	4.9028e-05	0.000245223	0.00017181	0.000245295	0.000342912	0.00012244	0.00019609	0.000147069	0.000309754	0.000147497	0.000343094	0.000293882	9.80501e-05
FBti0019038	transib4{}623	0.000308522	6.16725e-05	6.19054e-05	0	0	0	0	0	3.08585e-05	0	0	0	0.000184998	9.24775e-05	0.00012342	0	5.9988e-05	0.000123781	0.000123397	9.24855e-05	0.000123427
FBti0019900	accord2{}625	0.000452536	0.00109273	0.000719183	0.000328512	0.000657206	0.00113832	0.000416154	0.000388404	0.000364506	0.000288497	0.000280735	0.000328663	0.00041223	0.000324106	0.000252322	0.000600771	0.000447734	0.000574405	0.000560611	0.000528219	0.00051268
FBti0018919	G3{}626	2.1469e-05	0	4.30778e-05	0	0	0	0	0	0	4.29612e-05	0	0	0	0	0	0	0	2.15337e-05	0	0	0
FBti0018929	Rt1b{}627	0.000422084	0.000562487	0.000458747	0.000140747	0.000351966	0.000633666	0.000175725	0.000422024	0.000140723	3.51927e-05	0.000211346	0.000140812	0.000351517	0.000281149	0.000246238	0.000527658	0.000376147	0.000388077	0.000246193	3.51466e-05	0.000351787
FBti0018955	baggins{}630	0.000567689	0.000453916	0.000398676	0.00020823	0.000378706	0.00145831	0.000340336	0.000245963	0.000283902	0.000151465	5.68506e-05	3.78775e-05	0.000132378	5.67203e-05	3.78494e-05	0.000113549	0.000110379	0.00017082	0.000416266	0.000170176	0.000151405
FBti0018967	copia{}631	0.0213352	0.0189495	0.0196364	0.4518	0.440032	0.405047	0.48345	0.470201	0.430734	0.0355382	0.036399	0.0457454	0.0274751	0.022846	0.02335	0.0270603	0.0320359	0.026745	0.0580337	0.0447499	0.0485308
FBti0019004	Rt1a{}632	8.46306e-05	0.000225565	0.00014151	8.46623e-05	0	0.000677622	0.000112749	0	0	5.64509e-05	0	0.000169402	5.63851e-05	0	0	8.46391e-05	0	0.000169772	0	0	2.82142e-05
FBti0019901	hopper{}634	0.000124707	0.000540115	0.000437895	0.000457429	0.000353566	0.00174738	0.000373815	0.000893603	0.00062366	0.000561483	0.000270587	0.000291225	0.000270029	0.000353033	8.31454e-05	0.000353371	0.000747632	0.000521178	0.00024939	0.000519212	0.000436536
FBti0019271	S{}635	0.000700258	0.00026246	0.000790355	0.000262695	0.000350357	0	0.000524765	0.000437598	0.00043775	0.000262739	0.000613607	0.000350421	0.000174955	0.000262372	0.000525241	0.000787869	0.000850972	0.000263388	0.000700192	0.000262395	0.000612813
FBti0018892	Cr1a{}638	0.000266402	0.000931925	0.00053454	0.000466379	0.000933017	0.000866546	0.000598917	0.000466137	0.000732756	6.66366e-05	0.000333482	0.000333281	0.00059903	0.000332718	0.000666067	0.000932502	0.000129496	0.000668014	0	0.000931691	6.66101e-05
FBti0018943	Tc1{}641	0	0	0	0.000766194	0	0.00038328	0	0.000127633	0.000255354	0	0	0	0	0	0	0	0	0	0.000255278	0	0.000255339
FBti0019272	S{}642	0	0	0	0	0	0	0	0	0	0.000268884	0	0	0	0	0	0	0	0	0	0	0
FBti0019905	1360{}644	0.00097666	0.00111744	0.00127637	0.000552791	0.00115733	0.00189068	0.000526453	0.00073239	0.000951152	0.000874326	0.00102954	0.000964613	0.000834778	0.000462232	0.000642598	0.00137517	0.00107442	0.000966715	0.00100227	0.00107864	0.00167084
FBti0019907	Doc3{}646	0.00106293	0.00134039	0.00109629	0.00152046	0.00240558	0.00603504	0.00160799	0.0016488	0.00122212	0.00119272	0.00143255	0.00109365	0.000694941	0.000754333	0.000357655	0.0018479	0.00115891	0.00124549	0.00156941	0.00241209	0.00217584
FBti0019908	Doc3-element{}647	0.00109026	0.00112602	0.00171363	0.00116338	0.00123643	0.002146	0.00123462	0.00130812	0.000836035	0.000436339	0.000946251	0.000327351	0.000980619	0.00083515	0.000545179	0.00090864	0.0014839	0.00167677	0.0015989	0.00152519	0.00167197
FBti0018931	Rt1b{}648	0.000240886	0.000525296	0.00037349	0.000722927	0.000701216	0.000504099	0.000481379	0.000613075	0.000284741	0.000460121	0.000438604	0.000526007	8.754e-05	4.37599e-05	0	0.000569423	0.000766423	0.000944483	0.000985348	0.000547046	0.00140172
FBti0018953	ninja-Dsim-like{}649	7.07535e-05	0	0.000283936	0	7.07997e-05	0.000283255	0.000141392	0.00042446	0.000283072	0.000424751	0.000566843	7.08125e-05	7.07092e-05	0.000353465	0	0.000212282	0.000412712	0.000780635	0.000141494	0.00141398	0.000566109
FBti0018923	I{}651	0.000982982	0.000982472	0.00123273	0.00229448	0.00360662	0.00787056	0.000900333	0.000573324	0.00131091	0.00122939	0.00139456	0.000819835	0.000654911	0.000736605	0.000983072	0.00122885	0.000477819	0.00156108	0.00065526	0.00130963	0.00106505
FBti0019273	S{}652	0.000202554	0.000151837	0.000381025	0.00124111	0.00162149	0.0013684	0.000252986	0.000683521	0.000658434	0.00017733	0.000329624	0.000481467	0.000354247	7.58927e-05	0.000202572	0.000177252	0.000344609	0.000203165	0.000253168	0.000252998	0.000379843
FBti0019910	GATE{}654	0.000107496	0.00075208	0.000215691	0	0.000107566	0.000215175	0.000107408	0.000322441	0.000215035	0	0.000215301	0	0.000751999	0.000429615	0.000107506	0.000215013	0.000313516	0.000646919	0.000644913	0	0.000430044
FBti0018906	Doc2-element{}650	0.00355992	0.00452152	0.00424176	0.00464013	0.00540544	0.00637128	0.00225055	0.00265285	0.00249149	0.00254008	0.00254236	0.0024071	0.00242266	0.00217417	0.00191852	0.00415206	0.00446297	0.00462366	0.00426577	0.00468251	0.00498269
FBti0019906	springer{}645	0.000431105	0.000403083	0.000530172	0.000514737	0.000375724	0.00114131	0.000194534	0.000236379	0.000333827	0.000528737	0.000765965	0.000765502	0.00040304	0.000222315	0.000737118	0.000598044	0.000175757	0.000306868	0.000500591	0.00044467	0.000556344
FBti0019904	hopper{}643	0.00129062	0.00128995	0.00148586	0.000994782	0.00086803	0.00186346	0.000803335	0.00105773	0.000994612	0.00118547	0.00103822	0.00120699	0.000866921	0.000761023	0.000634788	0.0015235	0.00133699	0.00146428	0.00112125	0.00221984	0.00181982
FBti0019903	FB{}640	0.000344658	0.000229653	0.00034578	0.000421406	0.000153281	0.000421608	0.000191321	0.000382898	0.000306425	7.66321e-05	7.67009e-05	3.83273e-05	7.65428e-05	0.000114788	0.000229793	0.000268094	0.00029784	0.00046093	0.000114875	0.000420925	0.000421309
FBti0018920	G3{}639	0.000432512	0.000384256	0.000265174	0.000480749	0.000216397	0.000553125	0.000384142	9.61e-05	0.0004326	0.000192331	0.000216567	7.21455e-05	4.80268e-05	0.000144047	9.61226e-05	0.000168216	0.00028032	0.000289211	0.000336367	0.000504209	0.000336446
FBti0018891	Cr1a{}637	1.77088e-05	0.000159297	0.000106599	0.000177155	0.000549332	0.000194963	0.000141555	0.000212475	0.000159412	5.31552e-05	0.000106406	8.8618e-05	3.53955e-05	3.53873e-05	1.77105e-05	0.000159395	8.6081e-05	0.00015986	0.00012395	0.000230038	0.000194825
FBti0019902	1360{}636	0.000222971	0.000289713	0.000380286	0.000289971	0.000200805	0.000133897	0.000289627	8.91758e-05	0.00026762	0.00026771	0.000223292	0.00031242	0.000178266	0.000200503	0.000222992	0.000267592	0.000303476	0.000268372	0.000200655	0.00017824	8.92013e-05
FBti0018983	invader2{}633	0.000247505	0.000705928	0.000557185	0.000332143	0.000549699	0.00155276	0.00033778	0.000265577	0.00049511	0.000398638	0.000344587	0.000271878	0.00034991	0.000295545	0.000295826	0.000428649	0.000352127	0.000375404	0.000283698	0.00034986	0.000380367
FBti0018930	Rt1b{}629	0.00173577	0.00052046	0.000348284	0.000781387	0.000781605	0.00217156	0	0.000694207	0.00121528	0.000868352	0.00112987	0.000173721	0.000346936	0.00043357	0.000347185	0.000260391	0.000928114	0.0012187	0.000954581	0.0019946	0.000954808
FBti0018998	mariner2{}628	0.000943865	0.000628917	0.000670748	0.000550794	0.000511594	0.000944669	0.000392956	7.86441e-05	0.000472028	7.86979e-05	0.000590764	0.000118082	0.000353728	0.000667999	0.000629301	0.000983291	0.000382337	0.000552248	0.000432564	0.00031438	0.000511333
FBti0018950	X{}624	0.00273538	0.00400252	0.00377614	0.00352449	0.00348168	0.00297863	0.00290807	0.00315071	0.00277971	0.00324044	0.00409802	0.00324139	0.00341162	0.00341083	0.00238547	0.00286697	0.00338262	0.00430201	0.00306334	0.00338926	0.00356745
FBti0018909	Doc3-element{}622	0	0.000250474	0	0.000125349	0.000501534	0.000752451	0.000187799	0.000125284	0.000250654	0.000501478	0.000941115	0.000376219	0	0	0	0.000250629	0.000548172	0.000251359	0.000939674	0.000626027	0.0012532
FBti0018982	invader2{}621	0.000696279	0	0.000465698	0	0.000464489	0.000929163	0.000463808	0	0.00023214	0.000232218	0	0.00034843	0.000115974	0	0.000232114	0.000232116	0	0.000116396	0	0	0.000232126
FBti0018908	Doc3-element{}619	0.0109908	0.0140631	0.014276	0.0149255	0.0150094	0.0162346	0.00745388	0.0128208	0.00873603	0.00613588	0.00582236	0.00361353	0.00551851	0.00466843	0.00544282	0.0107264	0.0122595	0.0138199	0.0123967	0.0100804	0.0114703
FBti0018954	baggins{}618	4.99233e-05	8.31624e-05	0.000133562	0.000233063	0.000316387	0.000749488	0.000199531	0.000166387	0.000166445	0.000149851	0.000199981	9.99299e-05	3.32614e-05	6.65074e-05	0.000133141	3.32855e-05	0.000436811	8.34564e-05	0.000199674	0.00019954	0.000149791
FBti0018887	Cr1a{}584	0	0.000110145	0	0	0	0	0	0	0	0	0	0	0	0	0	0	0	0	0	0.000220235	0
FBti0018949	X{}585	0.000246127	0.000394893	0.000253426	3.23972e-05	0.000142587	0.000246336	1.94152e-05	0.000110093	0.000103653	1.2961e-05	6.48633e-05	0.000103719	9.06215e-05	9.06006e-05	3.2388e-05	8.42096e-05	8.18589e-05	0.00016891	0.000110099	7.76644e-05	0.000168426
FBti0018981	invader2{}587	0.000103252	0.000250624	0.000133185	0.000118046	8.85593e-05	0.000236205	0.000117906	8.84888e-05	0.000147533	0.000132824	2.9543e-05	0.0001181	0.00014741	8.84258e-05	2.95032e-05	0.000118014	8.60396e-05	8.87684e-05	2.94977e-05	0.000117911	8.85142e-05
FBti0018901	Doc{}590	0.00291333	0.00322507	0.00303001	0.00364125	0.00337141	0.00359308	0.00340916	0.00366073	0.00307066	0.00437592	0.00452252	0.00421324	0.00290439	0.0029393	0.00368296	0.00277827	0.00292231	0.00298642	0.00302701	0.0029538	0.00378289
FBti0019886	Cr1a{}595	0	0.000103798	0	0	0	0.000311821	0.000415069	0	0	0	0	0.000207877	0	0	0	0	0	0	0	0	0
FBti0019889	Rt1b{}599	0	0	0	0	0	0	0	0	0	0	0	0	0	0	0	0	0	0	0	0	0
FBti0019269	Doc3{}Ir41a[600]	0.000214593	0.000958859	0.000468576	0.000138906	0.000707355	0.00233727	0.000138741	0.000340775	0.000303016	0.000341008	0.000341314	0.000113703	0.000201843	0.000201797	1.26243e-05	0.000164117	0.000245439	0.000265884	0.000100975	0.000252268	0.000201999
FBti0019890	Rt1b{}601	6.11502e-05	0	0.000122699	0	0	0	6.11004e-05	0	6.11627e-05	0	0	0	6.1112e-05	0	0	6.11564e-05	5.94492e-05	0	0	3.05516e-05	0
FBti0019891	Rt1b{}602	0.000158555	0.000193688	0.00019442	0	0	3.52644e-05	0	8.80733e-05	0	3.52534e-05	0	0	0	0	0	8.80947e-05	0	5.30109e-05	0	0	0
FBti0018938	Rt1c{}603	0.00011738	0.000205309	0.000117763	0.000117424	8.80927e-05	0.000264331	0	5.86818e-05	0.000176106	5.87219e-05	0	0	5.86535e-05	0	0	2.9348e-05	5.70575e-05	2.94336e-05	2.93423e-05	0	2.93493e-05
FBti0018889	Cr1a{}607	6.55321e-05	6.54982e-05	1.64364e-05	6.55567e-05	1.63937e-05	0.000114779	0	0	0	6.55675e-05	0	4.91901e-05	0	0	3.27691e-05	3.27693e-05	0	0	4.91445e-05	3.27409e-05	0
FBti0019896	1360{}610	4.12332e-05	0	8.2735e-05	0	8.25202e-05	0	0	0	0	8.2511e-05	0	0	0	0	8.2474e-05	0	0	0	0	0	0
FBti0018907	Doc3-element{}611	0.00107037	0.00140264	0.000763628	0.00111836	0.00149949	0.00299958	0.00068923	0.00126047	0.000570978	0.000499774	0.000881346	0.000595144	0.000309024	0.000451546	0.000475762	0.000666073	0.00127183	0.000930448	0.00123675	0.00102201	0.000880205
FBti0018977	invader1{}613	0.000509392	0.000145465	0.000146014	0.00465904	0.00436906	0.00342312	0.00603501	0.00647562	0.00604116	0.000509667	0.00043725	0.000291324	0	0	0.000218331	0.000363888	0.000636713	0.000802886	0.00043658	0.000509	0.00145561
FBti0019898	gypsy{}615	0.000233896	0.000229673	0.000164672	0.00244246	0.00183954	0.00192615	0.00130383	0.0012924	0.00109174	0.00367867	0.00635305	0.00200004	0.00448225	0.00167687	0.00491227	0.000209296	0.000191486	0.000139938	0.0005375	0.000168112	0.000114913
FBti0019270	gypsy11{}612	0.000181998	0.000363807	3.04317e-05	0.000303443	0.000910582	0.000607176	0.000272774	0.0006369	0.000303391	0.000364192	0.000243013	0.000273224	0.000212198	0.000272763	0.000455036	0.000333696	5.89783e-05	0.000304244	0.00012132	0.000272787	0.000121349
FBti0019032	springer{}609	8.25776e-05	8.25347e-05	0	8.26085e-05	0	0.000495888	8.25103e-05	8.25657e-05	0.000165189	0.000165244	0.000165393	0	8.25259e-05	8.25069e-05	8.25851e-05	0	0.000160561	0	8.25698e-05	0.000165028	0.000247768
FBti0019893	Rt1b{}605	0.000411158	0.00141325	0.00103627	0.00020064	0.000632191	0.00130478	0.000350702	0.00025067	0.000521575	0.000341144	0.000190811	0.000170622	0.000260571	0.000310609	0.000110321	0.000441287	0.000458216	0.000382222	0.000561529	0.00038078	0.000401187
FBti0019888	Helena{}598	0.000184334	0	0	3.68806e-05	0.000147563	0	7.36734e-05	0	0.000110623	0	0	0	7.36874e-05	0	0	0	0.000107524	7.39558e-05	0.000184316	7.36768e-05	0
FBti0019003	Rt1a{}597	0.000235031	0.000352364	0.000176847	0	0.000176388	0.00059984	5.87098e-05	1.17499e-05	0.000141047	2.35158e-05	0	2.35227e-05	2.34884e-05	0	0	0	6.85478e-05	4.71479e-05	2.35009e-05	3.52275e-05	2.35065e-05
FBti0018899	DM88{}Ir41a[593]	0.000217587	0.000463945	0.000261955	0.000304736	0.000319336	0.000769463	0.000202916	0.000333586	0.000536824	0.00015965	0.0002179	0.000362948	0.000144967	0.000144934	8.70428e-05	0.000304653	0.000437171	0.000363739	0.0006527	0.000362366	0.000188603
FBti0018888	Cr1a{}592	0.000185734	0.000293112	0.000284411	0.00022492	0.000332582	0.000498973	0.000166047	0.000273673	0.000185771	0.000420572	0.000234949	0.000215239	0.000107463	0.000136739	0.000273738	0.000371504	0.000313616	0.000313758	0.00032256	0.00033211	0.00034219
FBti0018952	ninja-Dsim-like{}589	0.0020828	0.00303301	0.002288	0.00225669	0.00260983	0.00254231	0.00245162	0.00187857	0.00213886	0.00213958	0.00246334	0.00110722	0.00117972	0.0015623	0.00129182	0.00110022	0.00118968	0.00104144	0.00035843	0.000741078	0.000655217
FBti0019267	S{}588	0.000481198	0.000480949	0.000402304	0.000722067	0.00080252	0.000481608	0.000721209	0.000240564	0.000481296	0.000722187	0.000803151	0.0002408	0.00120224	0.000560917	0.000320828	0.000641662	0.000311875	0.000884856	0.000561345	0.000560966	0.000320845
FBti0019884	R1A1{}583	0.00075181	0.0013776	0.000377129	6.26743e-05	0.000125384	0.00087786	0.000375599	0.000689061	0.00100262	0.000940271	0.000376446	0.000877844	0.000125223	0.000250389	0	0.000125314	0.000121816	0	0	0	0
FBti0019883	R1A1{}582	0.00291774	0.00814256	0.00505093	0.000251821	0.00191781	0.00416848	0.00152056	0.00162455	0.00301561	0.0010189	0.000922416	0.000641293	0.000806165	0.000868857	0.000137318	0.000629379	0.00136823	0.00074598	0.000348952	0.000794616	0.000160213
FBti0019275	1360{}709	0.00019567	0.000111753	8.41315e-05	0.000363522	0.00027971	0.000279766	0.000614461	0.000363334	0.000251626	0.000419519	0.000223944	0.000307737	0.000223483	0	0.000167732	0.000307512	0.000407628	0.00019626	0.000559003	8.37939e-05	0.000167741
FBti0019946	rover{}716	0	0	0	0.00781217	0.00578562	0.00826682	0.00382641	0.00202711	0.00435604	0.000601036	0.000300788	0.000601212	0.000300168	0.000225074	0.000150192	0.000750964	0.001606	0.00112973	0.000750818	0.00165069	0.00120159
FBti0018912	F{}731	0.000632415	0.000827578	0.000699884	0.000345676	0.000658924	0.00138989	0.000429952	0.000469354	0.00048908	0.00035878	0.000411335	0.000476338	0.000436549	0.000260567	0.00018257	0.000612917	0.00050707	0.000444679	0.000475896	0.000429972	0.000371679
FBti0018939	Rt1c{}734	0.000250433	0.000750909	0.000446664	0	0.000222752	0.000473443	0.000111213	0	0.000222652	2.78409e-05	0	2.78491e-05	0	0.00013901	0	0	0	0.000139549	2.78232e-05	0	8.34895e-05
FBti0018885	Circe{}737	0.00111497	0.00233627	0.0013798	0.000226475	0.000889162	0.00195428	0.000565515	0.000469693	0.000764223	0.000288804	0.000232384	0.000141612	0.000446841	0.00035626	0.000130186	0.000650937	0.000627264	0.000544975	0.000254665	0.000463743	0.000305671
FBti0019007	Rt1a{}743	0.00035871	0.000644128	0.000475771	0.000170299	0.00025552	0.000888412	0.000182246	0.000151974	0.000273648	0.00027374	0.000231366	0.000152123	0.000206585	0.00015794	6.68843e-05	0.000310102	0.000206875	0.00013416	0.000139823	0.000249081	0.000158098
FBti0019972	invader3{}751	0.000643267	0.000547891	0.000606078	0.00050921	0.00055413	0.00048706	0.00530402	0.00572146	0.00548287	0.00545113	0.0060386	0.005895	0.00088883	0.0011513	0.000895062	0.000565012	0.000609058	0.000639596	0.00299231	0.0032474	0.00271889
FBti0018886	Circe{}753	0.000463916	0.000624178	0.000492278	0.000517638	0.000714182	0.000982197	0.00027634	0.000606572	0.000455087	0.000473093	0.000410978	0.000392871	0.000534952	0.000329811	0.000214135	0.000472884	0.000572436	0.000671126	0.000374666	0.000508132	0.000463982
FBti0019036	transib2{}754	0.000352465	0.000535469	0.000424336	0.00043722	0.000437342	0.00104419	0.000450788	0.000436994	0.000324334	0.000479612	0.000494161	0.000324539	0.000450873	0.000338077	0.000451197	0.000549901	0.000274128	0.00050908	0.000296043	0.000436721	0.000366616
FBti0018959	flea{}756	0.0177884	0.0108867	0.0154566	0.104845	0.103417	0.135978	0.0801348	0.076735	0.076	0.0139093	0.0112436	0.0174862	0.0120545	0.0165071	0.00969923	0.0182228	0.019627	0.0160517	0.0182558	0.0219932	0.0165176
FBti0018980	invader1{}757	0	0	0.000147769	0.00117876	0.000663237	0.000884492	0.00117736	0.00110451	0.0022098	0	0	0	0	0.000147164	0	0.000368261	0.000286385	0	0.000294552	0.000294353	0
FBti0019276	S{}758	0.000582707	0.0012354	0.000797188	0.000847891	0.00114851	0.00116641	0.000599876	0.000953384	0.000529842	0.000689026	0.000831111	0.000812936	0.000970571	0.000846849	0.000724036	0.00081234	0.00103	0.00085013	0.000988743	0.00100572	0.00116558
FBti0018913	F{}755	0.000384011	0.000826172	0.000620336	0.000319044	0.000631752	0.00147873	0.000396705	0.000416495	0.000416639	0.000253975	0.00036501	0.000182395	0.000338239	0.000240614	0.000195278	0.000670459	0.00063276	0.000391697	0.000644297	0.000429241	0.000533787
FBti0019969	1360{}747	0.00101759	0.00114049	0.0011448	0.00132929	0.00149278	0.00151285	0.000710743	0.000884087	0.000578067	0.000998367	0.00114272	0.000687197	0.00088366	0.000824231	0.000553302	0.00178837	0.00211302	0.00203635	0.00178308	0.00156469	0.00212439
FBti0019968	S{}746	0.000840575	0.00109039	0.00114834	0.00118082	0.00175383	0.00162888	0.00039314	0.000911982	0.000429317	0.00121681	0.000949247	0.000751779	0.00139412	0.00100068	0.000840652	0.00193173	0.00205167	0.00184767	0.00155581	0.00150115	0.00205702
FBti0019967	Rt1b{}745	0.000846306	0.00114192	0.000730193	0.00031325	0.000499646	0.000906319	0.000363615	0.000380783	0.000474028	0.000728216	0.000584791	0.000830072	0.00101493	0.000600363	0.000473975	0.000651721	0.0006253	0.000305589	0.00052466	0.000693437	0.000516321
FBti0019966	S{}744	0	0	0	0	0	0.000143955	0	0.000143812	0	0	0	0	0	0	0	0	0	0	0	0	0
FBti0019963	GATE{}740	0.00319484	0.00518893	0.00372038	0.0045087	0.00416743	0.00439666	0.00273621	0.00216762	0.00251075	0.00159829	0.00217105	0.000742279	0.00410509	0.00307811	0.00308102	0.00199698	0.00105381	0.00160224	0.00102682	0.000969118	0.00262471
FBti0019957	BS{}729	0.000134236	6.70831e-05	7.3458e-05	8.54548e-05	0.000170957	0.000164884	4.26766e-05	4.8806e-05	8.54402e-05	8.5469e-05	0.000134429	6.10672e-05	9.14672e-05	3.0482e-05	6.10219e-06	4.88179e-05	0.000118638	6.12002e-05	0.000103718	0.000134133	0.000115948
FBti0018933	Rt1b{}725	6.00711e-05	0	6.02667e-05	6.00936e-05	0	6.01223e-05	0	0	3.00417e-05	0	6.01576e-05	0	0	0	0	9.01157e-05	5.84001e-05	6.02522e-05	0	3.00125e-05	0
FBti0019954	NOF{}724	0	6.10576e-05	0.000245153	0	1.52823e-05	6.11414e-05	3.05197e-05	3.05403e-05	0	6.11223e-05	1.52943e-05	3.05701e-05	0	3.05185e-05	3.05474e-05	6.10954e-05	0	0	6.10835e-05	1.52606e-05	4.58235e-05
FBti0019951	GATE{}721	0.000381591	0.00092624	0.000765666	0.000599867	0.00038184	0.000763832	0.000326811	0.000436041	0.000218096	0.00021817	0.000163774	0.000109117	0.000435831	0.000217865	0.000436144	0.00032711	0	0	0.000109016	0.000217884	0.000109041
FBti0019949	GATE{}719	0	0.000100891	1.68787e-05	0	6.73394e-05	6.73529e-05	6.72407e-05	3.36429e-05	3.36546e-05	3.36659e-05	0.000235873	3.36758e-05	5.044e-05	3.36189e-05	0	0.000100953	8.17793e-05	6.74984e-05	6.72891e-05	0.000100866	6.73051e-05
FBti0018932	Rt1b{}710	0.000166501	0.000366113	0.000434314	0.000266502	0.000266576	0.000599916	0.000532371	0.000199773	0.000133228	0.000599729	0.000266786	0.000599905	0.000565751	0.000166359	0.000466247	6.66073e-05	6.47479e-05	0.000300606	0.000332972	0.000266198	0.00019983
FBti0018876	BS{}759	0.000241231	0.000723316	0.000968064	0.00144792	0.000482776	0.00144862	0	0.000964784	0.00024128	0.000241361	0.000724733	0.000724295	0	0.000723072	0	0.000241255	0	0.000483916	0.000482416	0.00096418	0.000723795
FBti0019040	opus{}760	0.000769469	0.000789416	0.000943525	0.000460225	0.000403318	0.000631584	0.000695619	0.000826348	0.000696328	0.00123833	0.00109675	0.00104719	0.000589964	0.000516608	0.000826543	0.000321662	0.000320599	0.000289931	0.000659483	0.000667174	0.000745148
FBti0019973	HB{}761	0.000187607	0.000225012	0.000301149	0.0005818	0.000619508	0.000826176	0.000449891	0.000262613	0.000243939	7.50835e-05	9.39387e-05	0.000168987	0.000112494	0.000149957	0.000431536	0.000318964	0.000218866	0.00020699	0.000206349	0.000262448	0.000168871
FBti0018917	F{}863	0.000762648	0.00100982	0.000745512	0.000678163	0.000926211	0.00170274	0.000475452	0.000514876	0.00061937	0.00034566	0.000574441	0.000554523	0.000436457	0.000312613	0.000202088	0.000547597	0.000602018	0.000483813	0.000469277	0.000351721	0.000482427
FBti0019027	roo{}862	0.000289371	0.000423742	0.000313943	0.000249087	0.000464642	0.000693734	0.00018155	9.08359e-05	0.000269237	0.000228928	0.000188699	0.000185217	0.000171496	0.000171457	0.000225461	0.000228828	0.000238796	0.000253119	0.000312895	0.000282424	0.000242298
FBti0019043	opus{}861	0.00045246	0.000630735	0.000573389	0.000214403	0.000190634	0.000452845	0.000237943	0.000404774	0.000381096	0.000416964	0.000357719	0.000190668	0.000226088	0.000190346	0.000333422	0.000190528	9.26048e-05	0.000191084	0.000190491	0.00030934	0.000273896
FBti0018966	blood{}856	0.0015252	0.00201189	0.0020029	0.00119085	0.00112914	0.0012121	0.00263079	0.0023474	0.00217871	0.00407353	0.00353081	0.00369828	0.00379203	0.0040059	0.00275719	0.00172791	0.00247129	0.00142201	0.00100017	0.00163554	0.00108722
FBti0018940	S2{}857	0	0	0	0	0	0	0	0	0	0	0	0	0	0	0	0	0	0	0	0	0
FBti0018993	jockey{}858	0.000849958	0.000679614	0.000776928	0.00110536	0.00157817	0.00112479	0.000528432	0.000519344	0.000585646	0.00191816	0.00254409	0.00142723	0.00189705	0.00176451	0.00227621	0.0026068	0.0025983	0.00256704	0.002323	0.00209495	0.00238022
FBti0018970	copia{}860	0.0228224	0.0202628	0.0217973	0.479103	0.465738	0.432689	0.49184	0.489747	0.445204	0.0412121	0.0430324	0.0511428	0.0292243	0.026397	0.0254929	0.0325871	0.0368189	0.0303583	0.0670552	0.053602	0.0567603
FBti0019001	mdg1{}859	0.00166615	0.00184846	0.00179276	0.00229598	0.00175893	0.00213865	0.00198526	0.00200742	0.00199562	0.000720998	0.000638218	0.000654508	0.00139869	0.00166472	0.00143718	0.00269526	0.00219888	0.00185918	0.0013203	0.00167735	0.00138727
FBti0018880	Bari1{}Jheh[Bari1855]	0.000442977	0.000814655	0.000337759	0.000283611	0.000319151	0.000407886	0.00023016	0.00092126	0.000620294	0.000460945	0.000461359	0.00023054	0.000460408	0.000177039	7.08828e-05	0.000194929	0.000775177	0.00028436	0.000354348	0.000460342	0.000407597
FBti0018965	blood{}852	0.00162831	0.00169356	0.00180776	0.00103358	0.00111244	0.00109612	0.00230834	0.00243386	0.00198827	0.00357678	0.0029923	0.00343307	0.00321329	0.00405078	0.00226497	0.00158301	0.00231024	0.00162079	0.00100417	0.00148666	0.00119868
FBti0018869	3S18{}853	0.0639114	0.0602867	0.0657892	0.0862586	0.0870778	0.0779565	0.0502265	0.0542279	0.0511975	0.0682613	0.0604448	0.0633945	0.061434	0.0597071	0.0544706	0.0731695	0.0727935	0.0694929	0.0706217	0.0675527	0.0673095
FBti0019026	roo{}854	0.000333516	0.000390583	0.000236587	0.000350491	0.000333733	0.000826071	0.000154841	0.000191997	0.000202172	0.000144939	0.000276643	0.000252874	0.000185171	0.000222153	0.000208888	0.000222366	0.000281661	0.000229772	0.000336853	0.000245737	0.000215637
FBti0019996	roo{}850	0.00608124	0.00675076	0.00656267	0.00662969	0.00672431	0.00678408	0.00676248	0.006331	0.0064328	0.00839672	0.00849367	0.00797304	0.00761824	0.0068617	0.00844446	0.00645274	0.00610236	0.00617535	0.00756736	0.00706131	0.00805339
FBti0019994	Stalker4{}847	0	0	0	0	0	0	0	0	0	0	0	0	0	0	0	0	0	0	0	0	0
FBti0018916	F{}848	0.00061192	0.0010864	0.000928947	0.000555767	0.000950707	0.00183733	0.000571197	0.000539379	0.000732843	0.000660587	0.000532169	0.000668839	0.000313815	0.000313743	0.000225465	0.00090992	0.000665346	0.000436096	0.000483049	0.000651677	0.000483164
FBti0018992	jockey{}846	0.000225267	0.0004503	0.000113	0.000225351	0.000338121	0	0.000225083	0.000225234	0.000450625	0	0.000225591	0.000112727	0	0.000675222	0.000563218	0.000337934	0.000547501	0.000225946	0	0.000225093	0.000337948
FBti0019012	pogo{}843	0.000426986	0.000240055	0.000776433	0.00168189	0.00184258	0.00194979	0.00181321	0.00221467	0.00229552	0.00451248	0.00310011	0.00395292	0.00373379	0.00317299	0.00242871	0.00688584	0.00734223	0.00698622	0.00573709	0.00509323	0.00405695
FBti0018867	297{}845	0.000444004	0.000443774	0.000519691	0.000148057	0	0.000740637	0	7.399e-05	0	0	0	0	0.000295817	0.000665436	0.000740074	0.000148016	0.000431653	7.42238e-05	0.000295975	0	0
FBti0019013	pogo{}844	0.00164711	0.00214013	0.00214822	0.00148296	0.00197782	0.00131881	0.00279781	0.00197625	0.00164745	0.0021424	0.00346391	0.00131879	0.0019753	0.0032914	0.00296507	0.00131782	0.00144116	0.000991247	0.000823478	0.000164584	0.000329469
FBti0018991	jockey{}841	0	0.000445064	0.000178698	0	0	8.91349e-05	0.000177973	0.000534277	0.000356308	0	0.000535123	0.000713066	8.90032e-05	0	0	0.000178136	0.000259744	0.000267982	8.90505e-05	0.000444952	0.000267215
FBti0018915	F{}842	0.000613509	0.00105025	0.000687534	0.000417864	0.000744528	0.00148282	0.000593445	0.0004307	0.000652802	0.000352632	0.000477134	0.000378864	0.000339175	0.000247802	0.000280673	0.000633152	0.000374363	0.000641544	0.000391564	0.000423909	0.000561376
FBti0018969	copia{}840	0.0207834	0.017964	0.0195848	0.473158	0.465021	0.425549	0.471019	0.469538	0.426822	0.0399928	0.0408396	0.0514387	0.027321	0.0242394	0.0239171	0.0313479	0.0364921	0.0294388	0.0655588	0.0517192	0.0541898
FBti0018972	diver{}839	0.000304764	0.000399483	0.000300744	0.000309876	0.000484941	0.00064505	0.000439301	0.000434601	0.000414763	0.000444896	0.000415276	0.000375022	0.000334531	0.000304503	0.00042471	0.000894397	0.00102	0.000471052	0.000749349	0.000818735	0.000524669
FBti0018990	jockey{}838	0.00121705	0.00116702	0.00130159	0.00126077	0.00145894	0.00181785	0.000740745	0.000710358	0.000877442	0.00106318	0.00151577	0.0010573	0.00146942	0.00162957	0.00149519	0.0015817	0.00169971	0.00191473	0.00150727	0.00132723	0.00189689
FBti0018968	copia{}837	0.0233028	0.0190226	0.0211113	0.507363	0.48884	0.454727	0.536283	0.539343	0.48376	0.0475949	0.0532841	0.0620677	0.0335415	0.0293918	0.0300562	0.0354515	0.0401168	0.0340037	0.0737021	0.0612195	0.062935
FBti0018884	Burdock{}836	0.000404361	0.000392264	0.000787492	0.000951793	0.0015947	0.00126173	0.000475331	0.000630237	0.000440129	0.000951951	0.00120292	0.00101175	0.00161643	0.00167547	0.00133213	0.000214095	0.000254367	0.000143146	0.000118918	4.75353e-05	2.37893e-05
FBti0018948	Tirant{}834	0.000172457	0.000118503	0.000133369	9.34492e-05	0.000183355	0.000280482	0.000215396	0.000172432	8.98396e-05	3.23532e-05	5.03724e-05	6.11295e-05	0.000147215	0.000154361	0.000114982	0.000366508	0.000614752	0.000486498	0.000301771	0.000290797	0.000391677
FBti0019993	1360{}835	0.000220088	8.79896e-05	0.000220805	0.000924716	0.00149758	0.000528662	0.000571763	0.000924238	0.000572346	0.00030829	8.8162e-05	4.40544e-05	0	0	0	0.000176088	0.000256759	4.41504e-05	8.8027e-05	0	0.000440239
FBti0018866	297{}832	0.000232226	0.000293416	0.000189023	0.000236696	0.000241146	0.000385911	9.6317e-05	0.000140192	0.000170918	0.000219199	0.000140414	0.00015787	0.000289006	0.000306451	0.000205955	0.000135844	0.000200207	0.000210952	0.000140199	0.000131347	0.00013585
FBti0018947	Tirant{}833	9.81815e-05	0.000145379	0.000149576	0.000163697	0.000105523	0.000236564	0.000148969	0.000116347	9.09273e-05	5.45748e-05	2.54911e-05	7.27877e-05	0.00019624	0.000159863	9.81905e-05	0.000385492	0.000551491	0.000459562	0.000287245	0.00021438	0.000381872
FBti0019000	mdg1{}831	0.00124342	0.00133421	0.00146442	0.00170982	0.00144397	0.00153582	0.00185322	0.00193762	0.00163881	0.00070318	0.000637179	0.000511932	0.00120523	0.00147088	0.00118946	0.00227081	0.00166972	0.00146406	0.000885694	0.00138374	0.000977407
FBti0018989	jockey{}830	0.000123037	0	0	0.00036925	0.000369353	0.000123142	0	0.000369059	0.000246125	0	0	0.00036942	0.000491841	0.000491728	0.000246097	0.000246099	0.000119615	0.000123408	0	0.000245885	0
FBti0019025	roo{}828	0.000336884	0.000373748	0.00036502	0.000363971	0.000441607	0.00080584	0.000225529	0.00016505	0.000151629	0.000212352	0.000239532	0.000222529	0.000306373	0.000201958	0.000128028	0.000320072	0.000258735	0.00027032	0.000245902	0.000235638	0.000363887
FBti0019992	1360{}829	8.31002e-05	0.000221486	0.000222322	0	8.31544e-05	0.000221789	0.00022142	0	8.31171e-05	5.54301e-05	2.77399e-05	0.000110893	0.000221462	0	5.54052e-05	0.000138514	0.000161577	0.000111134	0.00011079	5.53575e-05	0.000110816
FBti0018905	Doc{}827	0.00173266	0.00191337	0.00186851	0.00278498	0.00242861	0.0029227	0.00154321	0.00155073	0.0016746	0.0023634	0.00315187	0.00230565	0.00221149	0.00171172	0.00237532	0.00186912	0.00182956	0.00182901	0.00182334	0.00173133	0.0021418
FBti0018945	Tc1{}826	0	4.12674e-05	0	0	4.13157e-05	0.000247944	0	8.25657e-05	0	0	0	8.26465e-05	0.000288841	8.25069e-05	0.000206463	0.00028905	0.000120421	0.00012424	4.12849e-05	0.000247542	8.25894e-05
FBti0019008	Rt1a{}822	0.000240347	0.000368342	0.000128603	0	9.62017e-05	0.000256589	6.40404e-05	9.61251e-05	0.000160264	6.41273e-05	9.62773e-05	0	0.000112092	3.20189e-05	3.20492e-05	0.000112173	3.11548e-05	9.64288e-05	3.20433e-05	6.40433e-05	0.000128204
FBti0018921	HMS-Beagle{}824	0.00117849	0.0014406	0.00134055	0.000679308	0.000732103	0.0010918	0.000792313	0.00103377	0.000806266	0.00337957	0.00289562	0.00317887	0.00334498	0.00387386	0.00366723	0.00073608	0.000668682	0.000830504	0.00113895	0.000914923	0.0014065
FBti0019042	opus{}821	0.000979297	0.00101504	0.000764156	0.000391059	0.00050005	0.000625187	0.000732867	0.000914685	0.000693306	0.00126611	0.00114618	0.000867179	0.000777309	0.000495269	0.000842353	0.000314374	0.000211568	0.000274868	0.000640714	0.000736928	0.000761784
FBti0018988	jockey{}820	0	0	0.00046394	0.000346956	0.000115684	0.000231414	0.000577572	0.000231184	0.000809425	0.000462684	0.0009262	0.00023141	0.000693217	0.00150163	0	0	0	0.000231914	0	0.000346559	0.00023125
FBti0018904	Doc{}819	0.00168545	0.00172993	0.00209416	0.00260694	0.00253631	0.00296503	0.00200794	0.00215836	0.00145886	0.00263332	0.00305116	0.00229672	0.00232576	0.00180059	0.00232743	0.00177638	0.00234441	0.00144996	0.00215199	0.00180075	0.00199689
FBti0018987	jockey{}817	0.000739918	0.000788429	0.000785272	0.000991005	0.00114426	0.00119957	0.000470473	0.000275137	0.000525999	0.00113801	0.00169018	0.00136479	0.00132002	0.00125862	0.00170625	0.0017613	0.00163485	0.0016683	0.00179765	0.00135649	0.00188981
FBti0018951	accord{}818	0.00138376	0.00220936	0.00172945	0.0361145	0.0353031	0.0600455	0.0322166	0.0335807	0.0386125	0.00099145	0.000992341	0.00115019	0.00155869	0.000960775	0.000920638	0.000756454	0.0020122	0.00135853	0.00126638	0.0020096	0.000879636
FBti0019021	roo{}815	0.000232316	0.000316966	0.00034406	0.000284049	0.000321027	0.000668018	0.000173174	0.000117985	0.000180727	0.000125445	9.97075e-05	0.000210366	0.000136354	0.000173167	0.000165956	0.000280283	0.000179249	0.000240414	0.00022492	0.000217399	0.000243414
FBti0019022	roo{}816	0.000276667	0.000350263	0.000321979	0.000335815	0.000317452	0.000605495	0.000136378	0.00020286	0.000191862	0.00025098	0.000229041	0.000273206	0.000202762	0.000176915	0.000166015	0.000188152	0.000251039	0.000192401	0.000291395	0.000239594	0.000295154
FBti0018937	Rt1b{}814	0.000574706	0.001193	0.000901827	0.000339056	0.000663556	0.00154861	0.000456446	0.00055989	0.00078117	0.000560273	0.000634563	0.000575186	0.000544893	0.000456427	0.000117899	0.000633714	0.000945525	0.000606	0.000589387	0.000588989	0.000663218
FBti0019020	roo{}813	0.000596583	0.000245524	0.000264055	0.0005617	0.000280928	0.00070246	0.000262984	0.00017544	0.000122851	0.00017556	0.000351436	0.000351224	0.000245498	0.000298036	0.000157933	0.000263225	0.000289993	0.00031679	0.000228084	0.000280529	0.000210589
FBti0019011	pogo{}812	0.00101942	0.000777576	0.0011304	0.00185175	0.00139591	0.00128879	0.00260008	0.00260183	0.00214659	0.0048046	0.00483578	0.00504766	0.00343169	0.00289482	0.0026561	0.00772691	0.00732865	0.00699601	0.00579406	0.0047447	0.00598325
FBti0019041	opus{}811	0	0	0	0	0	0	0	0	0	0	0	0	0	0	0	0	0	0	0	0	0
FBti0018961	flea{}810	0.0254057	0.0183765	0.0244648	0.113362	0.11238	0.146941	0.0959762	0.0908252	0.0902028	0.0188777	0.0143544	0.0213712	0.0215914	0.0279539	0.0159662	0.0170155	0.0191878	0.0152562	0.01689	0.021538	0.0157946
FBti0018878	BS{}809	0	0	0	0	0	0	0	0	0.000237539	0	0	0	0	0	0	0	0	0	0	0	0.000237525
FBti0018862	17.6{}804	0.00184782	0.00201848	0.00207122	0.0033167	0.00355079	0.00350649	0.00202196	0.00236259	0.00211398	0.00148478	0.00211659	0.00134202	0.000894735	0.000804668	0.000952616	0.00222824	0.00170899	0.00239875	0.00338055	0.00352532	0.00340997
FBti0018865	297{}805	0	0.000148283	0.000297686	0	7.42283e-05	0.000222729	0.000148239	7.41692e-05	0	0	7.42866e-05	0.000148483	0	0.000148233	0	0	0	0.000446421	0.000296691	0	0.000148381
FBti0019010	pogo{}808	0.00197653	0.00164626	0.00446168	0.000494318	0.00148337	0.000824258	0.00230408	0.000988125	0.00214168	0.000824001	0.00346391	0.000989091	0.00082304	0.00213941	0.00148254	0.000164728	0.000480388	0	0.000823478	0.000329169	0.000658939
FBti0018986	jockey{}807	0.000546967	0.000608108	0.000450096	0.000811535	0.000854809	0.00111332	0.000393004	0.000423992	0.000534784	0.00100844	0.0010832	0.00100258	0.000921277	0.00099475	0.00110018	0.0011678	0.00110533	0.00120819	0.00105696	0.000994837	0.00105721
FBti0019019	roo{}806	0.000379761	0.000349333	0.000313564	0.000262234	0.00034638	0.000659262	0.000268638	0.000154571	0.000235298	0.000178214	0.000195202	0.000225356	0.000208234	0.000204828	0.00016469	0.00025544	0.00023524	0.000232588	0.000201624	0.000228353	0.000272257
FBti0019987	mdg1{}799	0.000737937	0.000535321	0.0009911	0.00127401	0.00105999	0.00116741	0.00107033	0.00096394	0.00114284	0.000452528	0.000500612	0.000655167	0.000630422	0.000772981	0.000630875	0.00252352	0.00181666	0.00142063	0.000916383	0.00147474	0.000940409
FBti0018946	Tirant{}797	0.000183236	0.000154413	0.000219878	0.000132985	0.000136618	0.000345208	0.000140007	0.000129324	0.000107808	3.95428e-05	2.15882e-05	4.31502e-05	0.000226208	0.000190258	0.000111389	0.000309016	0.000677624	0.000565779	0.000373622	0.000226176	0.000391677
FBti0019018	roo{}796	0.000225341	0.000245393	0.000340799	0.00030281	0.000444245	0.000706895	0.000218436	0.000245485	0.000195111	0.000215367	0.000191984	0.000205332	0.000221839	0.000211706	0.000215271	0.000262363	0.00025177	0.000249634	0.000322846	0.000168036	0.000265739
FBti0019984	S{}792	0	0.000148643	0.000149204	0	0	0.000297693	0.000148599	0.000148698	0	0	0	0	0	0	0	0	0.000144583	0	0	0	0
FBti0019985	roo{}793	0.000705905	0.00134052	0.00106231	0.000776786	0.000494456	0.00162497	0.000352665	0.000282321	0	0.000423772	0.000424153	0.000282598	0.000423278	0.00049371	0.000564776	0.00105896	0.000892148	0.000283213	7.05838e-05	7.05362e-05	0.000635405
FBti0018877	BS{}794	0	0	0	0	0	0	0	0	0	0	0	0	0	0.000233665	0	0	0	0	0	0	0
FBti0019279	1360{}795	0.000110901	0.000166265	0.000417231	8.32065e-05	0.000554865	0.000360734	0.000360133	0.000415817	0.000277308	0.000277401	0.00016659	0.000138741	0.000221662	0.000304715	0.000166366	0.000277279	5.39078e-05	0.000250279	0.000166335	0.00036015	0.000221833
FBti0018861	17.6{}790	0.00179468	0.00193676	0.00221477	0.00375838	0.00367352	0.00334692	0.00209957	0.00220317	0.00165193	0.00150524	0.00227216	0.00119472	0.00109493	0.000690299	0.000928085	0.00240405	0.00184411	0.00239465	0.00309849	0.00308415	0.00332002
FBti0019278	roo{}785	0.000175238	0.00026272	0.000192713	0.000293296	0.000360821	0.000782496	0.000191931	0.000208907	0.000114602	0.000158474	0.000222737	0.000192248	0.000212174	0.000121215	0.000107848	0.000299956	0.000226059	0.000189287	0.000272941	0.00019194	0.000252783
FBti0018883	Burdock{}783	0.000363068	0.000577743	0.000527205	0.00052569	0.000707489	0.000736318	0.000448692	0.00068782	0.000640277	0.000530557	0.000464057	0.00059765	0.00109807	0.00102145	0.000888643	0.000143331	0.000195062	0.000129374	0.000195847	0.000210036	0.000172004
FBti0019017	roo{}784	0.000858961	0.00128777	0.000646319	0.000930889	0.000429761	0.000143282	0	0.000286279	0.000429568	0.00057295	0	0.000931317	0.000357676	0.000929745	0.00085904	0.000143174	0.0006263	0.000430775	0.000286293	0.00014305	0.000357952
FBti0019978	1360{}780	0.000206074	0.000102983	0.000103372	0.000171792	0.00017184	0.000412499	0	0	0.00013741	6.87283e-05	6.87901e-05	0.000103123	6.86482e-05	0.000171581	0.000171744	0	0.000133561	0.000275593	0.000137369	6.86384e-05	0.000137402
FBti0019009	pogo{}781	0.0014824	0.00148163	0.00330495	0.00197727	0.00148337	0.00197822	0.00115204	0.00164688	0.000658979	0.000988801	0.00181443	0.00230788	0.00164608	0.00148113	0.00148254	0.000494183	0.000800646	0.000330416	0.000494087	0.000329169	0.000494204
FBti0018971	diver{}782	0.00023478	0.000569171	0.000430996	0.00044475	0.000409883	0.000744937	0.000658844	0.000509449	0.000324762	0.00057977	0.000650326	0.000444954	0.000334477	0.000269516	0.00038967	0.000759364	0.000874144	0.000636318	0.000864108	0.00108315	0.000794369
FBti0019016	roo{}775	0.000142826	0.000285505	0.000429875	0.00042864	0.000928978	0.000500319	0.00042813	0.000499821	0.000571422	0.000285807	0.000286064	0.00050031	0.000142737	0.000142704	0.000214259	0.000571363	0.000555413	0.000429771	0.000214219	0.000570866	0.000428541
FBti0018903	Doc{}776	0.0015974	0.0015122	0.0016938	0.00266982	0.00255361	0.00286607	0.00177777	0.00187635	0.0017471	0.00252083	0.00304333	0.00252158	0.00186246	0.00197233	0.00227293	0.00215605	0.00200117	0.00183668	0.00199981	0.00179082	0.00191585
FBti0018926	I{}777	0.000557023	0.000389714	0.000726488	0.000891571	0.00195085	0.00139375	0.000890511	0.000946804	0.00105856	0.000390127	0.000278912	0.000836232	0.000946347	0.000389582	0.000612782	0.000612787	0.000487375	0.00122915	0.000891153	0.000890552	0.00111421
FBti0018936	Rt1b{}779	0.000647506	0.00109094	0.000983702	0.000259099	0.000684953	0.00142573	0.000369702	0.000536428	0.000666141	0.000388713	0.000352009	0.000222187	0.000351283	0.000443624	0.000222022	0.000518056	0.00084532	0.000705126	0.000462461	0.000647008	0.000536582
FBti0019277	S{}778	0.00101744	0.00158187	0.00215493	0.000716245	0.000980397	0.000867448	0.000903655	0.00180852	0.00116841	0.00128191	0.00177365	0.00154629	0.00131808	0.000941268	0.00101753	0.00165822	0.00139212	0.00181424	0.00139414	0.00105431	0.000979898
FBti0019977	297{}774	0.000263013	0.00026757	0.000353396	0.000155048	0.000117493	0.000376053	8.44709e-05	5.63518e-05	0.000136231	3.75935e-05	0.000141102	0.000141017	0.000187749	0.000168935	8.92446e-05	0.000192582	4.566e-05	0.000188433	0.000154975	0.000122019	0.000112736
FBti0018882	Burdock{}770	0.000754918	0.000969423	0.000886801	0.000908152	0.00106618	0.000994663	0.000811591	0.000888573	0.00066905	0.000435029	0.000540686	0.000554706	0.00119374	0.00111231	0.0011277	0.000119461	0.000297283	0.000244411	0.000167213	0.000152777	0.00028194
FBti0018960	flea{}771	0.0173437	0.0112642	0.0148394	0.102639	0.103953	0.136417	0.0814678	0.0761076	0.0770297	0.0141958	0.0110483	0.0178215	0.0121336	0.0163306	0.0100099	0.0185944	0.0204266	0.0165344	0.0186456	0.0220662	0.0167735
FBti0019976	FB{}773	0.00109359	0.00165516	0.00125389	0.000406344	0.000875447	0.00179815	0.000421471	0.000593581	0.000250015	0.000390781	0.000688392	0.000265809	0.000686972	0.000280969	0.000374981	0.000843715	0.0010328	0.00115957	0.000843551	0.000842981	0.000906251
FBti0018902	Doc{}772	0.00151266	0.00184929	0.00158272	0.0026173	0.00265051	0.00300841	0.00159576	0.00175911	0.00172725	0.00213706	0.00292565	0.00233261	0.00227082	0.00184867	0.00252566	0.00203873	0.00167255	0.00184281	0.00193447	0.00168665	0.00190246
FBti0018925	I{}769	0.00225609	0.00316166	0.00305384	0.00451387	0.0040015	0.00350052	0.00198589	0.00220803	0.00250131	0.00112865	0.000794952	0.000609294	0.00276765	0.00221242	0.00389778	0.000644662	0.000649876	0.000796203	0.000757927	0.00103176	0.000853617
FBti0018999	mariner2{}767	0.00115315	0.0016821	0.00203239	0.00118475	0.00155932	0.000998165	0.000591673	0.00155808	0.00115338	0.00190216	0.000936329	0.00137245	0.00130816	0.00177495	0.00105974	0.00158963	0.00145436	0.001563	0.00109071	0.000934264	0.00233779
FBti0018927	Juan{}768	0.000159112	0.000267459	0.00015963	0.000311108	0.000166453	0.00044155	0.000238473	0.00021694	0.000195313	0.00277149	0.00295505	0.00299669	0.00330312	0.00261587	0.0022784	0.000556947	0.00066093	0.000478775	0.000795485	0.000816628	0.00081014
FBti0019975	297{}766	0.000223335	0.000367655	0.000311929	0.000179611	0.000201571	0.000355011	0.000113764	0.000113841	0.00012702	0.000144589	0.000171031	0.000162162	0.000258206	0.000280023	0.000148903	0.000148905	0.00011069	0.000210831	0.000157633	9.62664e-05	0.000140152
FBti0019974	hopper{}762	0.000192278	0.000213531	0.000150036	0.000256466	0.000192403	0.000342119	0.000106734	0.000128167	4.27371e-05	0.000192382	0.00012837	8.55281e-05	8.54034e-05	0	2.13662e-05	0.000427327	0.000290779	0.000257143	0.000555417	0.000426956	0.000405978
FBti0018985	jockey{}765	0.000757658	0.000616805	0.000447493	0.000867966	0.000794837	0.00117415	0.000286943	0.000329901	0.000323904	0.000990379	0.001132	0.000703253	0.000885417	0.000891318	0.00105104	0.0013077	0.00124744	0.00165471	0.00106307	0.00125162	0.00114887
FBti0019015	roo{}764	0.000147405	0.000278729	0.000239813	0.00024311	0.000390678	0.000546261	0.000115439	0.000163317	0.00021916	0.000103638	0.000179534	0.000171451	0.000199071	0.000147279	0.000151402	0.000151404	0.000189781	0.000199796	0.000143407	0.000270698	0.000199224
FBti0018914	F{}763	0.000494343	0.000578602	0.000476376	0.000572612	0.000520701	0.00137362	0.000441947	0.000227625	0.000370833	0.000423022	0.00031918	0.000208318	0.000357525	0.000233962	0.000221174	0.000865187	0.00103707	0.000658937	0.000500801	0.000617454	0.000618018
FBti0019492	F{}1516	0.00272322	0.00286974	0.00285088	0.00248735	0.00195489	0.00222191	0.00224779	0.00284122	0.00198362	0.00316894	0.00349786	0.00388087	0.00408228	0.00301664	0.00248665	0.00242746	0.00440286	0.00403777	0.00426204	0.00310564	0.00444068
FBti0019493	R1A1{}1519	0.00200508	0.00418085	0.00340587	2.76667e-05	0.000947847	0.00199295	0.000462866	0.000629091	0.00105807	0.000255959	0.000180025	0.000214515	0.000414585	0.000359224	3.45736e-05	0.000345738	0.000806609	0.000471575	0.000131355	0.000324712	4.14904e-05
FBti0020427	mariner2{}1522	0	0	0	0	0	0	0.000109718	0	0.000439319	0	0.000109965	0	0	0	0	0.000109818	0	0	0	0	0
FBti0020428	mariner2{}1523	0.00149939	0.00182264	0.0016669	0.00154049	0.000932664	0.00190626	0.00105277	0.000769849	0.000405324	0.00178403	0.00194796	0.00194678	0.00210594	0.000445384	0.00210745	0.00190483	0.000709144	0.00178844	0.00166133	0.00279402	0.00158067
FBti0019497	Tc1{}1529	0.000717237	0.000716865	0.000462582	0.00148626	0.000666441	0.000769124	0.000614274	0.00102448	0.000563658	0.00169154	0.000666964	0.000717836	0.000716788	0.00107493	0.000512359	0.00133215	0.000597673	0.000924943	0.000614717	0.000614302	0.0013322
FBti0020434	1360{}1533	0.00940464	0.00878767	0.00948614	0.015398	0.015656	0.0142888	0.0107455	0.0112793	0.0107097	0.00919897	0.00920723	0.00939297	0.00956638	0.00952521	0.00812985	0.0101039	0.0102503	0.0102429	0.0104608	0.0111241	0.0109548
FBti0020433	FB{}1532	0.00610073	0.0062964	0.00818297	0.00842481	0.0100197	0.00836247	0.00874609	0.00782373	0.008755	0.00736464	0.00551184	0.00431389	0.00927791	0.00689057	0.00557074	0.00497392	0.00883206	0.0065182	0.00649799	0.0049696	0.00590264
FBti0019498	Tc1{}1531	0.00147335	0.00128559	0.0021351	0.0014739	0.0013807	0.0014746	0.00116837	0.00259553	0.00154382	0.00142735	0.00180335	0.00173204	0.00170614	0.00112159	0.00130976	0.00163722	0.00125047	0.00138396	0.00121598	0.00135537	0.00194135
FBti0020432	1360{}1530	0.00113468	7.08805e-05	0.000142296	0.000496607	0.000496745	0.000496844	0	0.000425443	0.000638386	0.000496689	0.000355097	0.000212929	0.000566983	0.000354283	0.000425543	0.00063832	0	0.00064018	0.000141821	0.000141726	0.000496492
FBti0020430	R1A1{}1527	0.00156251	0.00223099	0.00139964	0.000446597	0.000837603	0.00156384	0.000836374	0.000613754	0.000948857	0.00111668	0.00100591	0.00122871	0.00172883	0.00161692	0.000613898	0.000390666	0.000651017	0.00111944	0.00039059	0.0010037	0.000781365
FBti0019495	Tirant{}1524	0.000111392	0.000150839	0.000155014	0.000158163	0.000161803	0.000345249	0.000190288	0.000122154	0.000129384	5.03331e-05	2.51891e-05	5.03478e-05	0.000262145	0.000201051	0.000204836	0.00043483	0.000625304	0.000356807	0.00042756	0.000215431	0.000431255
FBti0020426	jockey2{}1521	0.000283669	0.000472537	0	0.000662143	0.00113542	0.000378548	0.000944793	0.00160723	0.000283727	0.000662252	0.00075754	0.000851718	0.000661481	0.000377902	0.00018913	0	0.000183852	0.000284524	0.00122912	0.000850353	0.00122941
FBti0019494	1360{}Eph[1520]	0.00465325	0.00254207	0.00379851	0.00419238	0.00471412	0.00404975	0.00470721	0.0043636	0.00375804	0.00508953	0.00382057	0.00439679	0.00517025	0.00418722	0.00491381	0.0045959	0.00365276	0.00443536	0.00404592	0.00303239	0.0036711
FBti0020425	FB{}Pur-alpha[FB]	0.00983554	0.00981539	0.0116809	0.00860367	0.00839506	0.00685909	0.00874394	0.0109034	0.00988274	0.0115136	0.0116447	0.00860762	0.0132012	0.0108354	0.0117344	0.0116442	0.0130031	0.0127205	0.00981955	0.0106257	0.0111475
FBti0020424	HB{}1517	0.000421373	0.000817535	0.000223806	0.000570306	0.00017362	0.00250558	0.000371496	0.000396529	0.000347083	0.0002232	0.000521268	0.000148844	0.00022294	0.000198123	0.000247889	0.00027268	0.000506039	0.000248614	0.00034698	0.000470584	0.000247902
FBti0019482	Cr1a{}1495	0	0	0	0	0	0	0	0	5.13275e-05	0	0	0	0	0	0	0	0	0	0	0	0
FBti0020414	1360{}Syt7[1502]	0.00175782	0.0013386	0.00109172	0.00108858	0.00167521	0.000753993	0.000808495	0.00147859	0.000893042	0.000223336	0.000670609	0.000446803	0.00142211	0.00055756	0.00111618	0.00220447	0.00235994	0.0022109	0.00153446	0.00108734	0.0014232
FBti0020415	1360{}1503	2.6594e-05	5.31604e-05	5.33612e-05	0.000106416	0.000106445	0.0001597	0	5.31803e-05	0.000106398	0.000292692	0.000186426	0.000186313	0.000292351	0.000371997	0.000106386	0.000132983	5.17084e-05	0	5.3183e-05	5.31471e-05	5.31956e-05
FBti0020416	Stalker2{}1505	3.01872e-05	9.05148e-05	2.64998e-05	6.03971e-05	3.02069e-05	7.17558e-05	0.000214909	0.000365968	0.000286837	0.000498359	0.000529037	0.000456963	4.52525e-05	2.2621e-05	7.17013e-05	0.000241522	0.000337496	0.000310352	0.00026034	0.000203607	0.000271724
FBti0020417	rooA{}1506	0.000416987	0.000710962	0.000332215	0.000478488	0.000441804	0.0014607	0.000465664	0.000245251	0.000515206	0.000269961	0.000233357	0.000306864	0.000441239	0.000220569	0.000245309	0.000367966	0.000381541	0.000332135	0.000282053	0.000306372	0.000208523
FBti0019486	S{}1511	5.08486e-05	0.000254111	0.00017855	0.000152603	0.000203527	0.000203568	0.000152421	0.000152524	0.000279724	0.000305256	2.54609e-05	5.0891e-05	0.000127042	0.000152415	0.000127133	0.000101707	0.000148302	2.5501e-05	2.54219e-05	0.000101619	0.000228851
FBti0019489	S{}1513	0	0	0.000166591	0.000166112	0	0	0	0	0	0	0	0	0	0	0	0	0.000161431	0	0	0	0
FBti0020422	1360{}1514	0.00207079	0.00187125	0.00216291	0.00153239	0.00141927	0.00161829	0.00212579	0.00207049	0.00141863	0.00334911	0.00511339	0.00264032	0.00430907	0.00303266	0.00343271	0.00201425	0.00261989	0.00182096	0.00192877	0.00155898	0.00192923
FBti0020423	1360{}1515	0.000526301	0.000221486	0.000472435	0.000166263	0.000249463	0.000609921	0.000304452	0.000276961	0.000304763	0.000194005	0.000360619	0.000471294	0.000498289	0.000470498	0.000249323	0.000664868	0.000323154	0.000722373	0.000166185	0.000249109	0.000692601
FBti0020421	jockey{}1510	0.00102806	0.000565141	0.000876699	0.000257112	0.000514367	0.000720258	0.000205445	0.000719541	0.00056555	0.000822895	0.00102954	0.000823136	0.000873307	0.000924465	0.0013366	0.00030845	0.000349812	0.000670256	0.000462585	0.000359545	0.000771158
FBti0020420	jockey{}1509	0.00063928	0.000786398	0.000542691	0.000491938	0.000688905	0.000689042	0.000589624	0.000737525	0.000491854	0.000344414	0.000344723	0.000492164	0.000982893	0.000491333	0.000885238	0.000491803	0.000812726	4.93237e-05	0.000442537	0.000393101	0.000688554
FBti0020419	1360{}1508	0.000674808	0.000449639	0.000631872	0.000630056	0.000765281	0.000945536	0.000224753	0.000314865	0.000134989	0.000135034	0.000495571	0.000315173	0.000494549	0.00067423	0.000179965	0.000449917	0.000830979	4.51228e-05	8.99659e-05	0.000359621	0.000179975
FBti0020418	1360{}1507	0.00181688	0.00144022	0.00138281	0.00156686	0.00175537	0.0014422	0.001252	0.00175397	0.00181724	0.00125369	0.00200771	0.00125406	0.0010644	0.000938959	0.000751879	0.00194237	0.00140089	0.00207371	0.00187935	0.00156507	0.00213043
FBti0019485	1360{}1504	0.00421783	0.00299083	0.00457467	0.00410537	0.00365023	0.00356539	0.00279061	0.00527153	0.00319252	0.00575988	0.0056509	0.00467771	0.00475633	0.00449897	0.00364819	0.00410425	0.0054858	0.00360168	0.00336255	0.00415763	0.00530155
FBti0020412	Tc1{}1500	0.00325918	0.00152016	0.00145324	0.00152152	0.00224668	0.00166722	0.00101314	0.00130348	0.00188346	0.00123191	0.00210338	0.0010873	0.00130286	0.000940734	0.00130379	0.0013038	0.00133782	0.00138025	0.0018829	0.00209874	0.0015936
FBti0019484	1360{}1498	0.00130006	0.00163836	0.00175797	0.00192255	0.00189481	0.00183861	0.00214618	0.00217588	0.00144167	0.000763493	0.000792482	0.00101829	0.00220308	0.00115776	0.00268516	0.00398538	0.00313227	0.00331665	0.00245858	0.00240044	0.00392901
FBti0019483	Cr1a{}1497	0	0	0	0	9.27572e-05	9.27758e-05	0	4.63417e-05	0	0	9.28301e-05	0	4.63194e-05	0	0	0	0	0	0	9.26255e-05	0
FBti0020410	rooA{}1496	0.000403825	0.000589551	0.000332306	0.000431211	0.000522137	0.000967282	0.000299222	0.000385621	0.000363063	0.000281469	0.000445301	0.000208893	0.000335555	0.000185873	0.000363022	0.00020874	0.000330836	0.000177491	0.000244994	0.00022216	0.000263205
FBti0019480	S{}1493	0.000274765	0.000411933	0.000597262	0.000641358	0.00068736	0.00105416	0.00155573	0.00164835	0.0027024	0.00100802	0.000825481	0.0014208	0.000869544	0.00109812	0.00082437	0.000457987	0.000578763	0.00101051	0.000641057	0.00141853	0.00128242
FBti0020407	G4{}1489	0	0	0	0	0	0	0	0	0	0	0	0	0	0	0	0	0	0	0	0	0
FBti0020402	McClintock{}1478	0.000295037	0.000799041	0.000353288	0.000152334	0.000280944	0.000885866	0.00134085	0.00159392	0.00166587	0.000219017	0.000290696	0.000295283	9.51137e-05	5.70551e-05	3.80728e-05	0.000309344	0.000356224	0.000295927	0.000242669	0.000252015	0.00029032
FBti0020404	1360{}1480	0.000104205	0.000499925	0.000334542	0.00016679	0.000396237	0.000292023	0.000249888	0.00020838	0.000125071	0.000625568	0.000647001	0.000438026	0.000645667	0.000353994	0.000458544	0.00027096	0.000283657	0.000438981	0.000500137	0.000458149	0.000166752
FBti0020405	1360{}PlexB[1481]	0.00032898	0.00032881	8.25128e-05	0.000329103	0.000164597	0.00016463	4.1089e-05	0.000205583	0	0.000164579	0.00024709	8.23136e-05	0.000287677	0.000164349	8.22526e-05	0.000164507	0.000479743	8.2493e-05	0.000164475	0.000123273	0.000205642
FBti0019473	I{}1483	0.00312184	0.00404431	0.00395079	0.00517837	0.00435173	0.0042612	0.00197879	0.00307004	0.00324806	0.00131908	0.000977336	0.000965322	0.00339937	0.00277703	0.00408103	0.00087329	0.000804524	0.000801418	0.00089024	0.000946667	0.00101032
FBti0019476	I{}1487	0.000761696	0.00146404	0.00122709	0.00100376	0.00144377	0.00326929	0.000995252	0.00101057	0.000966964	0.00128239	0.00118819	0.00116549	0.0007539	0.000585418	0.000666545	0.00197035	0.00216456	0.00233605	0.00209447	0.00202719	0.00184591
FBti0019475	S2{}1486	0	0	0	0.000173151	0	0.000346468	0	0	0	0.00017318	0.000693342	0	0	0	0.000173102	0	0.000252407	0	0	0	0
FBti0019474	Tc1{}1485	0.00187729	0.00242357	0.00238041	0.00156499	0.0019046	0.000991635	0.00224049	0.00208557	0.00130394	0.00148699	0.00224554	0.00195714	0.00211063	0.00161517	0.00190353	0.00106912	0.00103927	0.00109839	0.00122534	0.00143294	0.00117347
FBti0020406	G5{}1484	0.0126393	0.0139149	0.0143082	0.0166071	0.0153659	0.0137074	0.0156449	0.0157686	0.0143401	0.0192146	0.0240682	0.0185784	0.0194185	0.0172276	0.0187532	0.0133953	0.0157357	0.0140398	0.0149017	0.0146655	0.016641
FBti0019472	1360{}ci[1482]	0.00129118	0.00146649	0.00120707	0.00105682	0.00117457	0.00132165	0.000762351	0.00108561	0.00108599	0.00190846	0.00105794	0.00126289	0.000938455	0.001466	0.000851086	0.00120327	0.00156908	0.00108904	0.000968297	0.000967643	0.00108592
FBti0020403	1360{}1479	0	8.34343e-05	0	0.000194854	0	0.000417744	0.000111213	8.34656e-05	5.5663e-05	0.000167045	0.00013933	8.35472e-05	2.78085e-05	8.34061e-05	0	5.56573e-05	0.000108207	5.58195e-05	0.000166939	5.56089e-05	0.000333958
FBti0019502	1360{}1539	0.0094813	0.00882186	0.0114546	0.129455	0.136158	0.122137	0.0997997	0.105304	0.100984	0.0147282	0.0134013	0.0119114	0.00862173	0.00546202	0.00723265	0.0142946	0.0130098	0.0153358	0.0294377	0.0213663	0.0236639
FBti0019507	1360{}1543	0.000825617	0.000943073	0.00127204	0.00129788	0.00188836	0.00147557	0.00170881	0.00144462	0.00106172	0.000236018	0.000442931	0.000531196	0.00103138	0.000913293	0.000737225	0.000117957	0.000429991	0.000414053	0.000471736	0.000441955	0.000412867
FBti0020437	1360{}1545	0.000740162	0.000836271	0.00122686	0.000772632	0.00138468	0.00103067	0.000900333	0.00115835	0.000289688	0.000643967	0.000773455	0.000611948	0.000514573	0.000450148	0.000643678	0.00099771	0.000657001	0.00048417	0.00077227	0.000385875	0.000643711
FBti0020438	1360{}1546	0.0018928	0.00332419	0.00385218	0.00181236	0.00194815	0.00192147	0.00305303	0.00283879	0.00392159	0.00430168	0.00362857	0.00305806	0.00440476	0.00318798	0.00265016	0.00457021	0.00520498	0.00569551	0.00435302	0.00429605	0.00503015
FBti0019509	R1A1{}1547	0.000380103	0.000151962	0	0	5.07134e-05	0.000101447	0.000455751	0.000304039	0.000278799	0	0.00030452	0.000152168	2.53243e-05	0	5.0685e-05	0.000101371	4.92705e-05	0.000101666	0.000253378	0.000405131	0.000658939
FBti0020439	HB{}1548	0.000279146	0.000383627	0.00056011	0.000383969	0.000453908	0.00069846	0.000488107	0.0005931	0.000383904	0.000768066	0.000489209	0.00059368	0.000348714	0.000174317	0.000104689	0.000348967	0.000407071	0.000139994	0.00041868	0.000383531	0.000628168
FBti0019510	Tc1{}1549	0.00432688	0.00442405	0.00469024	0.00238814	0.00288647	0.00388258	0.00417427	0.00372953	0.00343236	0.00363256	0.00413388	0.00423093	0.00372773	0.00278273	0.00323302	0.00502366	0.00406146	0.00608587	0.00601727	0.00477081	0.00641663
FBti0019511	Tc1{}1550	0.000852222	0.000371289	0.000745382	0.000961841	0.000634117	0.0009623	0.000393012	0.00102689	0.000961676	0.00102759	0.00107228	0.000590492	0.000764336	0.000589495	0.00104898	0.000874161	0.00091349	0.00116164	0.000808442	0.000611381	0.000939763
FBti0019513	mariner2{}1553	0.000281713	0.000492742	0.000141315	0.000140909	0.000140948	0.000634394	0.000211112	0.000281672	7.04425e-05	0.000634196	0.000775825	0.000211461	0.000492689	0.000140736	0	0	0	7.06406e-05	0.000140843	0.000140748	0.000140877
FBti0019516	1360{}1558	0.000297702	0.000432797	0.000814559	0.00027074	0.000243734	0.000487565	0.00029746	0.00016236	0.000324832	0.000406177	0.00048785	0.000325037	0.000865501	0.00040561	0.000460128	0.000514265	0.000657775	0.000705782	0.000974207	0.000486775	0.00116391
FBti0019519	Cr1a{}1563	0.000660366	0.000966463	0.000993775	0.000912276	0.000778797	0.00107008	0.000526291	0.000660271	0.000589733	0.000582066	0.00075579	0.000755334	0.000510678	0.000659801	0.000715462	0.000542498	0.00101649	0.00100142	0.000581696	0.000754124	0.000707637
FBti0020446	1360{}1565	0.000888008	0.000998491	0.00105794	0.00117983	0.00123569	0.000916539	0.000720918	0.000832388	0.000915944	0.000513657	0.000486328	0.000430488	0.000915185	0.000609983	0.000582809	0.000901973	0.00121402	0.000807184	0.000721438	0.000776409	0.000874258
FBti0020450	Cr1a{}1569	0.000168177	0.00016809	0.000393691	5.608e-05	0.00025243	0.000140267	0.000140033	0.000308281	0.000168211	0.000252402	0.000196489	0.000280529	8.4036e-05	0.000140028	0.000168193	0.000168194	0.000463247	0.000112456	0.00044843	0.000168048	8.41006e-05
FBti0020451	1360{}1570	0.00154729	0.00261496	0.00254017	0.00309573	0.00329365	0.0030409	0.00208011	0.00163145	0.00298265	0.000422215	0.000338076	0.000112624	0.00157443	0.00140542	0.00151929	0.000928465	0.00131279	0.00112869	0.000872025	0.000421663	0.000787822
FBti0020453	F{}1572	0.0042812	0.00415882	0.00507242	0.00785069	0.00767242	0.00792797	0.00631312	0.00641086	0.00639972	0.000661572	0.00110361	0.000728611	0.00373119	0.00344338	0.0029724	0.000781514	0.00101293	0.000884278	0.000681187	0.000700749	0.000875066
FBti0020452	1360{}1571	0.00133325	0.00113409	0.00170756	0.00320666	0.00204375	0.00210094	0.0022675	0.00207049	0.00232656	0.000652792	0.000539747	0.000369078	0.001786	0.00116205	0.000539021	0.000425546	0.000496401	0.000426787	0.000368735	0.000481867	0.000539049
FBti0019518	1360{}1561	9.0819e-05	0.00045386	0.000607432	0.000423981	0.000242342	0.00024239	0.000151242	0.000181612	0.000121117	0.000181736	0.000576015	0.000242386	0.000453811	6.04942e-05	0.000484412	0.000393588	0.000412032	0.000273278	0.000272431	9.07492e-05	0.00045416
FBti0019517	Cr1a{}1559	0.00115921	0.00223446	0.00161987	0.00186371	0.00223708	0.00426787	0.00144783	0.000952072	0.00128367	0.00120126	0.0016584	0.00182314	0.00157223	0.000992758	0.00161476	0.0018632	0.00213318	0.00186863	0.0023182	0.00219253	0.00207031
FBti0020442	Tc1{}1557	0	0	0	0	0.000670082	0.000167554	0	0.000167387	0.000167445	0	0	0.000167551	0	0	0	0.000334856	0.000162754	0	0	0	0
FBti0020441	Tc1{}1556	0.00242091	0.00141325	0.00163352	0.00122162	0.000986146	0.00132942	0.00126298	0.00164941	0.00197141	0.00248652	0.00197384	0.00205842	0.00214106	0.00143418	0.00109272	0.00205691	0.0026035	0.00221332	0.00218504	0.0019909	0.00287122
FBti0019515	Doc3{}Kif3C[1555]	0.000378226	0.00134673	0.000557328	0.000437487	0.00157303	0.00461355	0.000555066	0.000389989	0.00054381	0.000496689	0.000887742	0.000508665	0.000307116	0.000531424	0.000118206	0.000283698	0.000321741	0.000604615	0.00053183	0.000283451	0.000449207
FBti0019514	Cr1a{}1554	0	0.000262836	0	0	0	0	0.000262758	0	0.000328782	0	0.000395026	0.00032899	0	0	0	0.000131499	0	0	0	0	0.00026301
FBti0020440	HB{}1552	0.00027192	0.000181186	0	0	4.53495e-05	0.00163291	0	4.53134e-05	0.000181317	0	0	0	9.05832e-05	0	0	0	0.000704948	0	0	9.05702e-05	4.53264e-05
FBti0019512	S{}1551	0	0	0	0	0	0.000138744	0	0	0	0	0	0	0	0	0	0	0	0	0	0	0.000138646
FBti0019508	Tc1{}1544	0.00252256	0.00383668	0.0034844	0.00171891	0.00208521	0.00150019	0.00171686	0.00413055	0.00310813	0.00274339	0.00439337	0.00278079	0.00263059	0.00288567	0.0013528	0.00361968	0.00337647	0.00440028	0.00332654	0.00420103	0.00372953
FBti0019504	invader4{}1541	0.00367794	0.00387474	0.00330098	0.20277	0.212575	0.176552	0.145419	0.163337	0.15372	0.0102242	0.0130805	0.0112719	0.0035465	0.00247304	0.00306192	0.00993144	0.00739286	0.00903314	0.021837	0.0164288	0.0186707
FBti0019503	invader1{}1540	0.00290391	0.0021768	0.00422438	0.12949	0.139333	0.120906	0.116062	0.135013	0.121263	0.00828062	0.0119232	0.00842837	0.00326486	0.00261128	0.00377543	0.0119072	0.00825766	0.00968462	0.0235921	0.0227056	0.0205481
FBti0019501	transib3{}1538	0.0213756	0.0237736	0.0250725	0.202066	0.216339	0.192418	0.218589	0.25739	0.22449	0.0299547	0.0354762	0.031011	0.0188584	0.016224	0.0157319	0.0285142	0.0305857	0.0362636	0.0617742	0.0467113	0.0528758
FBti0019499	Bari1{}1534	0.000301399	0.000584764	0.000337954	0.000141888	0.000283854	0.000745266	0.000194864	0.000141814	0.000195062	0.00047895	0.000656929	0.000266162	0.000212619	0.000301141	0.000336888	0.000141849	0.000293014	0.000213393	8.86383e-05	0.000318882	0.000141855
FBti0020435	HB{}1535	0	0	4.394e-05	0	0	4.38347e-05	2.18808e-05	6.56867e-05	0	0	4.38604e-05	0	0	2.18799e-05	0	0	4.2579e-05	0	0	0	0
FBti0019500	1360{}1536	0.00113059	0.000854394	0.00110661	0.0050206	0.00579461	0.00458142	0.0042156	0.00614843	0.00623331	0.00179337	0.00212636	0.00110394	0.000936977	0.00140514	0.00093765	0.00118586	0.00142084	0.00118932	0.0016268	0.00214923	0.00206845
FBti0020436	Bari2{}1537	0.000537479	0.00081859	0.000667616	0.0126227	0.0133433	0.0210308	0.00557499	0.00542519	0.00652785	0.000563377	0.00169165	0.00135763	0.000971972	0.00107404	0.00125423	0.00148461	0.000995289	0.00141193	0.0015611	0.00117643	0.00133109
FBti0059983	297{}1922	0	0	0	0	0	0	0	0	0	0	0	0	0	0	0	0	0	0	0	0	0
FBti0059984	INE-1{}1923	0	0	0.000268437	0	0	0.000133897	0	0.000133764	0	0	0	0.000133894	0.000133699	0	0.00026759	0	0	0.000805117	0	0	0.000802812
FBti0059985	INE-1{}1924	0	0	0.000295539	0	0	0	0	0	0	0	0	0	0	0	0	0	0	0	0	0	0
FBti0059986	1360{}1925	0	0	0	0	0	0	0	0	0	0	0	0	0	0	0	0	0	0.000284524	0	0	0
FBti0059987	INE-1{}1926	0	0.0003002	0	0	0	0	0	0	0	0	0	0	0	0	0.000300383	0.000600771	0	0.000301261	0	0	0
FBti0059988	INE-1{}1927	0.000166955	8.34343e-05	8.37494e-05	0	8.35321e-05	8.35487e-05	0	0.000250397	8.34946e-05	0.000167045	0	0	0.000333701	0.000166812	0.00016697	0	0	0.000418646	0.000166939	0.000166827	0
FBti0059990	INE-1{}1929	0	0	0	0	0	0	0	0	0	0	0	0	0	0	0	0	0	0	0	0	0
FBti0059991	INE-1{}1930	0	0	0	0	0	0	0	0	0	0	0	0	0.000514573	0	0	0	0	0	0	0	0
FBti0059992	gypsy4{}1931	0	0.000162442	0	0	0	0	0	0	0	0	0	0	0	0	0	0	0	0	0	0	0
FBti0059993	G6{}1932	0	0.000174475	8.75671e-05	0.000174631	0.00017468	0.000611501	0.000174423	0.000174541	0.000349202	0	0	0	0	0	0	0.000174583	0	0	8.72746e-05	0.000174431	0
FBti0059994	Stalker2{}1933	0	0	0	0	0	0	0.000297197	0	0	0	0	0.000297688	0	0	0	0	0	0	0	0	0
FBti0059995	gypsy8{}1934	0	0	0	0	0	0	0	0	0	0	0	0	0	0	0	0	0	0	0	0	0
FBti0059996	INE-1{}1935	0	0	0	0	0	0	0	0	0	0	0	0	0	0	0	0	0	0	0	0	0
FBti0059998	X{}1937	0.00140856	0.000703917	0	0.00140909	0.000352371	0.00105732	0	0.000352091	0	0.00105699	0.000705296	0.00140974	0	0	0.00246521	0.000704353	0.000342345	0.00211922	0	0.00140748	0.00316972
FBti0059999	INE-1{}1938	0	0	0	0	0	0	0	0	0	0	0	0	0	0	0	0	0	0	0	0	0
FBti0060000	INE-1{}1939	0	0	0	0	0	0.000174714	0	8.72703e-05	0.000174601	0.00017466	0	0.000262067	0	0	0.000174582	0	0	0	0	8.72157e-05	0
FBti0060001	INE-1{}1940	0	0	0.000442245	0	0	0	0	0.000440746	0	0	0	0	0	0	0	0	0.000214274	0	0	0	0.000220436
FBti0060002	INE-1{}1941	0.0006758	0.00022515	0.000452001	0.000225351	0	0.000450918	0.000450166	0	0	0.000450777	0.000902364	0.000225455	0.000675377	0.000225074	0.000450575	0.000225289	0.001971	0	0	0.000450187	0
FBti0060003	INE-1{}1942	0	0	0	0	0	0	0	0.000220373	0	0	0	0	0	0	0	0	0	0	0	0	0
FBti0060004	INE-1{}1943	0.00312036	0.00226818	0.00512267	0.0034053	0.00397396	0.00312302	0.00170063	0.00311991	0.00170236	0.00397351	0.00397708	0.00141953	0.0034019	0.000850279	0.00255326	0.00226958	0.00275778	0.00426787	0.00340371	0.00283451	0.00397194
FBti0060005	INE-1{}1944	0.00337518	0.00363293	0.00338617	0.00441535	0.00441658	0.00519702	0.00155651	0.0064898	0.00181778	0.00935171	0.00442005	0.00103938	0.00285414	0.00466933	0.00415445	0.00519311	0.00328129	0.00494783	0.000778815	0.00441031	0.00493367
FBti0060006	INE-1{}1945	0.00403109	0.0042976	0.00242653	0.00349492	0.00484046	0.00215175	0.00349076	0.0018809	0.00322553	0.00537769	0.0061899	0.00511031	0.00537142	0.00537018	0.00188135	0.00295643	0.00444148	0.00566054	0.00349328	0.00349092	0.00564433
FBti0060007	INE-1{}1946	0.00833401	0.00574866	0.00883219	0.00504924	0.00657759	0.00634394	0.00586423	0.00762863	0.00457877	0.0111572	0.010697	0.00998565	0.00774226	0.00785775	0.00586956	0.0100957	0.00912921	0.00718179	0.00845059	0.00750657	0.0082178
FBti0060009	INE-1{}1948	0.000303329	0	0	0	0	0	0.00151541	0	0	0	0	0	0	0	0.000303357	0	0	0	0	0	0
FBti0060010	INE-1{}1949	0	0	0	0	0	0	0	0	0	0	0	0	0	0	0	0	0	0	0	0	0
FBti0060011	gypsy8{}1950	0	0.000208302	0.000209089	0	0	0	0	0	0	0	0	0	0	0	0	0	0	0	0	0	0
FBti0060012	gypsy8{}1951	0	0	0	0	0	0.000154082	0	0	0	0	0	0	0	0	0	0	0	0	0	0	0
FBti0060013	gypsy8{}1952	0	8.23129e-05	0.000413119	8.23864e-05	8.24093e-05	8.24258e-05	0	0	8.23723e-05	0	0	0	0	0	0	0	8.00646e-05	0.000330416	8.23478e-05	0	8.23674e-05
FBti0060014	INE-1{}1953	0	0	0	0	0	0	0	0	0	0	0	0	0	0	0	0	0	0	0	0	0
FBti0060016	INE-1{}1955	0.0226708	0.0220467	0.0233594	0.0247225	0.0235031	0.0175798	0.0159179	0.0189918	0.0173641	0.0263614	0.0177946	0.0179883	0.0181661	0.0187742	0.0177707	0.0189964	0.0222387	0.0251975	0.0255278	0.0187758	0.0220613
FBti0060017	INE-1{}1956	0	0	0.000117313	0	0	0	0	0	0.000467825	0.000116996	0.000234201	0	0	0.000116832	0	0	0.000227359	0	0	0	0
FBti0060018	INE-1{}1957	0	0	0	0	0	0	0	0	0	0	0	0	0	0.000342012	0	0	0	0	0	0	0
FBti0060019	INE-1{}1958	0	0.000187855	0	0.000188023	0	0.000188113	0	0.000187926	0	0	0	0	0	0	0	0	0	0	0	0.000187808	0
FBti0060020	INE-1{}1959	0	0.000827578	0	0	0.00016571	0.000165743	0	0.000165578	0	0	0.00016584	0.00016574	0	0	0	0	0	0	0	0	0
FBti0060021	INE-1{}1960	0	0	0	0	0	0	0	0	0	0	0	0	0	0	0	0	0	0	0	0	0
FBti0060022	BS3{}1961	0	0.000111347	0.00044707	0.000668678	0.000222955	0.000222999	0.000111314	0.000334166	0	0.00022293	0.000111565	0	0	0	0	0	0	0.000111741	0.000111394	0	0.000111421
FBti0060023	1360{}1962	0	0	0	0	0	0	0	0.000336614	0	0	0	0	0	0	0	0	0	0	0	0	0
FBti0060026	1360{}1965	0	0	0	0	0	0	0	0	0	0	0	0	0	0	0	0	0	0	0	0	0
FBti0060027	HMS-Beagle2{}1966	0	0	0	0	0	0	0	0	0	0	0	0	0	0	0	0	0	0	0	0	0
FBti0060028	1360{}1967	0	0	0	0	0	0	0	0	0	0	0	0	0	0	0	0	0	0	0	0	0
FBti0060029	Rt1a{}1968	0	0	0	0	0	0.000222191	0	0.00022197	0	0.000222122	0.000444643	0	0.000443726	0	0	0	0.000431653	0	0	0	0
FBti0060030	1360{}1969	0	0	0	0	0	0	0	0	0	0	0	0	0	0	0	0	0	0	0	0	0
FBti0060031	Rt1a{}1970	0	0	0	0	0	0	0	0	0	0	0	0	0	0	0	0	0	0	0	0	0
FBti0060032	Doc2{}1971	0	0	0	0	0	0	0	0	0	0	0	0	0	0	0	0	0	0	0	0	0.000113484
FBti0060033	INE-1{}1972	0.000290012	0.00052475	0.000551814	0.000380158	0.000585406	0.000920823	0.000344733	0.000384961	0.000445109	0.000325189	0.000425629	0.000215188	0.000354793	0.000249796	0.000280037	0.000910129	0.00101597	0.000566727	0.000554971	0.000864371	0.000570105
FBti0060035	INE-1{}1974	8.34776e-05	0	8.37494e-05	0	0	0	0	0	0	0.000167045	0	8.35472e-05	0	8.34061e-05	0	0.000166972	8.11554e-05	0	0.000166939	0	0
FBti0060036	INE-1{}1975	0	0	0	0	0	0	0	0	0	0	0	0	0	0	0	0	0	0	0	0	0
FBti0060037	INE-1{}1976	0	0	0	0	0	0	0	0	0	0	0	0	0	0	0	0	0	0	0	0	0
FBti0060038	INE-1{}1977	0	0	0	0	0	0	0	0	0	0	0	0	0	0	0	0	0	0	0	0	0
FBti0060039	INE-1{}1978	0	0	0	0	0	0	0	0	0	0	0	0	0	0	0	0	0	0	0	0	0
FBti0060040	INE-1{}1979	0	0	0	0	0	0	0	0	0	0	0	0	0	0	0	0	0	0	0	0	0
FBti0060041	INE-1{}1980	0	0	0	0	0	0	0	0	0	0	0	0	0	0	0	0	0	0.000140313	0	0	0
FBti0060042	INE-1{}1981	9.66444e-05	0.000193189	4.84796e-05	4.83403e-05	4.83537e-05	0.00029018	0.000144848	0	9.66641e-05	9.66966e-05	0	0.000145088	4.8292e-05	4.82808e-05	0	0.000144981	9.39559e-05	0.000242339	0.000144953	0.000144855	0
FBti0060043	INE-1{}1982	0	0	0	0	0	0	0	0	0	0	0	0	0	0	0	0	0	0	0	0	0
FBti0060045	INE-1{}1984	0	0	0	0	0	0	0	0	0	0	0	0	0	0	0	0	0	0	0	0	0
FBti0060047	INE-1{}1986	0	0	0	0	0	0	0	0	0	0	0	0	0	0	0	0	0	0	0	0	0
FBti0060048	INE-1{}1987	0	0	0	0	0	0	0.000703708	0	0.000234808	0	0	0	0	0	0	0	0	0	0	0	0
FBti0060049	invader1{}1988	0.00014729	0.00022082	0	0	7.3693e-05	0	0	0	7.36599e-05	0	0	0	7.35988e-05	0	0	0.000147305	7.15962e-05	0	7.36379e-05	0	0
FBti0060050	gypsy8{}1989	0.00592599	0.00569942	0.00594529	0.00671118	0.00660117	0.0068263	0.00424536	0.00648412	0.00514436	0.00525797	0.00850988	0.00581903	0.00860408	0.00491548	0.00849843	0.00816304	0.00728296	0.00751394	0.00592544	0.00715042	0.00726877
FBti0060051	rooA{}1990	0.00129335	0.00032317	0.00113537	0.00145557	0.00210307	0.00177987	0.000323074	0.000323292	0.000565957	0.000404391	0.000728557	0.000485412	0.000161568	0.000646122	0.000161684	0.00250612	0.00361495	0.00227019	0.00339473	0.00250394	0.00291046
FBti0060052	Cr1a{}1991	0	0	0	0	0	0	0	0	0	0	0	0	0	0	0	0	0	0	0	0	0
FBti0060053	Cr1a{}1992	0.000323054	0.00018835	5.40176e-05	0.000107725	0.000161632	0.000269441	2.68992e-05	0.000107669	0.000188486	0.000161614	0.000242639	0.000107774	2.69043e-05	0.000134491	5.38472e-05	0.000215391	7.85168e-05	2.70023e-05	2.69186e-05	0.000188303	0.000188475
FBti0060054	accord2{}1993	0	0	0	0	0	0	0	0	0	0	0	0	0	0	0	0	0	0	0	0	0
FBti0060055	accord2{}1994	0	0.000173979	0	0	0	0	0	0	0	0	0	0	0	0	0	0	0	0	0	0	0
FBti0060056	Cr1a{}1995	0.0194414	0.0176815	0.0186727	0.42764	0.416208	0.380162	0.440654	0.439651	0.398624	0.0357898	0.0378622	0.0467433	0.02632	0.0221916	0.0219823	0.0294619	0.0338697	0.0277508	0.0589737	0.0468679	0.0517384
FBti0060057	accord2{}1996	0.000217195	0.000359172	0.000249597	0.00100934	0.00103334	0.00120547	0.000718131	0.000645567	0.000653691	0.00199334	0.00316572	0.00119952	0.00230871	0.000783204	0.00196678	0.000207343	0.000209233	0.000156455	0.000353401	0.000181514	0.000231049
FBti0060058	Porto1{}1997	0.000211285	0.00042235	0	0.000211364	0	0.00042293	0.000422225	0.000211254	0	0	0	0	0	0	0.000211304	0.000211306	0.000205407	0	0	0.000633367	0.000633945
FBti0060059	flea{}1998	3.35556e-05	6.70764e-05	0.000117827	0.000117489	0.000570818	0.000201505	0.000117349	0.000167754	1.67812e-05	3.35737e-05	0.000100812	0	0	3.35269e-05	3.35587e-05	0.000201354	3.26222e-05	0.00010097	6.71049e-05	3.35298e-05	0.000134242
FBti0060060	INE-1{}1999	0	0	0.000148483	0	0	0	0	0	0	0	0	0	0	0	0	0	0.000143884	0	0	0	0
FBti0060061	INE-1{}2000	0.000614481	0.00149154	0.00149717	0.00122942	0.00122976	0.00105429	0.000789403	0.00122879	0.00096581	0.00131746	0.000967003	0.0014057	0.000965009	0.00175416	0.000877911	0.000263375	0.000256023	0.00149681	0.000614423	0.00166659	0.000438978
FBti0060062	INE-1{}2001	0.0216752	0.0194439	0.0238973	0.0169329	0.0186237	0.0210037	0.0208157	0.020217	0.0219094	0.018545	0.0200189	0.0225364	0.0226567	0.025789	0.0205282	0.0236689	0.0246463	0.0237379	0.0225921	0.0260973	0.0276532
FBti0060063	INE-1{}2002	0	0	0	0	0	0	0	0	0	0	0	0	0	0	0	0	0	0	0	0	0
FBti0060065	INE-1{}2004	0	0	0	0.00028913	0	0.000867804	0	0	0	0	0	0	0	0	0	0	0	0	0	0	0
FBti0060066	INE-1{}2005	0.000857816	0.000244963	0.000491777	0.000245182	0	0.00012265	0.00024489	0	0.00012257	0.000122611	0.000122721	0	0	0.00012244	0.000245113	0	0.000119136	0.000491658	0	0.000367353	0.000122563
FBti0060067	1360{}2006	0	0	0	0	0	0	0	0	0	0	0	0	0	0	0	0	0	0	0	0	0
FBti0060068	1360{}2007	0	0	0	0	0	0	0	0	0	0	0	0	0	0	0	0	0	0	0	0	0
FBti0060069	1360{}2008	0	0	0	0	0	0	0	0	0	0	0	0	0	0	0	0	0	0	0	0	0
FBti0060070	Porto1{}2009	0.000257128	0.000542543	0.000238856	0.000247697	0.000438355	0.000619539	6.66084e-05	0.000171394	0.000466734	0.000285852	0.00021935	0.000285936	3.80691e-05	5.70906e-05	3.80965e-05	0.00047621	0.000509208	0.000353422	0.000599908	0.000399669	0.000504804
FBti0060071	G7{}2010	0	0	0	0	0	0	0	0	0	0	0	0	0	0	0	0	0	0	0	0	0
FBti0060072	G7{}2011	0.000102806	5.13765e-05	0.000309423	0	5.14367e-05	0.000154341	0.000102723	0	0	0	0	0.000102892	0	0	0	2.57041e-05	0.000199893	0	0.000102797	5.13636e-05	0
FBti0060073	G5{}2012	0.000103268	0	0	0	0	6.89042e-05	0	6.88357e-05	6.88596e-05	0	0	0	0	0	0	6.88524e-05	6.69304e-05	0	0	0	6.88554e-05
FBti0060074	G7{}2013	7.87565e-05	3.93578e-05	7.90129e-05	0	7.88079e-05	7.88236e-05	0	0	3.93863e-05	0	0	0	0	3.93445e-05	0	0	0	0	0	0	0
FBti0060075	gypsy9{}2014	0.000109869	0.00014756	7.23363e-05	6.86938e-06	5.15347e-05	0.00020618	2.74449e-05	3.43291e-06	3.4341e-05	1.03058e-05	3.43835e-06	1.03088e-05	4.46063e-05	6.86093e-06	6.86744e-06	2.40362e-05	5.34063e-05	2.41063e-05	2.74647e-05	2.05846e-05	2.06034e-05
FBti0060076	INE-1{}2015	0.000738223	0.00129122	0.0012961	0	0.000369353	0.00055414	0	0.000184529	0.000369187	0	0.000184821	0	0.00018444	0	0.000553718	0.000184574	0.000179422	0.000370225	0.000184538	0.000553242	0
FBti0060077	F{}2016	0.000540564	0.00109359	0.000784083	0.000586373	0.000971043	0.00147315	0.000566153	0.000384201	0.000729583	0.000443111	0.000508731	0.000365022	0.000344963	0.000214739	0.000195402	0.000612266	0.000614169	0.000476869	0.000514464	0.000364437	0.000566696
FBti0060078	gypsy3{}2017	0.000171152	0	0.00017171	0.000342433	8.5632e-05	0.000428246	0.000427532	0.000342256	8.55936e-05	0	0	8.56476e-05	0.000171045	0.000342012	0	0	0	0	0.000171136	0.000171021	0
FBti0060079	accord{}2018	0	4.86811e-05	0.00019546	0	4.87381e-05	4.87478e-05	0	0	0	0	0	0	0	0	0	0	0	0	0	0	0
FBti0060080	gypsy5{}2019	1.33783e-05	0.000280798	0.000134218	5.35332e-05	8.03221e-05	0.00042847	0.000106939	0	6.6905e-05	6.69276e-05	0	2.67789e-05	2.67398e-05	6.68342e-05	2.6759e-05	9.36574e-05	0	6.70931e-05	0.000107016	5.3472e-05	1.33802e-05
FBti0060081	gypsy5{}2020	0.000222002	0	0	0	0	0	0	0	0.000222047	0	0	0	0	0	0	0.000222024	0	0	0	0	0
FBti0060082	INE-1{}2021	0.00261849	0.0020937	0.000788103	0.00104779	0.00209616	0.00131036	0.000784905	0.00157087	0.00209521	0.00078597	0.00288448	0.000786201	0.00130842	0.000261624	0.00157123	0.0031425	0.00178195	0.00183847	0.00235641	0.00130824	0.00104754
FBti0060083	FB{}2022	0	0	0	0	0	0	0	0	0	0	0	0	0	0.000185515	0	0	0	0	0	0	0
FBti0060084	copia{}2023	0	0	0	0	0	0	0	0	0	0	0	0	0	0	0	0	0	0	0	0	0
FBti0060087	Quasimodo{}2026	0	0	0	0	3.13459e-05	0	0	6.26419e-05	0	0	0	0	0	0	0	0	0	0	0	6.26027e-05	0
FBti0060088	G5A{}2027	0.00127823	0.00247271	0.00202701	0.00354738	0.00297073	0.00334274	0.00255438	0.002721	0.0031756	0.00177399	0.00144524	0.00115549	0.00140105	0.00156552	0.00144329	0.00103093	0.000721551	0.0016543	0.00160794	0.00111244	0.000866021
FBti0060089	INE-1{}2028	0	0.000172025	0.000172674	0	0	0.000172261	0	0	0	0	0	0	0	0	0	0	0	0	0	0	0
FBti0060090	INE-1{}2029	0	0.000266264	0	0.000266502	0	0	0	0.000266364	0.000532913	0	0	0	0	0	0	0	0	0	0	0.000266198	0
FBti0060093	jockey{}2032	0.000410307	0.000546793	0.000274429	0.00013682	0	0.000273771	0	0.000683747	0.000547188	0.000410529	0.000136966	0.000547533	0.000546734	0.000273304	0.000410345	0.00109426	0.000265929	0	0.000820537	0.000819983	0.000957521
FBti0060094	invader1{}2033	9.69502e-05	0.0001938	0	0	0	0	0	0	0	0	0	0	0	0	0	0	0.000188507	0	0	0	0
FBti0060095	invader1{}2034	0.000187953	9.39276e-05	0	0.000564069	0.000658263	0.000564338	0.000187799	0	0.000469977	0.000188054	0.000188223	0	0	0	0	0.000187971	0	0.000188519	0.000187935	0.000657328	9.39898e-05
FBti0060096	INE-1{}2035	0	0.000111347	0	0	0	0	0	0	0	0	0	0	0	0	0	0	0	0	0	0.000111319	0
FBti0060097	invader1{}2036	0.00475791	0.00811904	0.00617049	0.00835847	0.00812856	0.00743331	0.00649331	0.0103267	0.00928561	0.0119592	0.0123186	0.00998832	0.0075383	0.00510168	0.00429411	0.0131146	0.0143279	0.0171103	0.00974699	0.0111319	0.0186862
FBti0060098	INE-1{}2037	0	0	0	0	0	0	0	0	0	0	0	0	0	0	0	0	0	0	0	0	0
FBti0060099	INE-1{}2038	0	0	0	0	0	0	0	0	0	0	0	0	0	0	0	0	0	0	0	0	0
FBti0060101	INE-1{}2040	0	0	0	0	0	0	0	0	0	0	0	0	0	0	0	0	0	0	0	0	0
FBti0060102	INE-1{}2041	0	9.62905e-05	0	0	0	0	0	0	0	0	0	0	0	0	0	0.0001927	0	0	0	9.62664e-05	0
FBti0060103	1360{}2042	0	0.00012732	0	0.00019115	6.37344e-05	0	0.000254564	6.36837e-05	6.37058e-05	6.37273e-05	0.000191354	0	0.000127306	0	0	0.000127398	0.000247684	0	0.000127374	0	6.3702e-05
FBti0060105	INE-1{}2044	0.00010935	0.000236803	3.65688e-05	2.73478e-05	7.29477e-05	0.000501616	5.46305e-05	6.37785e-05	9.11437e-05	4.55872e-05	5.47538e-05	3.64805e-05	6.37477e-05	9.10471e-06	3.64534e-05	9.11343e-05	4.42951e-05	0.00017366	7.28932e-05	2.73165e-05	0
FBti0060106	gypsy9{}2045	0	0.000218717	0.000439086	0	0	0	0	0	0	0	0	0.00131408	0.000218694	0	0	0	0	0	0.00021881	0.000218662	0
FBti0060109	Stalker{}2048	0.000444004	0.000665661	0.000779537	0.000555213	0.000888588	0.00205527	0.000776374	0.00066591	0.000666141	0.000555305	0.000666964	0.000777655	0.000443726	0	0.000333033	0.00111012	0.00107913	0.000723682	0.000887924	0.000166373	0.00111017
FBti0060111	Stalker4{}2050	0	0	0	0	0	0	0	0	0	0	0	0	0	0	0	0.000198957	0	0	0.000198918	0	0.000198965
FBti0060112	INE-1{}2051	0	0	0	0	0	0	9.50662e-05	0	0	0	0	0	0	0	0	0	0	0	0	0	0
FBti0060113	Stalker4{}2052	0.000600711	0	0	0	0	0	0	0	0	0	0	0	0	0	0	0	0	0	0	0	0
FBti0060114	INE-1{}2053	0	0	0	0	0	0	0	0	0	0	0	0	0	0	0	0	0	0	0	0	0
FBti0060117	INE-1{}2056	0	0	0	0	0	0	0	0	0	0	0	0	0	0	0	0	0	0	0	0	0
FBti0060119	INE-1{}2058	0.000414004	0	0	0	0	0	0	0	0	0	0	0	0	0.000206825	0	0	0	0	0	0	0
FBti0060120	INE-1{}2059	0	0	0.000108225	0	0.000107945	0	0	0	0	0.000107932	0	0	0	0	0	0.000107885	0	0	0	0	0
FBti0060121	17.6{}2060	0	0	0	0	0	0	0	0	0	0	0	0	0.000178006	0	0	0	0	0	0.000356202	0	0.000356287
FBti0060122	INE-1{}2061	0	0	0	0	0	0	0	0	0	0	0	0	0	0	0	0	0	0	0	0	0
FBti0060123	INE-1{}2062	0	8.23129e-05	0	0	0	0	0	0	0	0	0	0	0	0	0	0	0	0	0	0	0
FBti0060124	INE-1{}2063	0	0	0	0	0	0	0	0	0	0	0	0	0	0	0	0	0	0	0	0	0
FBti0060125	INE-1{}2064	0	0	0	0	0	0	0	0	0	0	0	0	0	0	0	0	0	0	0	0	0
FBti0060126	R1A1{}2065	0.000666006	0.00033283	0.00133635	0.000666255	0.00033322	0.00199972	0.000665463	0.00199773	0.00133228	0.00266546	0.00133393	0.00333281	0.00133118	0.000332718	0.000666067	0.000999109	0.00420861	0.00300606	0.00133189	0.00199648	0.00266441
FBti0060127	INE-1{}2066	0	0	0	0	0	0	0	0	0	0	0	0.000136578	0	0	0.000136477	0	0	0	0	0	0.000272968
FBti0060128	INE-1{}2067	0.000390893	0.000879054	0.000686291	0.00014664	0.000977871	0.000391227	0.000683506	0.00073282	0.000977432	0.000635545	0.00097864	0.000635732	0.000390649	0.000195279	0.000244331	0.000635265	0.000427522	0.00132324	0.000537428	0.00190414	0.00190588
FBti0060129	INE-1{}2068	0.00345893	0.0044449	0.0034702	0.00469602	0.00716961	0.00272005	0.00345612	0.00469359	0.00370675	0.0039552	0.00470102	0.00469818	0.00716045	0.00666509	0.00370634	0.00370637	0.00312252	0.00545186	0.00222339	0.00543129	0.00469494
FBti0060130	INE-1{}2069	0.000239346	0.000119611	0.000720376	0.000119718	0	0	0	0.000478623	0.000119697	0.000239475	0.000119845	0.000359318	0	0.000597853	0.000718103	0.000119685	0	0.000600169	0.000358985	0	0.00023938
FBti0060131	diver2{}2070	0	0	0	0	0	0	0	0	0	0	0.000249434	0	0	0	0	0	0	0	0	0.000248884	0
FBti0060132	INE-1{}2071	0.000109611	0.000766879	0.000329904	0.000438608	0.00043873	0.000274261	0.000328565	0.000547976	0.00016445	0.000164505	0.000329306	0.000274256	0.000328627	0.000109517	0.000712537	0.000931787	0.000905776	0.000659649	0.000438403	5.47634e-05	0.000274067
FBti0060133	Stalker4{}2072	0	0	0	0	0	0.000249288	0	0.00012452	0	0	0	0	0	0	0	0	0	0	0	0	0
FBti0060134	INE-1{}2073	0	0	0	0	0	0	0	0	0	0	0	0	0	0	0	0	0	0	0	0	0
FBti0060135	INE-1{}2074	0	0	0.000225172	0	0	0	0	0	0	0	0	0	0	0	0	0	0	0	0	0	0
FBti0060136	Idefix{}2075	0	0	0	0	0	0.000741832	0	0	0	0	0	0.000247273	0	0	0	0	0	0.000247812	0	0	0
FBti0060137	INE-1{}2076	0	0	0	0	0	0	0	0	0	0	0	0	0	0	0	0	0	0	0	0	0
FBti0060138	INE-1{}2077	0.00163196	0.000593131	0.000893057	0.000222623	0.0010392	0.000445458	0.000592955	0.000593354	0.000593559	0.000519539	0.0011143	0.000890901	0.000667201	0.00081528	0.000741866	0.000593498	0.000937512	0.000446421	0.00051921	0.000667105	0.00126124
FBti0060139	INE-1{}2078	0	7.85138e-05	0	0	0	0	0	0	0	0	0	0	0	0	0	0.000157125	0.000229108	0	0	0.000313977	0
FBti0060140	INE-1{}2079	0.000271117	0	0	0	0	0	0	0	0	0	0	0	0	0	0	0	0	0.000271935	0	0	0
FBti0060141	INE-1{}2080	0.000870349	0.000173979	0	0.00069654	0	0	0	0.00104427	0.000174105	0	0.000871601	0	0.000347922	0.000347841	0	0.000522261	0.000507682	0	0.00052216	0.000347872	0
FBti0060142	INE-1{}2081	0	0.000760755	0	0.000190359	0.000380823	0	0	0	0	0	0.000190561	0	0	0	0.000190305	0	0	0	0	0	0
FBti0060143	INE-1{}2082	0	0.00039638	0.000198939	0	0.000595267	0.000595386	0	0.000594794	0	0.0001984	0.000893603	9.92292e-05	9.90845e-05	0.000198123	0.000198311	0.000396626	0	0.000596673	0.000198274	0.000198141	0.000198321
FBti0060144	INE-1{}2083	0.000271302	0.000458889	0.000104687	0.00014614	0.000125298	0.000438631	6.25572e-05	4.17328e-05	0.000125242	0.00031321	0.000501586	0.000543057	0.000145994	0.000125109	0.00016697	0.000166972	0.000202889	4.18646e-05	0.000166939	0.00025024	0.000229596
FBti0060145	1360{}2084	0	0	0	0	0	0	0	0	0	0	0	0	0	0	0	0	0	0	0	0	0
FBti0060147	INE-1{}2086	0	0	0.000222725	0.00466379	0.0108852	0.00699902	0.00454733	0.00721403	0.00466299	0.0143269	0.0173411	0.0105539	0.0109822	0.00809614	0.00566157	0.0127664	0.00884888	0.0093522	0.00843528	0.0150845	0.0143212
FBti0060148	INE-1{}2087	0.0194516	0.0157962	0.0189051	0.0143509	0.0214107	0.017278	0.0100823	0.0172608	0.0144701	0.0144749	0.0152184	0.00717876	0.018589	0.0165197	0.0133742	0.0164139	0.0228108	0.0223148	0.0104543	0.017493	0.0175089
FBti0060149	Tc3{}2088	0	0	0.000156817	0	0.000312819	0.000156441	0	0	0	0	0	0	0	0	0	0	0	0	0	0	0
FBti0060150	INE-1{}2089	0.00541866	0.00624906	0.00878172	0.00604615	0.00959312	0.0050061	0.00478952	0.00541788	0.00729583	0.00688125	0.00855711	0.00396309	0.00687323	0.00874573	0.00583602	0.0087541	0.0109411	0.00940673	0.00479298	0.00541449	0.00500256
FBti0060151	INE-1{}2090	0.000225267	0.0013509	0.000452001	0	0.000225414	0.00112729	0	0	0.000225313	0	0.000902364	0.000450909	0.000900503	0.000450148	0.00270345	0.000450578	0.001095	0.00135568	0.000225245	0	0.000675897
FBti0060152	INE-1{}2091	0.00174847	0.000531868	0.00114402	0.00136888	0.00144533	0.00152171	0.000227876	0.00212827	0.000988468	0.000304246	0.00045678	0	0.00113959	0.00083551	0.00205274	0.000684253	0.00162593	0.000533748	0.000760134	0.00129136	0.000760314
FBti0060153	INE-1{}2092	0.00208068	0.00179276	0.00352709	0.00236856	0.00165127	0.00258512	0.0013621	0.00236733	0.000789385	0.00236895	0.00237108	0.00157977	0.0024379	0.00193553	0.00200912	0.00165036	0.00209256	0.00122339	0.00186526	0.00164893	0.00200922
FBti0060155	gypsy8{}2094	6.50452e-05	0.000520092	0.000522056	0.000130139	0.000195263	0.000585906	0.000259969	0	0.000260234	0	0	0	0	0	0	0.000260207	0	0	0.000130078	0.00012999	0
FBti0060156	gypsy8{}2095	0	0	0	0	0	0	0	0	0	0	0	0	0	0	0	0	0	0	0	0	0
FBti0060157	INE-1{}2096	0	0	0	0	0	0	0	0	0	0	0	0	0	0	0	0	0	0	0	0	0
FBti0060159	ninja-Dsim-like{}2098	0	0	0	0	0	0	0	0	0	0	0	0	0	0	0	0	0	0	0	0	0
FBti0060160	gypsy3{}2099	0.000104561	0.000104506	0.000209802	0	0	0.00136045	0.000417902	0	0.000313746	0	0	0.000209296	0	0	0	0	0.000304956	0	0	0	0.000104576
FBti0060161	1731{}2100	0	0	0	0	0	0	0	0	0	0	0	0	0	0	0	0	0	0	0	0	0
FBti0060162	ZAM{}2101	0.000238415	0.000238291	0.000478382	0	0	0.00274411	0.000476441	0.00023838	0.000357695	0	0.000238758	0	0.000119133	0.000238211	0	0	0.000463565	0	0	0	0.000476897
FBti0060163	Stalker3{}2102	0	0	0	0	0	0	0	0	0	0	0	0	0	0	0	0	0	0	0	0	0
FBti0060165	INE-1{}2104	0	0	0	0	0	0	0	0	0	0	0	0	0	0	0	0	0	0	0	0	0
FBti0060166	INE-1{}2105	0.000514031	0.000513765	0.000206282	0.000102845	0	0.000308682	0.000616335	0.000308375	0	0.000411447	0.000411817	0.000205784	0.000410968	0.000719028	0	0.000205633	0.000299839	0.000206233	0	0	0
FBti0060167	INE-1{}2106	0	0.000160316	0	0	0	0	0	0	0	0	0	0	0	0	0	0	0	0	0	0	0
FBti0060168	INE-1{}2107	0	0	0	0	0	0	0	0	0	0	0	0	0	0	0	0	0	0	0	0	0
FBti0060169	INE-1{}2108	0	0	0	0	0	0	0	0	0	0	0	0	0	0	0	0	0	0	0	0	0
FBti0060173	I{}2112	0.000621006	0.000827578	0.00103838	0.0010354	0.00103568	0.000414357	0.000620499	0.000206972	0.000828176	0.000621341	0.0002073	0	0.000413745	0.000413649	0.000414042	0.000414045	0.000201243	0.000830504	0.000413965	0.000206843	0.000414063
FBti0060174	jockey{}2113	0	6.00989e-05	6.03259e-05	0	0	6.01813e-05	0	0	6.01423e-05	0	6.02166e-05	0	0	0	0	0.000120272	0	0.000180934	0	6.00838e-05	0
FBti0060175	jockey{}2114	0	0.000156226	0.00047045	0	0	0.000156441	0	0	0.000312679	0	0	0	0	0	0	0	0	0.000313558	0	0.000312375	0
FBti0060176	INE-1{}2115	0.000348139	0.000695918	0.00104782	0.000174135	0.000870917	0.00104531	0	0.000696179	0.000174105	0.000522491	0.000871601	0.000174215	0.000347922	0.00156529	0.000522257	0.000522261	0.00067691	0.000523784	0.000174053	0.000695744	0.000174095
FBti0060177	INE-1{}2116	0	0	0	0	0	0	0	0	0	0	0	0	0	0	0	0	0	0	0	0	0
FBti0060178	INE-1{}2117	0	0	0	0	0	0	0	0	0	0	0	0	0	0	0	0	0	0	0	0	0
FBti0060179	gypsy{}2118	0.00648524	0.00784307	0.0072611	0.00892703	0.0078912	0.00833415	0.00312334	0.0044223	0.00467032	0.00394516	0.00528658	0.00399824	0.00425166	0.00288994	0.00307429	0.029394	0.019608	0.0247703	0.0195706	0.0224217	0.0247123
FBti0060180	F{}2119	0.000914516	0.00198938	0.0012683	0.000287014	0.00106763	0.00209082	0.000438968	0.000770952	0.000753284	0.000340886	0.000538725	0.00024228	0.000349449	0.000421034	0.000170367	0.000672505	0.000557851	0.000692451	0.00032274	0.000286686	0.000331784
FBti0060181	mdg1{}2120	0	0.000637925	0.000512267	0.000255398	0.000510938	0.00025552	0.000127547	0.000255266	0.000255354	0	0	0.000383273	0	0.000510168	0	0.000765983	0.0002482	0	0.000638196	0	0.000255339
FBti0060182	mdg1{}2121	6.96279e-05	0.000556734	0.000279419	0.000626886	0.000557387	0.000836247	0.00146099	0.00111389	0.000974989	0.000278662	6.97281e-05	0	0.00125252	0.00041741	0.000208903	0.000626714	0.000406146	0.000488865	0.000696213	0.000208723	0.000696379
FBti0060184	INE-1{}2123	0	0	0	0	0	0	0	0	0	0	0	0	0	0	0	0	0	0	0	0	0
FBti0060186	INE-1{}2125	0	0	0	0	0	0	0	0	0	0	0	0	0	0	0	0	0	0	0	0	0
FBti0060187	G2{}2126	0	0	0	0	0	0	0	0	0	0	0	0	0	0	0	0	0	0	0	0	0
FBti0060188	INE-1{}2127	0	0	0	0	0	0	0	0	0	0	0	0	0	0	0	0	0	0	0	0	0
FBti0060189	INE-1{}2128	0	0.00018824	6.29837e-05	6.28027e-05	0.00012564	6.28328e-05	0	0	6.2792e-05	0.000125626	0	6.28316e-05	6.274e-05	0	0	0.000188357	0	6.29685e-05	0	0	6.27882e-05
FBti0060190	1360{}2129	0	0	0	0	0	0	0	0	0	0	0	0	0	0	0	0	0	0	0	0	0
FBti0060191	INE-1{}2130	0.000200894	0	0	0	0	0	0	0	0	0	0	0	0	0	0	0	0.000195305	0	0	0	0
FBti0060192	INE-1{}2131	0	7.6551e-05	0	0	0	0	0	0	0	0	0	0	0	0	0	0	7.44601e-05	0	0	0	0
FBti0060193	INE-1{}2132	0	0	0	0	0	0	0	0	0	0	0	0	0	0	0	0	0	0	0	0	0
FBti0060194	INE-1{}2133	0	0.000157028	0	0	0	0	0	7.85433e-05	0	0	7.86676e-05	0	0	0	0	0	0	7.87914e-05	0	0	0
FBti0060195	INE-1{}2134	8.62386e-05	0.000150839	8.65195e-05	0.00028038	0.000258885	0.000237358	0.000129253	0.000194009	8.62562e-05	0.00017257	0.000215907	2.15776e-05	0.000172369	0.000193871	4.31233e-05	0.000215618	0.000209599	0.000259496	0.000107788	0.000129258	0.000323441
FBti0060196	INE-1{}2135	0	0	0	0	0	0	0	0	0	0	0	0	0	0	0	0	0	0	0	0	0
FBti0060197	mdg1{}2136	0	0.000356051	0.000357396	0	0.000356468	0	0	0.000356185	0	0	0	0	0	0.000355931	0	0.000356271	0	0	0	0.000355962	0
FBti0060198	mdg1{}2137	0.000477071	0.000601213	0.000624293	0.00097525	0.000705696	0.00134939	0.00097409	0.00111992	0.000539408	0.000518836	0.000373897	0.000394431	0.000704795	0.000891152	0.000477115	0.00211592	0.0018552	0.00126909	0.000891832	0.00128503	0.000643101
FBti0060199	mdg1{}2138	0.00132526	0.00156722	0.00149927	0.00173185	0.00161883	0.00164903	0.00185903	0.00189012	0.00179922	0.000881996	0.000902715	0.000780686	0.00128466	0.00139372	0.0012219	0.00318812	0.00259807	0.00234317	0.0016793	0.00208976	0.00168766
FBti0060200	mdg1{}2139	0.000974988	0.00126033	0.00137812	0.00134382	0.00134853	0.00140518	0.00140284	0.00152943	0.00152996	0.000676357	0.000663946	0.000498743	0.00117358	0.00120795	0.00121343	0.00232287	0.00189152	0.001669	0.000987894	0.00125568	0.00118315
FBti0060201	springer{}2140	0.00136833	0.00238974	0.00176295	0.00476935	0.00507335	0.00605463	0.00225951	0.0030243	0.00213215	0.000576452	0.000432727	0.000331557	0.00109398	0.000532474	0.00154132	0.00152693	0.00112023	0.00174808	0.00211712	0.00230279	0.002593
FBti0060202	springer{}2141	0.000614412	0.000529806	0.000692961	0.000654815	0.000675089	0.00124193	0.00736292	0.00791795	0.00770782	0.0107962	0.0115861	0.0105462	0.00302198	0.00270832	0.00257434	0.00504029	0.00490349	0.00434608	0.00479437	0.00530075	0.00517706
FBti0060203	Doc{}2142	0.00358686	0.00351287	0.00365647	0.00419466	0.00364698	0.00451449	0.00480983	0.0050079	0.00420116	0.00501132	0.00527601	0.00530894	0.00418326	0.00354774	0.00435227	0.00358	0.00391507	0.00331536	0.0040195	0.00365622	0.0039988
FBti0060204	G4{}2143	0	0	0	0	0	9.89109e-05	0	0	0	0	0	0	0	0	0	0	0	0	0	0	0
FBti0060206	INE-1{}2145	0.00892917	0.0105402	0.00779985	0.00931753	0.00854986	0.00701075	0.00738363	0.00638806	0.00600532	0.00816382	0.00955871	0.00962997	0.00761581	0.00661423	0.00615861	0.00846816	0.0080821	0.00972816	0.00977497	0.00823005	0.0110861
FBti0060208	INE-1{}2147	0	7.61701e-05	7.64578e-05	0.000152476	7.62594e-05	0	0	0	0.00015245	0	0	0	0	0	0	0	0	0	0	0	0
FBti0060209	INE-1{}2148	0	0	0	0	0	0	0	0	0	0	0	0	0	0	0	0	0	0	0	0	0
FBti0060210	INE-1{}2149	0	0	0	0	0.000239502	0	0	0	0	0.000119738	0.00023969	0	0	0	0	0	0	0	0	0	0
FBti0060211	INE-1{}2150	0.000251117	0.000250987	0.00125967	0.000753633	0.00175897	0.000753993	0.000250912	0	0.00125584	0.00150752	0.000502957	0.00100531	0.00050192	0.00150541	0.00075342	0.000753426	0.00219718	0.00125937	0.00075328	0.000752772	0.000502306
FBti0060212	INE-1{}2151	0.000236756	0.000520594	0.000380044	0.000142107	0.000142147	0.00028435	0.000331189	9.4689e-05	0.000142083	4.73769e-05	9.48388e-05	0.000142172	0.000141965	0.000283864	4.73556e-05	0.000142068	0.000184136	0	9.46936e-05	0.000189259	0
FBti0060213	INE-1{}2152	0	0.000327491	0	0	0	0.00016397	0.000163697	0	0.000163864	0	0	0	0	0	0	0.000163847	0	0	0	0	0
FBti0060215	INE-1{}2154	0	0	0	0	0	0	0.000102379	0	0	0	0	0	0	0	0	0	0	0	0	0	0
FBti0060216	INE-1{}2155	0	0	0	0	0	0	0	0	0	0	0	0	0	0	0	0	0	0	0	0	0
FBti0060217	F{}2156	0.00117435	0.00221849	0.00160542	0.00051639	0.00120094	0.00222154	0.000502882	0.000825796	0.00130366	0.000439004	0.000310164	0.000258314	0.000412699	0.000283665	0.000283934	0.000787279	0.000664934	0.00077663	0.000477437	0.00067054	0.000567898
FBti0060218	H{}2157	0.00026127	0.000309492	0.000320369	0.000174245	0.000397002	0.000397081	6.76813e-05	0.000145129	0.000164537	0.000174274	0.000222883	7.74778e-05	0.000309459	0.000125689	0.000135486	0.000251618	0.000310446	0.000427056	0.000319299	0.000193384	0.000280663
FBti0060220	Quasimodo{}2159	0.000142494	0.000284841	0.000142958	0.00128293	0.000427762	0.000427847	0.000284756	0.000569895	0.000142523	0.000285143	0.000142699	0.000570453	0.000996836	0.000427117	0.000142507	0.000855051	0.000692652	0.000142924	0.000142481	0.000854308	0.000570059
FBti0060221	1360{}2160	0	0	0	8.15099e-05	0	8.15489e-05	0	0	8.1496e-05	0	0	0	0	0	0	0	0	0	0	0	0
FBti0060222	INE-1{}2161	0	0	0	0	0	0	0	0	0	0	0	0	0	0	0	0	0	0	0	0	0
FBti0060223	INE-1{}2162	0	0	0	0	0	0	0	0	0	0	0	0	0	0	0	0	0	0	0	0	0
FBti0060224	INE-1{}2163	0	0	0	0	0	0	0	0	0	0	0	0	0	0	0	0	0	0	0	0	0
FBti0060225	INE-1{}2164	0	0.000415192	0.00020838	0	0	0.00010394	0	0	0	0	0	0	0	0	0	0	0	0	0	0.000103772	0.000103867
FBti0060226	INE-1{}2165	0	0	0	0	0	0	0	0	0	0	0	0	0	0	0	0	0	0	0	0	0
FBti0060227	INE-1{}2166	0	0	0	0	0	0	0	0	0	0	0	0	0	0	0	0	0	0	0	0	0
FBti0060228	INE-1{}2167	0	0	0.000370314	0	0	0.000184713	0	0	0	0	0	0	0	0	0	0	0	0	0	0	0
FBti0060230	INE-1{}2169	0	0	0	0	0	0.00018986	0	0	0	0	0	0	0	0	0	0	0	0	0	0	0
FBti0060231	INE-1{}2170	0	0	0	0	0	0	0	0	0	0	0	0	0	0	0	0	0	0	0	0	0
FBti0060232	INE-1{}2171	0	0	0	0	0	0	0	0	0	0	0	0	0	0	0	0	0	0	0	0	0
FBti0060234	INE-1{}2173	0	0	0	0	0	0	0	0	0	0	0	0	0	0	0	0	0	0	0	0	0
FBti0060235	HeT-A{}2174	0	0	0	0	0	9.09863e-05	0	9.08958e-05	0	0	0	0	9.08519e-05	0	0	0	0	0	0	0	0
FBti0060238	1360{}2177	0	0	0	0	0	0	0	0	0	0	0	0	0	0	0	0	0	0	0	0	0
FBti0060239	hopper2{}2178	0	0	9.31395e-05	0	0	0	0	0	0	0	0.000185942	0	4.63896e-05	0	9.28457e-05	9.28465e-05	0	0	0	0	0
FBti0060240	INE-1{}2179	0	0	0	0	0	0	0	0	0	0	0	0	0	0	0	0	0	0	0	0	0
FBti0060241	HB{}2180	0	0.00153102	0.00215152	0.000306477	0.000306563	0.000306624	0.000612226	0.00183791	0.00061285	0.000613057	0.00153402	0	0.000918513	0.000306101	0.000919172	0	0.000595681	0.000307286	0	0	0
FBti0060242	INE-1{}2181	0	0	0	0	0	0	0	0	0	0	0	0	0	0	0	0	0	0	0	0	0
FBti0060243	INE-1{}2182	0	0	0	0	0	0	0	0	0	0	0	0	0	0	0	0	0	0	0	0	0
FBti0060244	H{}2183	0	0	0	0	0	0	0	0	0	0	0	0	0	0	0	0	0	0	0	0	0
FBti0060245	INE-1{}2184	0	0	0	0	0	0	0	0	0	0	0	0	0	0	0	0	0	0	0	0	0
FBti0060249	INE-1{}2188	0	0	0	0	0	0	0	0	0	0	0	0	0	0	0	0	0	0	0	0	0
FBti0060250	1360{}2189	6.2715e-05	6.26825e-05	4.71894e-05	6.27385e-05	0	3.13842e-05	0	4.70295e-05	4.70458e-05	0.000172559	0	0	1.56689e-05	7.83266e-05	3.13604e-05	3.13606e-05	9.14556e-05	1.5726e-05	3.13545e-05	0.000156667	0
FBti0060251	1360{}2190	0	0	2.17062e-05	0	0	4.33085e-05	0.000129709	0	6.49206e-05	4.3295e-05	4.33338e-05	0	0	0	0	0	4.20678e-05	0	2.16337e-05	0	0
FBti0060252	H{}2191	9.85954e-05	0.000340426	0.00026078	0.000224164	0.000179381	0.000358834	0.000304501	0.000241972	0.000188266	7.17445e-05	3.59045e-05	0.00013456	3.58304e-05	6.26888e-05	3.58562e-05	4.48206e-05	6.9711e-05	4.49512e-05	8.96237e-05	5.37379e-05	8.06805e-05
FBti0060253	invader1{}2192	0.00147408	0.00197494	0.0015317	0.0125203	0.0135879	0.0131691	0.0169381	0.0189287	0.0191564	0.00190329	0.00226351	0.00162986	0.000845311	0.000764462	0.000607236	0.00202531	0.00175381	0.00191504	0.00432356	0.00332465	0.00355585
FBti0060254	invader1{}2193	0.000255339	0.000721619	0.000503507	0.000317091	0.000528632	0.00105748	0.000228738	0.000325731	0.000299424	0.000215834	0.00027775	0.000185055	0.000233181	0.000175945	6.16392e-05	0.000396255	0.000286755	0.00026494	0.000281727	0.000409108	0.000361048
FBti0060255	H{}2194	0	0.000179067	0.000179743	0.000179227	0	0.000179312	0.000179013	0.000716535	0	0.000179256	0	0	0.00071619	0.000895031	0	0.000358355	0	0.000359399	0	0.000179022	0.000179185
FBti0060256	Dm88{}2195	6.62884e-05	6.6254e-05	5.54202e-05	0.000132626	0.000110553	0.000165862	8.83125e-05	8.83718e-05	0.000154704	2.21081e-05	0	0	2.20823e-05	0	0	2.20983e-05	4.29629e-05	7.75696e-05	2.2094e-05	8.83165e-05	0
FBti0060257	INE-1{}2196	0	0	0	0	0	0	0	0	0	0	0	0	0	0	0	0	0	0	0	0	0
FBti0060258	Dm88{}2197	8.92665e-05	0.000285505	0.000232849	0.00010716	7.14598e-05	7.14741e-05	7.1355e-05	0	0.000196426	0.000142904	0.000339701	1.78682e-05	0.000124895	0	7.14198e-05	8.92755e-05	0.00020828	7.16285e-05	0.000142813	0.000124877	0.00021427
FBti0060260	Dm88{}2199	0.0004349	0.000386377	0.000193918	0.000265872	0.000435184	0.000338544	0.000241414	0.000289892	0.000193328	9.66966e-05	0.000145175	0.000265994	4.8292e-05	9.65617e-05	2.41633e-05	0.000193308	9.39559e-05	9.69358e-05	0.000144953	9.65701e-05	7.24937e-05
FBti0060261	Dm88{}2200	0.000144967	0.00033808	0.000193918	0.000193361	9.67075e-05	0.000217635	0.000193131	0.00041068	0.000338324	4.83483e-05	9.67835e-05	0.000338538	0.000144876	0	0.00014498	0	0.000211401	4.84679e-05	9.66353e-05	0	9.66582e-05
FBti0060262	jockey{}2201	0	8.45867e-05	0	0	0	0.000508216	0	0	0	0	0	0	0	0	0	0	0	0	0	0	0
FBti0060263	Dm88{}2202	0.000201997	0.000874868	0.000472862	0.000740934	0.000774829	0.000707594	0.000773692	0.000134646	0.000303058	0.000168422	0.000606864	0.000269555	0.000269161	0	0.000202016	0.000740731	0.000654594	0.000405213	0.000336631	0.000538246	0.000538737
FBti0060264	INE-1{}2203	0	0	0	0	0	0	0	0	0	0	0	0	0	0	0	0	0	0	0	0	0
FBti0060266	INE-1{}2205	0	0	0	0	0	0	0	0	0	0	0	0	0	0	0	0	0	0	0	0	0
FBti0060267	Max{}2206	0.000738381	0.00105148	0.000907954	0.00177147	0.00168042	0.00194562	0.00411655	0.00387431	0.00350639	0.00164754	0.00161303	0.00109542	0.000682412	0.0005223	0.00056854	0.00149978	0.00126734	0.00126821	0.00147989	0.00130913	0.00132993
FBti0060268	INE-1{}2207	6.96279e-05	0	0	0	0	0.000139375	0	0	6.96421e-05	0	6.97281e-05	0	6.95843e-05	0	6.96343e-05	0	0	0	0	0	0
FBti0060269	INE-1{}2208	0	0	0	0	0	0	0	0	0	0	0	0	0	0	0	0	0	0	0	0	0
FBti0060270	INE-1{}2209	0	0	0	0	0	0	0	0	0	0	0	0	0	0	8.85523e-05	0	0	0	0	0	0
FBti0060271	INE-1{}2210	0	0	0	0	0	0	0	0	0	0	0	0	0	0	0	0	0	0	0	0	0
FBti0060272	1360{}2211	0	0	0	0	0	0	0	0	0	0	0	0	0	0	0	0	0	0	0	0	0.00021427
FBti0060273	INE-1{}2212	0	0	0	0	0	0.000168475	8.4097e-05	0	0	0	0	0	0	0.000168187	0	0	0	0	0	0	0
FBti0060274	gypsy12{}2213	0.000339272	0.000508644	0.000306339	0.00179882	0.00251225	0.00271649	0.00183058	0.00118728	0.0014931	0.000373401	0.000917353	0.000407466	0.000203436	0.000101695	0.000135721	0.00268052	0.000164917	0.000340295	0.00016962	0.000542418	0.000407185
FBti0060275	gypsy12{}2214	0.000318585	0.00045926	0.000408748	0.000517895	0.000606933	0.00145325	0.000599922	0.000597262	0.00111834	0.00106968	0.00100008	0.000797128	0.000324509	0.000339738	0.000220579	0.00045648	0.00034546	0.000334909	0.000986296	0.000670351	0.000726111
FBti0060276	Tc3{}2215	0.000271117	0.000406465	0.000272	0.000949266	0.000678236	0.000271349	0.000270897	0.000813236	0	0.000135632	0.000135754	0.000678359	0.00067737	0.000270885	0.00108457	0.000271145	0.00171324	0.000271935	0.000406638	0.000948181	0.000135578
FBti0060277	HMS-Beagle2{}2216	0	0	0	0.00145942	0.00127734	0.00200766	0.00127547	0.000364665	0.00218875	0	9.13106e-05	0	0	0	0.000182375	0	0	0	0.000364683	0.000364437	9.11924e-05
FBti0060278	INE-1{}2217	0	0.000149368	0.000299864	0	0	0	0	0	0	0	0	0	0	0.000298635	0	0	0	0	0.000448293	0.00014933	0.000298933
FBti0060279	1731{}2218	0	0	0	0	0	0	0	0	0	0	0	0	0	0	0	0	0	0	0	0	0
FBti0060280	1731{}2219	0.0425072	0.0372412	0.0452047	0.0165239	0.020321	0.0224756	0.0395747	0.0368597	0.0330356	0.0301648	0.0318949	0.0373114	0.0305183	0.0268892	0.0168093	0.0165194	0.0206207	0.0185377	0.0371977	0.0336753	0.0311351
FBti0060281	INE-1{}2220	0	0.000151212	0	0	0	0.000151419	0	0	0	0	0	0	0	0	0	0	0	0	0	0	0
FBti0060282	FB{}2221	0	0	0	0	0	0	0	0	0	0	0	0	0	0	0	0	0	0	0	0	0
FBti0060283	INE-1{}2222	0.000269923	0	0	0	0.000270099	0.000135077	0	0	0.000404967	0	0	0	0	0	0	0	0	0	0	0	0
FBti0060284	INE-1{}2223	0.00204934	0.0107858	0.00197793	2.59507e-05	0.0009864	0.00158375	0.000207359	0.000440933	0.000856226	0.00015573	0.000129891	5.19252e-05	0.000207398	0.00020735	0	0.000233492	0.00297588	0.00130096	0.000129693	7.7763e-05	5.18893e-05
FBti0060285	INE-1{}2224	0	0	0	0.00014288	0.000285839	0.000142948	0.00014271	7.1403e-05	0	0	0.000143032	0	0.00049958	7.13521e-05	0.00014284	0	6.94267e-05	0	0	0	0
FBti0060286	INE-1{}2225	0	0	0	0.000237579	0.000237645	0.000237693	0	0	0	0	0	0	0	0	0	0	0	0	0	0	0
FBti0060287	INE-1{}2226	0.000307131	7.67428e-05	0.000462196	0.000460868	0.000614662	0.00038424	0	0.000230315	0.000153597	0	0.000692038	0	0	0.000153434	0.000307159	0	0	0	0	0	0
FBti0060288	INE-1{}2227	0	0	0	0	0	0	0	0	0	0	0	0	0	0	0	0	0	0	0	0	0
FBti0060289	NOF{}2228	5.62133e-05	5.61842e-05	0.000112793	0	0	0	0	0	5.62248e-05	0	0	0	0	0	0	0	0	0	0.000112416	0	0
FBti0060290	INE-1{}2229	0	0	0	0	0	0	0	0	0	0	0	0	0	0	0	0	0	0	0	0	0
FBti0060291	INE-1{}2230	0	0	0	0	0	0	0	0	0	0	0	0	0	0	0	0	0	0	0	0	0
FBti0060292	1731{}2231	0	0	0	0	0	0	0	0	0	0	0	0	0	0	0	0	0	0	0	0	0
FBti0060293	INE-1{}2232	0	0	0	0	0	0.000806905	0	0	0	0	0	0	0	0	0	0	0	0	0	0.000322239	0
FBti0060294	INE-1{}2233	0	0	0	0	0	0	0	0	0	0	0	0	0	0	0	0	0	0	0	0	0
FBti0060295	gypsy11{}2234	0	0	0	0	0	0	0	0	0	0	0	0	0	0	0	0	0	0	0	0	0
FBti0060296	INE-1{}2235	0	0	0	0	0	0.000140653	0	0	0	0.000140609	0	7.03253e-05	0	0	0	0	0	0	0	0	0
FBti0060297	INE-1{}2236	0.00532179	0.0064691	0.0109668	0.00532379	0.00676453	0.00475051	0.00531746	0.00575247	0.00460357	0.00849069	0.00705792	0.00532623	0.00761834	0.00704175	0.00402767	0.00834311	0.0062924	0.00605917	0.00704712	0.00833586	0.00661723
FBti0060298	F{}2237	0	0.000114085	2.29032e-05	4.56747e-05	4.56874e-05	0	0	0	0	0	0	0	6.84436e-05	0	0	4.56622e-05	2.21938e-05	6.86929e-05	0	0	2.28321e-05
FBti0060299	INE-1{}2238	0	0	0	0	0	0	0	0	0	0	0	0	0	0	0	0	0	0	0	0	0
FBti0060300	INE-1{}2239	0	0	0	0	0	0	0	0	0	0	0	0	0	0	0	0	0	0	0	0	0
FBti0060301	INE-1{}2240	0	0	0	0	0	0	0	0	0	0	0	0	0	0	0	0	0	0	0	0	0
FBti0060302	invader4{}2241	7.19161e-05	0.000143758	0.000288601	0.00818352	0.00930123	0.00827741	0.00635939	0.00692094	0.0073729	0.000197876	0.000216059	0.000395869	0.00016171	7.18546e-05	3.59614e-05	0.00021577	0.000436972	0.000450831	0.00278649	0.000215583	0.00044954
FBti0060303	INE-1{}2242	0.000413073	0	0	0	6.88905e-05	6.89042e-05	0	0	0	0	0	6.8903e-05	0	0	0	0	0	0	6.88391e-05	0	0
FBti0060304	INE-1{}2243	0	0.000337415	0	0	0	0.000168939	0	0	0	0	0	0	0	0	0	0	0	0	0.000168779	0	0
FBti0060305	INE-1{}2244	0	0	0	0	0	0	0	0	0	0	0	0	0	0	0	0	0	0	0	0	0
FBti0060307	1360{}2246	0	0	0	0	0	0	0	0	0	0	0	0	0	0	0	0	0	0	0	0	0
FBti0060308	INE-1{}2247	0	0	0	0	0	0	0	0	0	0	0	0	0	0	0	0	0	0	0	0	0
FBti0060309	copia{}2248	0.000470185	0.000445208	0.000471716	0.000618896	0.00118861	0.00108978	0.000420349	0.00081652	0.000816803	0.000495199	0.000569991	0.000297207	0.000420429	0.000791213	0.000272237	0.000395985	0.000721746	0.000446782	0.000717583	0.000791282	0.000495003
FBti0060310	INE-1{}2249	0	0	0	0	0	0	0	8.08229e-05	0	0.000323513	0	0	0.000161568	0	0	0	0	0	0	0	0
FBti0060311	copia{}2250	0	0	0	0	0.000557387	0	0.000556569	0.000278472	0.000835705	0.000278662	0.000278912	0	0.000556675	0.000278273	0.000278537	0.000557079	0.00162458	0.000558703	0.000556971	0.00139149	0
FBti0060312	Juan{}2251	0.000130182	0.000238544	0.000275725	0.000188112	0.000267772	0.000557366	0.000238473	0.000419417	0.000289353	0.00312607	0.00317958	0.00301117	0.00307906	0.00282543	0.00277748	0.000643744	0.000759366	0.000594842	0.00081718	0.000845535	0.00110671
FBti0060314	INE-1{}2253	0	0	0	0	0	0	0	0	0	0	0	0	0	0	0	0	0	0	0	0	0
FBti0060315	Ivk{}2254	0	0	0	0	0	0	0	0	0	0	0	0	0	0	0	0	0	0	0	0	0
FBti0060316	INE-1{}2255	0	0	0	0	0	0	0	0	0	0	0	0	0	0	0	0	0	0	0	0	0
FBti0060317	INE-1{}2256	0.000657431	0.000919926	0.000263829	0	0	0.00131598	0.000262758	0.000131467	0	0.0009209	0.000526702	0.000921171	0.000394212	0	0.000394495	0.000657497	0.000127828	0	0	0.000131385	0.000131505
FBti0060318	INE-1{}2257	0	0	0	0	0	0	0	0	0	0	0	0	0	0	0	0	0	0	0	0	0
FBti0060319	Cr1a{}2258	0.000755235	0.000590747	0.000823581	0.00542002	0.00519152	0.00338502	0.002756	0.00334882	0.00338283	0.000722789	0.0018086	0.000723001	0.00108292	0.00111548	0.00101802	0.0015763	0.00102153	0.00138328	0.00229832	0.00124682	0.00147785
FBti0060320	INE-1{}2259	6.66006e-05	0	6.68175e-05	0	0	0	0	0	6.66141e-05	0	0	0	0	0	0	0	0	0	0	0	0
FBti0060321	INE-1{}2260	0	0	0	0	0	0	0	0	0	0	0	0	0	0	0	0	0	0	0	0	0
FBti0060322	INE-1{}2261	0	0	0	0	0	0.000222191	0	0	0	0	0	0	0	0	0	0	0	0	0	0	0
FBti0060323	INE-1{}2262	0	0	0	0	0	0	0	0.00022197	0	0	0	0	0	0	0	0	0	0	0	0	0.000222034
FBti0060324	INE-1{}2263	0	0	0	0	0	8.61303e-05	0	0	0	0	0	0	0	0	0	0	0	0.000258949	0.000344195	0	0.000172139
FBti0060325	G4{}2264	0.000982951	0.000900081	0.00109835	0.00102454	0.00158435	0.00139615	0.00051754	0.000759176	0.000571051	0.000742028	0.000760378	0.000553739	0.000623518	0.000705707	0.000794674	0.00146574	0.00209432	0.00230243	0.00143015	0.00134684	0.00181313
FBti0060326	Tabor{}2265	0	0	0	0	0	0	0	0	0	0	0	0	0	0	0	0	0	0	0	0	0
FBti0060327	1360{}2266	0	0	0	0	0	0.000306624	0	0	0	0	0	0	0	0.000306101	0	0	0	0	0	0	0
FBti0060328	1360{}2267	0.000181741	0.000181646	0.00010419	7.7918e-05	0.000415678	0.00010394	0.000103767	0.000259592	0.000311619	0.000207816	0.000130002	0.000129923	0.000129733	0.000129704	5.19306e-05	0.000181759	5.04814e-05	0.000104165	0.000259605	0.000103772	0.000129833
FBti0060329	INE-1{}2268	0	0	0	0	0	0	0	0	0	0	0	0	0	0	0	0	0	0	0	0	0
FBti0060330	HB{}2269	0.00461779	0.00362283	0.0052057	0.00501689	0.00377614	0.00335448	0.0030264	0.00350008	0.00481738	0.00693042	0.00813005	0.00668398	0.00548329	0.00473786	0.00590932	0.00481688	0.00497205	0.00510484	0.00541173	0.00570577	0.00665454
FBti0060331	INE-1{}2270	0.000382157	0.000302384	0.000223651	3.18584e-05	0	4.78104e-05	3.18205e-05	3.18419e-05	7.96323e-05	7.96591e-05	4.78384e-05	7.96825e-05	1.59133e-05	4.77288e-05	0	0.000270722	0.000170283	0.000239568	0.000350278	0.000206843	0.000222957
FBti0060332	INE-1{}2271	0	0	0	0	0	0	0	0	0	0	0	0	0	0	0	0	0	0	0	0	0
FBti0060333	INE-1{}2272	0	0	0	0	0	0.000276238	0	0	0	0	0	0	0	0	0	0	0	0	0	0	0
FBti0060334	INE-1{}2273	0	0	0	0	0.000259799	0	0	0	0	0	0	0	0	0	0	0	0	0	0	0	0
FBti0060335	INE-1{}2274	0	0	0	0	0	0	9.76437e-05	0	4.88716e-05	0	0	0	0	0	0	0	0	0	0	0	9.77374e-05
FBti0060336	INE-1{}2275	0	0	0	0	0	0.000215175	0	0	0	0	0	0	0	0	0	0	0	0	0	0	0
FBti0060337	1360{}2276	0	0	0	0	0	0	0	0	0	0	0	0	0	0	0	0	0	0	0	0	0
FBti0060338	INE-1{}2277	0	0	0	0	0	0	0	0	0	0	0	0	0	0	0	0	0	0	0	0	0
FBti0060339	Tc1-2{}2278	0	0	0	0	0	0	0	0	0	0	0	0	0	0	0	0	0	0	0	0	0
FBti0060340	Tc3{}2279	0.0128944	0.00915705	0.0124987	0.0102321	0.0116901	0.00882999	0.0109949	0.0124078	0.00853336	0.00950626	0.011408	0.0147972	0.0140974	0.0123021	0.00867784	0.0111504	0.00975521	0.00734181	0.0101788	0.0104141	0.0104236
FBti0060341	flea{}2280	0.000321641	0.000562579	0.00040336	0.000160881	0.000563239	0.000804787	0.000241034	0.000160797	0.000321706	0.000402268	0.000322104	0.000321909	0	0.000241024	0	0	7.81733e-05	0.000564568	0.000402013	8.03483e-05	0.00048253
FBti0060342	jockey2{}2281	0	0.0001303	0	0	0.000521809	0.000391435	0	0	0	0	0	0	0.000130286	0	0	0	0	0	0	0	0
FBti0060343	INE-1{}2282	0	0	0	0	0	0	0	0	0	0	0	0	0	0	0	0	0	0	0	0	0
FBti0060344	INE-1{}2283	0	0	0	0	0	0	0	0	0	0	0	0	0	0	0	0	0	0	0	0	0
FBti0060345	invader4{}2284	0.00358086	0.00764745	0.00396099	0.00199011	0.00682952	0.0275992	0.00422014	0.00422298	0.00572442	0.00581822	0.00649774	0.00532983	0.003181	0.00363896	0.0014386	0.00260174	0.00285641	0.0029777	0.00257063	0.002049	0.00299978
FBti0060346	INE-1{}2285	0	0	0	0	0	0	0	0	0	0	0	0	0	0	0	0	0	0	0	0	0
FBti0060347	GATE{}2286	0.000241231	0	0.000121008	0.000844623	0.000241388	0.000724308	0.000602585	0	0.00024128	0	0	0	0	0	0	0	0	0	0.000120604	0.000120523	0.000120633
FBti0060348	FB{}2287	0	0	0	0	0	0	0	0	0	0	0	0	0	0	0	0	0	0	0	0	0
FBti0060350	INE-1{}2289	0	0	0	0	0	0	0	0	0	0	0	0	0	0	0	0	0	0	0	0	0
FBti0060351	INE-1{}2290	0	0	0	0	0	0	0	0	0	0	0	0	0	0	0	0	0	0	0	0	0
FBti0060352	INE-1{}2291	0	0	0	0	0	0	0	0	0	0	0	0	0	0	0	0	0	0	0	0	0
FBti0060353	INE-1{}2292	0	0	0	0	0	0	0	0	0	0	0	0	0	0	0	0	0	0	0	0	0
FBti0060354	INE-1{}2293	0	0	0	0.000431658	0.000143926	0	0	0.000575247	0	0	0	0	0	0.000287418	0	0	0	0.000144266	0	0	0
FBti0060355	INE-1{}2294	0	0	0.000115549	0.000460868	0.000230498	0.000345816	0.00011508	0.000115157	0	0	0	0	0	0	0	0	0	0	0	0	0.000230381
FBti0060356	diver2{}2295	0.000832638	0.00129488	0.000995182	0.00140729	0.00169644	0.00265047	0.000612707	0.000766398	0.000838821	0.000541357	0.000635161	0.000529482	0.000534718	0.000492548	0.000474978	0.00149409	0.00183228	0.00182105	0.00163206	0.00210853	0.00187897
FBti0060357	FB{}2296	0.000615805	0.000634719	0.00055989	0.00051978	0.000751002	0.00067411	0.000288423	0.000538752	0.000153982	0.000693154	0.000462518	0.000751138	0.000461564	0.000576823	0.000404159	0.000577374	0.000710925	0.000868586	0.000654231	0.000865309	0.000538906
FBti0060358	Cr1a{}2297	0.0141666	0.0121765	0.0131909	0.296661	0.292873	0.270339	0.307861	0.308015	0.280159	0.0255221	0.0271407	0.0322459	0.0182965	0.0164237	0.0152645	0.020457	0.0235947	0.0199649	0.0419954	0.0331836	0.0358616
FBti0060359	invader1{}2298	0	0	0	0	0	0	0	0	0	0	0	0	0	0	0	0	0	0	0	0	0
FBti0060360	transib2{}2299	0	0	0	0	0	0	0	0	0	0	0	0	0	0	0	0	0	0	0	0	0
FBti0060361	invader1{}2300	0.00338315	0.00131499	0.00131995	0.00225628	0.00282113	0.00338603	0.00244139	0.00225511	0.00187991	0.00470135	0.00207045	0.00338597	0.00488371	0.00431921	0.00206767	0.00319551	0.00182724	0.00282779	0.00206728	0.00187808	0.00281969
FBti0060362	invader1{}2301	0	0.000362371	0	0	0	0	0	0	0	0	0	0	0	0	0.000181296	0	0.000176237	0	0	0	0.000362611
FBti0060363	invader6{}2302	0.00054854	0.000869647	0.000480745	0.000479364	0.0012366	0.00433527	0.000214197	0.000264774	0.000466669	0.000441593	0.000675612	0.000643652	0.000365465	0.000251986	0.000113501	0.00111611	0.000815245	0.000942286	0.000743927	0.000642621	0.000599066
FBti0060364	invader6{}2303	0.00334141	0.00591485	0.00214062	0.00213447	0.00487439	0.0217175	0.00217216	0.00237488	0.00310049	0.00386685	0.0043138	0.00354565	0.0022128	0.00213184	0.000805232	0.00221441	0.00207432	0.00173631	0.0019322	0.00233316	0.00201318
FBti0060365	invader6{}2304	0	0	0	0	0	0	0	0	0	0	0	0	0	0	0	0	0	0	0	0	0
FBti0060366	frogger{}2305	0.00392984	0.0039278	0.00497474	0.0231968	0.0297916	0.0315273	0.00481064	0.00493731	0.00514481	0.00131752	0.00224591	0.00181212	0.000822488	0.00115122	0.00111116	0.00240752	0.00250034	0.00303365	0.00339457	0.00335116	0.0027163
FBti0060368	jockey{}2307	0	0	0	0	0	0	0	0	0	0	0	0	0	0	0	0	0	0	0	0	0
FBti0060369	INE-1{}2308	0	0	0	0	0	0	0	0	0	0	0	0	0	0	0	0	0	0	0	0	0
FBti0060370	INE-1{}2309	0.000215748	0.00215637	0.000865804	0.00172663	0.000647668	0.000647797	0.00194015	0.00215717	0.00172634	0.00086346	0.000864236	0.00107964	0.00194052	0.00323346	0.000431536	0.00021577	0.00125848	0.00108199	0.000431456	0.0012935	0.0010789
FBti0060371	INE-1{}2310	0	0	0	0	0	0	0	0	0	0	0	0	0	0	0	0	0	0	0	0	0
FBti0060372	INE-1{}2311	0.000510605	0.000127585	0.000256134	0.000255398	0.000766407	0.0012776	0.000765283	0.000382898	0.000127677	0.0012772	0.00230103	0.00191636	0.00127571	0.00165804	0.0010213	0.000127664	0.0001241	0.000384108	0.000127639	0.00114798	0.000893686
FBti0060373	1360{}2312	0.000849042	0.000813244	0.000887299	0.00081397	0.000743397	0.00131006	0.000530219	0.000813549	0.000636911	0.000424751	0.000531415	0.00028325	0.000353546	0.000494851	0.00045994	0.000919888	0.000962994	0.000674185	0.00155643	0.000954438	0.000955309
FBti0060374	INE-1{}2313	0.000224442	0	0	0.000112263	0.000224588	0.000449266	0.000112129	0.000448819	0.000224487	0	0.000112382	0	0	0	0	0.000224464	0	0.000112559	0.00022442	0	0
FBti0060375	INE-1{}2314	0.000335189	0	0.000134512	0.000134126	6.70816e-05	0.000201285	0	0	0.000134103	0	0	0.000134187	0	6.69804e-05	0	0	0	0	0	0	0
FBti0060376	INE-1{}2315	0	0	0	0	0	0	0	0	0	0	0	0	0	0	0	0	0	0	0.00017307	0	0
FBti0060377	INE-1{}2316	0.000116932	0.000350615	0	0	0	0	0	0	0	0	0	0.00011703	0	0	0	5.8472e-05	0	0.00023457	0	0	5.84745e-05
FBti0060378	gypsy8{}2317	0.000226197	0.00043332	0.000421449	0.00019665	0.000342212	0.00078967	0.000150675	0.000150777	0.000185843	0.000177823	0.000196859	0.000115888	0.000129175	0.000107621	0.000118495	0.000282775	0.000246084	0.000332216	0.000253102	0.000269075	0.000307026
FBti0060379	INE-1{}2318	0	0	0.000246876	0	0	0.000123142	0	0	0	0	0	0	0	0	0	0	0	0	0	0	0
FBti0060380	INE-1{}2319	0	0	0.000245888	0	0	0	0	0	0	0	0	0	0	0	0	0	0	0	0	0	0
FBti0060381	G6{}2320	0.000661431	0.0011569	0.00128192	6.01526e-05	0.000180508	0.000436315	0.000105142	0.000150304	0.000225534	7.52032e-05	6.02166e-05	9.02704e-05	6.00925e-05	0.000120157	3.00678e-05	9.02041e-05	8.76861e-05	3.01557e-05	9.01866e-05	3.00419e-05	3.00693e-05
FBti0060382	INE-1{}2321	0.000291774	0	0	0	0	0.000876068	0	0	0	0	0	0	0	0.000291524	0	0	0	0	0	0	0
FBti0060383	INE-1{}2322	0	0	0	0	0	0	0	0	0	0	0	0	0	0	0	0	0	0	0	0	0
FBti0060384	INE-1{}2323	0.000481702	0.000385162	0.00135316	0.000481883	0.00183166	0.00038569	0.000385048	0.00028898	9.63601e-05	0.000481963	0.00106127	0.00144631	0.000866522	0.00105884	0.00105984	9.63501e-05	0.000749284	0.000386524	0.000288994	0.000385066	0.00115625
FBti0060385	INE-1{}2324	0	0	0	0	0	0	0.000336388	0	0	0.000336844	0	0	0	0	0	0	0	0	0	0	0
FBti0060386	INE-1{}2325	0.000220405	0.000440581	0.00132674	0.000661462	0.00110274	0.00110296	0.00110113	0.000440746	0.0013227	0.000661572	0.00110361	0.00220589	0.000660801	0.000440432	0.00044085	0.000220427	0.000857095	0.000663208	0.000661152	0.00110118	0.000220436
FBti0060387	Circe{}2326	0.00101494	0.00202884	0.00131995	0.000188023	0.000714686	0.00270882	0.000262919	0.000263096	0.00127834	0.000225665	7.52892e-05	0.000188109	0.000300536	0.00022535	3.7594e-05	0.000751886	0.000913621	0.000867189	0.000338283	0.000375616	0.000338363
FBti0060388	S{}2327	0	0.0003876	0.000129688	0	0	0	0.000129162	0	0	0	0.000129453	0	0	0	0	0.00025856	0	0	0.000517019	0	0.000129285
FBti0060389	1360{}2328	0	3.6024e-05	0	0	0	0.000144294	0.000144053	0	0	0	0	0	7.20402e-05	0	0	7.20926e-05	0	7.23027e-05	0	0	0
FBti0060390	HMS-Beagle2{}2329	7.15801e-05	7.1543e-05	0	0.0010025	0.000644641	0.0015761	0.000929783	0.000357849	0.000715946	0	0	0	0	0	0	0	6.95889e-05	0	0	0	0
FBti0060391	HMS-Beagle{}2330	0.000572641	0.00107314	0.000574505	0.00143214	0.00229206	0.00716411	0.00250326	0.00200395	0.00286379	7.16188e-05	0	0	0.000286141	0	0	0.000143174	0.000208767	0	0.000143147	0.000214575	0
FBti0060392	I{}2331	0	0	5.00587e-05	0	0	0	0	0	0	0	0	9.98757e-05	0	0	0	0	0	0	0	0	0
FBti0060393	INE-1{}2332	0.00103268	0.000860123	0.00172674	0.00137743	0.00120558	0.000172261	0.000687895	0.00103254	0.000172149	0.00120545	0.00103417	0.00137806	0.000516019	0.0005159	0.00189343	0	0.00150593	0.0010358	0.000516293	0.000171982	0.000516416
FBti0060394	INE-1{}2333	0	0	0	0	0	0	0	0	0	0	0	0	0	0	0	0	0	0	0	0	0
FBti0060395	INE-1{}2334	0.00111811	0.00111753	0.000224351	0.000671118	0.000447537	0	0.000893761	0.00134154	0.00134201	0.00290866	0.000447889	0.00134285	0.00201134	0.00111716	0.00134186	0	0.000434803	0.00067289	0.00201241	0	0
FBti0060396	mdg1{}2335	4.75165e-05	5.93648e-05	9.53425e-05	0.00116459	0.000962837	0.000737134	0.000391692	0.000641381	0.000677248	5.94277e-05	0	3.56671e-05	2.37434e-05	4.74758e-05	0	4.75213e-05	6.92921e-05	0.000190639	3.5634e-05	8.309e-05	1.18808e-05
FBti0060397	INE-1{}2336	0	0	0	0	0	0	0	0	0	0	0	0	0	0	0	0	0	0	0	0	0
FBti0060398	INE-1{}2337	0	0	0.000136	0	0	0	0	0	0	0	0	0	0	0	0	0	0.000263576	0	0	0	0
FBti0060399	INE-1{}2338	0	0	0	0	0	9.9231e-05	0	0	0	0	0	0	0	0	0	0	0	0	0	0	0
FBti0060400	micropia{}2339	0	0	0	0	0	0	0	0	0	0	0	0	0	0	0	0	0	0	0	0	0
FBti0060401	INE-1{}2340	0	0.000149368	0	0	0	0.000149573	0	0	0	0	0	0	0	0	0	0	0	0	0	0	0
FBti0060402	micropia{}2341	0	0.000131984	0.000529932	0	0	0	0	0	0	0	0	0	0	0	0	0	0.000256759	0	0	0	0
FBti0060403	INE-1{}2342	0	0	0	0	0	0	0	0	0	0	0	0	0	0	0	0	0	0	0	0	0
FBti0060404	1731{}2343	0	0.000223506	0	0	0	0	0	0	0	0	0	0	0	0.000223431	0	0	0	0	0	0.00022345	0
FBti0060405	INE-1{}2344	0	0	0	0	0	0	0	0	0	0	0	0	0	0	0	0	0	0	0	0	0
FBti0060406	looper1{}2345	0.000462684	0.000462444	0.000447612	0.000909183	0.000661408	0.000678079	0.000198131	0.00016522	0.0002975	0.000496	0.000297868	0.000429993	0.00044588	0.000495308	0.000297467	0.00084283	0.000963885	0.0011602	0.000644392	0.000842097	0.0009255
FBti0060407	INE-1{}2346	0	0	0	0	0	0	0	0	0	0	0	0	0	0	0	0	0	0	0	0	0
FBti0060408	INE-1{}2347	0	0	0	0	0	0	0	0	0	0	0	0	0	0	0	0	0	0	0	0	0
FBti0060409	INE-1{}2348	0.000268739	0.0005372	0.000323537	0.000215072	5.37829e-05	0.00112967	0.000375928	0.000268701	0.000752623	0.000537769	0.000538252	0.000484134	0.000107428	0.000375913	0.000322517	0.000107506	0.000313516	0.000323459	0.000322457	0.000375946	0.000107511
FBti0060410	INE-1{}2349	0	0	0	0	0	0	0	0	0	0	0	0	0	0	0	0	0	0	0	0	0
FBti0060411	INE-1{}2350	0	0	0	0	0	0	0	0	0	0.00019158	0	0.000191636	0	9.56564e-05	0.000191494	0	0	0	0	0.000191329	0
FBti0060412	INE-1{}2351	0	0	0	0	0.000251281	0	0	0	0	0	0	0	0	0	0	0	0	0	0	0	0
FBti0060413	invader6{}2352	0.000827608	0.0023486	0.00158647	0.000783565	0.00273585	0.00965873	0.0010632	0.00187663	0.00125645	0.00236587	0.0024568	0.00153827	0.00103386	0.00109269	0.000768564	0.000990273	0.00122125	0.0012748	0.00113785	0.000826972	0.000960754
FBti0060414	gypsy4{}2353	0.000418719	0.000488252	0.000297558	0.000401423	0.000855443	0.001816	0.00043581	0.000662877	0.000628206	8.72803e-05	0.000174717	1.74612e-05	8.71785e-05	0.000139454	0	0.000279174	0.000186574	0.00022749	0.000157005	0.000296365	0.000174491
FBti0060415	gypsy8{}2354	0.000143736	0.000451507	0.000185405	0	8.21884e-05	0.000431575	0.000164136	8.2123e-05	6.16136e-05	0	0	4.11017e-05	6.15625e-05	2.05161e-05	0	0.000102679	0	8.23824e-05	0.000102659	0.000123107	4.10733e-05
FBti0060416	roo{}2355	0.000650298	0	0.000144981	0.000216847	7.23025e-05	0.00101244	0.000144393	0.00043347	0.00050589	0.000216883	0.000434156	0	0	0.000144387	0.00036131	0.000216788	0.000210736	0.000289893	0.000144497	0	0.000144531
FBti0060417	INE-1{}2356	0.000118287	0	0.000474688	0.000118331	0.000946912	0.000118388	0.000236381	0.00023654	0.000236622	0.000118351	0	0	0	0.000236371	0.00047319	0	0.000344989	0	0.000118276	0	0
FBti0060418	gypsy{}2357	0.000188338	9.412e-05	0	0.000125605	6.28202e-05	0.000251331	6.27281e-05	0.00012554	6.2792e-05	6.28132e-05	0.000220044	0.000125663	6.274e-05	0.000250902	0	0	0.000183099	0.000251874	0	0.000125462	0.000125576
FBti0060419	springer{}2358	0	0	0	0.000178185	8.91171e-05	8.91349e-05	0	0	0	0	0	0	0	0	8.90671e-05	0	0	0	0	0	0
FBti0060420	Rt1b{}2359	4.26689e-05	0.000170587	8.56157e-05	0.00017074	8.53935e-05	0.000341642	4.26341e-05	0.000213314	0.00017071	4.2692e-05	0	4.27045e-05	8.52844e-05	4.26324e-05	0.000170691	8.53463e-05	0.000124446	0.000256785	0	0	0
FBti0060421	INE-1{}2360	0	0	0	0	0	0	0	0	0	0	0	0	0	0	0	0	0	0	0	0	0
FBti0060422	INE-1{}2361	0	0	0	0	0	0	0	0	0	0	0	0	0	0	0	0	0	0	0	0	0
FBti0060426	INE-1{}2365	0	0	0	0	0	0	0	0	0	0	0	0	0	0	0	0	0	0	0	0	0
FBti0060427	opus{}2366	0.00185674	0.0016702	0.00149023	0.00172476	0.00151291	0.00135392	0.00222628	0.0027582	0.00191018	0.00207006	0.00193911	0.00284053	0.00273036	0.00161663	0.0022283	0.000742772	0.00146986	0.000824752	0.00122003	0.00140474	0.00119379
FBti0060428	297{}2367	0	0	0	0	0	0.000567822	0	0	0.000283727	0	0	0	0	0	0	0	0	0	0	9.44837e-05	0
FBti0060429	H{}2368	0	0	0	0	0	0	0	0	0	0	0	0	0	0	0	0	0	0	0	0	0
FBti0060431	297{}2370	3.21135e-05	0	6.44361e-05	0	0.000128538	0.000192845	0	9.63267e-05	0	0	6.43194e-05	0	0	0	0	0	3.12202e-05	6.44206e-05	0	3.20888e-05	0
FBti0060432	297{}2371	0	0	0	0	0	0	0	0	0	0	0	0	0	0	0	0	0	0	0	0	0
FBti0060433	H{}2372	0.000939043	0.000821236	0.00176644	0.00152652	0.0016444	0.00152725	0.000703708	0.00117364	0.000234808	0.00093955	0.00223344	0.0010573	0.000821148	0.0011728	0.000586956	0.00129131	0.00125527	0.00129508	0.000117369	0.000703741	0.000704383
FBti0060434	mdg1{}2373	0	0	0	0	0	0	0	0	0	0	0	0	0	0	0	0	0	0	0	0	0
FBti0060435	springer{}2374	0	0	0	0	0	0	0	0	0	0	0	0	0	0	0	0	0	0	0	0	0
FBti0060436	Doc{}2375	0.00337375	0.00332661	0.0036451	0.00417334	0.00414853	0.00394157	0.00454437	0.00451499	0.00363401	0.00415456	0.00512639	0.00404539	0.00389684	0.00341624	0.0043214	0.00338707	0.00364574	0.0035336	0.00355508	0.00322205	0.0042178
FBti0060437	Doc{}2376	0.00189449	0.00224368	0.00221961	0.00312838	0.00277867	0.00303897	0.00234025	0.00243913	0.0021869	0.00268099	0.00304725	0.00288307	0.00221102	0.00184749	0.00262139	0.00213476	0.00249146	0.00203686	0.00210191	0.00193193	0.00240739
FBti0060438	S{}2377	0	0	0	0	0	0	0	0	0	0	0	0	0	0	0	0	0	0	0	0	0
FBti0060442	G4{}2381	0.00341472	0.00245155	0.00289507	0.00245374	0.0022138	0.00312882	0.00283527	0.00163498	0.00182797	0.00168422	0.00303432	0.0012515	0.00245129	0.0020663	0.00250115	0.00303026	0.00374054	0.00337677	0.00336631	0.002499	0.00341521
FBti0060443	1360{}2382	0	0	0	0	0	0	0	0	0	0	0	0	0	0	0	0	0	0	0	0	0
FBti0060444	G4{}2383	0.00587206	0.00577792	0.00681862	0.00677298	0.00536778	0.00319264	0.00429313	0.00618366	0.00563885	0.00781628	0.00852739	0.00556422	0.00476237	0.0046572	0.00450536	0.00304701	0.003848	0.00331707	0.00420509	0.00513898	0.00554735
FBti0060445	G4{}2384	0.00048773	0.000895598	0.000716909	0.00116872	0.00169115	0.00135092	0.000408	0.00060107	0.000692037	0.00118026	0.00105638	0.000601658	0.000657457	0.00039665	0.000669273	0.00172424	0.00157687	0.00172927	0.00233635	0.00279946	0.00293815
FBti0060446	Rt1b{}2385	0.00134173	0.000670519	0.00201916	0.00111853	0.000671305	0.00156669	0.000893761	0.00134154	0.000671004	0.000447487	0.00156761	0.00201428	0.0013409	0.000893724	0.00178914	0.00111822	0.00152181	0.00134578	0.00178881	0.0013407	0.00156558
FBti0060447	INE-1{}2386	0	0.000290241	0	0	0	0	0	0	0.000145225	0	0	0	0	0	0	0.00014521	0	0	0.000145182	0	0
FBti0060448	G5A{}2387	0	0	0	0	0	0	0	0	0	0	0	0	0	0	0	0	0	0	0	0	0
FBti0060449	G5A{}2388	0.000427664	0.000641163	0.000487564	0.000486163	0.000855886	0.000797689	0.000291351	0.000310984	0.000622183	0.000213947	0.000272541	0.000233466	0.000291406	0.000349607	0.000155528	0.000524913	0.000699244	0.000389957	0.000408186	0.000310789	0.000602703
FBti0060450	BS3{}2389	0.0029648	0.0064204	0.00586629	0.00601421	0.00519179	0.00609951	0.00485502	0.00625813	0.00444811	0.00824001	0.0100618	0.00511031	0.00658432	0.00205713	0.0053536	0.00609492	0.00376304	0.00280853	0.00650548	0.00559587	0.00790727
FBti0060452	BS3{}2391	0.0011671	0.000874868	0.00351269	0.00321072	0.00291964	0.00204416	0.00233229	0.00320905	0.00408567	0.00496284	0.00613607	0.00350421	0.00204114	0.00291524	0.0017508	0.00262623	0.00170194	0.00117062	0.00320921	0.00262395	0.00437724
FBti0060453	BS3{}2392	0	0	0.000234626	0	0.000468035	0.000468128	0	0	0	0	0	0	0	0	0	0	0	0	0	0	0
FBti0060454	BS3{}2393	6.30376e-05	0.000409532	0.000284593	0	9.46181e-05	0.000189274	0	0	0	0	6.31283e-05	0	0	0	0	6.30439e-05	3.0642e-05	0.000158069	0	6.29891e-05	0
FBti0060455	INE-1{}2394	0	0	0	0	0	0	0	0	0	0	0	0	0	0	0	0	0	0	0	0	0
FBti0060456	INE-1{}2395	0	0	0	0	0	0	0	0	0	0	0	0	0	0	0	0	0	0	0	0	0
FBti0060458	1360{}2397	0.000500866	0.000139057	0.000139582	2.78363e-05	0.000111376	0.000362045	5.56064e-05	5.56437e-05	5.5663e-05	0.000111364	0.000111464	0	2.78085e-05	0.000305822	5.56568e-05	0.000111315	0.000351673	0.000195368	0.000194763	0.000278045	0.000222639
FBti0060459	TART-A{}2398	0	0	0	0	0	0	0	0	0	0	0	0	0	0	0	0	0	0	0	0	0
FBti0060460	1360{}2399	0.000449707	0.000252829	0.000535766	0.000590461	0.00061875	0.00087205	0.000954848	0.000674463	0.000449798	0.000365584	0.000140736	0.000253171	0.000112356	0.000308909	0.000140546	0.000281095	0.000245923	0.00039468	0.000252936	0.000337021	0.000196775
FBti0060461	1360{}2400	0.000139637	0.000139564	0	0.00025144	0.000223564	0.000307462	0.000167427	0.000279233	0.000111732	5.58848e-05	0.00022374	2.79506e-05	0.000167459	0.000223227	0.000307229	0.000223441	5.43009e-05	2.80115e-05	5.58494e-05	0.000111623	0.000167588
FBti0060462	1360{}2401	0.000666006	0.000221887	0.000318178	0	0.000476029	0.000126966	0.000633774	6.342e-05	0.000158605	0.000222122	0.000254082	0.000158705	0.000190168	0.000411936	0.00025374	0.000380613	0.000369988	0.000318102	0.000317116	0.000411972	0.000380629
FBti0060463	Juan{}2402	0	0	0	0	0	0	0	0	0	0	0	0	0	0	0	0	0	0	0	0	0
FBti0060464	gypsy12{}2403	0	0	0	0	0	0	0	0	0	0	0	0	0	0	0	0	0	0	0	0	0
FBti0060466	INE-1{}2405	0	0.000222694	0.000223535	0	0	0.000445998	0.000111314	0.000556943	0.000222855	0.000891719	0.00044626	0.00044599	0.00022267	0.0012244	0.000111415	0.00111416	0.000216611	0.000446962	0.000891153	0	0.000222841
FBti0060467	1360{}2406	0	0.000658503	0.000330495	0.000823864	0.000329637	0.00164852	0.000658308	0.000494063	0.000329489	0	0	0.000329697	0.000164608	0.00016457	0	0.000329455	0.000480388	0.000165208	0.00164696	0.00131668	0.000823674
FBti0060468	1360{}2407	0	7.6551e-05	0	0	0	0	0	0	0	0	0	0	0	0	0	0	0	0	0	0	0
FBti0060469	1360{}2408	0	0	0	0	0	0	0	0	0	0	0	0	0	0	0	0	0	0	0	0	0
FBti0060470	Cr1a{}2409	0.00126771	0.00042235	0.00190775	0.000634091	0.00105711	0.000211465	0.000422225	0.00126753	0.000422655	0.000634196	0.00126953	0.000422922	0.00190037	0.000422208	0.000211304	0.00169045	0.000616221	0.000847687	0.000845059	0.00168898	0.00169052
FBti0060471	Cr1a{}2410	9.89331e-05	0.000148323	0.00019851	6.59801e-05	0.000197995	0.000264046	9.88524e-05	8.24324e-05	8.2461e-05	6.5991e-05	0.000148613	3.30052e-05	0.000131828	6.58989e-05	0.000230865	0.000395772	8.01508e-05	0	0.000131898	0.000230666	0.000115438
FBti0060472	Cr1a{}2411	0.00344365	0.00394597	0.00369914	0.00417568	0.00388968	0.00418638	0.00367544	0.00365183	0.00340086	0.00315838	0.00363148	0.00356837	0.0035284	0.00332775	0.0033396	0.00321787	0.00399037	0.00304408	0.00386069	0.00379726	0.00397468
FBti0060473	17.6{}2412	0.000599355	0.00108289	0.000555053	0.00172956	0.00156857	0.00156888	0.0002764	0.000553172	0.00057642	0.000230646	0.000623303	0.000161499	0.000184302	0	0.000184434	0.000922177	0.000806791	0.000947987	0.00135995	0.000875307	0.00142944
FBti0060474	Stalker4{}2413	0.00264479	0.00276357	0.00259551	0.00312683	0.00294004	0.00376361	0.00330569	0.00325022	0.00276076	0.00333905	0.00398252	0.0037443	0.00307565	0.0026137	0.0032606	0.00276047	0.00301066	0.00270582	0.00274551	0.00247458	0.0034291
FBti0060475	flea{}2414	4.54544e-05	0	4.56024e-05	0	4.54841e-05	0.000432185	0	4.54479e-05	4.54637e-05	0	0	2.27462e-05	0	0	0	6.81884e-05	6.62849e-05	0.000136774	4.54501e-05	4.54195e-05	4.54609e-05
FBti0060476	G{}2415	4.43041e-05	0.000177124	2.22242e-05	0.000110802	0.000199498	0.000177367	8.8536e-05	4.42977e-05	8.86262e-05	8.8656e-05	8.87357e-05	0.000133023	0.000110691	6.63992e-05	4.43081e-05	0.000177234	8.61433e-05	0	0.000332249	0.000154945	4.43104e-05
FBti0060477	R1A1{}2416	0.000101277	0.000354285	0.000279419	0	5.06715e-05	0.000253408	0.00017709	5.06312e-05	0.000126622	5.06658e-05	0	0	0	0	0	0	9.84596e-05	0.000101582	0	0	0
FBti0060478	R1A1{}2417	0	5.83246e-05	0	0	0	0.000175214	0	0	0.000116733	0	0	0	0	0	0	0	0	0	0	0	0
FBti0060479	HMS-Beagle{}2418	0.0116207	0.0042235	0.00694799	0.0102159	0.00822199	0.00704883	0.00645066	0.00657236	0.00669204	0.00739896	0.00505462	0.00881087	0.00997109	0.00856143	0.00809999	0.0104479	0.0103845	0.00777046	0.00715953	0.00867947	0.00469589
FBti0060480	Cr1a{}2419	0	0	0	0	0	0	0	0	0	0	0	0	0	0	0	0	0	0	0	0	0
FBti0060481	Cr1a{}2420	0.000173195	0.000269275	0.000125493	0.000163634	0.000192565	0.000693371	0.000124983	0.000211652	0.000163606	0.000125153	0.000134901	0.000192599	0.000105775	0.000249956	9.62283e-05	0.000163589	0.000187086	0.000250925	0.000259768	0.00021152	0.000269453
FBti0060482	Cr1a{}2421	0.000650526	0.000650189	0.000908411	0.000641976	0.000510205	0.000897436	0.000641212	0.000404323	0.00058911	0.000879565	0.000633855	0.00054549	0.000360201	0.000395252	0.000395627	0.000852802	0.000854635	0.000731844	0.000905377	0.000746652	0.000782502
FBti0060483	Cr1a{}2422	0.000319683	0.000710038	0.000338542	0.000106601	0.000248805	0.00087099	0.000230694	0.000337395	0.000408567	0.000337625	0.000480214	0.000373274	0.000301734	0.000195195	0.000248665	0.00046181	0.000258992	0.000320647	0.000532755	0.00035493	0.000319729
FBti0060484	jockey2{}2423	0.000135259	0	0	0.00027062	0.000135348	0.000406124	0	6.762e-05	0	0	6.77271e-05	0.000135372	0.000202762	0	0.000270544	0	6.57484e-05	0	0.00020287	0.000135155	0.000473476
FBti0060485	G{}2424	0	8.85622e-05	0	6.6481e-05	0.000110832	0	4.4268e-05	8.85955e-05	2.21565e-05	0	8.87357e-05	0	0	0	0	0	8.61433e-05	6.66565e-05	0	4.427e-05	4.43104e-05
FBti0060486	R1A1{}2425	7.59577e-05	0.000607347	0.00030482	0	7.60073e-05	0.000228067	5.05972e-05	5.06312e-05	0.000278568	0	0	0	0	0	5.06431e-05	2.53218e-05	7.38447e-05	0.000152373	0	5.05995e-05	0
FBti0060487	flea{}2426	0.00922063	0.00851703	0.00970408	0.00882992	0.00884011	0.00763177	0.011363	0.0119499	0.0107139	0.0130558	0.0128779	0.013164	0.00932681	0.00924361	0.0090824	0.0102917	0.010271	0.0106394	0.0118115	0.0126527	0.0128304
FBti0060488	baggins{}2427	0.000832096	0.00158772	0.00159372	0	0.00068125	0.00105993	0.000604668	0	0.000907926	0	0	0	0.000302391	0.000604643	0	0.000302611	0.000147082	0.00022762	7.5638e-05	7.5587e-05	0
FBti0060489	ninja-Dsim-like{}2428	0.000463033	0.00119819	0.000509085	0.000101525	0.000374476	0.000787192	6.97152e-05	0.000183918	0.000298178	0.000184044	6.98725e-05	6.34821e-05	0.000164813	7.60498e-05	2.5374e-05	0.000145902	0.000258992	0.000324464	0.000133189	0.000253521	6.9782e-05
FBti0060490	INE-1{}2429	0	0	0	0	0	0	0	0	0	0	0	0	0	0	0	0	0	0	0	0	0
FBti0060493	INE-1{}2432	0	0	0	0	0	0	0	0	0	0	0	0	0	0	0	0	0	0	0	0	0
FBti0060494	INE-1{}2433	0.000230348	0	0	0	0	0	0	0	0	0.000230472	0	0.00069162	0.000460408	0	0	0	0	0.000231042	0	0	0
FBti0060495	INE-1{}2434	0.000238724	0.0002386	0.000479003	0	0.000159253	0.00135392	0.00023853	0.000159127	7.95909e-05	0.000318471	0.000557825	0.000637129	0	0.000318026	0.000159164	7.95827e-05	0.000309445	0	0.000159134	7.95135e-05	0.000318345
FBti0060496	INE-1{}2435	0	0	0	0	0	0	0	0	0	0	0	0	0	0	0	0	0	0	0	0	0
FBti0060497	INE-1{}2436	0.00199136	0.000612408	0.00199784	0.00168563	0.00214594	0.00199306	0.000918339	0.00382898	0.00107249	0.00260549	0.00291463	0.00199302	0.00137777	0.0015305	0.000765977	0.00214475	0.00134028	0.0010755	0.00168484	0.00107145	0.00168524
FBti0060498	INE-1{}2437	0	0	0	0	0	0	0	0	0	0	0	0	0	0	0	0	0	0	0	0	0
FBti0060499	blood{}2438	0.000504564	0.00063398	0.000609514	0.000500632	0.000531683	0.000865703	0.00430484	0.00463308	0.00419594	0.00556556	0.00651927	0.00610516	0.0017803	0.00169347	0.00163947	0.00290205	0.00317141	0.00289191	0.0027944	0.00290158	0.00294337
FBti0060500	INE-1{}2439	0.0328025	0.0371929	0.0441636	0.0355235	0.0342174	0.0318238	0.031307	0.0379031	0.0386127	0.0414897	0.0352514	0.035385	0.0402816	0.0374123	0.0394594	0.0331152	0.0370796	0.0388764	0.0382917	0.0412808	0.0413185
FBti0060501	Stalker4{}2440	0.000702951	0.00123573	0.000999782	0.000248193	0.000310328	0.000579395	0.000148739	0.000152973	0.000173706	0.000136529	0.000140793	0.0001076	0.00013637	0.000115681	0.00010752	0.000454896	0.000373858	0.000356683	0.000330769	0.000194196	0.000285356
FBti0060502	INE-1{}2441	0	0	0	0	0	0	0	0	0	0	0	0	0	0	0	0	0	0	0	0	0
FBti0060503	Stalker4{}2442	0.000235392	0.000188216	0.000307006	0.00011774	0.000235546	0.000365169	0.00010584	0.000176519	0.000164808	9.42077e-05	8.25058e-05	2.35588e-05	5.88112e-05	3.52786e-05	0	8.23955e-05	0.000137306	0.000165271	0.000164759	0.00021169	0.000129484
FBti0060504	Stalker4{}2443	0.000422686	0.000456264	0.0002714	0.000152224	0.00021994	0.000659952	0.000236511	0.000185955	0.000372039	0.000101499	0.000118522	5.07646e-05	6.75874e-05	0.000135144	0.000118363	0.00038891	0.000591736	0.000356127	0.000304305	0.000337889	0.000541115
FBti0060505	INE-1{}2444	0	0.000130856	6.56753e-05	6.54866e-05	0.000196515	0.000229313	6.54088e-05	0.000229085	6.54754e-05	0.000130995	9.83345e-05	0.000131033	3.27106e-05	0.000228921	9.82022e-05	6.54687e-05	0.000127282	0.000196978	6.5456e-05	0.000130824	0.000163679
FBti0060506	invader1{}2445	0.000168795	0	0.000169345	0	0.000422263	0.000591286	0.000252986	8.43853e-05	0	0	0	0	0	0.00016865	0	0.000168812	0.000164099	0.000253956	8.43895e-05	0.000168665	0.000168819
FBti0060508	Cr1a{}2447	1.48216e-05	1.48139e-05	5.94795e-05	0	0	0	0	0	0.000118597	0	0	2.9668e-05	0	0	0	0	5.76372e-05	0	0	0.000207343	0
FBti0060509	INE-1{}2448	0	0	0.000678001	0	0	0	0	0	0	0	0.000225591	0	0.000225126	0.000450148	0	0	0.000219	0	0.000450491	0	0
FBti0060510	INE-1{}2449	0	0	0.000132198	0	0	0.000791288	0.000263323	0.0002635	0.000263591	0.00019776	6.59793e-05	0	0	0.000131656	0.000197671	0.000197673	0.000256207	0	6.58782e-05	0	0.000197682
FBti0060511	INE-1{}2450	0	0	0	0	0	0	0	0	0	0	0.000333482	0	0	0	0	0.000666073	0	0.000334007	0	0	0
FBti0060512	INE-1{}2451	7.27702e-05	7.27325e-05	0.000146014	0.000145595	0.000436906	0.000728323	0	0.000291039	0.00058228	0.000218429	7.2875e-05	0.000145662	0	0	0.000218331	0.000145555	0.000212238	0.000218969	0.000363817	0.000799857	0.000655026
FBti0060513	INE-1{}2452	0	0.000257314	0	0.000343392	0	0.000515334	0	0.000257411	0	8.58623e-05	0	0.000944762	0.000600335	0.000171485	0	0.00077242	0	0.000430373	0.000171616	0.0001715	8.58282e-05
FBti0060514	INE-1{}2453	0.000142938	0.000285727	0	4.76637e-05	0.000524446	0.000429178	0.000333249	0.000190556	9.53111e-05	0.00028603	0.000190858	4.76856e-05	9.52321e-05	0.000142815	0	0.000142952	0	0.000143368	0.000285848	0	0.000190611
FBti0060515	INE-1{}2454	0.000257448	0.000257314	0	0	0.000257616	0.000773001	0.000514476	0.000257411	0	0	0.000515636	0	0	0.000257227	0	0	0	0	0.000514847	0	0
FBti0060516	H{}2455	0.000235664	0	0	0	0	0	0	0	0	0	0	0	0	0	0	0	0	0	0	0	0
FBti0060517	H{}2456	0.000268739	0	0.000359486	0.000179227	0	0.000358624	0	0	8.9598e-05	0.000717025	0.000269126	0.000179309	0.000447618	0.000895031	8.9588e-05	0.000179177	0.000174176	0	0	8.95109e-05	0
FBti0060518	INE-1{}2457	0	0	0	0	0	0.000353797	0	0	0	0	0	0	0	0	0	0	0	0	0	0	0
FBti0060519	INE-1{}2458	0	0	0	0	0	0.000101196	0	0	0	0	0	0	0	0	0	0	0	0.000101415	0	0	0
FBti0060520	1360{}2459	0	0	0	0	0	0	0	0	0	0	0	0	0	0	0	0	0	0	0	0	0
FBti0060521	1360{}2460	0	0	0	0	0	0	0	0	0	0	0	0	0	0	0	0	0	0	0	0	0
FBti0060522	INE-1{}2461	0	0	0	0	0	0	0	0	0	0	0	0	0	0	0	0	0	0	0	0	0
FBti0060523	INE-1{}2462	0	0.000380378	0	0	0	0	0	0	0	0	0	0	0	0	0	0	0	0	0	0	0
FBti0060524	INE-1{}2463	0	0.000197551	0	0	0	0.000692377	0.000197492	9.88125e-05	0	9.88801e-05	0	0	9.87649e-05	0	0.000494179	0	0.000192155	9.91247e-05	0	0.000197501	0
FBti0060525	INE-1{}2464	0.000845787	0.000939276	0.000659976	0.00065808	0.00103441	0.00141085	0.000657298	9.39628e-05	0.000375982	0.000470135	0.000376446	9.40547e-05	0.000469588	0	0.00037594	0.000939857	0.000822259	0.000659818	0.00103364	0.000563424	0.00103389
FBti0060526	INE-1{}2465	0.00029744	0	0	0.000595102	0.000297634	0.00148847	0	0	0	0.0002976	0	0	0	0	0.000297467	0.000594939	0.000578331	0.000596673	0	0	0
FBti0060527	INE-1{}2466	0	0	0	0.000177155	8.86019e-05	0.000531718	0	0	0	0	0	0	0	0	0	0	0	0	0	0.000530856	0
FBti0060528	INE-1{}2467	0	0	0	0	0	0	0	0	0	0	0	0	0	0	0	0	0	0	0	0	0
FBti0060529	INE-1{}2468	0	0	0	0	0	0	0	0	0	0	0	0	0	0	0	0	0	0	0	0	0
FBti0060530	INE-1{}2469	0.000106192	0.00031841	0	0	0.000212522	0.000318846	0.000106105	0	5.31066e-05	0	0	0	0	0	0	0	0	0	0	0	0
FBti0060531	INE-1{}2470	5.28667e-05	9.24688e-05	2.65194e-05	1.32216e-05	1.32253e-05	5.29118e-05	2.64118e-05	1.32148e-05	0	2.64477e-05	1.32357e-05	0	0	0	0	1.3218e-05	0	2.65131e-05	3.96463e-05	2.6413e-05	3.96557e-05
FBti0060532	INE-1{}2471	0	0	0	0	0	0.00102894	0	0	0	0	0	0	0	0	0	0	0	0	0	0	0
FBti0060533	INE-1{}2472	0	0.000186142	0	0	0	0.000931988	0	0.000372424	0	0	0	0.000372788	0	0	0	9.31287e-05	0	9.34001e-05	0	0.000186096	0
FBti0060534	H{}2473	0.000218831	0.000109359	0	0	0	0	0	0	0	0	0	0	0	0	0	0	0	0	0	0	0
FBti0060535	INE-1{}2474	0.00382953	0.00412198	0.00177323	0.0058938	0.00589544	0.00442246	0.00588679	0.00441806	0.00383031	0.00324213	0.00796509	0.00324308	0.00677109	0.00353193	0.00589213	0.00441914	0.00715962	0.00443202	0.00441828	0.00735883	0.00589243
FBti0060536	Doc4{}2475	0.000105916	0.000158792	0.000239088	0	7.9489e-05	0.00098056	7.93724e-05	0.000132376	7.94533e-05	0.000105973	2.65172e-05	0	2.64625e-05	0.000105826	0	5.29634e-05	0.000128712	2.65589e-05	0	0	5.29657e-05
FBti0060537	INE-1{}2476	0	0	0	0	0	0	0	0	0	0	0	0	0	0	0	0	0	0	0	0	0
FBti0060538	INE-1{}2477	0	0	0	0	0	0	0	0	0	0	0	0	0	0	0	0	0	0.000271935	0	0	0
FBti0060539	INE-1{}2478	0	0	0	0	0	0	0	0	0	0	0	0	0	0	0	0	0	0	0	0	0
FBti0060540	Doc{}2479	0.00203962	0.00188498	0.00193414	0.00273915	0.00289368	0.00339062	0.00207984	0.00242345	0.0023195	0.0030541	0.00320374	0.0029781	0.00265963	0.00191923	0.00269646	0.00217954	0.00236996	0.00199673	0.00256326	0.00194034	0.00206087
FBti0060541	INE-1{}2480	0	0	0	0	0	0	0	0	0	0	0	0	0	0	0	0	0	0	0	0	0
FBti0060542	INE-1{}2481	0	0	0	0	0	0	0	0	0	0	0	0	0	0	0	0	0	0	0	0	0
FBti0060543	INE-1{}2482	0	0.000155433	0	0	0.000155616	0	0	0.000155492	0	0	0	0	0	0	0	0	0	0	0	0	0
FBti0060544	INE-1{}2483	0.000283669	0.00141761	0.000569186	0.00368908	0.000283854	0.00198738	0.00141719	0.00255266	0.00113491	0.00482498	0.00482932	0.00652983	0.0068038	0.00340112	0.00255326	0.00113479	0.00165467	0.00312977	0.00425464	0.00170071	0.00170226
FBti0060545	HMS-Beagle{}2484	0	0.000413789	0	6.90264e-05	6.90457e-05	0.000138119	0	6.89907e-05	0	0	0	0	0	0	0	0	0	6.92087e-05	0	0.00027579	0.000138021
FBti0060546	INE-1{}2485	0.0102121	0.00966484	0.014416	0.0164539	0.0136552	0.0093163	0.0125515	0.0151804	0.0110277	0.0113931	0.0109508	0.0102206	0.0207727	0.0133637	0.0150032	0.00795357	0.0124759	0.0117838	0.00650621	0.0060503	0.00921931
FBti0060547	HMS-Beagle{}2486	0	0	0	0	0	0	0	0	0	0	0	0	0	0	0	0	0	0	0	0	0
FBti0060549	HMS-Beagle{}2488	8.55762e-05	0	8.58548e-05	0	0.000256896	8.56491e-05	0	8.55639e-05	0	0	0	0	0	0	0	0	0	0	0	0.000171021	0
FBti0060550	blood{}2489	0	0	0	0	0	0	0	0	0	0	0	0	0	0	0	0	0	0	0	0	0
FBti0060551	HMS-Beagle{}2490	0	0.000286842	0	0.000215324	0.000143589	0.000574471	7.16892e-05	0.000143475	0.000287049	0	0	0	0	7.16863e-05	0	0	0	0	0.000215223	0	0
FBti0060552	F{}2491	0.00038176	0	9.57509e-05	0	0.000191005	0.000382086	0.000190725	0.000190853	0.000190919	0	0.000191155	0	0	9.53584e-05	0.000381795	0	0.00018557	0.000287184	0	9.53667e-05	0
FBti0060553	1360{}2492	0	0.000168553	0.000112793	0.000281172	0.0001125	0.000112523	0.000112335	5.62053e-05	0.000168674	5.62437e-05	5.62942e-05	0.000225041	0.000168535	5.61652e-05	5.62185e-05	0.000224876	0.000109299	0.000112766	0	5.61701e-05	0.000112443
FBti0060554	1360{}2493	0	0	0	0	5.625e-05	0	0	8.43079e-05	0	0	0	0	0	0	2.81092e-05	0	2.73248e-05	0.000112766	0	0	5.62214e-05
FBti0060555	1360{}2494	0	0	0	0	0	0	0	0	0	0	0	0	0	0	0	0	0	0	0	0	0
FBti0060556	1360{}2495	0	0	0	0.00016302	0.000244598	0.000163098	0	0	0.000325984	0	0.000163193	0	0.000325714	0	0	8.14876e-05	7.92129e-05	0.000245175	8.14718e-05	0	0.000407456
FBti0060557	INE-1{}2496	0	0	6.6963e-05	0	0	0.000534421	0	0	0	0	0	0	0	0	0	0	0.000194667	0	0	0	0
FBti0060558	INE-1{}2497	0	0	0	0	0	0	0	0	0	0	0	0	0	0	0	0	0	0	0	0	0
FBti0060559	INE-1{}2498	0	0	0	0	0	0	0	0	0	0	0	0	0	0	0	0	0	0	0	0	0
FBti0060560	INE-1{}2499	0.000324193	0.000648051	0	0.000162157	0.000811012	0.00259576	0.000161965	0	0.000648519	0.000648737	0.00048699	0.000486696	0	0.000485874	0	0.000324226	0.000945525	0.000162585	0	0.000485916	0
FBti0060561	INE-1{}2500	0	0	0	0	0	0	0	0	0	0	0	0	0	0.000347841	0	0	0	0	0	0	0
FBti0060562	McClintock{}2501	0.0123922	0.00516074	0.00863372	0.00619842	0.00275562	0.00516782	0.00515921	0.00413014	0.00241008	0.0024109	0.0044814	0.00344515	0.00412815	0.00653473	0.009295	0.00172131	0.00133861	0.00379792	0.00206517	0.00206378	0.000344277
FBti0060563	F{}2502	0	0	9.57509e-05	0.000190952	0	0.000764172	0.000190725	0	0	0	0.000191155	0	9.53804e-05	0	0.000190898	0	0	0	0	9.53667e-05	0.000190908
FBti0060565	HMS-Beagle{}2504	0	0.000143421	7.19813e-05	0	0.000143589	0.000574471	0	7.17374e-05	0.000143525	0	0	0	7.17028e-05	0	0	7.17549e-05	6.97518e-05	0	0	0	0
FBti0060566	F{}2505	0	0	0	0	0	0.00024287	0.000363699	0	0	0	0	0	0	0	0	0	0	0	0.00012132	0	0
FBti0060568	opus{}2507	6.51836e-05	8.68664e-05	0.000141691	0.000119548	7.60971e-05	0.000141351	8.68406e-05	0	0.000130394	0.000217396	4.35182e-05	6.52379e-05	0.000152	0.000151965	0.000162974	6.51901e-05	2.11234e-05	6.53801e-05	4.34516e-05	6.51334e-05	2.1731e-05
FBti0060570	HMS-Beagle{}2509	0.000172599	0.000431273	0.000346322	0.00215829	0.00405872	0.00561424	0.00232818	0.00207089	0.00284846	0	0	0.000172743	0.000172491	0	0	0.000172616	0.000167797	8.65596e-05	0	0.000172466	0
FBti0060571	opus{}2510	0	0	0	0	0	0	0	0	0	0	0	0	0	0	0	0	0	0	0	0	0
FBti0060572	opus{}2511	0.000274765	0.000411933	0.000551319	0.00192407	0.00137472	0.000687498	0.000549082	0.0010989	0.00123669	0.000274913	0.00055032	0.000137497	0.00109837	0	0.000137395	0.000274792	0.00106849	0.00124017	0.00151106	0.000960937	0.00178623
FBti0060575	mdg1{}2514	0	0	0	0	0	0	0	0	0	0	0	0	0	0	0	0	0	0	0	0	0
FBti0060576	mdg1{}2515	0.000329422	0.000246939	0.000165248	0.000164773	0.000412047	0.000329703	0.000329154	0	0.000658979	0.0002472	0.000164948	0.000164849	0	0	0	0.00115309	0.000400323	0.000330416	0	0.000576046	0.000247102
FBti0060577	mdg1{}2516	0.00235664	0.00170315	0.000945724	0.0016684	0.00108839	0.00134261	0.00242717	0.00126878	0.00116043	0.00108827	0.00116186	0.0018506	0.00170296	0.00184747	0.00137785	0.00174046	0.00151564	0.000654575	0.00126884	0.00199254	0.00206688
FBti0060578	G{}2517	0.00134034	0.00184998	0.00204907	0	0.000191602	0.00178864	0.000191321	6.38164e-05	0.000127677	0	0	0	0	0.000127542	0	0	0.0002482	0.000192054	0	0.000255106	0
FBti0060579	G{}2518	0.00325144	0.00800567	0.0050271	0.000126245	0.0017382	0.00387831	0.00126836	0.00111335	0.00241309	0.000274813	0	1.48591e-05	0.000890248	0.000719451	0	0.000571657	0.000887675	0.000476529	0.000178144	0.000467313	6.682e-05
FBti0060580	Idefix{}2519	0.00114314	0.00388468	0.0034406	0.000457429	0.00114389	0.000228824	0	0.000457192	0.000914702	0.00274503	0.000686874	0.00205938	0.00137092	0.0006853	0.00114325	0.00160056	0.00200042	0.00160523	0.00205747	0.00114227	0.00228662
FBti0060583	S{}2522	0	0	0	0	0	0	0	0	0	0	0	0	0	0	0.000173102	0	0	0	0.00034614	0	0
FBti0060584	Rt1b{}2523	0	8.82432e-05	8.85765e-05	0	0	0	0.000176434	0	8.83069e-05	0	0	0	0	0	0	0	0	0.000354221	0	0	0
FBti0060585	INE-1{}2524	0	0	0	0	0	0	0	0	0	0	0	0	0	0	0	0	0	0	0	0	0
FBti0060586	Rt1b{}2525	0.000220088	0.000373956	0.000264966	4.40341e-05	4.40464e-05	0.000154193	0	4.40113e-05	0	6.60621e-05	0	0	0	6.59699e-05	0	2.2011e-05	4.27932e-05	0	0.000220067	4.39838e-05	6.60359e-05
FBti0060587	G2{}2526	0	0	0	0	0	0	0	0	0	0	0	0	0	0	0	0	0	0	0	0	0
FBti0060588	hopper{}2527	0	0	0	0	0	0	0	0	0	0	0	0	0	0	0	0	0	0	0	0	0
FBti0060589	G2{}2528	0.000583548	0.000291623	0	0.000583766	0	0.0013141	0.000437304	0.00072933	0.000729583	0.000437898	0.000146097	0.000584035	0	0	0	0.000437705	0.000283657	0.000292654	0.000145873	0	0.00116726
FBti0060590	G5A{}2529	0	0	0	0	0	0	0	0	0	0	0	0	0	0	0	0	0	0	0	0	0
FBti0060591	Tabor{}2530	0	0	0	0	0	0	0	0	0	0	0	0	0	0	0	0	0	0	0	0	0
FBti0060592	Quasimodo{}2531	0	0	0	0	0	0	0	0	0	0	0	0	0	0	0	0	0	0	0	0	0
FBti0060593	G5{}2532	0	0	0	0	0	0	0	0	0	0	0	0	0	0	0	0	0	0	0	0	0
FBti0060594	invader3{}2533	0.000217279	0.000144777	0.000217986	0.00010868	0	0.000289952	0.00119406	0.000868989	0.00101417	0.00054349	0.00101543	0.000652379	0.000144762	0.000289457	0	0.000144867	7.04114e-05	0.000290578	0.000579355	0.000542779	0.000579492
FBti0060595	Stalker{}2534	0.00027204	0.000462229	0.000400292	0.000281214	0.000317588	0.000812279	0.000154031	0.000249335	0.000263026	0.000208677	0.000267891	0.000290418	0.000249214	0.000258217	0.000240324	0.000444377	0.000427564	0.000413838	0.000421623	0.000416808	0.000476139
FBti0060597	BS3{}2536	0	0	0	0	0	0	0	0	0	0	0	0	0	0	0	0	0	0	0	0	0
FBti0060598	1360{}2537	0	0	0	0	0	0	0	0	0	0	0	0	0	0	0	0	0	0	0	0	0
FBti0060599	BS3{}2538	0.00476627	0.00430006	0.00454199	0.00458521	0.00469903	0.00462961	0.00303444	0.00375342	0.00385317	0.00451563	0.00484353	0.00472803	0.00517076	0.00512743	0.00454173	0.00440115	0.00498906	0.00566908	0.0050751	0.00514192	0.00503412
FBti0060600	1360{}2539	0	0	0	0	0	0	0	0	0	0	0	0	0	0	0	0	0	0	0	0	0
FBti0060601	1360{}2540	0	0	0	0	0	0	0	0	0	0	0	0	0	0	0	0	0	0	0	0	0
FBti0060602	1360{}2541	0.000256371	0	0.000385808	0.000769399	0.000897882	0.000513178	0.000128081	0.000512667	0.000512845	0.000128255	0.000385109	0.000256584	0.000640525	0.000256151	0.00115377	0.000256396	0.00149543	0.000514287	0.000256346	0.000256173	0.000769222
FBti0060603	1360{}2542	0.000112841	0.000338347	0.00014151	0.000169325	0.000225829	0.000423514	0.000225498	0.000253855	0.000253943	0.000141127	5.65016e-05	0.00022587	0.000169155	0.000338233	0.000197489	5.6426e-05	5.48509e-05	0.000198067	0.00011283	0.000225508	0.0001975
FBti0060604	1360{}2543	0	0	0	0	0	0	0	0	0	0	0	0	0	0	0	0	0	0	0	0	0
FBti0060605	Stalker{}2544	0.000136313	0.000102181	8.54728e-05	0.000204546	0.000102301	0.000204643	3.40504e-05	0.000119256	0.000102255	8.52415e-05	0.000119445	8.52665e-05	0	3.4049e-05	3.40813e-05	6.81632e-05	4.96953e-05	6.83618e-05	0.000102225	6.81039e-05	0.000102249
FBti0060606	Stalker{}2545	0.000567338	0.000992327	0.000426889	0.000603023	0.000922527	0.00230678	0.000496017	0.000709071	0.000638386	0.000212867	0.000994271	0.000567812	0.000496111	0.000283426	0.000638314	0.000709244	0.000482612	0.000213393	0.000425464	0.000637765	0.000602883
[truncated: 3,841 more rows]
